# Supplementary material for: Identification of candidate genes encoding tumor-specific neoantigens in early- and late-stage colon adenocarcinoma
Source: Aging (Albany NY). 2021 Jan 10;13(3):4024–44. doi: 10.18632/aging.202370 (PMC7906157; doi:10.18632/aging.202370)
Supplement: Supplementary Table 1 [file aging-13-202370-s001.xlsx]

## Sheet: stage_specific_network
Supplementary Table 1. Differentially expressed miRNAs and target genes.
mature_mirna_acc	mature_mirna_id	target_symbol	target_entrez	target_ensembl	mirecords	mirtarbase	tarbase	validated.sum	all.sum	logFC	AveExpr	t	P.Value	adj.P.Val	B	regulate
MIMAT0000416	hsa-miR-1-3p	ACADSB	36.0	ENSG00000196177	0	0	1	1	1	-0.343768482270784	-0.23953248644407	-5.04954474728779	7.96125666111578e-07	0.000454833292425835	5.52024810731834	downregulate
MIMAT0004799	hsa-miR-589-5p	ACADSB	36.0	ENSG00000196177	0	0	1	1	1	-0.343768482270784	-0.23953248644407	-5.04954474728779	7.96125666111578e-07	0.000454833292425835	5.52024810731834	downregulate
MIMAT0000088	hsa-miR-30a-3p	ADAMTSL3	57188.0	ENSG00000156218	0	0	1	1	1	0.657930605656657	-1.6352529186041698	2.8962619681688797	0.00407212170684184	0.0486960113374841	-2.16275487391302	upregulate
MIMAT0004569	hsa-miR-222-5p	ADAMTSL3	57188.0	ENSG00000156218	0	0	1	1	1	0.657930605656657	-1.6352529186041698	2.8962619681688797	0.00407212170684184	0.0486960113374841	-2.16275487391302	upregulate
MIMAT0004584	hsa-let-7g-3p	AGPAT5	55326.0	ENSG00000155189	0	1	1	2	2	-0.461084976430082	0.44297122536188	-5.91222881171963	9.73252926942088e-09	4.99497733429853e-05	9.575870802761429	downregulate
MIMAT0000416	hsa-miR-1-3p	AGPAT5	55326.0	ENSG00000155189	0	0	1	1	1	-0.461084976430082	0.44297122536188	-5.91222881171963	9.73252926942088e-09	4.99497733429853e-05	9.575870802761429	downregulate
MIMAT0000424	hsa-miR-128-3p	AGPAT5	55326.0	ENSG00000155189	0	0	1	1	1	-0.461084976430082	0.44297122536188	-5.91222881171963	9.73252926942088e-09	4.99497733429853e-05	9.575870802761429	downregulate
MIMAT0000449	hsa-miR-146a-5p	AGPAT5	55326.0	ENSG00000155189	0	0	1	1	1	-0.461084976430082	0.44297122536188	-5.91222881171963	9.73252926942088e-09	4.99497733429853e-05	9.575870802761429	downregulate
MIMAT0003298	hsa-miR-629-3p	AGPAT5	55326.0	ENSG00000155189	0	0	1	1	1	-0.461084976430082	0.44297122536188	-5.91222881171963	9.73252926942088e-09	4.99497733429853e-05	9.575870802761429	downregulate
MIMAT0004550	hsa-miR-30c-2-3p	AGPAT5	55326.0	ENSG00000155189	0	0	1	1	1	-0.461084976430082	0.44297122536188	-5.91222881171963	9.73252926942088e-09	4.99497733429853e-05	9.575870802761429	downregulate
MIMAT0004584	hsa-let-7g-3p	AGPAT5	55326.0	ENSG00000284980	0	1	0	1	1	-0.461084976430082	0.44297122536188	-5.91222881171963	9.73252926942088e-09	4.99497733429853e-05	9.575870802761429	downregulate
MIMAT0000416	hsa-miR-1-3p	AKAP12	9590.0	ENSG00000131016	0	1	2	2	2	0.714662118261859	-1.1283612195006498	3.4355536865831	0.000680317577875492	0.0191056628675868	-0.5920229107127399	upregulate
MIMAT0000424	hsa-miR-128-3p	AKAP12	9590.0	ENSG00000131016	0	0	1	1	1	0.714662118261859	-1.1283612195006498	3.4355536865831	0.000680317577875492	0.0191056628675868	-0.5920229107127399	upregulate
MIMAT0003257	hsa-miR-550a-3p	AKAP12	9590.0	ENSG00000131016	0	0	1	1	1	0.714662118261859	-1.1283612195006498	3.4355536865831	0.000680317577875492	0.0191056628675868	-0.5920229107127399	upregulate
MIMAT0003298	hsa-miR-629-3p	AKAP2	11217.0		0	1	0	1	1	0.44736067841761606	-0.0485520141889172	3.35755126526057	0.0008945056673514571	0.0220978421721517	-0.8345016243250201	upregulate
MIMAT0004601	hsa-miR-145-3p	AKAP2	11217.0		0	1	0	1	1	0.44736067841761606	-0.0485520141889172	3.35755126526057	0.0008945056673514571	0.0220978421721517	-0.8345016243250201	upregulate
MIMAT0000449	hsa-miR-146a-5p	APBB1	322.0	ENSG00000166313	0	0	1	1	1	0.5748083060057231	-2.1636487338326105	3.8504449411681803	0.00014594560431855201	0.00858486335546003	0.78255911403449	upregulate
MIMAT0004584	hsa-let-7g-3p	APBB1	322.0	ENSG00000166313	0	0	1	1	1	0.5748083060057231	-2.1636487338326105	3.8504449411681803	0.00014594560431855201	0.00858486335546003	0.78255911403449	upregulate
MIMAT0000416	hsa-miR-1-3p	APOL6	80830.0	ENSG00000221963	0	0	2	1	1	-0.269602813076459	0.242494192787119	-3.11025800491906	0.0020607084833287	0.0342632691301765	-1.56922828913576	downregulate
MIMAT0000427	hsa-miR-133a-3p	APOL6	80830.0	ENSG00000221963	0	1	0	1	1	-0.269602813076459	0.242494192787119	-3.11025800491906	0.0020607084833287	0.0342632691301765	-1.56922828913576	downregulate
MIMAT0000449	hsa-miR-146a-5p	APOL6	80830.0	ENSG00000221963	0	0	1	1	1	-0.269602813076459	0.242494192787119	-3.11025800491906	0.0020607084833287	0.0342632691301765	-1.56922828913576	downregulate
MIMAT0004799	hsa-miR-589-5p	APOL6	80830.0	ENSG00000221963	0	1	0	1	1	-0.269602813076459	0.242494192787119	-3.11025800491906	0.0020607084833287	0.0342632691301765	-1.56922828913576	downregulate
MIMAT0000416	hsa-miR-1-3p	BRI3BP	140707.0	ENSG00000184992	0	2	2	2	2	-0.25565600020518897	1.3499805197121701	-3.2123440438440096	0.0014691496734130802	0.0285220811266599	-1.27222428575007	downregulate
MIMAT0000424	hsa-miR-128-3p	BRI3BP	140707.0	ENSG00000184992	0	0	1	1	1	-0.25565600020518897	1.3499805197121701	-3.2123440438440096	0.0014691496734130802	0.0285220811266599	-1.27222428575007	downregulate
MIMAT0000427	hsa-miR-133a-3p	BRI3BP	140707.0	ENSG00000184992	0	0	1	1	1	-0.25565600020518897	1.3499805197121701	-3.2123440438440096	0.0014691496734130802	0.0285220811266599	-1.27222428575007	downregulate
MIMAT0000449	hsa-miR-146a-5p	BRI3BP	140707.0	ENSG00000184992	0	0	1	1	1	-0.25565600020518897	1.3499805197121701	-3.2123440438440096	0.0014691496734130802	0.0285220811266599	-1.27222428575007	downregulate
MIMAT0003257	hsa-miR-550a-3p	BRI3BP	140707.0	ENSG00000184992	0	0	1	1	1	-0.25565600020518897	1.3499805197121701	-3.2123440438440096	0.0014691496734130802	0.0285220811266599	-1.27222428575007	downregulate
MIMAT0004550	hsa-miR-30c-2-3p	BRI3BP	140707.0	ENSG00000184992	0	1	0	1	1	-0.25565600020518897	1.3499805197121701	-3.2123440438440096	0.0014691496734130802	0.0285220811266599	-1.27222428575007	downregulate
MIMAT0004569	hsa-miR-222-5p	BRI3BP	140707.0	ENSG00000184992	0	0	1	1	1	-0.25565600020518897	1.3499805197121701	-3.2123440438440096	0.0014691496734130802	0.0285220811266599	-1.27222428575007	downregulate
MIMAT0000416	hsa-miR-1-3p	C18orf32	497661.0	ENSG00000177576	0	0	2	1	1	-0.20991434207778198	-0.7931105238849191	-3.2443760747588803	0.0013188110502328802	0.0272647251261137	-1.17720079320393	downregulate
MIMAT0000424	hsa-miR-128-3p	C18orf32	497661.0	ENSG00000177576	0	0	1	1	1	-0.20991434207778198	-0.7931105238849191	-3.2443760747588803	0.0013188110502328802	0.0272647251261137	-1.17720079320393	downregulate
MIMAT0003298	hsa-miR-629-3p	C18orf32	497661.0	ENSG00000177576	0	1	0	1	1	-0.20991434207778198	-0.7931105238849191	-3.2443760747588803	0.0013188110502328802	0.0272647251261137	-1.17720079320393	downregulate
MIMAT0004799	hsa-miR-589-5p	C18orf32	497661.0	ENSG00000177576	0	0	1	1	1	-0.20991434207778198	-0.7931105238849191	-3.2443760747588803	0.0013188110502328802	0.0272647251261137	-1.17720079320393	downregulate
MIMAT0000088	hsa-miR-30a-3p	CCDC25	55246.0	ENSG00000147419	0	1	1	2	2	-0.294520752202809	-0.183489258170618	-4.32115979286924	2.1537008961845e-05	0.00309184095788612	2.51052385528024	downregulate
MIMAT0000416	hsa-miR-1-3p	CCDC25	55246.0	ENSG00000147419	0	0	2	1	1	-0.294520752202809	-0.183489258170618	-4.32115979286924	2.1537008961845e-05	0.00309184095788612	2.51052385528024	downregulate
MIMAT0004500	hsa-miR-26b-3p	CCDC25	55246.0	ENSG00000147419	0	0	1	1	1	-0.294520752202809	-0.183489258170618	-4.32115979286924	2.1537008961845e-05	0.00309184095788612	2.51052385528024	downregulate
MIMAT0000088	hsa-miR-30a-3p	CCNB1	891.0	ENSG00000134057	0	0	1	1	1	-0.390444337979271	1.44580488440445	-4.7651232599183	3.0260004216070097e-06	0.000913540627281916	4.29790536551448	downregulate
MIMAT0000449	hsa-miR-146a-5p	CCNB1	891.0	ENSG00000134057	0	0	1	1	1	-0.390444337979271	1.44580488440445	-4.7651232599183	3.0260004216070097e-06	0.000913540627281916	4.29790536551448	downregulate
MIMAT0004584	hsa-let-7g-3p	CCNB1	891.0	ENSG00000134057	0	2	0	1	1	-0.390444337979271	1.44580488440445	-4.7651232599183	3.0260004216070097e-06	0.000913540627281916	4.29790536551448	downregulate
MIMAT0004799	hsa-miR-589-5p	CCNB1	891.0	ENSG00000134057	0	0	1	1	1	-0.390444337979271	1.44580488440445	-4.7651232599183	3.0260004216070097e-06	0.000913540627281916	4.29790536551448	downregulate
MIMAT0000424	hsa-miR-128-3p	CDKN1C	1028.0	ENSG00000129757	0	0	1	1	1	0.531551839516173	-1.00546303889666	3.6363183387883504	0.000328700056526747	0.013051998956359	0.0554274168143163	upregulate
MIMAT0000427	hsa-miR-133a-3p	CDKN1C	1028.0	ENSG00000129757	0	0	1	1	1	0.531551839516173	-1.00546303889666	3.6363183387883504	0.000328700056526747	0.013051998956359	0.0554274168143163	upregulate
MIMAT0000449	hsa-miR-146a-5p	CDKN1C	1028.0	ENSG00000129757	0	0	1	1	1	0.531551839516173	-1.00546303889666	3.6363183387883504	0.000328700056526747	0.013051998956359	0.0554274168143163	upregulate
MIMAT0004569	hsa-miR-222-5p	CDKN1C	1028.0	ENSG00000129757	0	1	0	1	1	0.531551839516173	-1.00546303889666	3.6363183387883504	0.000328700056526747	0.013051998956359	0.0554274168143163	upregulate
MIMAT0004569	hsa-miR-222-5p	CDKN1C	1028.0	ENSG00000273707	0	1	0	1	1	0.531551839516173	-1.00546303889666	3.6363183387883504	0.000328700056526747	0.013051998956359	0.0554274168143163	upregulate
MIMAT0004584	hsa-let-7g-3p	CDKN1C	1028.0	ENSG00000129757	0	0	1	1	1	0.531551839516173	-1.00546303889666	3.6363183387883504	0.000328700056526747	0.013051998956359	0.0554274168143163	upregulate
MIMAT0004584	hsa-let-7g-3p	CES3	23491.0	ENSG00000172828	0	1	0	1	1	-0.612511088337896	3.11922624241021	-2.9502182897580997	0.00344194859300763	0.0449591868169194	-2.01683702896123	downregulate
MIMAT0000416	hsa-miR-1-3p	CKS2	1164.0	ENSG00000123975	0	0	1	1	1	-0.279202838695919	1.27964823088336	-3.2552421152957405	0.0012711439622246	0.0268167525977463	-1.1447685271645	downregulate
MIMAT0000424	hsa-miR-128-3p	CKS2	1164.0	ENSG00000123975	0	0	1	1	1	-0.279202838695919	1.27964823088336	-3.2552421152957405	0.0012711439622246	0.0268167525977463	-1.1447685271645	downregulate
MIMAT0004584	hsa-let-7g-3p	CKS2	1164.0	ENSG00000123975	0	4	0	1	1	-0.279202838695919	1.27964823088336	-3.2552421152957405	0.0012711439622246	0.0268167525977463	-1.1447685271645	downregulate
MIMAT0000416	hsa-miR-1-3p	COX7C	1350.0	ENSG00000127184	0	0	1	1	1	-0.206358183029315	0.28016702478460404	-3.38419557110983	0.000815122898764929	0.0209458353974638	-0.7522496572014059	downregulate
MIMAT0000427	hsa-miR-133a-3p	COX7C	1350.0	ENSG00000127184	0	0	1	1	1	-0.206358183029315	0.28016702478460404	-3.38419557110983	0.000815122898764929	0.0209458353974638	-0.7522496572014059	downregulate
MIMAT0003257	hsa-miR-550a-3p	COX7C	1350.0	ENSG00000127184	0	0	1	1	1	-0.206358183029315	0.28016702478460404	-3.38419557110983	0.000815122898764929	0.0209458353974638	-0.7522496572014059	downregulate
MIMAT0000427	hsa-miR-133a-3p	CXCL10	3627.0	ENSG00000169245	0	0	1	1	1	-0.8122028591924458	0.293896140096122	-3.4645586741175003	0.000613699706391633	0.0181275413993005	-0.500557094865879	downregulate
MIMAT0000449	hsa-miR-146a-5p	CXCL10	3627.0	ENSG00000169245	0	0	2	1	1	-0.8122028591924458	0.293896140096122	-3.4645586741175003	0.000613699706391633	0.0181275413993005	-0.500557094865879	downregulate
MIMAT0003257	hsa-miR-550a-3p	CXCL10	3627.0	ENSG00000169245	0	1	0	1	1	-0.8122028591924458	0.293896140096122	-3.4645586741175003	0.000613699706391633	0.0181275413993005	-0.500557094865879	downregulate
MIMAT0004494	hsa-miR-21-3p	CXCL10	3627.0	ENSG00000169245	0	0	1	1	1	-0.8122028591924458	0.293896140096122	-3.4645586741175003	0.000613699706391633	0.0181275413993005	-0.500557094865879	downregulate
MIMAT0000416	hsa-miR-1-3p	DCTN6	10671.0	ENSG00000104671	0	0	1	1	1	-0.288629299036536	-0.31478112360000504	-3.9782894822826402	8.831475875654721e-05	0.00669008738934744	1.2344334227434	downregulate
MIMAT0003298	hsa-miR-629-3p	DCTN6	10671.0	ENSG00000104671	0	1	0	1	1	-0.288629299036536	-0.31478112360000504	-3.9782894822826402	8.831475875654721e-05	0.00669008738934744	1.2344334227434	downregulate
MIMAT0000416	hsa-miR-1-3p	DEPDC1	55635.0	ENSG00000024526	0	0	2	1	1	-0.39055555954044996	1.4906253409948103	-4.04599087817116	6.73308479408245e-05	0.00592762109919275	1.47903714594648	downregulate
MIMAT0003298	hsa-miR-629-3p	DEPDC1	55635.0	ENSG00000024526	0	0	1	1	1	-0.39055555954044996	1.4906253409948103	-4.04599087817116	6.73308479408245e-05	0.00592762109919275	1.47903714594648	downregulate
MIMAT0004494	hsa-miR-21-3p	DEPDC1	55635.0	ENSG00000024526	0	0	1	1	1	-0.39055555954044996	1.4906253409948103	-4.04599087817116	6.73308479408245e-05	0.00592762109919275	1.47903714594648	downregulate
MIMAT0004500	hsa-miR-26b-3p	DEPDC1	55635.0	ENSG00000024526	0	0	1	1	1	-0.39055555954044996	1.4906253409948103	-4.04599087817116	6.73308479408245e-05	0.00592762109919275	1.47903714594648	downregulate
MIMAT0000424	hsa-miR-128-3p	DPYSL5	56896.0	ENSG00000157851	0	0	1	1	1	0.4399788891166	-1.78796260949069	3.06380815906714	0.00239681258093618	0.0370513294232221	-1.7014139611029602	upregulate
MIMAT0003257	hsa-miR-550a-3p	DPYSL5	56896.0	ENSG00000157851	0	0	1	1	1	0.4399788891166	-1.78796260949069	3.06380815906714	0.00239681258093618	0.0370513294232221	-1.7014139611029602	upregulate
MIMAT0004550	hsa-miR-30c-2-3p	DPYSL5	56896.0	ENSG00000157851	0	1	0	1	1	0.4399788891166	-1.78796260949069	3.06380815906714	0.00239681258093618	0.0370513294232221	-1.7014139611029602	upregulate
MIMAT0003257	hsa-miR-550a-3p	EFHB	151651.0	ENSG00000163576	0	1	0	1	1	0.457724728427661	-1.48886910499769	3.85331856043854	0.000144327738553616	0.00856330677678378	0.792571274075309	upregulate
MIMAT0000416	hsa-miR-1-3p	EIF5AL1	143244.0	ENSG00000253626	0	0	2	1	1	-0.236023862471939	0.413278834543017	-3.51475175795051	0.0005126236537339099	0.0160177336187267	-0.340616316214649	downregulate
MIMAT0000455	hsa-miR-185-5p	EIF5AL1	143244.0	ENSG00000253626	0	3	0	1	1	-0.236023862471939	0.413278834543017	-3.51475175795051	0.0005126236537339099	0.0160177336187267	-0.340616316214649	downregulate
MIMAT0005920	hsa-miR-1266-5p	EIF5AL1	143244.0	ENSG00000253626	0	1	0	1	1	-0.236023862471939	0.413278834543017	-3.51475175795051	0.0005126236537339099	0.0160177336187267	-0.340616316214649	downregulate
MIMAT0000088	hsa-miR-30a-3p	ENTPD4	9583.0	ENSG00000197217	0	1	0	1	1	-0.278013993646334	0.0358590341210325	-3.3774586831313393	0.00083454913488364	0.0211251038101433	-0.773103084575952	downregulate
MIMAT0000416	hsa-miR-1-3p	ENTPD4	9583.0	ENSG00000197217	0	0	1	1	1	-0.278013993646334	0.0358590341210325	-3.3774586831313393	0.00083454913488364	0.0211251038101433	-0.773103084575952	downregulate
MIMAT0004494	hsa-miR-21-3p	ENTPD4	9583.0	ENSG00000197217	0	0	1	1	1	-0.278013993646334	0.0358590341210325	-3.3774586831313393	0.00083454913488364	0.0211251038101433	-0.773103084575952	downregulate
MIMAT0004569	hsa-miR-222-5p	ENTPD4	9583.0	ENSG00000197217	0	1	0	1	1	-0.278013993646334	0.0358590341210325	-3.3774586831313393	0.00083454913488364	0.0211251038101433	-0.773103084575952	downregulate
MIMAT0004500	hsa-miR-26b-3p	EPHX2	2053.0	ENSG00000120915	0	1	0	1	1	-0.416885002049343	0.786123328942198	-3.18922643526721	0.00158734922198497	0.0296242656164813	-1.3402606151275	downregulate
MIMAT0000449	hsa-miR-146a-5p	FAM83F	113828.0	ENSG00000133477	0	0	1	1	1	-0.348453397212638	2.95145612096502	-3.8542454808757203	0.000143809508395925	0.00856330677678378	0.795802242345763	downregulate
MIMAT0005920	hsa-miR-1266-5p	FAM83F	113828.0	ENSG00000133477	0	1	0	1	1	-0.348453397212638	2.95145612096502	-3.8542454808757203	0.000143809508395925	0.00856330677678378	0.795802242345763	downregulate
MIMAT0000416	hsa-miR-1-3p	FDFT1	2222.0	ENSG00000079459	0	0	1	1	1	-0.449278545808996	0.756138050816479	-5.003875205236	9.90468215650927e-07	0.000495934682904826	5.32000688207559	downregulate
MIMAT0000424	hsa-miR-128-3p	FDFT1	2222.0	ENSG00000079459	0	0	1	1	1	-0.449278545808996	0.756138050816479	-5.003875205236	9.90468215650927e-07	0.000495934682904826	5.32000688207559	downregulate
MIMAT0000455	hsa-miR-185-5p	FDFT1	2222.0	ENSG00000079459	0	0	1	1	1	-0.449278545808996	0.756138050816479	-5.003875205236	9.90468215650927e-07	0.000495934682904826	5.32000688207559	downregulate
MIMAT0003298	hsa-miR-629-3p	FDFT1	2222.0	ENSG00000079459	0	0	1	1	1	-0.449278545808996	0.756138050816479	-5.003875205236	9.90468215650927e-07	0.000495934682904826	5.32000688207559	downregulate
MIMAT0004550	hsa-miR-30c-2-3p	FDFT1	2222.0	ENSG00000079459	0	0	1	1	1	-0.449278545808996	0.756138050816479	-5.003875205236	9.90468215650927e-07	0.000495934682904826	5.32000688207559	downregulate
MIMAT0000416	hsa-miR-1-3p	FHL1	2273.0	ENSG00000022267	0	0	2	1	1	0.546265279770679	-1.68558568098383	3.0942993194054105	0.00217094411161225	0.0353666074454043	-1.6148519168888797	upregulate
MIMAT0000427	hsa-miR-133a-3p	FHL1	2273.0	ENSG00000022267	0	0	1	1	1	0.546265279770679	-1.68558568098383	3.0942993194054105	0.00217094411161225	0.0353666074454043	-1.6148519168888797	upregulate
MIMAT0004569	hsa-miR-222-5p	FHL1	2273.0	ENSG00000022267	0	0	1	1	1	0.546265279770679	-1.68558568098383	3.0942993194054105	0.00217094411161225	0.0353666074454043	-1.6148519168888797	upregulate
MIMAT0000416	hsa-miR-1-3p	FLNA	2316.0	ENSG00000196924	0	2	2	2	2	0.43022670629266796	-0.618929800630515	2.87904594221623	0.00429433087705351	0.0499894916649067	-2.2087811018309704	upregulate
MIMAT0000088	hsa-miR-30a-3p	FLNA	2316.0	ENSG00000196924	0	0	1	1	1	0.43022670629266796	-0.618929800630515	2.87904594221623	0.00429433087705351	0.0499894916649067	-2.2087811018309704	upregulate
MIMAT0000424	hsa-miR-128-3p	FLNA	2316.0	ENSG00000196924	0	0	1	1	1	0.43022670629266796	-0.618929800630515	2.87904594221623	0.00429433087705351	0.0499894916649067	-2.2087811018309704	upregulate
MIMAT0004584	hsa-let-7g-3p	FLNA	2316.0	ENSG00000196924	0	0	1	1	1	0.43022670629266796	-0.618929800630515	2.87904594221623	0.00429433087705351	0.0499894916649067	-2.2087811018309704	upregulate
MIMAT0000088	hsa-miR-30a-3p	FXN	2395.0	ENSG00000165060	0	1	0	1	1	-0.23692707522028	0.388909124824733	-3.85105487872903	0.000145600776950976	0.00858486335546003	0.7846836775311721	downregulate
MIMAT0000416	hsa-miR-1-3p	FXN	2395.0	ENSG00000165060	0	0	1	1	1	-0.23692707522028	0.388909124824733	-3.85105487872903	0.000145600776950976	0.00858486335546003	0.7846836775311721	downregulate
MIMAT0004569	hsa-miR-222-5p	FXN	2395.0	ENSG00000165060	0	1	0	1	1	-0.23692707522028	0.388909124824733	-3.85105487872903	0.000145600776950976	0.00858486335546003	0.7846836775311721	downregulate
MIMAT0004799	hsa-miR-589-5p	FXN	2395.0	ENSG00000165060	0	1	0	1	1	-0.23692707522028	0.388909124824733	-3.85105487872903	0.000145600776950976	0.00858486335546003	0.7846836775311721	downregulate
MIMAT0000416	hsa-miR-1-3p	GEM	2669.0	ENSG00000164949	0	0	1	1	1	0.44225347919672997	0.206620803747412	3.59649413499491	0.000380715626421043	0.0138576437851021	-0.0756603295924823	upregulate
MIMAT0004601	hsa-miR-145-3p	GEM	2669.0	ENSG00000164949	0	1	0	1	1	0.44225347919672997	0.206620803747412	3.59649413499491	0.000380715626421043	0.0138576437851021	-0.0756603295924823	upregulate
MIMAT0000416	hsa-miR-1-3p	GTSE1	51512.0	ENSG00000075218	0	0	1	1	1	-0.24437242775125698	1.57669502435153	-3.3801717787162406	0.000826674399869399	0.0210524884786047	-0.764709531199271	downregulate
MIMAT0004500	hsa-miR-26b-3p	GTSE1	51512.0	ENSG00000075218	0	0	1	1	1	-0.24437242775125698	1.57669502435153	-3.3801717787162406	0.000826674399869399	0.0210524884786047	-0.764709531199271	downregulate
MIMAT0000416	hsa-miR-1-3p	HCCS	3052.0	ENSG00000004961	0	0	1	1	1	-0.292815382250427	0.628867702297487	-4.98327912464318	1.0924534789116998e-06	0.000521557615548333	5.23019489484032	downregulate
MIMAT0004500	hsa-miR-26b-3p	HCCS	3052.0	ENSG00000004961	0	0	1	1	1	-0.292815382250427	0.628867702297487	-4.98327912464318	1.0924534789116998e-06	0.000521557615548333	5.23019489484032	downregulate
MIMAT0003298	hsa-miR-629-3p	HSPA8	3312.0	ENSG00000109971	0	0	1	1	1	-0.27568879381013	0.442425354398017	-4.47395506950264	1.1149115925099499e-05	0.00206446897223716	3.1087485216839097	downregulate
MIMAT0004494	hsa-miR-21-3p	HSPA8	3312.0	ENSG00000109971	0	0	1	1	1	-0.27568879381013	0.442425354398017	-4.47395506950264	1.1149115925099499e-05	0.00206446897223716	3.1087485216839097	downregulate
MIMAT0004500	hsa-miR-26b-3p	HSPA8	3312.0	ENSG00000109971	0	0	1	1	1	-0.27568879381013	0.442425354398017	-4.47395506950264	1.1149115925099499e-05	0.00206446897223716	3.1087485216839097	downregulate
MIMAT0000416	hsa-miR-1-3p	IGF2BP1	10642.0	ENSG00000159217	0	0	1	1	1	1.0915510760401501	-0.244354125917418	3.2928038961255197	0.00111841019132056	0.0251502326214696	-1.03188534705073	upregulate
MIMAT0000449	hsa-miR-146a-5p	IGF2BP1	10642.0	ENSG00000159217	0	0	2	1	1	1.0915510760401501	-0.244354125917418	3.2928038961255197	0.00111841019132056	0.0251502326214696	-1.03188534705073	upregulate
MIMAT0000455	hsa-miR-185-5p	IGF2BP1	10642.0	ENSG00000159217	0	0	1	1	1	1.0915510760401501	-0.244354125917418	3.2928038961255197	0.00111841019132056	0.0251502326214696	-1.03188534705073	upregulate
MIMAT0003257	hsa-miR-550a-3p	IGF2BP1	10642.0	ENSG00000159217	0	0	1	1	1	1.0915510760401501	-0.244354125917418	3.2928038961255197	0.00111841019132056	0.0251502326214696	-1.03188534705073	upregulate
MIMAT0004500	hsa-miR-26b-3p	IGF2BP1	10642.0	ENSG00000159217	0	0	1	1	1	1.0915510760401501	-0.244354125917418	3.2928038961255197	0.00111841019132056	0.0251502326214696	-1.03188534705073	upregulate
MIMAT0004550	hsa-miR-30c-2-3p	IGF2BP1	10642.0	ENSG00000159217	0	0	1	1	1	1.0915510760401501	-0.244354125917418	3.2928038961255197	0.00111841019132056	0.0251502326214696	-1.03188534705073	upregulate
MIMAT0004799	hsa-miR-589-5p	IGF2BP1	10642.0	ENSG00000159217	0	0	1	1	1	1.0915510760401501	-0.244354125917418	3.2928038961255197	0.00111841019132056	0.0251502326214696	-1.03188534705073	upregulate
MIMAT0003257	hsa-miR-550a-3p	KCNE4	23704.0	ENSG00000152049	0	2	0	1	1	0.46240160381226003	-0.608856089664199	2.91766622812546	0.0038105012327649796	0.0472663322099288	-2.10517225775435	upregulate
MIMAT0000449	hsa-miR-146a-5p	KIF1A	547.0	ENSG00000130294	0	0	1	1	1	0.9376708290632059	-3.13943567520168	3.88780668176646	0.000126189429334776	0.00806301440105298	0.9132545164009391	upregulate
MIMAT0003298	hsa-miR-629-3p	KIF1A	547.0	ENSG00000130294	0	0	1	1	1	0.9376708290632059	-3.13943567520168	3.88780668176646	0.000126189429334776	0.00806301440105298	0.9132545164009391	upregulate
MIMAT0000416	hsa-miR-1-3p	KITLG	4254.0	ENSG00000049130	0	0	2	1	1	-0.295217626563125	-0.0680693911042757	-2.92646392913212	0.0037074932520933896	0.0465511492184863	-2.08138893579707	downregulate
MIMAT0000455	hsa-miR-185-5p	KITLG	4254.0	ENSG00000049130	0	1	0	1	1	-0.295217626563125	-0.0680693911042757	-2.92646392913212	0.0037074932520933896	0.0465511492184863	-2.08138893579707	downregulate
MIMAT0004494	hsa-miR-21-3p	KITLG	4254.0	ENSG00000049130	0	0	1	1	1	-0.295217626563125	-0.0680693911042757	-2.92646392913212	0.0037074932520933896	0.0465511492184863	-2.08138893579707	downregulate
MIMAT0004569	hsa-miR-222-5p	KITLG	4254.0	ENSG00000049130	0	1	0	1	1	-0.295217626563125	-0.0680693911042757	-2.92646392913212	0.0037074932520933896	0.0465511492184863	-2.08138893579707	downregulate
MIMAT0000416	hsa-miR-1-3p	KLF7	8609.0	ENSG00000118263	0	0	1	1	1	0.452484212953375	-0.29947435006622	3.2382696577602403	0.00134632116010676	0.0274192729125314	-1.1953828422737198	upregulate
MIMAT0000449	hsa-miR-146a-5p	KLF7	8609.0	ENSG00000118263	0	0	1	1	1	0.452484212953375	-0.29947435006622	3.2382696577602403	0.00134632116010676	0.0274192729125314	-1.1953828422737198	upregulate
MIMAT0004550	hsa-miR-30c-2-3p	KLF7	8609.0	ENSG00000118263	0	1	0	1	1	0.452484212953375	-0.29947435006622	3.2382696577602403	0.00134632116010676	0.0274192729125314	-1.1953828422737198	upregulate
MIMAT0004584	hsa-let-7g-3p	KLF7	8609.0	ENSG00000118263	0	1	0	1	1	0.452484212953375	-0.29947435006622	3.2382696577602403	0.00134632116010676	0.0274192729125314	-1.1953828422737198	upregulate
MIMAT0000416	hsa-miR-1-3p	L1CAM	3897.0	ENSG00000198910	0	1	1	2	2	0.8630500819840079	-0.420178662980957	2.91490913031636	0.0038433167763328	0.0472948367170194	-2.11261184695328	upregulate
MIMAT0000449	hsa-miR-146a-5p	L1CAM	3897.0	ENSG00000198910	0	1	0	1	1	0.8630500819840079	-0.420178662980957	2.91490913031636	0.0038433167763328	0.0472948367170194	-2.11261184695328	upregulate
MIMAT0004494	hsa-miR-21-3p	L1CAM	3897.0	ENSG00000198910	0	1	0	1	1	0.8630500819840079	-0.420178662980957	2.91490913031636	0.0038433167763328	0.0472948367170194	-2.11261184695328	upregulate
MIMAT0004799	hsa-miR-589-5p	L1CAM	3897.0	ENSG00000198910	0	0	1	1	1	0.8630500819840079	-0.420178662980957	2.91490913031636	0.0038433167763328	0.0472948367170194	-2.11261184695328	upregulate
MIMAT0003257	hsa-miR-550a-3p	LATS2	26524.0	ENSG00000150457	0	0	1	1	1	0.45310808567315897	-0.41706661663824396	4.694468359371901	4.17701702242036e-06	0.0010993587494008699	4.00349181153001	upregulate
MIMAT0000416	hsa-miR-1-3p	LIMS2	55679.0	ENSG00000072163	0	0	1	1	1	0.44701807747509703	-0.59723754795591	3.01461361510675	0.0028072250587560603	0.0404134104005632	-1.8393873049179301	upregulate
MIMAT0000449	hsa-miR-146a-5p	LIMS2	55679.0	ENSG00000072163	0	0	1	1	1	0.44701807747509703	-0.59723754795591	3.01461361510675	0.0028072250587560603	0.0404134104005632	-1.8393873049179301	upregulate
MIMAT0026477	hsa-miR-128-1-5p	LIMS2	55679.0	ENSG00000072163	0	2	0	1	1	0.44701807747509703	-0.59723754795591	3.01461361510675	0.0028072250587560603	0.0404134104005632	-1.8393873049179301	upregulate
MIMAT0000416	hsa-miR-1-3p	LRIG3	121227.0	ENSG00000139263	0	0	2	1	1	-0.217105149621521	0.782372869196312	-3.16346407326456	0.00172940509854338	0.0308995326827126	-1.41554383050845	downregulate
MIMAT0000424	hsa-miR-128-3p	LRIG3	121227.0	ENSG00000139263	0	0	1	1	1	-0.217105149621521	0.782372869196312	-3.16346407326456	0.00172940509854338	0.0308995326827126	-1.41554383050845	downregulate
MIMAT0000449	hsa-miR-146a-5p	LRIG3	121227.0	ENSG00000139263	0	0	1	1	1	-0.217105149621521	0.782372869196312	-3.16346407326456	0.00172940509854338	0.0308995326827126	-1.41554383050845	downregulate
MIMAT0003257	hsa-miR-550a-3p	LRIG3	121227.0	ENSG00000139263	0	0	1	1	1	-0.217105149621521	0.782372869196312	-3.16346407326456	0.00172940509854338	0.0308995326827126	-1.41554383050845	downregulate
MIMAT0000416	hsa-miR-1-3p	LYPLAL1	127018.0	ENSG00000143353	0	0	1	1	1	-0.21741723713870997	-0.400060643625032	-2.94344702545658	0.00351581211924465	0.0453937779848889	-2.03528763031581	downregulate
MIMAT0004500	hsa-miR-26b-3p	LYPLAL1	127018.0	ENSG00000143353	0	0	1	1	1	-0.21741723713870997	-0.400060643625032	-2.94344702545658	0.00351581211924465	0.0453937779848889	-2.03528763031581	downregulate
MIMAT0000416	hsa-miR-1-3p	MAPRE3	22924.0	ENSG00000084764	0	0	1	1	1	0.465719445582942	-0.551000547393037	4.3401389338361005	1.9865248185865e-05	0.0030366972088226897	2.58385132748039	upregulate
MIMAT0000449	hsa-miR-146a-5p	MAPRE3	22924.0	ENSG00000084764	0	0	1	1	1	0.465719445582942	-0.551000547393037	4.3401389338361005	1.9865248185865e-05	0.0030366972088226897	2.58385132748039	upregulate
MIMAT0004799	hsa-miR-589-5p	MAPRE3	22924.0	ENSG00000084764	0	0	1	1	1	0.465719445582942	-0.551000547393037	4.3401389338361005	1.9865248185865e-05	0.0030366972088226897	2.58385132748039	upregulate
MIMAT0000424	hsa-miR-128-3p	MCCC2	64087.0	ENSG00000131844	0	0	1	1	1	-0.23147728530458397	0.44636360228258504	-3.76513683364366	0.000202580257408448	0.0101186620543504	0.488383846347956	downregulate
MIMAT0004569	hsa-miR-222-5p	MCCC2	64087.0	ENSG00000131844	0	1	0	1	1	-0.23147728530458397	0.44636360228258504	-3.76513683364366	0.000202580257408448	0.0101186620543504	0.488383846347956	downregulate
MIMAT0004569	hsa-miR-222-5p	MCCC2	64087.0	ENSG00000275300	0	1	0	1	1	-0.23147728530458397	0.44636360228258504	-3.76513683364366	0.000202580257408448	0.0101186620543504	0.488383846347956	downregulate
MIMAT0004569	hsa-miR-222-5p	MCCC2	64087.0	ENSG00000281742	0	1	0	1	1	-0.23147728530458397	0.44636360228258504	-3.76513683364366	0.000202580257408448	0.0101186620543504	0.488383846347956	downregulate
MIMAT0000455	hsa-miR-185-5p	MDM2	4193.0	ENSG00000135679	0	1	1	2	2	-0.30904522955573605	-0.6226553801660091	-4.49153764583813	1.03236834404419e-05	0.0020184275937984	3.1787378502815495	downregulate
MIMAT0003257	hsa-miR-550a-3p	MDM2	4193.0	ENSG00000135679	0	1	1	2	2	-0.30904522955573605	-0.6226553801660091	-4.49153764583813	1.03236834404419e-05	0.0020184275937984	3.1787378502815495	downregulate
MIMAT0000088	hsa-miR-30a-3p	MDM2	4193.0	ENSG00000135679	0	0	1	1	1	-0.30904522955573605	-0.6226553801660091	-4.49153764583813	1.03236834404419e-05	0.0020184275937984	3.1787378502815495	downregulate
MIMAT0000416	hsa-miR-1-3p	MDM2	4193.0	ENSG00000135679	0	0	1	1	1	-0.30904522955573605	-0.6226553801660091	-4.49153764583813	1.03236834404419e-05	0.0020184275937984	3.1787378502815495	downregulate
MIMAT0000449	hsa-miR-146a-5p	MDM2	4193.0	ENSG00000135679	0	0	1	1	1	-0.30904522955573605	-0.6226553801660091	-4.49153764583813	1.03236834404419e-05	0.0020184275937984	3.1787378502815495	downregulate
MIMAT0004799	hsa-miR-589-5p	MDM2	4193.0	ENSG00000135679	0	0	1	1	1	-0.30904522955573605	-0.6226553801660091	-4.49153764583813	1.03236834404419e-05	0.0020184275937984	3.1787378502815495	downregulate
MIMAT0000416	hsa-miR-1-3p	MFHAS1	9258.0	ENSG00000147324	0	0	1	1	1	-0.29687314511214397	0.925655999058445	-3.10711663104194	0.00208199091543744	0.0344687028250123	-1.57822629739748	downregulate
MIMAT0000424	hsa-miR-128-3p	MFHAS1	9258.0	ENSG00000147324	0	0	1	1	1	-0.29687314511214397	0.925655999058445	-3.10711663104194	0.00208199091543744	0.0344687028250123	-1.57822629739748	downregulate
MIMAT0000449	hsa-miR-146a-5p	MFHAS1	9258.0	ENSG00000147324	0	0	1	1	1	-0.29687314511214397	0.925655999058445	-3.10711663104194	0.00208199091543744	0.0344687028250123	-1.57822629739748	downregulate
MIMAT0000455	hsa-miR-185-5p	MFHAS1	9258.0	ENSG00000147324	0	0	1	1	1	-0.29687314511214397	0.925655999058445	-3.10711663104194	0.00208199091543744	0.0344687028250123	-1.57822629739748	downregulate
MIMAT0003298	hsa-miR-629-3p	MFHAS1	9258.0	ENSG00000147324	0	0	1	1	1	-0.29687314511214397	0.925655999058445	-3.10711663104194	0.00208199091543744	0.0344687028250123	-1.57822629739748	downregulate
MIMAT0000088	hsa-miR-30a-3p	MORC4	79710.0	ENSG00000133131	0	0	1	1	1	-0.325472924779508	0.47664947856730894	-3.7070847909074502	0.000252375487336889	0.0115390119811559	0.291588501077099	downregulate
MIMAT0000455	hsa-miR-185-5p	MORC4	79710.0	ENSG00000133131	0	2	0	1	1	-0.325472924779508	0.47664947856730894	-3.7070847909074502	0.000252375487336889	0.0115390119811559	0.291588501077099	downregulate
MIMAT0004500	hsa-miR-26b-3p	MORC4	79710.0	ENSG00000133131	0	0	1	1	1	-0.325472924779508	0.47664947856730894	-3.7070847909074502	0.000252375487336889	0.0115390119811559	0.291588501077099	downregulate
MIMAT0000416	hsa-miR-1-3p	MRPL42	28977.0	ENSG00000198015	0	0	2	1	1	-0.220906200040685	0.41377330885683095	-3.9812746385897304	8.72713374497402e-05	0.006685049576513871	1.2451415537906698	downregulate
MIMAT0000424	hsa-miR-128-3p	MRPL42	28977.0	ENSG00000198015	0	0	1	1	1	-0.220906200040685	0.41377330885683095	-3.9812746385897304	8.72713374497402e-05	0.006685049576513871	1.2451415537906698	downregulate
MIMAT0003298	hsa-miR-629-3p	MRPL42	28977.0	ENSG00000198015	0	0	1	1	1	-0.220906200040685	0.41377330885683095	-3.9812746385897304	8.72713374497402e-05	0.006685049576513871	1.2451415537906698	downregulate
MIMAT0004584	hsa-let-7g-3p	MRPL42	28977.0	ENSG00000198015	0	0	1	1	1	-0.220906200040685	0.41377330885683095	-3.9812746385897304	8.72713374497402e-05	0.006685049576513871	1.2451415537906698	downregulate
MIMAT0000416	hsa-miR-1-3p	MRPS27	23107.0	ENSG00000113048	0	1	1	2	2	-0.25678065177296	0.346942868242901	-4.94261020785427	1.32449021021225e-06	0.000545734013291963	5.05375604515118	downregulate
MIMAT0000424	hsa-miR-128-3p	MRPS27	23107.0	ENSG00000113048	0	1	0	1	1	-0.25678065177296	0.346942868242901	-4.94261020785427	1.32449021021225e-06	0.000545734013291963	5.05375604515118	downregulate
MIMAT0003298	hsa-miR-629-3p	MRPS27	23107.0	ENSG00000113048	0	1	0	1	1	-0.25678065177296	0.346942868242901	-4.94261020785427	1.32449021021225e-06	0.000545734013291963	5.05375604515118	downregulate
MIMAT0004550	hsa-miR-30c-2-3p	MYH11	4629.0	ENSG00000133392	0	1	0	1	1	0.921865079934298	1.12644249244086	3.35019077994008	0.0009176726110607289	0.0223739917250186	-0.85711838388923	upregulate
MIMAT0004550	hsa-miR-30c-2-3p	MYH11	4629.0	ENSG00000276480	0	1	0	1	1	0.921865079934298	1.12644249244086	3.35019077994008	0.0009176726110607289	0.0223739917250186	-0.85711838388923	upregulate
MIMAT0026477	hsa-miR-128-1-5p	MYH11	4629.0	ENSG00000133392	0	1	0	1	1	0.921865079934298	1.12644249244086	3.35019077994008	0.0009176726110607289	0.0223739917250186	-0.85711838388923	upregulate
MIMAT0026477	hsa-miR-128-1-5p	MYH11	4629.0	ENSG00000276480	0	1	0	1	1	0.921865079934298	1.12644249244086	3.35019077994008	0.0009176726110607289	0.0223739917250186	-0.85711838388923	upregulate
MIMAT0000416	hsa-miR-1-3p	NDUFA12	55967.0	ENSG00000184752	0	0	1	1	1	-0.235005400697129	0.25572629452317996	-4.476912760467441	1.10059673216915e-05	0.00206446897223716	3.12050540735987	downregulate
MIMAT0003257	hsa-miR-550a-3p	NDUFA12	55967.0	ENSG00000184752	0	0	1	1	1	-0.235005400697129	0.25572629452317996	-4.476912760467441	1.10059673216915e-05	0.00206446897223716	3.12050540735987	downregulate
MIMAT0003298	hsa-miR-629-3p	NDUFA12	55967.0	ENSG00000184752	0	0	1	1	1	-0.235005400697129	0.25572629452317996	-4.476912760467441	1.10059673216915e-05	0.00206446897223716	3.12050540735987	downregulate
MIMAT0004569	hsa-miR-222-5p	NDUFA12	55967.0	ENSG00000184752	0	0	1	1	1	-0.235005400697129	0.25572629452317996	-4.476912760467441	1.10059673216915e-05	0.00206446897223716	3.12050540735987	downregulate
MIMAT0003257	hsa-miR-550a-3p	NEK4	6787.0	ENSG00000114904	0	0	1	1	1	-0.21285136810821398	0.104068779877517	-4.58660194513065	6.78327459509173e-06	0.00156464993441166	3.5612264002016496	downregulate
MIMAT0004500	hsa-miR-26b-3p	NEK4	6787.0	ENSG00000114904	0	0	1	1	1	-0.21285136810821398	0.104068779877517	-4.58660194513065	6.78327459509173e-06	0.00156464993441166	3.5612264002016496	downregulate
MIMAT0003298	hsa-miR-629-3p	NKD2	85409.0	ENSG00000145506	0	0	1	1	1	0.554788701577905	1.72193972425975	2.8783695556730002	0.00430328259336809	0.0499894916649067	-2.21058412383373	upregulate
MIMAT0004494	hsa-miR-21-3p	NKD2	85409.0	ENSG00000145506	0	0	1	1	1	0.554788701577905	1.72193972425975	2.8783695556730002	0.00430328259336809	0.0499894916649067	-2.21058412383373	upregulate
MIMAT0000088	hsa-miR-30a-3p	NPTX1	4884.0	ENSG00000171246	0	0	1	1	1	0.908497750563759	-1.81562105146855	3.9015864521257697	0.000119564629547149	0.0078170136304886	0.9617421793058321	upregulate
MIMAT0000416	hsa-miR-1-3p	NPTX1	4884.0	ENSG00000171246	0	0	1	1	1	0.908497750563759	-1.81562105146855	3.9015864521257697	0.000119564629547149	0.0078170136304886	0.9617421793058321	upregulate
MIMAT0000424	hsa-miR-128-3p	NPTX1	4884.0	ENSG00000171246	0	0	1	1	1	0.908497750563759	-1.81562105146855	3.9015864521257697	0.000119564629547149	0.0078170136304886	0.9617421793058321	upregulate
MIMAT0000427	hsa-miR-133a-3p	NPTX1	4884.0	ENSG00000171246	0	0	1	1	1	0.908497750563759	-1.81562105146855	3.9015864521257697	0.000119564629547149	0.0078170136304886	0.9617421793058321	upregulate
MIMAT0004494	hsa-miR-21-3p	NPTX1	4884.0	ENSG00000171246	0	0	1	1	1	0.908497750563759	-1.81562105146855	3.9015864521257697	0.000119564629547149	0.0078170136304886	0.9617421793058321	upregulate
MIMAT0004584	hsa-let-7g-3p	NPTX1	4884.0	ENSG00000171246	0	0	1	1	1	0.908497750563759	-1.81562105146855	3.9015864521257697	0.000119564629547149	0.0078170136304886	0.9617421793058321	upregulate
MIMAT0005920	hsa-miR-1266-5p	PALM2	114299.0		0	1	0	1	1	0.6680436462395329	-0.7089522291825171	4.91945086700541	1.47721991030278e-06	0.0005642615269429571	4.95381875520393	upregulate
MIMAT0000416	hsa-miR-1-3p	PCNA	5111.0	ENSG00000132646	0	0	1	1	1	-0.24227459520435002	0.7670856378287659	-3.00502499813486	0.0028943728735886603	0.0411486016079651	-1.8660370620903	downregulate
MIMAT0003298	hsa-miR-629-3p	PCNA	5111.0	ENSG00000132646	0	0	1	1	1	-0.24227459520435002	0.7670856378287659	-3.00502499813486	0.0028943728735886603	0.0411486016079651	-1.8660370620903	downregulate
MIMAT0004569	hsa-miR-222-5p	PCNA	5111.0	ENSG00000132646	0	1	0	1	1	-0.24227459520435002	0.7670856378287659	-3.00502499813486	0.0028943728735886603	0.0411486016079651	-1.8660370620903	downregulate
MIMAT0000088	hsa-miR-30a-3p	PCSK2	5126.0	ENSG00000125851	0	2	0	1	1	0.486745731707364	-2.59824784537866	3.02782833528511	0.00269106590074597	0.0395228616289347	-1.8025294946464399	upregulate
MIMAT0005920	hsa-miR-1266-5p	PCSK2	5126.0	ENSG00000125851	0	4	0	1	1	0.486745731707364	-2.59824784537866	3.02782833528511	0.00269106590074597	0.0395228616289347	-1.8025294946464399	upregulate
MIMAT0026477	hsa-miR-128-1-5p	PER1	5187.0	ENSG00000179094	0	1	0	1	1	0.463989506045694	-1.60790975148891	4.0393490039829905	6.91580429580789e-05	0.00604147005909107	1.4548784605945801	upregulate
MIMAT0000424	hsa-miR-128-3p	PLAG1	5324.0	ENSG00000181690	0	1	1	2	2	0.9859745798320579	-0.6469751879233371	5.345271414325981	1.8657759219100198e-07	0.000225308905299358	6.852854316227269	upregulate
MIMAT0000088	hsa-miR-30a-3p	PLAG1	5324.0	ENSG00000181690	0	0	1	1	1	0.9859745798320579	-0.6469751879233371	5.345271414325981	1.8657759219100198e-07	0.000225308905299358	6.852854316227269	upregulate
MIMAT0000449	hsa-miR-146a-5p	PLAG1	5324.0	ENSG00000181690	0	0	2	1	1	0.9859745798320579	-0.6469751879233371	5.345271414325981	1.8657759219100198e-07	0.000225308905299358	6.852854316227269	upregulate
MIMAT0004799	hsa-miR-589-5p	PLAG1	5324.0	ENSG00000181690	0	0	1	1	1	0.9859745798320579	-0.6469751879233371	5.345271414325981	1.8657759219100198e-07	0.000225308905299358	6.852854316227269	upregulate
MIMAT0000416	hsa-miR-1-3p	PPL	5493.0	ENSG00000118898	0	0	2	1	1	0.487491571018651	-0.12338396029936399	4.400824617072599	1.5313546897489e-05	0.00261976503548793	2.82018485624892	upregulate
MIMAT0004601	hsa-miR-145-3p	PPL	5493.0	ENSG00000118898	0	0	1	1	1	0.487491571018651	-0.12338396029936399	4.400824617072599	1.5313546897489e-05	0.00261976503548793	2.82018485624892	upregulate
MIMAT0004500	hsa-miR-26b-3p	PRKAA2	5563.0	ENSG00000162409	0	1	1	2	2	1.18251089362589	-3.0773822167895903	4.3415851515380695	1.9743086057616e-05	0.0030366972088226897	2.58945035254105	upregulate
MIMAT0000427	hsa-miR-133a-3p	PRKAA2	5563.0	ENSG00000162409	0	0	1	1	1	1.18251089362589	-3.0773822167895903	4.3415851515380695	1.9743086057616e-05	0.0030366972088226897	2.58945035254105	upregulate
MIMAT0004569	hsa-miR-222-5p	PRKAA2	5563.0	ENSG00000162409	0	0	1	1	1	1.18251089362589	-3.0773822167895903	4.3415851515380695	1.9743086057616e-05	0.0030366972088226897	2.58945035254105	upregulate
MIMAT0000427	hsa-miR-133a-3p	PSMB9	5698.0	ENSG00000242711	0	0	1	1	1	-0.348199036687078	0.715108702669712	-2.9229748485137796	0.0037480368038752205	0.0468310697180489	-2.09082920330906	downregulate
MIMAT0000449	hsa-miR-146a-5p	PSMB9	5698.0	ENSG00000242711	0	0	1	1	1	-0.348199036687078	0.715108702669712	-2.9229748485137796	0.0037480368038752205	0.0468310697180489	-2.09082920330906	downregulate
MIMAT0003257	hsa-miR-550a-3p	PSMB9	5698.0	ENSG00000239836	0	1	0	1	1	-0.348199036687078	0.715108702669712	-2.9229748485137796	0.0037480368038752205	0.0468310697180489	-2.09082920330906	downregulate
MIMAT0003257	hsa-miR-550a-3p	PSMB9	5698.0	ENSG00000240065	0	1	0	1	1	-0.348199036687078	0.715108702669712	-2.9229748485137796	0.0037480368038752205	0.0468310697180489	-2.09082920330906	downregulate
MIMAT0003257	hsa-miR-550a-3p	PSMB9	5698.0	ENSG00000240118	0	1	0	1	1	-0.348199036687078	0.715108702669712	-2.9229748485137796	0.0037480368038752205	0.0468310697180489	-2.09082920330906	downregulate
MIMAT0003257	hsa-miR-550a-3p	PSMB9	5698.0	ENSG00000240508	0	1	0	1	1	-0.348199036687078	0.715108702669712	-2.9229748485137796	0.0037480368038752205	0.0468310697180489	-2.09082920330906	downregulate
MIMAT0003257	hsa-miR-550a-3p	PSMB9	5698.0	ENSG00000242711	0	1	0	1	1	-0.348199036687078	0.715108702669712	-2.9229748485137796	0.0037480368038752205	0.0468310697180489	-2.09082920330906	downregulate
MIMAT0003257	hsa-miR-550a-3p	PSMB9	5698.0	ENSG00000243067	0	1	0	1	1	-0.348199036687078	0.715108702669712	-2.9229748485137796	0.0037480368038752205	0.0468310697180489	-2.09082920330906	downregulate
MIMAT0003257	hsa-miR-550a-3p	PSMB9	5698.0	ENSG00000243594	0	1	0	1	1	-0.348199036687078	0.715108702669712	-2.9229748485137796	0.0037480368038752205	0.0468310697180489	-2.09082920330906	downregulate
MIMAT0003257	hsa-miR-550a-3p	PSMB9	5698.0	ENSG00000243958	0	1	0	1	1	-0.348199036687078	0.715108702669712	-2.9229748485137796	0.0037480368038752205	0.0468310697180489	-2.09082920330906	downregulate
MIMAT0004494	hsa-miR-21-3p	PSMB9	5698.0	ENSG00000242711	0	0	1	1	1	-0.348199036687078	0.715108702669712	-2.9229748485137796	0.0037480368038752205	0.0468310697180489	-2.09082920330906	downregulate
MIMAT0000424	hsa-miR-128-3p	PYGO1	26108.0	ENSG00000171016	0	1	1	2	2	0.43332844845277296	-1.74346168610573	3.0116944204740097	0.00283349817450231	0.0406388279510926	-1.8475090582981297	upregulate
MIMAT0004500	hsa-miR-26b-3p	PYGO1	26108.0	ENSG00000171016	0	0	1	1	1	0.43332844845277296	-1.74346168610573	3.0116944204740097	0.00283349817450231	0.0406388279510926	-1.8475090582981297	upregulate
MIMAT0000449	hsa-miR-146a-5p	SCARF2	91179.0	ENSG00000244486	0	0	2	1	1	0.503473949579819	-0.683489086992456	3.0450556907551496	0.00254626479290408	0.0385353829349765	-1.7542538402486798	upregulate
MIMAT0004799	hsa-miR-589-5p	SCARF2	91179.0	ENSG00000244486	0	0	1	1	1	0.503473949579819	-0.683489086992456	3.0450556907551496	0.00254626479290408	0.0385353829349765	-1.7542538402486798	upregulate
MIMAT0000416	hsa-miR-1-3p	SERPINE1	5054.0	ENSG00000106366	0	0	1	1	1	0.644326788276201	-0.724569080291239	3.62080441670304	0.000348113362362976	0.0132193363220878	0.00420522653287048	upregulate
MIMAT0000424	hsa-miR-128-3p	SERPINE1	5054.0	ENSG00000106366	0	0	2	1	1	0.644326788276201	-0.724569080291239	3.62080441670304	0.000348113362362976	0.0132193363220878	0.00420522653287048	upregulate
MIMAT0000427	hsa-miR-133a-3p	SERPINE1	5054.0	ENSG00000106366	0	0	1	1	1	0.644326788276201	-0.724569080291239	3.62080441670304	0.000348113362362976	0.0132193363220878	0.00420522653287048	upregulate
MIMAT0004494	hsa-miR-21-3p	SERPINE1	5054.0	ENSG00000106366	0	0	1	1	1	0.644326788276201	-0.724569080291239	3.62080441670304	0.000348113362362976	0.0132193363220878	0.00420522653287048	upregulate
MIMAT0004799	hsa-miR-589-5p	SERPINE1	5054.0	ENSG00000106366	0	0	1	1	1	0.644326788276201	-0.724569080291239	3.62080441670304	0.000348113362362976	0.0132193363220878	0.00420522653287048	upregulate
MIMAT0000416	hsa-miR-1-3p	SERPINE2	5270.0	ENSG00000135919	0	0	1	1	1	0.47279919040817797	0.5007586061198951	3.2783226722978105	0.0011751523868568099	0.0258571311358879	-1.0755468714012502	upregulate
MIMAT0000424	hsa-miR-128-3p	SERPINE2	5270.0	ENSG00000135919	0	0	1	1	1	0.47279919040817797	0.5007586061198951	3.2783226722978105	0.0011751523868568099	0.0258571311358879	-1.0755468714012502	upregulate
MIMAT0000427	hsa-miR-133a-3p	SERPINE2	5270.0	ENSG00000135919	0	0	1	1	1	0.47279919040817797	0.5007586061198951	3.2783226722978105	0.0011751523868568099	0.0258571311358879	-1.0755468714012502	upregulate
MIMAT0000455	hsa-miR-185-5p	SERPINE2	5270.0	ENSG00000135919	0	0	1	1	1	0.47279919040817797	0.5007586061198951	3.2783226722978105	0.0011751523868568099	0.0258571311358879	-1.0755468714012502	upregulate
MIMAT0004569	hsa-miR-222-5p	SERPINE2	5270.0	ENSG00000135919	0	0	1	1	1	0.47279919040817797	0.5007586061198951	3.2783226722978105	0.0011751523868568099	0.0258571311358879	-1.0755468714012502	upregulate
MIMAT0004799	hsa-miR-589-5p	SERPINE2	5270.0	ENSG00000135919	0	0	1	1	1	0.47279919040817797	0.5007586061198951	3.2783226722978105	0.0011751523868568099	0.0258571311358879	-1.0755468714012502	upregulate
MIMAT0000416	hsa-miR-1-3p	SLC2A1	6513.0	ENSG00000117394	0	0	1	1	1	0.425540372002458	0.666866951465887	3.34636027102899	0.000929949016001766	0.0225394608612754	-0.868870433472876	upregulate
MIMAT0004550	hsa-miR-30c-2-3p	SLC2A1	6513.0	ENSG00000117394	0	0	1	1	1	0.425540372002458	0.666866951465887	3.34636027102899	0.000929949016001766	0.0225394608612754	-0.868870433472876	upregulate
MIMAT0004799	hsa-miR-589-5p	SLC2A1	6513.0	ENSG00000117394	0	0	1	1	1	0.425540372002458	0.666866951465887	3.34636027102899	0.000929949016001766	0.0225394608612754	-0.868870433472876	upregulate
MIMAT0003298	hsa-miR-629-3p	SLIT1	6585.0	ENSG00000187122	0	1	0	1	1	0.6227831779056221	-1.8781693698481003	3.5705582957415403	0.000418648984852747	0.0146312449175276	-0.160327562052831	upregulate
MIMAT0003257	hsa-miR-550a-3p	SORBS1	10580.0	ENSG00000095637	0	0	1	1	1	0.470157972945275	0.21802810694204003	3.03252177348489	0.00265088415133697	0.0392302221103035	-1.78940256828947	upregulate
MIMAT0000424	hsa-miR-128-3p	SOX11	6664.0	ENSG00000176887	0	1	1	2	2	0.52360553904496	-0.6721257236628039	3.04388762296086	0.0025558516674059	0.0386085937308137	-1.75753515715656	upregulate
MIMAT0004494	hsa-miR-21-3p	SOX11	6664.0	ENSG00000176887	0	2	1	2	2	0.52360553904496	-0.6721257236628039	3.04388762296086	0.0025558516674059	0.0386085937308137	-1.75753515715656	upregulate
MIMAT0000449	hsa-miR-146a-5p	SOX11	6664.0	ENSG00000176887	0	0	1	1	1	0.52360553904496	-0.6721257236628039	3.04388762296086	0.0025558516674059	0.0386085937308137	-1.75753515715656	upregulate
MIMAT0003257	hsa-miR-550a-3p	SOX11	6664.0	ENSG00000176887	0	0	1	1	1	0.52360553904496	-0.6721257236628039	3.04388762296086	0.0025558516674059	0.0386085937308137	-1.75753515715656	upregulate
MIMAT0003298	hsa-miR-629-3p	SOX11	6664.0	ENSG00000176887	0	0	1	1	1	0.52360553904496	-0.6721257236628039	3.04388762296086	0.0025558516674059	0.0386085937308137	-1.75753515715656	upregulate
MIMAT0004569	hsa-miR-222-5p	SOX11	6664.0	ENSG00000176887	0	0	1	1	1	0.52360553904496	-0.6721257236628039	3.04388762296086	0.0025558516674059	0.0386085937308137	-1.75753515715656	upregulate
MIMAT0000416	hsa-miR-1-3p	SV2A	9900.0	ENSG00000159164	0	0	1	1	1	0.549065848534134	-1.9487402526826	3.72472963917435	0.00023613500889921	0.0110929418711485	0.351112727634667	upregulate
MIMAT0000424	hsa-miR-128-3p	SV2A	9900.0	ENSG00000159164	0	0	1	1	1	0.549065848534134	-1.9487402526826	3.72472963917435	0.00023613500889921	0.0110929418711485	0.351112727634667	upregulate
MIMAT0003298	hsa-miR-629-3p	SV2A	9900.0	ENSG00000159164	0	0	1	1	1	0.549065848534134	-1.9487402526826	3.72472963917435	0.00023613500889921	0.0110929418711485	0.351112727634667	upregulate
MIMAT0004494	hsa-miR-21-3p	SV2A	9900.0	ENSG00000159164	0	0	1	1	1	0.549065848534134	-1.9487402526826	3.72472963917435	0.00023613500889921	0.0110929418711485	0.351112727634667	upregulate
MIMAT0000416	hsa-miR-1-3p	TACSTD2	4070.0	ENSG00000184292	0	0	1	1	1	1.0559166786226402	-1.3839221081169	3.79184981946763	0.000182927213958659	0.00973625724686372	0.579864358540896	upregulate
MIMAT0000449	hsa-miR-146a-5p	TACSTD2	4070.0	ENSG00000184292	0	0	1	1	1	1.0559166786226402	-1.3839221081169	3.79184981946763	0.000182927213958659	0.00973625724686372	0.579864358540896	upregulate
MIMAT0004601	hsa-miR-145-3p	TACSTD2	4070.0	ENSG00000184292	0	0	1	1	1	1.0559166786226402	-1.3839221081169	3.79184981946763	0.000182927213958659	0.00973625724686372	0.579864358540896	upregulate
MIMAT0000416	hsa-miR-1-3p	TIMP2	7077.0	ENSG00000035862	0	0	2	1	1	0.450504657716448	-0.8386153124427921	2.9023056856093103	0.00399663732411011	0.0481213886373351	-2.1465361534486003	upregulate
MIMAT0000449	hsa-miR-146a-5p	TIMP2	7077.0	ENSG00000035862	0	0	1	1	1	0.450504657716448	-0.8386153124427921	2.9023056856093103	0.00399663732411011	0.0481213886373351	-2.1465361534486003	upregulate
MIMAT0000455	hsa-miR-185-5p	TIMP2	7077.0	ENSG00000035862	0	0	1	1	1	0.450504657716448	-0.8386153124427921	2.9023056856093103	0.00399663732411011	0.0481213886373351	-2.1465361534486003	upregulate
MIMAT0004550	hsa-miR-30c-2-3p	TIMP2	7077.0	ENSG00000035862	0	0	1	1	1	0.450504657716448	-0.8386153124427921	2.9023056856093103	0.00399663732411011	0.0481213886373351	-2.1465361534486003	upregulate
MIMAT0004584	hsa-let-7g-3p	TIMP2	7077.0	ENSG00000035862	0	0	1	1	1	0.450504657716448	-0.8386153124427921	2.9023056856093103	0.00399663732411011	0.0481213886373351	-2.1465361534486003	upregulate
MIMAT0004799	hsa-miR-589-5p	TIMP2	7077.0	ENSG00000035862	0	0	1	1	1	0.450504657716448	-0.8386153124427921	2.9023056856093103	0.00399663732411011	0.0481213886373351	-2.1465361534486003	upregulate
MIMAT0000416	hsa-miR-1-3p	TM7SF3	51768.0	ENSG00000064115	0	0	1	1	1	-0.234355016396493	-0.3652611191879179	-3.38891999594171	0.000801752239371412	0.0207294354182062	-0.737602872927596	downregulate
MIMAT0000424	hsa-miR-128-3p	TM7SF3	51768.0	ENSG00000064115	0	0	1	1	1	-0.234355016396493	-0.3652611191879179	-3.38891999594171	0.000801752239371412	0.0207294354182062	-0.737602872927596	downregulate
MIMAT0000427	hsa-miR-133a-3p	TM7SF3	51768.0	ENSG00000064115	0	0	1	1	1	-0.234355016396493	-0.3652611191879179	-3.38891999594171	0.000801752239371412	0.0207294354182062	-0.737602872927596	downregulate
MIMAT0000449	hsa-miR-146a-5p	TM7SF3	51768.0	ENSG00000064115	0	0	1	1	1	-0.234355016396493	-0.3652611191879179	-3.38891999594171	0.000801752239371412	0.0207294354182062	-0.737602872927596	downregulate
MIMAT0004494	hsa-miR-21-3p	TM7SF3	51768.0	ENSG00000064115	0	0	1	1	1	-0.234355016396493	-0.3652611191879179	-3.38891999594171	0.000801752239371412	0.0207294354182062	-0.737602872927596	downregulate
MIMAT0004601	hsa-miR-145-3p	TM7SF3	51768.0	ENSG00000064115	0	0	1	1	1	-0.234355016396493	-0.3652611191879179	-3.38891999594171	0.000801752239371412	0.0207294354182062	-0.737602872927596	downregulate
MIMAT0000427	hsa-miR-133a-3p	TNFRSF11A	8792.0	ENSG00000141655	0	0	1	1	1	-0.4469473508915321	2.6390666941449	-2.9483913523304097	0.00346173636449113	0.0450354789775909	-2.02181905235005	downregulate
MIMAT0003257	hsa-miR-550a-3p	TNFRSF11A	8792.0	ENSG00000141655	0	0	1	1	1	-0.4469473508915321	2.6390666941449	-2.9483913523304097	0.00346173636449113	0.0450354789775909	-2.02181905235005	downregulate
MIMAT0000416	hsa-miR-1-3p	TPI1	7167.0	ENSG00000111669	0	0	1	1	1	-0.20905511887670897	0.32128564116388897	-3.4514943070692	0.000642912429835608	0.0185892243268946	-0.541842010980003	downregulate
MIMAT0004500	hsa-miR-26b-3p	TPI1	7167.0	ENSG00000111669	0	1	0	1	1	-0.20905511887670897	0.32128564116388897	-3.4514943070692	0.000642912429835608	0.0185892243268946	-0.541842010980003	downregulate
MIMAT0004550	hsa-miR-30c-2-3p	TPI1	7167.0	ENSG00000111669	0	1	0	1	1	-0.20905511887670897	0.32128564116388897	-3.4514943070692	0.000642912429835608	0.0185892243268946	-0.541842010980003	downregulate
MIMAT0000424	hsa-miR-128-3p	TPPP	11076.0	ENSG00000171368	0	1	1	2	2	0.59921311231834	-0.5691368098071511	3.27354222792981	0.00119446328585582	0.0261791170986371	-1.08992113351742	upregulate
MIMAT0000416	hsa-miR-1-3p	TPPP	11076.0	ENSG00000171368	0	0	1	1	1	0.59921311231834	-0.5691368098071511	3.27354222792981	0.00119446328585582	0.0261791170986371	-1.08992113351742	upregulate
MIMAT0000449	hsa-miR-146a-5p	TPPP	11076.0	ENSG00000171368	0	0	1	1	1	0.59921311231834	-0.5691368098071511	3.27354222792981	0.00119446328585582	0.0261791170986371	-1.08992113351742	upregulate
MIMAT0004569	hsa-miR-222-5p	TPPP	11076.0	ENSG00000171368	0	0	1	1	1	0.59921311231834	-0.5691368098071511	3.27354222792981	0.00119446328585582	0.0261791170986371	-1.08992113351742	upregulate
MIMAT0000416	hsa-miR-1-3p	TRIAP1	51499.0	ENSG00000170855	0	0	1	1	1	-0.227773022135891	0.255697379589161	-4.1792618160235095	3.90556027943716e-05	0.0043812703265882795	1.9711789689857098	downregulate
MIMAT0003257	hsa-miR-550a-3p	TRIAP1	51499.0	ENSG00000170855	0	0	1	1	1	-0.227773022135891	0.255697379589161	-4.1792618160235095	3.90556027943716e-05	0.0043812703265882795	1.9711789689857098	downregulate
MIMAT0000416	hsa-miR-1-3p	TXNL1	9352.0	ENSG00000091164	0	0	1	1	1	-0.21176671449076898	-0.196316318608587	-4.1227181206776	4.92924892492399e-05	0.00503445528257535	1.76065942716811	downregulate
MIMAT0000449	hsa-miR-146a-5p	TXNL1	9352.0	ENSG00000091164	0	0	2	1	1	-0.21176671449076898	-0.196316318608587	-4.1227181206776	4.92924892492399e-05	0.00503445528257535	1.76065942716811	downregulate
MIMAT0003257	hsa-miR-550a-3p	TXNL1	9352.0	ENSG00000091164	0	0	1	1	1	-0.21176671449076898	-0.196316318608587	-4.1227181206776	4.92924892492399e-05	0.00503445528257535	1.76065942716811	downregulate
MIMAT0000449	hsa-miR-146a-5p	UTP15	84135.0	ENSG00000164338	0	1	1	2	2	-0.207160355605673	0.311982143358765	-4.15726224471327	4.27707963553629e-05	0.00467043445946406	1.88897222587381	downregulate
MIMAT0000088	hsa-miR-30a-3p	UTP15	84135.0	ENSG00000164338	0	0	1	1	1	-0.207160355605673	0.311982143358765	-4.15726224471327	4.27707963553629e-05	0.00467043445946406	1.88897222587381	downregulate
MIMAT0000416	hsa-miR-1-3p	UTP15	84135.0	ENSG00000164338	0	0	1	1	1	-0.207160355605673	0.311982143358765	-4.15726224471327	4.27707963553629e-05	0.00467043445946406	1.88897222587381	downregulate
MIMAT0004500	hsa-miR-26b-3p	UTP15	84135.0	ENSG00000164338	0	0	1	1	1	-0.207160355605673	0.311982143358765	-4.15726224471327	4.27707963553629e-05	0.00467043445946406	1.88897222587381	downregulate
MIMAT0000088	hsa-miR-30a-3p	XPO7	23039.0	ENSG00000130227	0	0	1	1	1	-0.25111271777042	-0.18299513021012	-4.00286193818079	8.00669402550606e-05	0.00639466474338431	1.32279009095744	downregulate
MIMAT0000416	hsa-miR-1-3p	XPO7	23039.0	ENSG00000130227	0	0	1	1	1	-0.25111271777042	-0.18299513021012	-4.00286193818079	8.00669402550606e-05	0.00639466474338431	1.32279009095744	downregulate
MIMAT0004799	hsa-miR-589-5p	XPO7	23039.0	ENSG00000130227	0	0	1	1	1	-0.25111271777042	-0.18299513021012	-4.00286193818079	8.00669402550606e-05	0.00639466474338431	1.32279009095744	downregulate
MIMAT0004799	hsa-miR-589-5p	YARS2	51067.0	ENSG00000139131	0	0	1	1	1	-0.202395434515202	0.521476798225233	-3.4917309709564304	0.000556873148987393	0.0169113149046778	-0.41423302305413107	downregulate
MIMAT0000449	hsa-miR-146a-5p	ZNF117	51351.0	ENSG00000152926	0	1	0	1	1	0.416671402951979	-0.7569666415674301	3.26636370802375	0.00122401557742853	0.0263974089646441	-1.1114697689683501	upregulate
MIMAT0004567	hsa-miR-219a-1-3p	ZNF117	51351.0	ENSG00000152926	0	1	0	1	1	0.416671402951979	-0.7569666415674301	3.26636370802375	0.00122401557742853	0.0263974089646441	-1.1114697689683501	upregulate
MIMAT0004584	hsa-let-7g-3p	ZNF117	51351.0	ENSG00000152926	0	1	0	1	1	0.416671402951979	-0.7569666415674301	3.26636370802375	0.00122401557742853	0.0263974089646441	-1.1114697689683501	upregulate
MIMAT0003298	hsa-miR-629-3p	ZNF135	7694.0	ENSG00000176293	0	0	1	1	1	0.4873286687851	-2.28752335064809	3.2061561957180698	0.00149996209375592	0.0288006287324248	-1.29048005440078	upregulate
MIMAT0003298	hsa-miR-629-3p	ZNF423	23090.0	ENSG00000102935	0	0	1	1	1	0.577157147981606	-0.7418548237303481	3.34479342501441	0.000935014548386019	0.022608850016274	-0.873673973314046	upregulate
MIMAT0004494	hsa-miR-21-3p	ZNF423	23090.0	ENSG00000102935	0	0	1	1	1	0.577157147981606	-0.7418548237303481	3.34479342501441	0.000935014548386019	0.022608850016274	-0.873673973314046	upregulate
MIMAT0000424	hsa-miR-128-3p	ZNF512B	57473.0	ENSG00000196700	0	0	1	1	1	0.5065325015372449	-2.99352168613305	3.77948098335661	0.000191791863711868	0.009809639735203329	0.5374341500464149	upregulate
MIMAT0000427	hsa-miR-133a-3p	ZNF512B	57473.0	ENSG00000196700	0	0	1	1	1	0.5065325015372449	-2.99352168613305	3.77948098335661	0.000191791863711868	0.009809639735203329	0.5374341500464149	upregulate
MIMAT0000449	hsa-miR-146a-5p	ZNF512B	57473.0	ENSG00000196700	0	0	1	1	1	0.5065325015372449	-2.99352168613305	3.77948098335661	0.000191791863711868	0.009809639735203329	0.5374341500464149	upregulate
MIMAT0000455	hsa-miR-185-5p	ZNF512B	57473.0	ENSG00000196700	0	1	0	1	1	0.5065325015372449	-2.99352168613305	3.77948098335661	0.000191791863711868	0.009809639735203329	0.5374341500464149	upregulate
MIMAT0003298	hsa-miR-629-3p	ZNF512B	57473.0	ENSG00000196700	0	0	1	1	1	0.5065325015372449	-2.99352168613305	3.77948098335661	0.000191791863711868	0.009809639735203329	0.5374341500464149	upregulate
MIMAT0004550	hsa-miR-30c-2-3p	ZNF512B	57473.0	ENSG00000196700	0	0	1	1	1	0.5065325015372449	-2.99352168613305	3.77948098335661	0.000191791863711868	0.009809639735203329	0.5374341500464149	upregulate
