# Supplementary material for: Identification of candidate genes encoding tumor-specific neoantigens in early- and late-stage colon adenocarcinoma
Source: Aging (Albany NY). 2021 Jan 10;13(3):4024–44. doi: 10.18632/aging.202370 (PMC7906157; doi:10.18632/aging.202370)
Supplement: Supplementary Table 2 [file aging-13-202370-s002.xlsx]

## Sheet: neoantigen_NvsE
Supplementary Table 2. Variant information of recurrent somatic mutations.
SYMBOL	Chromosome	Start_Position	Variant_Classification	HGVSp	Transcript_ID	Consequence	Amino_acids	Codons	IMPACT	VARIANT_CLASS
NEB	chr2	151684877.0	Silent	p.=	ENST00000172853	synonymous_variant	A	gcC/gcT	LOW	SNV
NEB	chr2	151633782.0	Intron		ENST00000172853	intron_variant			MODIFIER	SNV
NEB	chr2	151568357.0	Frame_Shift_Del	p.Leu4198CysfsTer51	ENST00000172853	frameshift_variant	L/X	Ctg/tg	HIGH	deletion
NEB	chr2	151545962.0	Nonsense_Mutation	p.Arg5134Ter	ENST00000172853	stop_gained	R/*	Cga/Tga	HIGH	SNV
NEB	chr2	151733145.0	Silent	p.=	ENST00000172853	synonymous_variant	D	gaC/gaT	LOW	SNV
NEB	chr2	151494161.0	Splice_Region	p.=	ENST00000172853	splice_region_variant;synonymous_variant	S	tcG/tcT	LOW	SNV
NEB	chr2	151518368.0	Missense_Mutation	p.Asp5883Asn	ENST00000172853	missense_variant	D/N	Gat/Aat	MODERATE	SNV
NEB	chr2	151519753.0	Missense_Mutation	p.Asn5798His	ENST00000172853	missense_variant	N/H	Aat/Cat	MODERATE	SNV
NEB	chr2	151534229.0	Missense_Mutation	p.Asp5434Asn	ENST00000172853	missense_variant	D/N	Gac/Aac	MODERATE	SNV
NEB	chr2	151570142.0	Missense_Mutation	p.Thr4089Ile	ENST00000172853	missense_variant	T/I	aCc/aTc	MODERATE	SNV
NEB	chr2	151656412.0	Missense_Mutation	p.Arg2079His	ENST00000172853	missense_variant	R/H	cGc/cAc	MODERATE	SNV
NEB	chr2	151666350.0	Missense_Mutation	p.Leu1591Ile	ENST00000172853	missense_variant	L/I	Ctc/Atc	MODERATE	SNV
NEB	chr2	151672552.0	Missense_Mutation	p.Lys1372Asn	ENST00000172853	missense_variant	K/N	aaG/aaT	MODERATE	SNV
NEB	chr2	151687695.0	Missense_Mutation	p.Lys818Asn	ENST00000172853	missense_variant	K/N	aaG/aaT	MODERATE	SNV
NEB	chr2	151694370.0	Missense_Mutation	p.Asp617Asn	ENST00000172853	missense_variant	D/N	Gat/Aat	MODERATE	SNV
NEB	chr2	151671141.0	Missense_Mutation	p.Ala1463Val	ENST00000172853	missense_variant	A/V	gCa/gTa	MODERATE	SNV
NEB	chr2	151672417.0	Silent	p.=	ENST00000172853	synonymous_variant	D	gaC/gaT	LOW	SNV
NEB	chr2	151659162.0	Missense_Mutation	p.Tyr1993Phe	ENST00000172853	missense_variant	Y/F	tAc/tTc	MODERATE	SNV
NEB	chr2	151546356.0	Missense_Mutation	p.Arg5118Trp	ENST00000172853	missense_variant	R/W	Cgg/Tgg	MODERATE	SNV
NEB	chr2	151570313.0	Missense_Mutation	p.Arg4032Leu	ENST00000172853	missense_variant	R/L	cGc/cTc	MODERATE	SNV
NEB	chr2	151537963.0	Missense_Mutation	p.Glu5303Val	ENST00000172853	missense_variant	E/V	gAg/gTg	MODERATE	SNV
NEB	chr2	151633935.0	Intron		ENST00000172853	intron_variant			MODIFIER	SNV
NEB	chr2	151532098.0	Intron		ENST00000172853	intron_variant			MODIFIER	deletion
NEB	chr2	151618297.0	Frame_Shift_Del	p.Asn3442ThrfsTer4	ENST00000172853	frameshift_variant	N/X	aAc/ac	HIGH	deletion
NEB	chr2	151640634.0	Silent	p.=	ENST00000172853	synonymous_variant	L	ctC/ctT	LOW	SNV
NEB	chr2	151656259.0	Missense_Mutation	p.Ala2130Val	ENST00000172853	missense_variant	A/V	gCc/gTc	MODERATE	SNV
NEB	chr2	151662328.0	Missense_Mutation	p.Ala1926Val	ENST00000172853	missense_variant	A/V	gCt/gTt	MODERATE	SNV
NEB	chr2	151687458.0	Missense_Mutation	p.Lys866Asn	ENST00000172853	missense_variant	K/N	aaG/aaT	MODERATE	SNV
NEB	chr2	151519748.0	Silent	p.=	ENST00000172853	synonymous_variant	F	ttC/ttT	LOW	SNV
NEB	chr2	151568069.0	Splice_Site		ENST00000172853	splice_donor_variant			HIGH	SNV
NEB	chr2	151614516.0	Silent	p.=	ENST00000172853	synonymous_variant	P	ccG/ccA	LOW	SNV
NEB	chr2	151656335.0	Missense_Mutation	p.Asn2105Asp	ENST00000172853	missense_variant	N/D	Aac/Gac	MODERATE	SNV
NEB	chr2	151677699.0	Missense_Mutation	p.Glu1214Lys	ENST00000172853	missense_variant	E/K	Gaa/Aaa	MODERATE	SNV
NEB	chr2	151694421.0	Missense_Mutation	p.Asp600Tyr	ENST00000172853	missense_variant	D/Y	Gac/Tac	MODERATE	SNV
NEB	chr2	151695634.0	Missense_Mutation	p.Pro540Ser	ENST00000172853	missense_variant	P/S	Ccc/Tcc	MODERATE	SNV
NEB	chr2	151485767.0	Missense_Mutation	p.Ala6668Val	ENST00000172853	missense_variant	A/V	gCt/gTt	MODERATE	SNV
NEB	chr2	151492476.0	Missense_Mutation	p.Phe6406Leu	ENST00000172853	missense_variant	F/L	Ttc/Ctc	MODERATE	SNV
NEB	chr2	151694435.0	Missense_Mutation	p.Val595Ala	ENST00000172853	missense_variant;splice_region_variant	V/A	gTg/gCg	MODERATE	SNV
NEB	chr2	151696736.0	Splice_Site		ENST00000172853	splice_acceptor_variant			HIGH	SNV
NEB	chr2	151499432.0	Intron		ENST00000172853	intron_variant			MODIFIER	SNV
NEB	chr2	151553416.0	Silent	p.=	ENST00000172853	synonymous_variant	A	gcT/gcG	LOW	SNV
NEB	chr2	151610039.0	Missense_Mutation	p.Cys3791Arg	ENST00000172853	missense_variant	C/R	Tgt/Cgt	MODERATE	SNV
NEB	chr2	151655281.0	Silent	p.=	ENST00000172853	synonymous_variant	L	Ctg/Ttg	LOW	SNV
NEB	chr2	151692151.0	Missense_Mutation	p.Leu672Val	ENST00000172853	missense_variant	L/V	Tta/Gta	MODERATE	SNV
NEB	chr2	151614283.0	Missense_Mutation	p.Gln3622Arg	ENST00000172853	missense_variant	Q/R	cAg/cGg	MODERATE	SNV
NEB	chr2	151665387.0	Silent	p.=	ENST00000172853	synonymous_variant	A	gcC/gcT	LOW	SNV
NEB	chr2	151627526.0	Silent	p.=	ENST00000172853	synonymous_variant	S	agC/agT	LOW	SNV
NEB	chr2	151524615.0	Missense_Mutation	p.Val5724Ala	ENST00000172853	missense_variant;splice_region_variant	V/A	gTc/gCc	MODERATE	SNV
NEB	chr2	151579454.0	Intron		ENST00000172853	intron_variant			MODIFIER	SNV
NEB	chr2	151665435.0	Missense_Mutation	p.Ser1712Arg	ENST00000172853	missense_variant	S/R	agT/agG	MODERATE	SNV
NEB	chr2	151671155.0	Missense_Mutation	p.Glu1458Asp	ENST00000172853	missense_variant	E/D	gaG/gaT	MODERATE	SNV
NEB	chr2	151678073.0	Missense_Mutation	p.Arg1124Trp	ENST00000172853	missense_variant	R/W	Cgg/Tgg	MODERATE	SNV
NEB	chr2	151723434.0	Missense_Mutation	p.Asn222Thr	ENST00000172853	missense_variant	N/T	aAt/aCt	MODERATE	SNV
NEB	chr2	151727892.0	Missense_Mutation	p.Ile31Met	ENST00000172853	missense_variant	I/M	atT/atG	MODERATE	SNV
NEB	chr2	151692123.0	Missense_Mutation	p.Tyr681Phe	ENST00000172853	missense_variant	Y/F	tAt/tTt	MODERATE	SNV
NEB	chr2	151546442.0	Missense_Mutation	p.Ile5089Thr	ENST00000172853	missense_variant;splice_region_variant	I/T	aTt/aCt	MODERATE	SNV
NEB	chr2	151609981.0	Missense_Mutation	p.Lys3810Arg	ENST00000172853	missense_variant	K/R	aAg/aGg	MODERATE	SNV
NEB	chr2	151610607.0	Missense_Mutation	p.Gly3733Glu	ENST00000172853	missense_variant	G/E	gGa/gAa	MODERATE	SNV
NEB	chr2	151565133.0	Missense_Mutation	p.Thr4427Ser	ENST00000172853	missense_variant	T/S	Aca/Tca	MODERATE	SNV
NEB	chr2	151576239.0	Missense_Mutation	p.Arg3906Gln	ENST00000172853	missense_variant	R/Q	cGg/cAg	MODERATE	SNV
NEB	chr2	151627525.0	Missense_Mutation	p.Asp3138Asn	ENST00000172853	missense_variant;splice_region_variant	D/N	Gat/Aat	MODERATE	SNV
NEB	chr2	151636275.0	Intron		ENST00000172853	intron_variant			MODIFIER	SNV
NEB	chr2	151662282.0	Silent	p.=	ENST00000172853	synonymous_variant	G	ggC/ggA	LOW	SNV
NEB	chr2	151568158.0	Missense_Mutation	p.Trp4218Cys	ENST00000172853	missense_variant	W/C	tgG/tgT	MODERATE	SNV
NEB	chr2	151672387.0	Silent	p.=	ENST00000172853	synonymous_variant	V	gtC/gtA	LOW	SNV
NEB	chr2	151617446.0	Missense_Mutation	p.Asp3457Gly	ENST00000172853	missense_variant	D/G	gAc/gGc	MODERATE	SNV
NEB	chr2	151684830.0	Frame_Shift_Del	p.Pro928LeufsTer29	ENST00000172853	frameshift_variant	P/X	cCt/ct	HIGH	deletion
NEB	chr2	151551792.0	Silent	p.=	ENST00000172853	synonymous_variant	T	acT/acA	LOW	SNV
NEB	chr2	151678047.0	Missense_Mutation	p.Lys1132Asn	ENST00000172853	missense_variant	K/N	aaG/aaT	MODERATE	SNV
NEB	chr2	151498135.0	Intron		ENST00000172853	intron_variant			MODIFIER	SNV
NEB	chr2	151609822.0	Missense_Mutation	p.Asp3863Ala	ENST00000172853	missense_variant	D/A	gAc/gCc	MODERATE	SNV
NEB	chr2	151627676.0	Silent	p.=	ENST00000172853	synonymous_variant	S	agC/agT	LOW	SNV
NEB	chr2	151526948.0	Silent	p.=	ENST00000172853	synonymous_variant	L	ctC/ctT	LOW	SNV
NEB	chr2	151617381.0	Nonsense_Mutation	p.Arg3479Ter	ENST00000172853	stop_gained	R/*	Cga/Tga	HIGH	SNV
NEB	chr2	151633680.0	Intron		ENST00000172853	intron_variant			MODIFIER	SNV
NEB	chr2	151672635.0	Missense_Mutation	p.Gly1345Ser	ENST00000172853	missense_variant	G/S	Ggt/Agt	MODERATE	SNV
NEB	chr2	151671137.0	Silent	p.=	ENST00000172853	synonymous_variant	G	ggC/ggT	LOW	SNV
NEB	chr2	151490400.0	Missense_Mutation	p.Ser6567Arg	ENST00000172853	missense_variant	S/R	agC/agA	MODERATE	SNV
NEB	chr2	151551799.0	Missense_Mutation	p.Ala4927Val	ENST00000172853	missense_variant	A/V	gCt/gTt	MODERATE	SNV
NEB	chr2	151644061.0	Silent	p.=	ENST00000172853	synonymous_variant	D	gaC/gaT	LOW	SNV
NEB	chr2	151672416.0	Missense_Mutation	p.Ala1418Thr	ENST00000172853	missense_variant	A/T	Gcc/Acc	MODERATE	SNV
NEB	chr2	151688376.0	Silent	p.=	ENST00000172853	synonymous_variant	H	caT/caC	LOW	SNV
NEB	chr2	151540785.0	Missense_Mutation	p.Leu5199Pro	ENST00000172853	missense_variant	L/P	cTt/cCt	MODERATE	SNV
NEB	chr2	151553896.0	Missense_Mutation	p.Glu4819Lys	ENST00000172853	missense_variant	E/K	Gaa/Aaa	MODERATE	SNV
NEB	chr2	151625563.0	Missense_Mutation	p.Ala3232Thr	ENST00000172853	missense_variant	A/T	Gca/Aca	MODERATE	SNV
NEB	chr2	151666280.0	Missense_Mutation	p.Tyr1614Cys	ENST00000172853	missense_variant	Y/C	tAc/tGc	MODERATE	SNV
NEB	chr2	151695594.0	Missense_Mutation	p.Ala553Val	ENST00000172853	missense_variant	A/V	gCc/gTc	MODERATE	SNV
NEB	chr2	151533488.0	Intron		ENST00000172853	intron_variant			MODIFIER	SNV
NEB	chr2	151541465.0	Silent	p.=	ENST00000172853	synonymous_variant	G	ggG/ggA	LOW	SNV
NEB	chr2	151560622.0	Silent	p.=	ENST00000172853	synonymous_variant	H	caC/caT	LOW	SNV
NEB	chr2	151650667.0	Silent	p.=	ENST00000172853	synonymous_variant	D	gaC/gaT	LOW	SNV
NEB	chr2	151727833.0	Missense_Mutation	p.Ala51Val	ENST00000172853	missense_variant	A/V	gCt/gTt	MODERATE	SNV
NEB	chr2	151514863.0	Silent	p.=	ENST00000172853	synonymous_variant	T	acG/acA	LOW	SNV
NEB	chr2	151540352.0	Missense_Mutation	p.Ala5261Thr	ENST00000172853	missense_variant	A/T	Gcc/Acc	MODERATE	SNV
NEB	chr2	151633917.0	Intron		ENST00000172853	intron_variant			MODIFIER	SNV
NEB	chr2	151612282.0	Silent	p.=	ENST00000172853	synonymous_variant	R	agG/agA	LOW	SNV
NEB	chr2	151554974.0	Missense_Mutation	p.Pro4761Leu	ENST00000172853	missense_variant	P/L	cCg/cTg	MODERATE	SNV
NEB	chr2	151552671.0	Splice_Site		ENST00000172853	splice_donor_variant			HIGH	SNV
NEB	chr2	151627789.0	Missense_Mutation	p.Gly3050Arg	ENST00000172853	missense_variant	G/R	Gga/Aga	MODERATE	SNV
NEB	chr2	151493376.0	Missense_Mutation	p.Arg6392Cys	ENST00000172853	missense_variant	R/C	Cgc/Tgc	MODERATE	SNV
NEB	chr2	151516497.0	Missense_Mutation	p.Tyr5922His	ENST00000172853	missense_variant	Y/H	Tac/Cac	MODERATE	SNV
NEB	chr2	151490060.0	Missense_Mutation	p.Thr6583Pro	ENST00000172853	missense_variant	T/P	Acc/Ccc	MODERATE	SNV
NEB	chr2	151514353.0	Missense_Mutation	p.Leu5997Ile	ENST00000172853	missense_variant	L/I	Cta/Ata	MODERATE	SNV
NEB	chr2	151526041.0	Missense_Mutation	p.His5659Tyr	ENST00000172853	missense_variant	H/Y	Cac/Tac	MODERATE	SNV
NEB	chr2	151485747.0	3'UTR		ENST00000172853	3_prime_UTR_variant			MODIFIER	insertion
NEB	chr2	151697564.0	Silent	p.=	ENST00000172853	synonymous_variant	L	Ctg/Ttg	LOW	SNV
NEB	chr2	151625537.0	Silent	p.=	ENST00000172853	synonymous_variant	S	agT/agC	LOW	SNV
NEB	chr2	151485650.0	3'UTR		ENST00000172853	3_prime_UTR_variant			MODIFIER	SNV
NEB	chr2	151547694.0	Silent	p.=	ENST00000172853	synonymous_variant	H	caT/caC	LOW	SNV
NEB	chr2	151531040.0	Missense_Mutation	p.Thr5494Ile	ENST00000172853	missense_variant	T/I	aCa/aTa	MODERATE	SNV
NEB	chr2	151579598.0	Intron		ENST00000172853	intron_variant			MODIFIER	SNV
NEB	chr2	151614495.0	Silent	p.=	ENST00000172853	synonymous_variant	H	caT/caC	LOW	SNV
NEB	chr2	151498260.0	Intron		ENST00000172853	intron_variant			MODIFIER	SNV
NEB	chr2	151485923.0	Missense_Mutation	p.Arg6616His	ENST00000172853	missense_variant	R/H	cGt/cAt	MODERATE	SNV
NEB	chr2	151537224.0	Missense_Mutation	p.Glu5338Gln	ENST00000172853	missense_variant	E/Q	Gaa/Caa	MODERATE	SNV
NEB	chr2	151497851.0	Intron		ENST00000172853	intron_variant			MODIFIER	insertion
NEB	chr2	151525981.0	Nonsense_Mutation	p.Glu5679Ter	ENST00000172853	stop_gained	E/*	Gaa/Taa	HIGH	SNV
NEB	chr2	151727828.0	Missense_Mutation	p.Ala53Thr	ENST00000172853	missense_variant	A/T	Gca/Aca	MODERATE	SNV
NEB	chr2	151525986.0	Missense_Mutation	p.Val5677Ala	ENST00000172853	missense_variant	V/A	gTc/gCc	MODERATE	SNV
NEB	chr2	151575776.0	Silent	p.=	ENST00000172853	synonymous_variant	D	gaC/gaT	LOW	SNV
NEB	chr2	151694381.0	Missense_Mutation	p.Ser613Ile	ENST00000172853	missense_variant	S/I	aGc/aTc	MODERATE	SNV
NEB	chr2	151679741.0	Missense_Mutation	p.Ala1079Ser	ENST00000172853	missense_variant	A/S	Gcc/Tcc	MODERATE	SNV
NEB	chr2	151694371.0	Silent	p.=	ENST00000172853	synonymous_variant	D	gaC/gaT	LOW	SNV
NEB	chr2	151551739.0	Missense_Mutation	p.Ser4947Leu	ENST00000172853	missense_variant;splice_region_variant	S/L	tCg/tTg	MODERATE	SNV
NEB	chr2	151526204.0	Missense_Mutation	p.Thr5634Met	ENST00000172853	missense_variant	T/M	aCg/aTg	MODERATE	SNV
NEB	chr2	151492138.0	Missense_Mutation	p.Met6483Ile	ENST00000172853	missense_variant	M/I	atG/atA	MODERATE	SNV
NEB	chr2	151524601.0	Missense_Mutation	p.Asp5729Tyr	ENST00000172853	missense_variant	D/Y	Gat/Tat	MODERATE	SNV
NEB	chr2	151545985.0	Missense_Mutation	p.Tyr5126Cys	ENST00000172853	missense_variant	Y/C	tAc/tGc	MODERATE	SNV
NEB	chr2	151561092.0	Missense_Mutation	p.Asn4672Ser	ENST00000172853	missense_variant	N/S	aAt/aGt	MODERATE	SNV
NEB	chr2	151610576.0	Silent	p.=	ENST00000172853	synonymous_variant	D	gaT/gaC	LOW	SNV
NEB	chr2	151612275.0	Missense_Mutation	p.Arg3663Cys	ENST00000172853	missense_variant	R/C	Cgc/Tgc	MODERATE	SNV
NEB	chr2	151619546.0	Missense_Mutation	p.Asp3350Asn	ENST00000172853	missense_variant	D/N	Gat/Aat	MODERATE	SNV
NEB	chr2	151640450.0	Missense_Mutation	p.Asp2864Asn	ENST00000172853	missense_variant	D/N	Gat/Aat	MODERATE	SNV
NEB	chr2	151640644.0	Missense_Mutation	p.Arg2799His	ENST00000172853	missense_variant	R/H	cGt/cAt	MODERATE	SNV
NEB	chr2	151650265.0	Missense_Mutation	p.Arg2448Cys	ENST00000172853	missense_variant	R/C	Cgt/Tgt	MODERATE	SNV
NEB	chr2	151650748.0	Missense_Mutation	p.Glu2351Asp	ENST00000172853	missense_variant	E/D	gaG/gaT	MODERATE	SNV
NEB	chr2	151656151.0	Splice_Site		ENST00000172853	splice_donor_variant			HIGH	SNV
NEB	chr2	151671042.0	Missense_Mutation	p.Asn1496Ser	ENST00000172853	missense_variant	N/S	aAc/aGc	MODERATE	SNV
NEB	chr2	151531966.0	Intron		ENST00000172853	intron_variant			MODIFIER	SNV
NEB	chr2	151565134.0	Missense_Mutation	p.Glu4426Asp	ENST00000172853	missense_variant	E/D	gaA/gaC	MODERATE	SNV
NEB	chr2	151568616.0	Splice_Site		ENST00000172853	splice_donor_variant			HIGH	SNV
NEB	chr2	151612274.0	Missense_Mutation	p.Arg3663His	ENST00000172853	missense_variant	R/H	cGc/cAc	MODERATE	SNV
NEB	chr2	151662267.0	Missense_Mutation	p.Glu1946Asp	ENST00000172853	missense_variant	E/D	gaG/gaT	MODERATE	SNV
NEB	chr2	151677705.0	Missense_Mutation	p.Asp1212Asn	ENST00000172853	missense_variant	D/N	Gac/Aac	MODERATE	SNV
NEB	chr2	151684812.0	Missense_Mutation	p.Asp934Gly	ENST00000172853	missense_variant	D/G	gAc/gGc	MODERATE	SNV
NEB	chr2	151684965.0	Missense_Mutation	p.Arg883Gln	ENST00000172853	missense_variant	R/Q	cGa/cAa	MODERATE	SNV
NEB	chr2	151691902.0	Missense_Mutation	p.Glu725Lys	ENST00000172853	missense_variant	E/K	Gaa/Aaa	MODERATE	SNV
NEB	chr2	151692356.0	Missense_Mutation	p.Tyr635His	ENST00000172853	missense_variant	Y/H	Tac/Cac	MODERATE	SNV
NEB	chr2	151694408.0	Missense_Mutation	p.Asn604Thr	ENST00000172853	missense_variant	N/T	aAc/aCc	MODERATE	SNV
NEB	chr2	151627121.0	Missense_Mutation	p.Ala3167Ser	ENST00000172853	missense_variant	A/S	Gct/Tct	MODERATE	SNV
NEB	chr2	151679974.0	Missense_Mutation	p.Pro1031Ser	ENST00000172853	missense_variant	P/S	Cca/Tca	MODERATE	SNV
NEB	chr2	151724286.0	Missense_Mutation	p.Val196Ile	ENST00000172853	missense_variant	V/I	Gtt/Att	MODERATE	SNV
NEB	chr2	151724872.0	Silent	p.=	ENST00000172853	synonymous_variant	S	tcG/tcA	LOW	SNV
NEB	chr2	151538228.0	Missense_Mutation	p.Thr5269Lys	ENST00000172853	missense_variant	T/K	aCa/aAa	MODERATE	SNV
NEB	chr2	151553904.0	Missense_Mutation	p.Arg4816His	ENST00000172853	missense_variant	R/H	cGc/cAc	MODERATE	SNV
NEB	chr2	151678027.0	Missense_Mutation	p.Thr1139Met	ENST00000172853	missense_variant	T/M	aCg/aTg	MODERATE	SNV
NEB	chr2	151627616.0	Missense_Mutation	p.Asp3107Glu	ENST00000172853	missense_variant	D/E	gaT/gaG	MODERATE	SNV
NEB	chr2	151650336.0	Missense_Mutation	p.Trp2424Leu	ENST00000172853	missense_variant	W/L	tGg/tTg	MODERATE	SNV
NEB	chr2	151490081.0	Splice_Region		ENST00000172853	splice_region_variant;intron_variant			LOW	deletion
NEB	chr2	151534236.0	Silent	p.=	ENST00000172853	synonymous_variant	T	acC/acT	LOW	SNV
NEB	chr2	151627080.0	Silent	p.=	ENST00000172853	synonymous_variant	P	ccG/ccA	LOW	SNV
NEB	chr2	151687714.0	Missense_Mutation	p.Trp812Leu	ENST00000172853	missense_variant	W/L	tGg/tTg	MODERATE	SNV
NEB	chr2	151694385.0	Missense_Mutation	p.Leu612Phe	ENST00000172853	missense_variant	L/F	Ctc/Ttc	MODERATE	SNV
NEB	chr2	151555035.0	Missense_Mutation	p.Arg4741Trp	ENST00000172853	missense_variant	R/W	Cgg/Tgg	MODERATE	SNV
NEB	chr2	151562609.0	Splice_Site		ENST00000172853	splice_donor_variant			HIGH	SNV
NEB	chr2	151692154.0	Missense_Mutation	p.Asp671Asn	ENST00000172853	missense_variant	D/N	Gac/Aac	MODERATE	SNV
NEB	chr2	151620936.0	Silent	p.=	ENST00000172853	synonymous_variant	R	Cgg/Agg	LOW	SNV
NEB	chr2	151567301.0	Missense_Mutation	p.Ser4307Leu	ENST00000172853	missense_variant	S/L	tCa/tTa	MODERATE	SNV
NEB	chr2	151619714.0	Missense_Mutation	p.Ala3294Pro	ENST00000172853	missense_variant	A/P	Gcc/Ccc	MODERATE	SNV
NEB	chr2	151545957.0	In_Frame_Ins	p.Asp5135_Lys5136insLeuIleAspPhe	ENST00000172853	inframe_insertion	D/DLIDF	gac/gaTTTGATTGACTTc	MODERATE	insertion
NEB	chr2	151666182.0	Missense_Mutation	p.Ala1647Thr	ENST00000172853	missense_variant	A/T	Gcc/Acc	MODERATE	SNV
NEB	chr2	151695630.0	Frame_Shift_Del	p.Pro541LeufsTer16	ENST00000172853	frameshift_variant	P/X	cCt/ct	HIGH	deletion
NEB	chr2	151658048.0	Missense_Mutation	p.Tyr2040His	ENST00000172853	missense_variant	Y/H	Tat/Cat	MODERATE	SNV
NEB	chr2	151576294.0	Missense_Mutation	p.Pro3888Ser	ENST00000172853	missense_variant	P/S	Cct/Tct	MODERATE	SNV
NEB	chr2	151537163.0	Missense_Mutation	p.Leu5358Gln	ENST00000172853	missense_variant	L/Q	cTg/cAg	MODERATE	SNV
NEB	chr2	151691930.0	Frame_Shift_Del	p.Lys715AsnfsTer8	ENST00000172853	frameshift_variant	K/X	aaA/aa	HIGH	deletion
NEB	chr2	151527503.0	Missense_Mutation	p.Lys5572Thr	ENST00000172853	missense_variant	K/T	aAg/aCg	MODERATE	SNV
DNAH5	chr5	13714411.0	Silent	p.=	ENST00000265104	synonymous_variant	P	ccC/ccA	LOW	SNV
DNAH5	chr5	13809188.0	Splice_Site		ENST00000265104	splice_acceptor_variant			HIGH	SNV
DNAH5	chr5	13871736.0	Missense_Mutation	p.Lys1142Asn	ENST00000265104	missense_variant	K/N	aaA/aaT	MODERATE	SNV
DNAH5	chr5	13753370.0	Missense_Mutation	p.Gln3579Lys	ENST00000265104	missense_variant	Q/K	Caa/Aaa	MODERATE	SNV
DNAH5	chr5	13809162.0	Missense_Mutation	p.Arg2545His	ENST00000265104	missense_variant	R/H	cGt/cAt	MODERATE	SNV
DNAH5	chr5	13862706.0	Silent	p.=	ENST00000265104	synonymous_variant	Q	caA/caG	LOW	SNV
DNAH5	chr5	13864514.0	Silent	p.=	ENST00000265104	synonymous_variant	E	gaG/gaA	LOW	SNV
DNAH5	chr5	13867987.0	Silent	p.=	ENST00000265104	synonymous_variant	S	tcT/tcG	LOW	SNV
DNAH5	chr5	13876818.0	Splice_Site		ENST00000265104	splice_acceptor_variant			HIGH	SNV
DNAH5	chr5	13883069.0	Missense_Mutation	p.Lys1003Asn	ENST00000265104	missense_variant	K/N	aaG/aaT	MODERATE	SNV
DNAH5	chr5	13920607.0	Missense_Mutation	p.Arg224Gln	ENST00000265104	missense_variant	R/Q	cGa/cAa	MODERATE	SNV
DNAH5	chr5	13776654.0	Missense_Mutation	p.Ala3053Val	ENST00000265104	missense_variant	A/V	gCa/gTa	MODERATE	SNV
DNAH5	chr5	13901483.0	Silent	p.=	ENST00000265104	synonymous_variant	Y	taT/taC	LOW	SNV
DNAH5	chr5	13830147.0	Missense_Mutation	p.Ser2043Leu	ENST00000265104	missense_variant	S/L	tCg/tTg	MODERATE	SNV
DNAH5	chr5	13882808.0	Missense_Mutation	p.Ile1061Thr	ENST00000265104	missense_variant	I/T	aTa/aCa	MODERATE	SNV
DNAH5	chr5	13692085.0	Nonsense_Mutation	p.Arg4592Ter	ENST00000265104	stop_gained	R/*	Cga/Tga	HIGH	SNV
DNAH5	chr5	13691971.0	Missense_Mutation		ENST00000265104	coding_sequence_variant;3_prime_UTR_variant			MODIFIER	deletion
DNAH5	chr5	13735317.0	Missense_Mutation	p.Val3859Phe	ENST00000265104	missense_variant	V/F	Gtc/Ttc	MODERATE	SNV
DNAH5	chr5	13766163.0	Missense_Mutation	p.Asp3305Gly	ENST00000265104	missense_variant	D/G	gAc/gGc	MODERATE	SNV
DNAH5	chr5	13708309.0	Silent	p.=	ENST00000265104	synonymous_variant	G	ggG/ggA	LOW	SNV
DNAH5	chr5	13735290.0	Missense_Mutation	p.Ile3868Val	ENST00000265104	missense_variant	I/V	Att/Gtt	MODERATE	SNV
DNAH5	chr5	13754211.0	Missense_Mutation	p.Arg3516Ile	ENST00000265104	missense_variant	R/I	aGa/aTa	MODERATE	SNV
DNAH5	chr5	13769546.0	Missense_Mutation	p.Glu3225Asp	ENST00000265104	missense_variant	E/D	gaA/gaC	MODERATE	SNV
DNAH5	chr5	13793943.0	Missense_Mutation	p.Gly2668Glu	ENST00000265104	missense_variant	G/E	gGa/gAa	MODERATE	SNV
DNAH5	chr5	13867947.0	Missense_Mutation	p.Glu1294Lys	ENST00000265104	missense_variant	E/K	Gaa/Aaa	MODERATE	SNV
DNAH5	chr5	13920485.0	Missense_Mutation	p.Glu265Lys	ENST00000265104	missense_variant	E/K	Gaa/Aaa	MODERATE	SNV
DNAH5	chr5	13928138.0	Missense_Mutation	p.Arg78Gln	ENST00000265104	missense_variant	R/Q	cGa/cAa	MODERATE	SNV
DNAH5	chr5	13811768.0	Missense_Mutation	p.Thr2429Ile	ENST00000265104	missense_variant	T/I	aCc/aTc	MODERATE	SNV
DNAH5	chr5	13865850.0	Silent	p.=	ENST00000265104	synonymous_variant	L	ctT/ctC	LOW	SNV
DNAH5	chr5	13839462.0	Nonsense_Mutation	p.Glu1926Ter	ENST00000265104	stop_gained	E/*	Gaa/Taa	HIGH	SNV
DNAH5	chr5	13692129.0	Missense_Mutation	p.Arg4577Gln	ENST00000265104	missense_variant	R/Q	cGa/cAa	MODERATE	SNV
DNAH5	chr5	13752231.0	Missense_Mutation	p.Gly3644Glu	ENST00000265104	missense_variant	G/E	gGa/gAa	MODERATE	SNV
DNAH5	chr5	13823331.0	Missense_Mutation	p.Asp2207Tyr	ENST00000265104	missense_variant	D/Y	Gat/Tat	MODERATE	SNV
DNAH5	chr5	13844992.0	Missense_Mutation	p.Tyr1706His	ENST00000265104	missense_variant;splice_region_variant	Y/H	Tac/Cac	MODERATE	SNV
DNAH5	chr5	13919188.0	Silent	p.=	ENST00000265104	synonymous_variant	S	tcG/tcA	LOW	SNV
DNAH5	chr5	13931142.0	Missense_Mutation	p.Glu54Lys	ENST00000265104	missense_variant	E/K	Gaa/Aaa	MODERATE	SNV
DNAH5	chr5	13753448.0	Missense_Mutation	p.Arg3553Trp	ENST00000265104	missense_variant	R/W	Cgg/Tgg	MODERATE	SNV
DNAH5	chr5	13862658.0	Silent	p.=	ENST00000265104	synonymous_variant	F	ttC/ttT	LOW	SNV
DNAH5	chr5	13708308.0	Missense_Mutation	p.Pro4385Ser	ENST00000265104	missense_variant	P/S	Cca/Tca	MODERATE	SNV
DNAH5	chr5	13737479.0	Missense_Mutation	p.Arg3743Ile	ENST00000265104	missense_variant	R/I	aGa/aTa	MODERATE	SNV
DNAH5	chr5	13867839.0	Missense_Mutation	p.Glu1330Lys	ENST00000265104	missense_variant	E/K	Gag/Aag	MODERATE	SNV
DNAH5	chr5	13885222.0	Missense_Mutation	p.Arg917Ile	ENST00000265104	missense_variant	R/I	aGa/aTa	MODERATE	SNV
DNAH5	chr5	13714441.0	Missense_Mutation	p.Met4363Ile	ENST00000265104	missense_variant	M/I	atG/atT	MODERATE	SNV
DNAH5	chr5	13810163.0	Missense_Mutation	p.Arg2502His	ENST00000265104	missense_variant	R/H	cGc/cAc	MODERATE	SNV
DNAH5	chr5	13883022.0	Missense_Mutation	p.Pro1019His	ENST00000265104	missense_variant	P/H	cCc/cAc	MODERATE	SNV
DNAH5	chr5	13862731.0	Missense_Mutation	p.Ala1538Val	ENST00000265104	missense_variant	A/V	gCg/gTg	MODERATE	SNV
DNAH5	chr5	13700753.0	Missense_Mutation	p.Gly4537Asp	ENST00000265104	missense_variant	G/D	gGc/gAc	MODERATE	SNV
DNAH5	chr5	13841735.0	Missense_Mutation	p.Thr1814Ile	ENST00000265104	missense_variant	T/I	aCa/aTa	MODERATE	SNV
DNAH5	chr5	13786273.0	Missense_Mutation	p.Arg2909His	ENST00000265104	missense_variant	R/H	cGt/cAt	MODERATE	SNV
DNAH5	chr5	13917170.0	Missense_Mutation	p.Cys354Trp	ENST00000265104	missense_variant	C/W	tgT/tgG	MODERATE	SNV
DNAH5	chr5	13716567.0	Missense_Mutation	p.Phe4277Leu	ENST00000265104	missense_variant	F/L	Ttt/Ctt	MODERATE	SNV
DNAH5	chr5	13810184.0	Missense_Mutation	p.Ala2495Val	ENST00000265104	missense_variant	A/V	gCg/gTg	MODERATE	SNV
DNAH5	chr5	13766130.0	Frame_Shift_Del	p.Pro3316LeufsTer22	ENST00000265104	frameshift_variant	P/X	cCt/ct	HIGH	deletion
DNAH5	chr5	13830731.0	Frame_Shift_Del	p.Gly1976GlufsTer78	ENST00000265104	frameshift_variant	G/X	gGa/ga	HIGH	deletion
DNAH5	chr5	13776577.0	Nonsense_Mutation	p.Arg3079Ter	ENST00000265104	stop_gained	R/*	Cga/Tga	HIGH	SNV
DNAH5	chr5	13916384.0	Silent	p.=	ENST00000265104	synonymous_variant	Y	taT/taC	LOW	SNV
DNAH5	chr5	13841066.0	Missense_Mutation	p.Lys1850Thr	ENST00000265104	missense_variant	K/T	aAg/aCg	MODERATE	SNV
DNAH5	chr5	13692016.0	Missense_Mutation	p.Arg4615Cys	ENST00000265104	missense_variant	R/C	Cgt/Tgt	MODERATE	SNV
DNAH5	chr5	13823310.0	Missense_Mutation	p.Leu2214Met	ENST00000265104	missense_variant	L/M	Ctg/Atg	MODERATE	SNV
DNAH5	chr5	13885022.0	Missense_Mutation	p.Arg984Cys	ENST00000265104	missense_variant	R/C	Cgt/Tgt	MODERATE	SNV
DNAH5	chr5	13717456.0	Silent	p.=	ENST00000265104	synonymous_variant	V	gtG/gtC	LOW	SNV
DNAH5	chr5	13721150.0	Silent	p.=	ENST00000265104	synonymous_variant	T	acG/acA	LOW	SNV
DNAH5	chr5	13870945.0	Missense_Mutation	p.Arg1219His	ENST00000265104	missense_variant	R/H	cGc/cAc	MODERATE	SNV
DNAH5	chr5	13864633.0	Nonsense_Mutation	p.Arg1454Ter	ENST00000265104	stop_gained	R/*	Cga/Tga	HIGH	SNV
DNAH5	chr5	13735860.0	Missense_Mutation	p.Ser3843Leu	ENST00000265104	missense_variant	S/L	tCg/tTg	MODERATE	SNV
DNAH5	chr5	13776525.0	Missense_Mutation	p.Arg3096Gln	ENST00000265104	missense_variant	R/Q	cGa/cAa	MODERATE	SNV
DNAH5	chr5	13919274.0	Frame_Shift_Del	p.Arg293AspfsTer12	ENST00000265104	frameshift_variant	R/X	Aga/ga	HIGH	deletion
DNAH5	chr5	13721067.0	Missense_Mutation	p.Arg4071His	ENST00000265104	missense_variant	R/H	cGt/cAt	MODERATE	SNV
DNAH5	chr5	13770766.0	Silent	p.=	ENST00000265104	synonymous_variant	V	gtG/gtA	LOW	SNV
DNAH5	chr5	13867920.0	Missense_Mutation	p.His1303Tyr	ENST00000265104	missense_variant	H/Y	Cac/Tac	MODERATE	SNV
DNAH5	chr5	13944475.0	5'UTR		ENST00000265104	5_prime_UTR_variant			MODIFIER	SNV
DNAH5	chr5	13817652.0	Missense_Mutation	p.Ala2295Val	ENST00000265104	missense_variant	A/V	gCg/gTg	MODERATE	SNV
DNAH5	chr5	13839489.0	Missense_Mutation	p.Leu1917Val	ENST00000265104	missense_variant	L/V	Ctg/Gtg	MODERATE	SNV
DNAH5	chr5	13708185.0	Missense_Mutation	p.Glu4426Lys	ENST00000265104	missense_variant	E/K	Gaa/Aaa	MODERATE	SNV
DNAH5	chr5	13753447.0	Missense_Mutation	p.Arg3553Gln	ENST00000265104	missense_variant	R/Q	cGg/cAg	MODERATE	SNV
DNAH5	chr5	13721077.0	Frame_Shift_Del	p.Ile4068Ter	ENST00000265104	frameshift_variant	I/X	Ata/ta	HIGH	deletion
DNAH5	chr5	13776517.0	Frame_Shift_Del	p.Arg3098SerfsTer14	ENST00000265104	frameshift_variant	RA/SX	agAGct/agct	HIGH	deletion
DNAH5	chr5	13839376.0	Silent	p.=	ENST00000265104	synonymous_variant	V	gtA/gtG	LOW	SNV
DNAH5	chr5	13793622.0	Missense_Mutation	p.Met2706Thr	ENST00000265104	missense_variant	M/T	aTg/aCg	MODERATE	SNV
DNAH5	chr5	13911385.0	Splice_Site		ENST00000265104	splice_donor_variant			HIGH	SNV
DNAH5	chr5	13911487.0	Missense_Mutation	p.Val515Leu	ENST00000265104	missense_variant	V/L	Gtg/Ttg	MODERATE	SNV
DNAH5	chr5	13885156.0	Missense_Mutation	p.Thr939Met	ENST00000265104	missense_variant	T/M	aCg/aTg	MODERATE	SNV
DNAH5	chr5	13824222.0	Missense_Mutation	p.Arg2186Trp	ENST00000265104	missense_variant	R/W	Cgg/Tgg	MODERATE	SNV
DNAH5	chr5	13692102.0	Missense_Mutation	p.Ile4586Thr	ENST00000265104	missense_variant	I/T	aTc/aCc	MODERATE	SNV
DNAH5	chr5	13701317.0	Frame_Shift_Del	p.Phe4486LeufsTer7	ENST00000265104	frameshift_variant	F/X	ttT/tt	HIGH	deletion
DNAH5	chr5	13865841.0	Silent	p.=	ENST00000265104	synonymous_variant	L	ctG/ctA	LOW	SNV
DNAH5	chr5	13850761.0	Missense_Mutation	p.Ala1669Thr	ENST00000265104	missense_variant	A/T	Gca/Aca	MODERATE	SNV
DNAH5	chr5	13883046.0	Missense_Mutation	p.Arg1011Gln	ENST00000265104	missense_variant	R/Q	cGg/cAg	MODERATE	SNV
DNAH5	chr5	13864574.0	Silent	p.=	ENST00000265104	synonymous_variant	I	atT/atC	LOW	SNV
DNAH5	chr5	13692120.0	Missense_Mutation	p.Arg4580Gln	ENST00000265104	missense_variant	R/Q	cGg/cAg	MODERATE	SNV
DNAH5	chr5	13864593.0	Frame_Shift_Del	p.Leu1467TrpfsTer3	ENST00000265104	frameshift_variant	L/X	tTg/tg	HIGH	deletion
DNAH5	chr5	13841052.0	Frame_Shift_Del	p.Ile1855SerfsTer16	ENST00000265104	frameshift_variant	I/X	Atc/tc	HIGH	deletion
DNAH5	chr5	13735924.0	Missense_Mutation	p.Arg3822Trp	ENST00000265104	missense_variant	R/W	Cgg/Tgg	MODERATE	SNV
DNAH5	chr5	13920537.0	Silent	p.=	ENST00000265104	synonymous_variant	P	ccT/ccC	LOW	SNV
DNAH5	chr5	13870825.0	Missense_Mutation	p.Ala1259Val	ENST00000265104	missense_variant	A/V	gCg/gTg	MODERATE	SNV
DNAH5	chr5	13928154.0	Frame_Shift_Ins	p.Ala73CysfsTer37	ENST00000265104	frameshift_variant	-/X	-/T	HIGH	insertion
DNAH5	chr5	13758956.0	Missense_Mutation	p.His3437Asn	ENST00000265104	missense_variant	H/N	Cat/Aat	MODERATE	SNV
DNAH5	chr5	13708239.0	Missense_Mutation	p.Arg4408Cys	ENST00000265104	missense_variant	R/C	Cgc/Tgc	MODERATE	SNV
DNAH5	chr5	13770833.0	Missense_Mutation	p.Thr3174Met	ENST00000265104	missense_variant	T/M	aCg/aTg	MODERATE	SNV
DNAH5	chr5	13718893.0	Missense_Mutation	p.Arg4163Ile	ENST00000265104	missense_variant	R/I	aGa/aTa	MODERATE	SNV
DNAH5	chr5	13737427.0	Silent	p.=	ENST00000265104	synonymous_variant	L	ctA/ctC	LOW	SNV
DNAH5	chr5	13770799.0	Silent	p.=	ENST00000265104	synonymous_variant	Y	taT/taC	LOW	SNV
DNAH5	chr5	13865680.0	Missense_Mutation	p.Glu1448Ala	ENST00000265104	missense_variant	E/A	gAa/gCa	MODERATE	SNV
DNAH5	chr5	13876757.0	Missense_Mutation	p.Lys1108Thr	ENST00000265104	missense_variant	K/T	aAg/aCg	MODERATE	SNV
DNAH5	chr5	13882814.0	Missense_Mutation	p.Lys1059Arg	ENST00000265104	missense_variant;splice_region_variant	K/R	aAa/aGa	MODERATE	SNV
DNAH5	chr5	13911397.0	Missense_Mutation	p.Asn545His	ENST00000265104	missense_variant	N/H	Aat/Cat	MODERATE	SNV
DNAH5	chr5	13922180.0	Missense_Mutation	p.Arg196His	ENST00000265104	missense_variant	R/H	cGc/cAc	MODERATE	SNV
DNAH5	chr5	13885151.0	Missense_Mutation	p.Val941Phe	ENST00000265104	missense_variant	V/F	Gtc/Ttc	MODERATE	SNV
DNAH5	chr5	13786274.0	Missense_Mutation	p.Arg2909Cys	ENST00000265104	missense_variant	R/C	Cgt/Tgt	MODERATE	SNV
DNAH5	chr5	13719007.0	Missense_Mutation	p.Ala4125Val	ENST00000265104	missense_variant	A/V	gCg/gTg	MODERATE	SNV
DNAH5	chr5	13721203.0	Missense_Mutation	p.Glu4026Lys	ENST00000265104	missense_variant	E/K	Gaa/Aaa	MODERATE	SNV
DNAH5	chr5	13830704.0	Missense_Mutation	p.Gly1985Asp	ENST00000265104	missense_variant	G/D	gGc/gAc	MODERATE	SNV
DNAH5	chr5	13766114.0	Silent	p.=	ENST00000265104	synonymous_variant	R	cgG/cgT	LOW	SNV
DNAH5	chr5	13841064.0	Missense_Mutation	p.Phe1851Leu	ENST00000265104	missense_variant	F/L	Ttt/Ctt	MODERATE	SNV
DNAH5	chr5	13718981.0	Missense_Mutation	p.Ala4134Ser	ENST00000265104	missense_variant	A/S	Gct/Tct	MODERATE	SNV
DNAH5	chr5	13766136.0	Missense_Mutation	p.Arg3314Pro	ENST00000265104	missense_variant	R/P	cGc/cCc	MODERATE	SNV
DNAH5	chr5	13919298.0	Missense_Mutation	p.Ala285Thr	ENST00000265104	missense_variant	A/T	Gcg/Acg	MODERATE	SNV
DNAH5	chr5	13701327.0	Missense_Mutation	p.Thr4483Met	ENST00000265104	missense_variant	T/M	aCg/aTg	MODERATE	SNV
DNAH5	chr5	13770880.0	Missense_Mutation	p.Glu3158Asp	ENST00000265104	missense_variant	E/D	gaG/gaT	MODERATE	SNV
DNAH5	chr5	13807700.0	Missense_Mutation	p.Gly2593Glu	ENST00000265104	missense_variant	G/E	gGa/gAa	MODERATE	SNV
DNAH5	chr5	13876768.0	Missense_Mutation	p.Lys1104Asn	ENST00000265104	missense_variant	K/N	aaG/aaT	MODERATE	SNV
DNAH5	chr5	13900258.0	Missense_Mutation	p.Thr736Asn	ENST00000265104	missense_variant	T/N	aCt/aAt	MODERATE	SNV
DNAH5	chr5	13769516.0	Silent	p.=	ENST00000265104	synonymous_variant	N	aaC/aaT	LOW	SNV
DNAH5	chr5	13776531.0	Missense_Mutation	p.Lys3094Thr	ENST00000265104	missense_variant	K/T	aAa/aCa	MODERATE	SNV
DNAH5	chr5	13876751.0	Missense_Mutation	p.Val1110Ala	ENST00000265104	missense_variant	V/A	gTt/gCt	MODERATE	SNV
DNAH5	chr5	13810194.0	Missense_Mutation	p.Ala2492Thr	ENST00000265104	missense_variant	A/T	Gcg/Acg	MODERATE	SNV
DNAH5	chr5	13780948.0	Frame_Shift_Ins	p.Ile2945ArgfsTer76	ENST00000265104	frameshift_variant	V/VREMX	gtc/gtAAGAGAAATGc	HIGH	insertion
DNAH5	chr5	13700758.0	Silent	p.=	ENST00000265104	synonymous_variant	V	gtC/gtT	LOW	SNV
DNAH5	chr5	13753246.0	Missense_Mutation	p.Arg3620Gln	ENST00000265104	missense_variant	R/Q	cGa/cAa	MODERATE	SNV
DNAH5	chr5	13776465.0	Missense_Mutation	p.Arg3116Gln	ENST00000265104	missense_variant	R/Q	cGa/cAa	MODERATE	SNV
DNAH5	chr5	13776466.0	Nonsense_Mutation	p.Arg3116Ter	ENST00000265104	stop_gained	R/*	Cga/Tga	HIGH	SNV
DNAH5	chr5	13830169.0	Missense_Mutation	p.Arg2036Cys	ENST00000265104	missense_variant	R/C	Cgt/Tgt	MODERATE	SNV
DNAH5	chr5	13717461.0	Missense_Mutation	p.Ala4187Thr	ENST00000265104	missense_variant	A/T	Gca/Aca	MODERATE	SNV
DNAH5	chr5	13735306.0	Silent	p.=	ENST00000265104	synonymous_variant	P	ccG/ccA	LOW	SNV
DNAH2	chr17	7743025.0	Missense_Mutation	p.Arg596Gln	ENST00000389173	missense_variant	R/Q	cGa/cAa	MODERATE	SNV
DNAH2	chr17	7786135.0	Silent	p.=	ENST00000389173	synonymous_variant	T	acC/acT	LOW	SNV
DNAH2	chr17	7792736.0	Missense_Mutation	p.Gln2409Lys	ENST00000389173	missense_variant	Q/K	Cag/Aag	MODERATE	SNV
DNAH2	chr17	7764132.0	Silent	p.=	ENST00000389173	synonymous_variant	P	ccG/ccA	LOW	SNV
DNAH2	chr17	7778358.0	Silent	p.=	ENST00000389173	synonymous_variant	T	acC/acT	LOW	SNV
DNAH2	chr17	7796583.0	Silent	p.=	ENST00000389173	synonymous_variant	T	acC/acT	LOW	SNV
DNAH2	chr17	7819050.0	Missense_Mutation	p.Asp3601Gly	ENST00000389173	missense_variant	D/G	gAc/gGc	MODERATE	SNV
DNAH2	chr17	7831422.0	Missense_Mutation	p.Lys4164Asn	ENST00000389173	missense_variant	K/N	aaG/aaT	MODERATE	SNV
DNAH2	chr17	7768008.0	Missense_Mutation	p.Thr1262Ala	ENST00000389173	missense_variant	T/A	Acc/Gcc	MODERATE	SNV
DNAH2	chr17	7765417.0	Silent	p.=	ENST00000389173	synonymous_variant	N	aaC/aaT	LOW	SNV
DNAH2	chr17	7792763.0	Missense_Mutation	p.Val2418Met	ENST00000389173	missense_variant	V/M	Gtg/Atg	MODERATE	SNV
DNAH2	chr17	7832920.0	Frame_Shift_Del	p.Lys4326ArgfsTer84	ENST00000389173	frameshift_variant	P/X	Ccc/cc	HIGH	deletion
DNAH2	chr17	7775289.0	Missense_Mutation	p.Asp1590Asn	ENST00000389173	missense_variant	D/N	Gac/Aac	MODERATE	SNV
DNAH2	chr17	7760846.0	Missense_Mutation	p.Glu964Asp	ENST00000389173	missense_variant	E/D	gaG/gaT	MODERATE	SNV
DNAH2	chr17	7819224.0	Missense_Mutation	p.Ala3611Thr	ENST00000389173	missense_variant	A/T	Gcc/Acc	MODERATE	SNV
DNAH2	chr17	7765517.0	Missense_Mutation	p.Asp1155Tyr	ENST00000389173	missense_variant	D/Y	Gac/Tac	MODERATE	SNV
DNAH2	chr17	7774855.0	Missense_Mutation	p.Arg1533His	ENST00000389173	missense_variant	R/H	cGc/cAc	MODERATE	SNV
DNAH2	chr17	7786151.0	Nonsense_Mutation	p.Arg2053Ter	ENST00000389173	stop_gained	R/*	Cga/Tga	HIGH	SNV
DNAH2	chr17	7737173.0	Missense_Mutation	p.Pro362His	ENST00000389173	missense_variant	P/H	cCt/cAt	MODERATE	SNV
DNAH2	chr17	7818091.0	Missense_Mutation	p.Arg3461Gln	ENST00000389173	missense_variant	R/Q	cGa/cAa	MODERATE	SNV
DNAH2	chr17	7797413.0	Missense_Mutation	p.Arg2655Trp	ENST00000389173	missense_variant	R/W	Cgg/Tgg	MODERATE	SNV
DNAH2	chr17	7832892.0	Silent	p.=	ENST00000389173	synonymous_variant	S	tcC/tcT	LOW	SNV
DNAH2	chr17	7830416.0	Frame_Shift_Del	p.Leu3992ThrfsTer2	ENST00000389173	frameshift_variant	SV/SX	tcTGtg/tctg	HIGH	deletion
DNAH2	chr17	7739757.0	Missense_Mutation	p.Ala399Thr	ENST00000389173	missense_variant	A/T	Gcc/Acc	MODERATE	SNV
DNAH2	chr17	7830441.0	Missense_Mutation	p.Leu3999Met	ENST00000389173	missense_variant	L/M	Ctg/Atg	MODERATE	SNV
DNAH2	chr17	7727256.0	Frame_Shift_Del	p.Phe122LeufsTer3	ENST00000389173	frameshift_variant	C/X	tgT/tg	HIGH	deletion
DNAH2	chr17	7737193.0	Missense_Mutation	p.Arg369Cys	ENST00000389173	missense_variant	R/C	Cgc/Tgc	MODERATE	SNV
DNAH2	chr17	7832867.0	Missense_Mutation	p.Ser4306Asn	ENST00000389173	missense_variant	S/N	aGc/aAc	MODERATE	SNV
DNAH2	chr17	7792048.0	Silent	p.=	ENST00000389173	synonymous_variant	I	atC/atT	LOW	SNV
DNAH2	chr17	7786259.0	Missense_Mutation	p.Gly2089Ser	ENST00000389173	missense_variant	G/S	Ggc/Agc	MODERATE	SNV
DNAH2	chr17	7777496.0	Missense_Mutation	p.Lys1703Asn	ENST00000389173	missense_variant	K/N	aaG/aaT	MODERATE	SNV
DNAH2	chr17	7817324.0	Missense_Mutation	p.Asp3310Gly	ENST00000389173	missense_variant	D/G	gAc/gGc	MODERATE	SNV
DNAH2	chr17	7737238.0	Missense_Mutation	p.Leu384Val	ENST00000389173	missense_variant	L/V	Ctg/Gtg	MODERATE	SNV
DNAH2	chr17	7817999.0	Silent	p.=	ENST00000389173	synonymous_variant	H	caC/caT	LOW	SNV
DNAH2	chr17	7832639.0	Frame_Shift_Del	p.Gln4263SerfsTer13	ENST00000389173	frameshift_variant	Q/X	Cag/ag	HIGH	deletion
DNAH2	chr17	7792688.0	Missense_Mutation	p.Val2393Ile	ENST00000389173	missense_variant	V/I	Gtc/Atc	MODERATE	SNV
DNAH2	chr17	7786938.0	Missense_Mutation	p.Val2170Met	ENST00000389173	missense_variant	V/M	Gtg/Atg	MODERATE	SNV
DNAH2	chr17	7733201.0	Missense_Mutation	p.Leu172Phe	ENST00000389173	missense_variant	L/F	Ctt/Ttt	MODERATE	SNV
DNAH2	chr17	7743073.0	Missense_Mutation	p.Arg612Gln	ENST00000389173	missense_variant	R/Q	cGg/cAg	MODERATE	SNV
DNAH2	chr17	7792278.0	Frame_Shift_Del	p.Ile2363TyrfsTer40	ENST00000389173	frameshift_variant	D/X	gaC/ga	HIGH	deletion
DNAH2	chr17	7734253.0	Silent	p.=	ENST00000389173	synonymous_variant	E	gaG/gaA	LOW	SNV
DNAH2	chr17	7766446.0	Nonsense_Mutation	p.Gln1214Ter	ENST00000389173	stop_gained	Q/*	Cag/Tag	HIGH	SNV
DNAH2	chr17	7817665.0	Silent	p.=	ENST00000389173	synonymous_variant	D	gaC/gaT	LOW	SNV
DNAH2	chr17	7758626.0	Missense_Mutation	p.Thr728Met	ENST00000389173	missense_variant	T/M	aCg/aTg	MODERATE	SNV
DNAH2	chr17	7833119.0	Missense_Mutation	p.Arg4343Trp	ENST00000389173	missense_variant	R/W	Cgg/Tgg	MODERATE	SNV
DNAH2	chr17	7804302.0	Missense_Mutation	p.Leu3007Val	ENST00000389173	missense_variant	L/V	Ctg/Gtg	MODERATE	SNV
DNAH2	chr17	7754930.0	Intron		ENST00000389173	intron_variant			MODIFIER	SNV
DNAH2	chr17	7759462.0	Missense_Mutation	p.Arg830His	ENST00000389173	missense_variant	R/H	cGc/cAc	MODERATE	SNV
DNAH2	chr17	7817666.0	Missense_Mutation	p.Ala3376Thr	ENST00000389173	missense_variant	A/T	Gcc/Acc	MODERATE	SNV
DNAH2	chr17	7780751.0	Missense_Mutation	p.Arg1991His	ENST00000389173	missense_variant	R/H	cGc/cAc	MODERATE	SNV
DNAH2	chr17	7757133.0	Silent	p.=	ENST00000389173	synonymous_variant	R	cgG/cgA	LOW	SNV
DNAH2	chr17	7831156.0	Missense_Mutation	p.Leu4101Val	ENST00000389173	missense_variant	L/V	Tta/Gta	MODERATE	SNV
DNAH2	chr17	7765555.0	Silent	p.=	ENST00000389173	synonymous_variant	F	ttC/ttT	LOW	SNV
DNAH2	chr17	7776816.0	Missense_Mutation	p.Asp1662Gly	ENST00000389173	missense_variant	D/G	gAt/gGt	MODERATE	SNV
DNAH2	chr17	7833186.0	Missense_Mutation	p.Phe4365Ser	ENST00000389173	missense_variant	F/S	tTc/tCc	MODERATE	SNV
DNAH2	chr17	7786290.0	Missense_Mutation	p.Ala2099Val	ENST00000389173	missense_variant	A/V	gCc/gTc	MODERATE	SNV
DNAH2	chr17	7766378.0	Missense_Mutation	p.Ala1191Gly	ENST00000389173	missense_variant	A/G	gCc/gGc	MODERATE	SNV
DNAH2	chr17	7764012.0	Missense_Mutation	p.Leu1054Met	ENST00000389173	missense_variant	L/M	Ctg/Atg	MODERATE	SNV
DNAH2	chr17	7779282.0	Missense_Mutation	p.Asn1861Asp	ENST00000389173	missense_variant	N/D	Aac/Gac	MODERATE	SNV
DNAH2	chr17	7743279.0	Intron		ENST00000389173	intron_variant			MODIFIER	deletion
DNAH2	chr17	7831508.0	Missense_Mutation	p.Ile4193Ser	ENST00000389173	missense_variant	I/S	aTc/aGc	MODERATE	SNV
DNAH2	chr17	7831683.0	Missense_Mutation	p.Lys4212Gln	ENST00000389173	missense_variant	K/Q	Aaa/Caa	MODERATE	SNV
DNAH2	chr17	7740928.0	Missense_Mutation	p.Ala542Val	ENST00000389173	missense_variant	A/V	gCc/gTc	MODERATE	SNV
DNAH2	chr17	7758518.0	Missense_Mutation	p.Asp692Gly	ENST00000389173	missense_variant	D/G	gAt/gGt	MODERATE	SNV
DNAH2	chr17	7777533.0	Nonsense_Mutation	p.Glu1716Ter	ENST00000389173	stop_gained	E/*	Gaa/Taa	HIGH	SNV
DNAH2	chr17	7786148.0	Missense_Mutation	p.Ile2052Val	ENST00000389173	missense_variant	I/V	Att/Gtt	MODERATE	SNV
DNAH2	chr17	7797238.0	Silent	p.=	ENST00000389173	synonymous_variant	R	cgG/cgT	LOW	SNV
DNAH2	chr17	7831311.0	Missense_Mutation	p.Glu4152Asp	ENST00000389173	missense_variant	E/D	gaG/gaT	MODERATE	SNV
DNAH2	chr17	7796584.0	Missense_Mutation	p.Val2599Met	ENST00000389173	missense_variant	V/M	Gtg/Atg	MODERATE	SNV
DNAH2	chr17	7719762.0	Nonsense_Mutation	p.Arg10Ter	ENST00000389173	stop_gained	R/*	Cga/Tga	HIGH	SNV
DNAH2	chr17	7767916.0	Missense_Mutation	p.Gln1231Arg	ENST00000389173	missense_variant	Q/R	cAg/cGg	MODERATE	SNV
DNAH2	chr17	7779407.0	Missense_Mutation	p.Phe1902Leu	ENST00000389173	missense_variant	F/L	ttC/ttA	MODERATE	SNV
DNAH2	chr17	7798157.0	Missense_Mutation	p.Ile2744Thr	ENST00000389173	missense_variant;splice_region_variant	I/T	aTc/aCc	MODERATE	SNV
DNAH2	chr17	7737168.0	Silent	p.=	ENST00000389173	synonymous_variant	K	aaG/aaA	LOW	SNV
DNAH2	chr17	7801606.0	Missense_Mutation	p.Val2910Leu	ENST00000389173	missense_variant	V/L	Gtg/Ctg	MODERATE	SNV
DNAH2	chr17	7760752.0	Missense_Mutation	p.Asp933Gly	ENST00000389173	missense_variant	D/G	gAc/gGc	MODERATE	SNV
DNAH2	chr17	7764226.0	Missense_Mutation	p.Glu1097Lys	ENST00000389173	missense_variant	E/K	Gag/Aag	MODERATE	SNV
DNAH2	chr17	7765483.0	Missense_Mutation	p.Glu1143Asp	ENST00000389173	missense_variant	E/D	gaG/gaT	MODERATE	SNV
DNAH2	chr17	7737164.0	Missense_Mutation	p.Ser359Asn	ENST00000389173	missense_variant	S/N	aGc/aAc	MODERATE	SNV
DNAH2	chr17	7780245.0	Silent	p.=	ENST00000389173	synonymous_variant	A	gcA/gcG	LOW	SNV
DNAH2	chr17	7734270.0	Missense_Mutation	p.Lys239Thr	ENST00000389173	missense_variant	K/T	aAa/aCa	MODERATE	SNV
DNAH2	chr17	7774839.0	Nonsense_Mutation	p.Arg1528Ter	ENST00000389173	stop_gained	R/*	Cga/Tga	HIGH	SNV
DNAH2	chr17	7777601.0	Missense_Mutation	p.Asp1738Glu	ENST00000389173	missense_variant	D/E	gaC/gaA	MODERATE	SNV
DNAH2	chr17	7779346.0	Missense_Mutation	p.Gly1882Asp	ENST00000389173	missense_variant	G/D	gGc/gAc	MODERATE	SNV
DNAH2	chr17	7819309.0	Missense_Mutation	p.Ile3639Thr	ENST00000389173	missense_variant	I/T	aTc/aCc	MODERATE	SNV
DNAH2	chr17	7833462.0	Missense_Mutation	p.Arg4405Trp	ENST00000389173	missense_variant	R/W	Cgg/Tgg	MODERATE	SNV
DNAH2	chr17	7786343.0	Splice_Site		ENST00000389173	splice_donor_variant			HIGH	SNV
DNAH2	chr17	7797263.0	Splice_Site		ENST00000389173	splice_donor_variant			HIGH	SNV
DNAH2	chr17	7739921.0	Nonsense_Mutation	p.Trp453Ter	ENST00000389173	stop_gained	W/*	tgG/tgA	HIGH	SNV
DNAH2	chr17	7740503.0	Missense_Mutation	p.His487Arg	ENST00000389173	missense_variant	H/R	cAc/cGc	MODERATE	SNV
DNAH2	chr17	7734574.0	Missense_Mutation	p.Arg282Cys	ENST00000389173	missense_variant	R/C	Cgc/Tgc	MODERATE	SNV
DNAH2	chr17	7760842.0	Missense_Mutation	p.Arg963Gln	ENST00000389173	missense_variant	R/Q	cGg/cAg	MODERATE	SNV
COL12A1	chr6	75130941.0	Missense_Mutation	p.Arg1993Gln	ENST00000322507	missense_variant	R/Q	cGg/cAg	MODERATE	SNV
COL12A1	chr6	75142089.0	Missense_Mutation	p.Val1634Ile	ENST00000322507	missense_variant	V/I	Gtt/Att	MODERATE	SNV
COL12A1	chr6	75146163.0	Missense_Mutation	p.Ala1500Val	ENST00000322507	missense_variant	A/V	gCt/gTt	MODERATE	SNV
COL12A1	chr6	75165737.0	Missense_Mutation	p.Asp918Ala	ENST00000322507	missense_variant	D/A	gAc/gCc	MODERATE	SNV
COL12A1	chr6	75183535.0	Missense_Mutation	p.Ser469Ile	ENST00000322507	missense_variant	S/I	aGt/aTt	MODERATE	SNV
COL12A1	chr6	75194854.0	Missense_Mutation	p.Arg56Ile	ENST00000322507	missense_variant	R/I	aGa/aTa	MODERATE	SNV
COL12A1	chr6	75152010.0	Missense_Mutation	p.Arg1286His	ENST00000322507	missense_variant	R/H	cGc/cAc	MODERATE	SNV
COL12A1	chr6	75124349.0	Silent	p.=	ENST00000322507	synonymous_variant	L	ctG/ctT	LOW	SNV
COL12A1	chr6	75183353.0	Missense_Mutation	p.Ile530Leu	ENST00000322507	missense_variant	I/L	Ata/Tta	MODERATE	SNV
COL12A1	chr6	75180995.0	Missense_Mutation	p.Ala703Val	ENST00000322507	missense_variant	A/V	gCg/gTg	MODERATE	SNV
COL12A1	chr6	75121380.0	Silent	p.=	ENST00000322507	synonymous_variant	D	gaC/gaT	LOW	SNV
COL12A1	chr6	75133923.0	Missense_Mutation	p.Ala1867Thr	ENST00000322507	missense_variant	A/T	Gca/Aca	MODERATE	SNV
COL12A1	chr6	75175236.0	Missense_Mutation	p.Pro838Thr	ENST00000322507	missense_variant	P/T	Cca/Aca	MODERATE	SNV
COL12A1	chr6	75103755.0	Splice_Site		ENST00000322507	splice_donor_variant			HIGH	SNV
COL12A1	chr6	75128329.0	Missense_Mutation	p.Asp2103Asn	ENST00000322507	missense_variant	D/N	Gat/Aat	MODERATE	SNV
COL12A1	chr6	75142122.0	Missense_Mutation	p.Asp1623Tyr	ENST00000322507	missense_variant	D/Y	Gac/Tac	MODERATE	SNV
COL12A1	chr6	75183926.0	Missense_Mutation	p.Ala406Thr	ENST00000322507	missense_variant	A/T	Gcc/Acc	MODERATE	SNV
COL12A1	chr6	75097303.0	Missense_Mutation	p.Phe2843Val	ENST00000322507	missense_variant	F/V	Ttc/Gtc	MODERATE	SNV
COL12A1	chr6	75125241.0	Nonsense_Mutation	p.Glu2165Ter	ENST00000322507	stop_gained	E/*	Gaa/Taa	HIGH	SNV
COL12A1	chr6	75183246.0	Silent	p.=	ENST00000322507	synonymous_variant	R	agG/agA	LOW	SNV
COL12A1	chr6	75130892.0	Silent	p.=	ENST00000322507	synonymous_variant	S	tcG/tcA	LOW	SNV
COL12A1	chr6	75156372.0	Frame_Shift_Del	p.Thr1046GlnfsTer7	ENST00000322507	frameshift_variant	P/X	ccC/cc	HIGH	deletion
COL12A1	chr6	75113708.0	Silent	p.=	ENST00000322507	synonymous_variant	T	acG/acA	LOW	SNV
COL12A1	chr6	75123367.0	Silent	p.=	ENST00000322507	synonymous_variant	T	acA/acG	LOW	SNV
COL12A1	chr6	75143283.0	Missense_Mutation	p.Arg1599Gln	ENST00000322507	missense_variant	R/Q	cGa/cAa	MODERATE	SNV
COL12A1	chr6	75151977.0	Missense_Mutation	p.Arg1297Ile	ENST00000322507	missense_variant	R/I	aGa/aTa	MODERATE	SNV
COL12A1	chr6	75192223.0	Missense_Mutation	p.Gly108Val	ENST00000322507	missense_variant	G/V	gGa/gTa	MODERATE	SNV
COL12A1	chr6	75115785.0	Missense_Mutation	p.Ala2566Thr	ENST00000322507	missense_variant;splice_region_variant	A/T	Gca/Aca	MODERATE	SNV
COL12A1	chr6	75132068.0	Missense_Mutation	p.Ala1937Thr	ENST00000322507	missense_variant	A/T	Gca/Aca	MODERATE	SNV
COL12A1	chr6	75175256.0	Missense_Mutation	p.Lys831Thr	ENST00000322507	missense_variant	K/T	aAa/aCa	MODERATE	SNV
COL12A1	chr6	75175187.0	Frame_Shift_Del	p.Gly854ValfsTer8	ENST00000322507	frameshift_variant	G/X	gGt/gt	HIGH	deletion
COL12A1	chr6	75090162.0	Frame_Shift_Del	p.Arg2964GlyfsTer113	ENST00000322507	frameshift_variant	G/X	ggG/gg	HIGH	deletion
COL12A1	chr6	75109020.0	Missense_Mutation	p.Ala2700Thr	ENST00000322507	missense_variant;splice_region_variant	A/T	Gca/Aca	MODERATE	SNV
COL12A1	chr6	75146177.0	Silent	p.=	ENST00000322507	synonymous_variant	Q	caG/caA	LOW	SNV
COL12A1	chr6	75113641.0	Missense_Mutation	p.Asp2601Asn	ENST00000322507	missense_variant	D/N	Gac/Aac	MODERATE	SNV
COL12A1	chr6	75130142.0	Silent	p.=	ENST00000322507	synonymous_variant	Q	caG/caA	LOW	SNV
COL12A1	chr6	75183407.0	Missense_Mutation	p.Tyr512Asp	ENST00000322507	missense_variant	Y/D	Tac/Gac	MODERATE	SNV
COL12A1	chr6	75119434.0	Missense_Mutation	p.Phe2376Leu	ENST00000322507	missense_variant	F/L	Ttc/Ctc	MODERATE	SNV
COL12A1	chr6	75143340.0	Missense_Mutation	p.Ser1580Asn	ENST00000322507	missense_variant	S/N	aGc/aAc	MODERATE	SNV
COL12A1	chr6	75133358.0	Missense_Mutation	p.Thr1910Asn	ENST00000322507	missense_variant	T/N	aCt/aAt	MODERATE	SNV
COL12A1	chr6	75113739.0	Missense_Mutation	p.Leu2568Pro	ENST00000322507	missense_variant	L/P	cTa/cCa	MODERATE	SNV
COL12A1	chr6	75202803.0	5'UTR		ENST00000322507	5_prime_UTR_variant			MODIFIER	SNV
COL12A1	chr6	75134840.0	Missense_Mutation	p.Arg1804Trp	ENST00000322507	missense_variant	R/W	Cgg/Tgg	MODERATE	SNV
COL12A1	chr6	75151278.0	Frame_Shift_Del	p.Asn1337MetfsTer7	ENST00000322507	frameshift_variant	N/X	aAt/at	HIGH	deletion
COL12A1	chr6	75131983.0	Missense_Mutation	p.Arg1965His	ENST00000322507	missense_variant	R/H	cGc/cAc	MODERATE	SNV
COL12A1	chr6	75137435.0	Splice_Site		ENST00000322507	splice_donor_variant			HIGH	SNV
COL12A1	chr6	75194851.0	Missense_Mutation	p.Ile57Thr	ENST00000322507	missense_variant	I/T	aTa/aCa	MODERATE	SNV
COL12A1	chr6	75090270.0	Silent	p.=	ENST00000322507	synonymous_variant	L	ctG/ctA	LOW	SNV
COL12A1	chr6	75115854.0	Missense_Mutation	p.Glu2543Gln	ENST00000322507	missense_variant	E/Q	Gag/Cag	MODERATE	SNV
COL12A1	chr6	75145455.0	Missense_Mutation	p.Val1521Met	ENST00000322507	missense_variant;splice_region_variant	V/M	Gtg/Atg	MODERATE	SNV
COL12A1	chr6	75097269.0	Missense_Mutation	p.Gly2854Asp	ENST00000322507	missense_variant	G/D	gGc/gAc	MODERATE	SNV
COL12A1	chr6	75151925.0	Silent	p.=	ENST00000322507	synonymous_variant	D	gaC/gaT	LOW	SNV
COL12A1	chr6	75155705.0	Missense_Mutation	p.Val1134Leu	ENST00000322507	missense_variant	V/L	Gtg/Ctg	MODERATE	SNV
COL12A1	chr6	75151965.0	Missense_Mutation	p.Arg1301Leu	ENST00000322507	missense_variant	R/L	cGa/cTa	MODERATE	SNV
COL12A1	chr6	75138333.0	Silent	p.=	ENST00000322507	synonymous_variant	I	atC/atA	LOW	SNV
COL12A1	chr6	75125136.0	Missense_Mutation	p.Gly2200Arg	ENST00000322507	missense_variant	G/R	Ggc/Cgc	MODERATE	SNV
COL12A1	chr6	75130133.0	Silent	p.=	ENST00000322507	synonymous_variant	R	agG/agA	LOW	SNV
COL12A1	chr6	75181211.0	Missense_Mutation	p.Ala631Asp	ENST00000322507	missense_variant;splice_region_variant	A/D	gCt/gAt	MODERATE	SNV
COL12A1	chr6	75087680.0	Frame_Shift_Ins	p.Gly3027TrpfsTer19	ENST00000322507	frameshift_variant	P/PX	cct/ccCt	HIGH	insertion
COL12A1	chr6	75102684.0	Frame_Shift_Ins	p.Gly2777TrpfsTer37	ENST00000322507	frameshift_variant	P/PX	cct/ccCt	HIGH	insertion
COL12A1	chr6	75123356.0	Frame_Shift_Del	p.Pro2307LeufsTer21	ENST00000322507	frameshift_variant	P/X	cCt/ct	HIGH	deletion
COL12A1	chr6	75128382.0	Frame_Shift_Ins	p.Leu2085HisfsTer4	ENST00000322507	frameshift_variant	L/HX	ctg/cAtg	HIGH	insertion
COL12A1	chr6	75130959.0	Missense_Mutation	p.Arg1987His	ENST00000322507	missense_variant	R/H	cGc/cAc	MODERATE	SNV
COL12A1	chr6	75155794.0	Missense_Mutation	p.Arg1104Gln	ENST00000322507	missense_variant	R/Q	cGa/cAa	MODERATE	SNV
COL12A1	chr6	75189581.0	Frame_Shift_Ins	p.Ile210AsnfsTer4	ENST00000322507	frameshift_variant	I/NX	att/aAtt	HIGH	insertion
COL12A1	chr6	75087687.0	Missense_Mutation	p.Gly3024Ala	ENST00000322507	missense_variant	G/A	gGc/gCc	MODERATE	SNV
COL12A1	chr6	75117523.0	Missense_Mutation	p.Val2460Met	ENST00000322507	missense_variant	V/M	Gtg/Atg	MODERATE	SNV
COL12A1	chr6	75152396.0	Missense_Mutation	p.Val1218Met	ENST00000322507	missense_variant	V/M	Gtg/Atg	MODERATE	SNV
COL12A1	chr6	75113231.0	Missense_Mutation	p.Lys2641Asn	ENST00000322507	missense_variant	K/N	aaG/aaT	MODERATE	SNV
COL12A1	chr6	75143325.0	Missense_Mutation	p.Phe1585Cys	ENST00000322507	missense_variant	F/C	tTt/tGt	MODERATE	SNV
COL12A1	chr6	75175217.0	Missense_Mutation	p.Tyr844Cys	ENST00000322507	missense_variant	Y/C	tAt/tGt	MODERATE	SNV
COL12A1	chr6	75183419.0	Missense_Mutation	p.Asn508His	ENST00000322507	missense_variant	N/H	Aac/Cac	MODERATE	SNV
COL12A1	chr6	75154428.0	Missense_Mutation	p.Ile1185Phe	ENST00000322507	missense_variant	I/F	Att/Ttt	MODERATE	SNV
COL12A1	chr6	75151256.0	Missense_Mutation	p.Lys1344Asn	ENST00000322507	missense_variant	K/N	aaG/aaT	MODERATE	SNV
COL12A1	chr6	75165762.0	Missense_Mutation	p.Asp910Tyr	ENST00000322507	missense_variant	D/Y	Gat/Tat	MODERATE	SNV
COL12A1	chr6	75124067.0	Missense_Mutation	p.Arg2251His	ENST00000322507	missense_variant	R/H	cGt/cAt	MODERATE	SNV
COL12A1	chr6	75165692.0	Missense_Mutation	p.Arg933His	ENST00000322507	missense_variant	R/H	cGc/cAc	MODERATE	SNV
COL12A1	chr6	75115885.0	Missense_Mutation	p.Lys2532Asn	ENST00000322507	missense_variant	K/N	aaG/aaT	MODERATE	SNV
COL12A1	chr6	75148360.0	Nonsense_Mutation	p.Glu1429Ter	ENST00000322507	stop_gained;splice_region_variant	E/*	Gaa/Taa	HIGH	SNV
COL12A1	chr6	75155763.0	Silent	p.=	ENST00000322507	synonymous_variant	V	gtG/gtT	LOW	SNV
COL12A1	chr6	75143299.0	Missense_Mutation	p.Arg1594Cys	ENST00000322507	missense_variant	R/C	Cgt/Tgt	MODERATE	SNV
COL12A1	chr6	75124000.0	Frame_Shift_Del	p.Phe2273LeufsTer20	ENST00000322507	frameshift_variant	F/X	ttT/tt	HIGH	deletion
COL12A1	chr6	75119374.0	Missense_Mutation	p.Tyr2396His	ENST00000322507	missense_variant	Y/H	Tac/Cac	MODERATE	SNV
COL12A1	chr6	75130227.0	Missense_Mutation	p.Arg2025His	ENST00000322507	missense_variant	R/H	cGc/cAc	MODERATE	SNV
COL12A1	chr6	75123335.0	Missense_Mutation	p.Arg2314Pro	ENST00000322507	missense_variant	R/P	cGg/cCg	MODERATE	SNV
COL12A1	chr6	75131948.0	Missense_Mutation	p.Ser1977Pro	ENST00000322507	missense_variant	S/P	Tca/Cca	MODERATE	SNV
COL12A1	chr6	75119137.0	Silent	p.=	ENST00000322507	synonymous_variant	G	ggC/ggA	LOW	SNV
COL12A1	chr6	75086515.0	3'UTR		ENST00000322507	3_prime_UTR_variant			MODIFIER	SNV
COL12A1	chr6	75151924.0	Missense_Mutation	p.Asp1315Asn	ENST00000322507	missense_variant	D/N	Gat/Aat	MODERATE	SNV
COL12A1	chr6	75119389.0	Missense_Mutation	p.Leu2391Ile	ENST00000322507	missense_variant	L/I	Ctc/Atc	MODERATE	SNV
COL5A1	chr9	134727274.0	Missense_Mutation	p.Ile221Met	ENST00000371817	missense_variant	I/M	atC/atG	MODERATE	SNV
COL5A1	chr9	134786009.0	Frame_Shift_Del	p.Pro870GlnfsTer204	ENST00000371817	frameshift_variant	V/X	gtC/gt	HIGH	deletion
COL5A1	chr9	134699971.0	Missense_Mutation	p.Ala114Thr	ENST00000371817	missense_variant	A/T	Gcc/Acc	MODERATE	SNV
COL5A1	chr9	134825898.0	Silent	p.=	ENST00000371817	synonymous_variant	S	tcC/tcT	LOW	SNV
COL5A1	chr9	134806261.0	Missense_Mutation	p.Gly1111Arg	ENST00000371817	missense_variant	G/R	Gga/Aga	MODERATE	SNV
COL5A1	chr9	134815604.0	Missense_Mutation	p.Gly1348Ala	ENST00000371817	missense_variant	G/A	gGc/gCc	MODERATE	SNV
COL5A1	chr9	134824719.0	Silent	p.=	ENST00000371817	synonymous_variant	D	gaC/gaT	LOW	SNV
COL5A1	chr9	134818664.0	Silent	p.=	ENST00000371817	synonymous_variant	A	gcC/gcT	LOW	SNV
COL5A1	chr9	134730388.0	Frame_Shift_Del	p.Glu361ArgfsTer197	ENST00000371817	frameshift_variant	E/X	gaG/ga	HIGH	deletion
COL5A1	chr9	134820197.0	Missense_Mutation	p.Gly1510Ser	ENST00000371817	missense_variant	G/S	Ggc/Agc	MODERATE	SNV
COL5A1	chr9	134830000.0	Nonsense_Mutation	p.Glu1698Ter	ENST00000371817	stop_gained	E/*	Gaa/Taa	HIGH	SNV
COL5A1	chr9	134728674.0	Missense_Mutation	p.Thr264Met	ENST00000371817	missense_variant	T/M	aCg/aTg	MODERATE	SNV
COL5A1	chr9	134810290.0	Frame_Shift_Del	p.Asp1172ThrfsTer104	ENST00000371817	frameshift_variant	K/X	aaG/aa	HIGH	deletion
COL5A1	chr9	134814030.0	Frame_Shift_Del	p.Pro1302ArgfsTer186	ENST00000371817	frameshift_variant	G/X	ggC/gg	HIGH	deletion
COL5A1	chr9	134796901.0	Splice_Region	p.=	ENST00000371817	splice_region_variant;synonymous_variant	P	ccT/ccA	LOW	SNV
COL5A1	chr9	134750544.0	Frame_Shift_Del	p.Pro501LeufsTer57	ENST00000371817	frameshift_variant;splice_region_variant	G/X	ggC/gg	HIGH	deletion
COL5A1	chr9	134750586.0	Silent	p.=	ENST00000371817	synonymous_variant	P	ccC/ccA	LOW	SNV
COL5A1	chr9	134758282.0	Missense_Mutation	p.Glu641Lys	ENST00000371817	missense_variant	E/K	Gag/Aag	MODERATE	SNV
COL5A1	chr9	134761931.0	Missense_Mutation	p.Pro648Ala	ENST00000371817	missense_variant	P/A	Cct/Gct	MODERATE	SNV
COL5A1	chr9	134796895.0	Frame_Shift_Del	p.Pro966LeufsTer108	ENST00000371817	frameshift_variant	G/X	ggC/gg	HIGH	deletion
COL5A1	chr9	134731636.0	Silent	p.=	ENST00000371817	synonymous_variant	P	ccG/ccA	LOW	SNV
COL5A1	chr9	134728772.0	Missense_Mutation	p.Val297Met	ENST00000371817	missense_variant	V/M	Gtg/Atg	MODERATE	SNV
COL5A1	chr9	134750807.0	Silent	p.=	ENST00000371817	synonymous_variant	G	ggC/ggT	LOW	SNV
COL5A1	chr9	134805180.0	Missense_Mutation	p.Gly1075Asp	ENST00000371817	missense_variant	G/D	gGc/gAc	MODERATE	SNV
COL5A1	chr9	134700057.0	Silent	p.=	ENST00000371817	synonymous_variant	D	gaC/gaT	LOW	SNV
COL5A1	chr9	134728709.0	Missense_Mutation	p.Glu276Lys	ENST00000371817	missense_variant	E/K	Gaa/Aaa	MODERATE	SNV
COL5A1	chr9	134732126.0	Missense_Mutation	p.Pro463Leu	ENST00000371817	missense_variant;splice_region_variant	P/L	cCg/cTg	MODERATE	SNV
COL5A1	chr9	134812490.0	Silent	p.=	ENST00000371817	synonymous_variant	D	gaC/gaT	LOW	SNV
COL5A1	chr9	134750557.0	Missense_Mutation	p.Pro504Thr	ENST00000371817	missense_variant	P/T	Cca/Aca	MODERATE	SNV
COL5A1	chr9	134801982.0	Frame_Shift_Ins	p.Gly997ArgfsTer17	ENST00000371817	frameshift_variant	G/GX	ggc/ggCc	HIGH	insertion
COL5A1	chr9	134815605.0	Frame_Shift_Del	p.Gly1351GlufsTer137	ENST00000371817	frameshift_variant	G/X	ggC/gg	HIGH	deletion
COL5A1	chr9	134823430.0	Silent	p.=	ENST00000371817	synonymous_variant	P	ccG/ccA	LOW	SNV
COL5A1	chr9	134824654.0	Missense_Mutation	p.Arg1585Trp	ENST00000371817	missense_variant	R/W	Cgg/Tgg	MODERATE	SNV
COL5A1	chr9	134835040.0	Missense_Mutation	p.Ala1736Thr	ENST00000371817	missense_variant	A/T	Gcc/Acc	MODERATE	SNV
COL5A1	chr9	134842373.0	3'UTR		ENST00000371817	3_prime_UTR_variant			MODIFIER	SNV
COL5A1	chr9	134763718.0	Missense_Mutation	p.Arg672Met	ENST00000371817	missense_variant	R/M	aGg/aTg	MODERATE	SNV
COL5A1	chr9	134818893.0	Missense_Mutation	p.Gly1462Ser	ENST00000371817	missense_variant	G/S	Ggc/Agc	MODERATE	SNV
COL5A1	chr9	134819039.0	Missense_Mutation	p.Pro1478Ser	ENST00000371817	missense_variant	P/S	Ccc/Tcc	MODERATE	SNV
COL5A1	chr9	134820143.0	Missense_Mutation	p.Gly1492Ser	ENST00000371817	missense_variant	G/S	Ggt/Agt	MODERATE	SNV
COL5A1	chr9	134731583.0	Missense_Mutation	p.Asp418Asn	ENST00000371817	missense_variant	D/N	Gac/Aac	MODERATE	SNV
COL5A1	chr9	134765735.0	Splice_Site		ENST00000371817	splice_donor_variant			HIGH	SNV
COL5A1	chr9	134750617.0	Splice_Site		ENST00000371817	splice_donor_variant			HIGH	SNV
COL5A1	chr9	134784987.0	Splice_Site	p.Glu830GlyfsTer14	ENST00000371817	splice_acceptor_variant			HIGH	insertion
COL5A1	chr9	134750554.0	Missense_Mutation	p.Arg503Cys	ENST00000371817	missense_variant	R/C	Cgc/Tgc	MODERATE	SNV
COL5A1	chr9	134824657.0	Missense_Mutation	p.Asn1586Tyr	ENST00000371817	missense_variant	N/Y	Aac/Tac	MODERATE	SNV
COL5A1	chr9	134825878.0	Missense_Mutation	p.Val1681Ile	ENST00000371817	missense_variant	V/I	Gtc/Atc	MODERATE	SNV
COL5A1	chr9	134806249.0	Missense_Mutation	p.Pro1107Ser	ENST00000371817	missense_variant	P/S	Cct/Tct	MODERATE	SNV
COL5A1	chr9	134824683.0	Silent	p.=	ENST00000371817	synonymous_variant	D	gaC/gaT	LOW	SNV
COL5A1	chr9	134728687.0	Silent	p.=	ENST00000371817	synonymous_variant	G	ggC/ggT	LOW	SNV
COL5A1	chr9	134812664.0	Silent	p.=	ENST00000371817	synonymous_variant	P	ccA/ccG	LOW	SNV
COL5A1	chr9	134820222.0	Missense_Mutation	p.Gln1518Arg	ENST00000371817	missense_variant;splice_region_variant	Q/R	cAg/cGg	MODERATE	SNV
COL5A1	chr9	134842179.0	Missense_Mutation	p.Thr1798Met	ENST00000371817	missense_variant	T/M	aCg/aTg	MODERATE	SNV
COL5A1	chr9	134750872.0	Missense_Mutation	p.Gln551Pro	ENST00000371817	missense_variant	Q/P	cAg/cCg	MODERATE	SNV
COL5A1	chr9	134699966.0	Missense_Mutation	p.Ser112Asn	ENST00000371817	missense_variant	S/N	aGc/aAc	MODERATE	SNV
COL5A1	chr9	134754309.0	Missense_Mutation	p.Gly604Arg	ENST00000371817	missense_variant	G/R	Ggg/Agg	MODERATE	SNV
COL5A1	chr9	134801983.0	Frame_Shift_Del	p.Gly997AlafsTer77	ENST00000371817	frameshift_variant	G/X	ggC/gg	HIGH	deletion
COL5A1	chr9	134817061.0	Frame_Shift_Del	p.Pro1388LeufsTer100	ENST00000371817	frameshift_variant	S/X	tcG/tc	HIGH	deletion
COL5A1	chr9	134738512.0	Silent	p.=	ENST00000371817	synonymous_variant	P	ccC/ccT	LOW	SNV
COL5A1	chr9	134738749.0	Missense_Mutation	p.Leu479Ile	ENST00000371817	missense_variant	L/I	Ctt/Att	MODERATE	SNV
COL5A1	chr9	134802967.0	Missense_Mutation	p.Pro1029Leu	ENST00000371817	missense_variant	P/L	cCg/cTg	MODERATE	SNV
COL5A1	chr9	134815628.0	Missense_Mutation	p.Ala1356Val	ENST00000371817	missense_variant;splice_region_variant	A/V	gCg/gTg	MODERATE	SNV
COL5A1	chr9	134830001.0	Missense_Mutation	p.Glu1698Ala	ENST00000371817	missense_variant	E/A	gAa/gCa	MODERATE	SNV
COL5A1	chr9	134728723.0	Silent	p.=	ENST00000371817	synonymous_variant	Y	taC/taT	LOW	SNV
COL5A1	chr9	134818883.0	Silent	p.=	ENST00000371817	synonymous_variant	D	gaC/gaT	LOW	SNV
COL5A1	chr9	134823002.0	Missense_Mutation	p.Pro1538Leu	ENST00000371817	missense_variant	P/L	cCg/cTg	MODERATE	SNV
COL5A1	chr9	134727372.0	Missense_Mutation	p.Ser254Leu	ENST00000371817	missense_variant	S/L	tCg/tTg	MODERATE	SNV
COL5A1	chr9	134728727.0	Missense_Mutation	p.Asp282Tyr	ENST00000371817	missense_variant	D/Y	Gac/Tac	MODERATE	SNV
COL5A1	chr9	134731639.0	Silent	p.=	ENST00000371817	synonymous_variant	A	gcG/gcA	LOW	SNV
COL5A1	chr9	134782704.0	Missense_Mutation	p.Gly823Asp	ENST00000371817	missense_variant	G/D	gGc/gAc	MODERATE	SNV
COL5A1	chr9	134817802.0	Missense_Mutation	p.Glu1401Lys	ENST00000371817	missense_variant	E/K	Gaa/Aaa	MODERATE	SNV
COL5A1	chr9	134727265.0	Splice_Site		ENST00000371817	splice_acceptor_variant			HIGH	SNV
COL5A1	chr9	134795266.0	Missense_Mutation	p.Pro917Leu	ENST00000371817	missense_variant	P/L	cCg/cTg	MODERATE	SNV
COL5A1	chr9	134754287.0	Silent	p.=	ENST00000371817	synonymous_variant	V	gtG/gtA	LOW	SNV
COL5A1	chr9	134798433.0	Missense_Mutation	p.Pro975Leu	ENST00000371817	missense_variant	P/L	cCa/cTa	MODERATE	SNV
COL5A1	chr9	134780118.0	Missense_Mutation	p.Arg801His	ENST00000371817	missense_variant	R/H	cGt/cAt	MODERATE	SNV
COL5A1	chr9	134795309.0	Frame_Shift_Del	p.Lys933ArgfsTer141	ENST00000371817	frameshift_variant	G/X	ggC/gg	HIGH	deletion
COL5A1	chr9	134766461.0	Missense_Mutation	p.Thr699Met	ENST00000371817	missense_variant	T/M	aCg/aTg	MODERATE	SNV
COL5A1	chr9	134732127.0	Splice_Region	p.=	ENST00000371817	splice_region_variant;synonymous_variant	P	ccG/ccA	LOW	SNV
COL5A1	chr9	134805191.0	Missense_Mutation	p.Pro1079Ser	ENST00000371817	missense_variant	P/S	Ccc/Tcc	MODERATE	SNV
COL5A1	chr9	134815597.0	Missense_Mutation	p.Asp1346Tyr	ENST00000371817	missense_variant	D/Y	Gat/Tat	MODERATE	SNV
COL5A1	chr9	134701261.0	Silent	p.=	ENST00000371817	synonymous_variant	S	agC/agT	LOW	SNV
COL5A1	chr9	134820206.0	Missense_Mutation	p.Gly1513Ser	ENST00000371817	missense_variant	G/S	Ggt/Agt	MODERATE	SNV
COL5A1	chr9	134750550.0	Silent	p.=	ENST00000371817	synonymous_variant	P	ccT/ccC	LOW	SNV
COL5A1	chr9	134806233.0	Silent	p.=	ENST00000371817	synonymous_variant	I	atC/atT	LOW	SNV
COL5A1	chr9	134801989.0	Silent	p.=	ENST00000371817	synonymous_variant	P	ccC/ccT	LOW	SNV
DNAH14	chr1	225351709.0	Missense_Mutation	p.Cys2891Gly	ENST00000445597	missense_variant	C/G	Tgc/Ggc	MODERATE	SNV
DNAH14	chr1	225380278.0	Missense_Mutation	p.Met3169Thr	ENST00000445597	missense_variant	M/T	aTg/aCg	MODERATE	SNV
DNAH14	chr1	225206057.0	Missense_Mutation	p.Thr1595Ala	ENST00000445597	missense_variant	T/A	Aca/Gca	MODERATE	SNV
DNAH14	chr1	225258068.0	Intron		ENST00000445597	intron_variant			MODIFIER	SNV
DNAH14	chr1	225360813.0	Intron		ENST00000445597	intron_variant			MODIFIER	SNV
DNAH14	chr1	225152863.0	Missense_Mutation	p.Arg1299Cys	ENST00000445597	missense_variant	R/C	Cgc/Tgc	MODERATE	SNV
DNAH14	chr1	225140845.0	Silent	p.=	ENST00000445597	synonymous_variant	H	caC/caT	LOW	SNV
DNAH14	chr1	225119227.0	Intron		ENST00000445597	intron_variant			MODIFIER	SNV
DNAH14	chr1	225152030.0	Missense_Mutation	p.Arg1229Cys	ENST00000445597	missense_variant	R/C	Cgt/Tgt	MODERATE	SNV
DNAH14	chr1	225353848.0	Intron		ENST00000445597	intron_variant			MODIFIER	SNV
DNAH14	chr1	225152050.0	Silent	p.=	ENST00000445597	synonymous_variant	A	gcG/gcA	LOW	SNV
DNAH14	chr1	224967720.0	Intron		ENST00000445597	intron_variant			MODIFIER	SNV
DNAH14	chr1	225159362.0	Silent	p.=	ENST00000445597	synonymous_variant	I	atC/atT	LOW	SNV
DNAH14	chr1	225273027.0	Intron		ENST00000445597	intron_variant			MODIFIER	SNV
DNAH14	chr1	225082723.0	Intron		ENST00000445597	intron_variant			MODIFIER	SNV
DNAH14	chr1	225259242.0	Intron		ENST00000445597	intron_variant			MODIFIER	deletion
DNAH14	chr1	225192737.0	Missense_Mutation	p.Asn1477Lys	ENST00000445597	missense_variant	N/K	aaT/aaA	MODERATE	SNV
DNAH14	chr1	225007426.0	Missense_Mutation	p.Arg349Gln	ENST00000445597	missense_variant	R/Q	cGa/cAa	MODERATE	SNV
DNAH14	chr1	225338178.0	Intron		ENST00000445597	intron_variant			MODIFIER	SNV
DNAH14	chr1	225340682.0	Missense_Mutation	p.Asn2657Lys	ENST00000445597	missense_variant	N/K	aaT/aaG	MODERATE	SNV
DNAH14	chr1	225364794.0	Intron		ENST00000445597	intron_variant			MODIFIER	SNV
DNAH14	chr1	225367938.0	Intron		ENST00000445597	intron_variant			MODIFIER	SNV
DNAH14	chr1	224967751.0	Intron		ENST00000445597	intron_variant			MODIFIER	deletion
DNAH14	chr1	225152754.0	Silent	p.=	ENST00000445597	synonymous_variant	A	gcA/gcG	LOW	SNV
DNAH14	chr1	225002918.0	Intron		ENST00000445597	intron_variant			MODIFIER	SNV
DNAH14	chr1	225043781.0	Intron		ENST00000445597	intron_variant			MODIFIER	SNV
DNAH14	chr1	225338121.0	Intron		ENST00000445597	intron_variant			MODIFIER	deletion
DNAH14	chr1	225097235.0	Intron		ENST00000445597	intron_variant			MODIFIER	SNV
DNAH14	chr1	225153754.0	Missense_Mutation	p.His1307Arg	ENST00000445597	missense_variant	H/R	cAt/cGt	MODERATE	SNV
DNAH14	chr1	225380285.0	Silent	p.=	ENST00000445597	synonymous_variant	S	tcA/tcG	LOW	SNV
DNAH14	chr1	225023636.0	Frame_Shift_Del	p.Lys396ArgfsTer4	ENST00000445597	frameshift_variant	K/X	AAa/a	HIGH	deletion
DNAH14	chr1	225152031.0	Missense_Mutation	p.Arg1229His	ENST00000445597	missense_variant	R/H	cGt/cAt	MODERATE	SNV
DNAH14	chr1	225337448.0	Frame_Shift_Ins	p.Ile2559AsnfsTer2	ENST00000445597	frameshift_variant	-/X	-/A	HIGH	insertion
DNAH14	chr1	225119289.0	Intron		ENST00000445597	intron_variant			MODIFIER	deletion
DNAH14	chr1	225374822.0	Intron		ENST00000445597	intron_variant			MODIFIER	SNV
DNAH14	chr1	225346104.0	Silent	p.=	ENST00000445597	synonymous_variant	A	gcG/gcT	LOW	SNV
DNAH14	chr1	225147139.0	Intron		ENST00000445597	intron_variant			MODIFIER	SNV
DNAH14	chr1	225265185.0	Missense_Mutation	p.Asn1863Thr	ENST00000445597	missense_variant	N/T	aAt/aCt	MODERATE	SNV
DNAH14	chr1	225340654.0	Missense_Mutation	p.Leu2648His	ENST00000445597	missense_variant	L/H	cTt/cAt	MODERATE	SNV
DNAH14	chr1	225324284.0	Silent	p.=	ENST00000445597	synonymous_variant	L	ctG/ctC	LOW	SNV
DNAH14	chr1	225144525.0	Missense_Mutation	p.Arg1145Gln	ENST00000445597	missense_variant	R/Q	cGa/cAa	MODERATE	SNV
DNAH14	chr1	225265367.0	Missense_Mutation	p.Arg1924Trp	ENST00000445597	missense_variant;splice_region_variant	R/W	Cgg/Tgg	MODERATE	SNV
DNAH14	chr1	225023841.0	Frame_Shift_Del	p.Lys466ArgfsTer42	ENST00000445597	frameshift_variant	E/X	gAa/ga	HIGH	deletion
DNAH14	chr1	225364888.0	Intron		ENST00000445597	intron_variant			MODIFIER	SNV
DNAH14	chr1	225240735.0	Missense_Mutation	p.Pro1794Ser	ENST00000445597	missense_variant	P/S	Ccc/Tcc	MODERATE	SNV
DNAH14	chr1	224955033.0	Missense_Mutation	p.Lys228Thr	ENST00000445597	missense_variant	K/T	aAg/aCg	MODERATE	SNV
DNAH14	chr1	224967531.0	Missense_Mutation	p.Thr327Ile	ENST00000445597	missense_variant	T/I	aCt/aTt	MODERATE	SNV
DNAH14	chr1	225043051.0	Nonsense_Mutation	p.Glu588Ter	ENST00000445597	stop_gained	E/*	Gaa/Taa	HIGH	SNV
DNAH14	chr1	225079307.0	Missense_Mutation	p.Ser776Tyr	ENST00000445597	missense_variant	S/Y	tCt/tAt	MODERATE	SNV
DNAH14	chr1	225140814.0	Missense_Mutation	p.Ser1033Tyr	ENST00000445597	missense_variant	S/Y	tCt/tAt	MODERATE	SNV
DNAH14	chr1	225240724.0	Missense_Mutation	p.Ile1790Thr	ENST00000445597	missense_variant	I/T	aTa/aCa	MODERATE	SNV
DNAH14	chr1	225265322.0	Missense_Mutation	p.Leu1909Val	ENST00000445597	missense_variant	L/V	Tta/Gta	MODERATE	SNV
DNAH14	chr1	225273048.0	Intron		ENST00000445597	intron_variant			MODIFIER	SNV
DNAH14	chr1	225289927.0	Missense_Mutation	p.Ala2026Thr	ENST00000445597	missense_variant	A/T	Gcc/Acc	MODERATE	SNV
DNAH14	chr1	225333473.0	Intron		ENST00000445597	intron_variant			MODIFIER	SNV
DNAH14	chr1	225360756.0	Intron		ENST00000445597	intron_variant			MODIFIER	SNV
DNAH14	chr1	225364860.0	Intron		ENST00000445597	intron_variant			MODIFIER	SNV
DNAH14	chr1	225381545.0	Missense_Mutation	p.Ser3238Tyr	ENST00000445597	missense_variant	S/Y	tCt/tAt	MODERATE	SNV
DNAH14	chr1	225038693.0	Splice_Site		ENST00000445597	splice_acceptor_variant			HIGH	SNV
DNAH14	chr1	225207005.0	Missense_Mutation	p.Ser1648Leu	ENST00000445597	missense_variant	S/L	tCa/tTa	MODERATE	SNV
DNAH14	chr1	225272059.0	Intron		ENST00000445597	intron_variant			MODIFIER	SNV
DNAH14	chr1	225333405.0	Intron		ENST00000445597	intron_variant			MODIFIER	SNV
DNAH14	chr1	224960234.0	Intron		ENST00000445597	intron_variant			MODIFIER	insertion
DNAH14	chr1	225289910.0	Missense_Mutation	p.Lys2020Arg	ENST00000445597	missense_variant	K/R	aAa/aGa	MODERATE	SNV
DNAH14	chr1	225079420.0	Missense_Mutation	p.Phe814Leu	ENST00000445597	missense_variant	F/L	Ttt/Ctt	MODERATE	SNV
DNAH14	chr1	225192766.0	Missense_Mutation	p.Tyr1487Phe	ENST00000445597	missense_variant	Y/F	tAt/tTt	MODERATE	SNV
DNAH14	chr1	224964552.0	Silent	p.=	ENST00000445597	synonymous_variant	P	ccG/ccA	LOW	SNV
DNAH14	chr1	225192825.0	Nonsense_Mutation	p.Arg1507Ter	ENST00000445597	stop_gained	R/*	Cga/Tga	HIGH	SNV
DNAH14	chr1	225333367.0	Intron		ENST00000445597	intron_variant			MODIFIER	SNV
DNAH14	chr1	225360719.0	Intron		ENST00000445597	intron_variant			MODIFIER	SNV
DNAH14	chr1	225337322.0	Silent	p.=	ENST00000445597	synonymous_variant	A	gcC/gcT	LOW	SNV
DNAH14	chr1	224955056.0	Nonsense_Mutation	p.Val236AlafsTer3	ENST00000445597	stop_gained;frameshift_variant	V/AS*VX	gtt/gCTTCTTAGGTtt	HIGH	insertion
DNAH14	chr1	225002898.0	Intron		ENST00000445597	intron_variant			MODIFIER	insertion
DNAH14	chr1	225042891.0	In_Frame_Ins	p.Phe534_Glu535insAsnLeu	ENST00000445597	inframe_insertion	-/NL	-/AATTTA	MODERATE	insertion
DNAH14	chr1	225042893.0	Frame_Shift_Ins	p.Val536TyrfsTer11	ENST00000445597	frameshift_variant	E/EYX	gaa/gaATACa	HIGH	insertion
DNAH14	chr1	225119288.0	Intron		ENST00000445597	intron_variant			MODIFIER	insertion
DNAH14	chr1	225396645.0	Intron		ENST00000445597	intron_variant			MODIFIER	SNV
DNAH14	chr1	225257977.0	Intron		ENST00000445597	intron_variant			MODIFIER	SNV
DNAH14	chr1	225289906.0	Frame_Shift_Del	p.Thr2021HisfsTer9	ENST00000445597	frameshift_variant	K/X	Aaa/aa	HIGH	deletion
DNAH14	chr1	225392330.0	Missense_Mutation	p.Arg3347Gln	ENST00000445597	missense_variant	R/Q	cGa/cAa	MODERATE	SNV
DNAH14	chr1	225192877.0	Missense_Mutation	p.Leu1524Pro	ENST00000445597	missense_variant	L/P	cTc/cCc	MODERATE	SNV
ASPM	chr1	197139780.0	Frame_Shift_Del	p.Lys671AsnfsTer3	ENST00000367409	frameshift_variant	K/X	aaA/aa	HIGH	deletion
ASPM	chr1	197100938.0	Silent	p.=	ENST00000367409	synonymous_variant	N	aaC/aaT	LOW	SNV
ASPM	chr1	197093252.0	Missense_Mutation	p.Ala3032Thr	ENST00000367409	missense_variant	A/T	Gct/Act	MODERATE	SNV
ASPM	chr1	197101355.0	Missense_Mutation	p.Gln2632His	ENST00000367409	missense_variant	Q/H	caG/caT	MODERATE	SNV
ASPM	chr1	197117871.0	Missense_Mutation	p.Arg1328Ile	ENST00000367409	missense_variant	R/I	aGa/aTa	MODERATE	SNV
ASPM	chr1	197104777.0	Missense_Mutation	p.Val1492Ile	ENST00000367409	missense_variant	V/I	Gtt/Att	MODERATE	SNV
ASPM	chr1	197103635.0	Frame_Shift_Ins	p.Leu1872PhefsTer24	ENST00000367409	frameshift_variant	L/FX	ttg/ttTg	HIGH	insertion
ASPM	chr1	197101024.0	Nonsense_Mutation	p.Arg2743Ter	ENST00000367409	stop_gained	R/*	Cga/Tga	HIGH	SNV
ASPM	chr1	197102256.0	Missense_Mutation	p.Arg2332Gln	ENST00000367409	missense_variant	R/Q	cGa/cAa	MODERATE	SNV
ASPM	chr1	197104242.0	Missense_Mutation	p.Val1670Ala	ENST00000367409	missense_variant	V/A	gTt/gCt	MODERATE	SNV
ASPM	chr1	197130044.0	Nonsense_Mutation	p.Glu834Ter	ENST00000367409	stop_gained	E/*	Gaa/Taa	HIGH	SNV
ASPM	chr1	197143334.0	Missense_Mutation	p.Leu306Phe	ENST00000367409	missense_variant	L/F	ttG/ttT	MODERATE	SNV
ASPM	chr1	197117932.0	Missense_Mutation	p.Ala1308Ser	ENST00000367409	missense_variant	A/S	Gca/Tca	MODERATE	SNV
ASPM	chr1	197103714.0	Missense_Mutation	p.Ser1846Tyr	ENST00000367409	missense_variant	S/Y	tCt/tAt	MODERATE	SNV
ASPM	chr1	197143270.0	Missense_Mutation	p.Ala328Thr	ENST00000367409	missense_variant	A/T	Gct/Act	MODERATE	SNV
ASPM	chr1	197104211.0	Frame_Shift_Ins	p.Asn1680LysfsTer11	ENST00000367409	frameshift_variant	N/KX	aat/aaAt	HIGH	insertion
ASPM	chr1	197090339.0	Frame_Shift_Ins	p.Ile3229AsnfsTer2	ENST00000367409	frameshift_variant	I/NX	att/aAtt	HIGH	insertion
ASPM	chr1	197101182.0	Missense_Mutation	p.Arg2690Gln	ENST00000367409	missense_variant	R/Q	cGg/cAg	MODERATE	SNV
ASPM	chr1	197102159.0	Missense_Mutation	p.Ile2364Met	ENST00000367409	missense_variant	I/M	atC/atG	MODERATE	SNV
ASPM	chr1	197124873.0	Silent	p.=	ENST00000367409	synonymous_variant	F	ttT/ttC	LOW	SNV
ASPM	chr1	197096021.0	Silent	p.=	ENST00000367409	synonymous_variant	F	ttC/ttT	LOW	SNV
ASPM	chr1	197084204.0	3'UTR		ENST00000367409	3_prime_UTR_variant			MODIFIER	insertion
ASPM	chr1	197142932.0	Missense_Mutation	p.Glu440Asp	ENST00000367409	missense_variant	E/D	gaA/gaT	MODERATE	SNV
ASPM	chr1	197090233.0	Silent	p.=	ENST00000367409	synonymous_variant	K	aaG/aaA	LOW	SNV
ASPM	chr1	197102046.0	Missense_Mutation	p.Arg2402Thr	ENST00000367409	missense_variant	R/T	aGa/aCa	MODERATE	SNV
ASPM	chr1	197084205.0	3'UTR		ENST00000367409	3_prime_UTR_variant			MODIFIER	deletion
ASPM	chr1	197101393.0	Frame_Shift_Ins	p.Gln2620ThrfsTer17	ENST00000367409	frameshift_variant	-/X	-/A	HIGH	insertion
ASPM	chr1	197102470.0	Frame_Shift_Del	p.Met2261Ter	ENST00000367409	frameshift_variant	M/X	Atg/tg	HIGH	deletion
ASPM	chr1	197142439.0	Frame_Shift_Del	p.Ser605LeufsTer16	ENST00000367409	frameshift_variant	S/X	Tct/ct	HIGH	deletion
ASPM	chr1	197104101.0	Frame_Shift_Ins	p.Ile1717AsnfsTer24	ENST00000367409	frameshift_variant	I/NX	ata/aAta	HIGH	insertion
ASPM	chr1	197122565.0	Missense_Mutation	p.Gly1141Ser	ENST00000367409	missense_variant	G/S	Ggc/Agc	MODERATE	SNV
ASPM	chr1	197125190.0	Nonsense_Mutation	p.Arg980Ter	ENST00000367409	stop_gained;splice_region_variant	R/*	Cga/Tga	HIGH	SNV
ASPM	chr1	197128497.0	Missense_Mutation	p.Arg977Cys	ENST00000367409	missense_variant	R/C	Cgc/Tgc	MODERATE	SNV
ASPM	chr1	197102886.0	Nonsense_Mutation	p.Phe2122delinsCysPheCysTyrPheLeuTerLeu	ENST00000367409	stop_gained;protein_altering_variant	F/CFCYFL*L	ttt/tGTTTTTGTTATTTTCTTTAACtt	HIGH	insertion
ASPM	chr1	197142892.0	Missense_Mutation	p.Leu454Ile	ENST00000367409	missense_variant	L/I	Cta/Ata	MODERATE	SNV
ASPM	chr1	197142679.0	Missense_Mutation	p.Val525Leu	ENST00000367409	missense_variant	V/L	Gtg/Ttg	MODERATE	SNV
ASPM	chr1	197104942.0	Missense_Mutation	p.Arg1437Cys	ENST00000367409	missense_variant	R/C	Cgt/Tgt	MODERATE	SNV
ASPM	chr1	197102455.0	Missense_Mutation	p.Ala2266Thr	ENST00000367409	missense_variant	A/T	Gca/Aca	MODERATE	SNV
ASPM	chr1	197104137.0	Missense_Mutation	p.Ala1705Val	ENST00000367409	missense_variant	A/V	gCa/gTa	MODERATE	SNV
ASPM	chr1	197125082.0	Missense_Mutation	p.Leu1016Val	ENST00000367409	missense_variant	L/V	Ctt/Gtt	MODERATE	SNV
ASPM	chr1	197124892.0	Nonsense_Mutation	p.Trp1049Ter	ENST00000367409	stop_gained	W/*	tGg/tAg	HIGH	SNV
ASPM	chr1	197125135.0	Missense_Mutation	p.Pro998Leu	ENST00000367409	missense_variant	P/L	cCg/cTg	MODERATE	SNV
ASPM	chr1	197086915.0	Missense_Mutation	p.Ala3407Thr	ENST00000367409	missense_variant	A/T	Gct/Act	MODERATE	SNV
ASPM	chr1	197086868.0	Silent	p.=	ENST00000367409	synonymous_variant	K	aaG/aaA	LOW	SNV
ASPM	chr1	197122473.0	Silent	p.=	ENST00000367409	synonymous_variant	C	tgT/tgC	LOW	SNV
ASPM	chr1	197104402.0	Nonsense_Mutation	p.Arg1617Ter	ENST00000367409	stop_gained	R/*	Cga/Tga	HIGH	SNV
ASPM	chr1	197142472.0	Missense_Mutation	p.Thr594Ala	ENST00000367409	missense_variant	T/A	Aca/Gca	MODERATE	SNV
ASPM	chr1	197117875.0	Nonsense_Mutation	p.Arg1327Ter	ENST00000367409	stop_gained	R/*	Cga/Tga	HIGH	SNV
ASPM	chr1	197101060.0	Missense_Mutation	p.Glu2731Lys	ENST00000367409	missense_variant	E/K	Gaa/Aaa	MODERATE	SNV
ASPM	chr1	197103177.0	Missense_Mutation	p.Val2025Ala	ENST00000367409	missense_variant	V/A	gTa/gCa	MODERATE	SNV
ASPM	chr1	197124311.0	Frame_Shift_Del	p.Asn1062ArgfsTer28	ENST00000367409	frameshift_variant	NL/X	aACTTA/a	HIGH	deletion
ASPM	chr1	197102712.0	Missense_Mutation	p.Val2180Glu	ENST00000367409	missense_variant	V/E	gTa/gAa	MODERATE	SNV
ASPM	chr1	197102871.0	Missense_Mutation	p.Phe2127Ser	ENST00000367409	missense_variant	F/S	tTt/tCt	MODERATE	SNV
ASPM	chr1	197117845.0	Missense_Mutation	p.Met1337Leu	ENST00000367409	missense_variant	M/L	Atg/Ctg	MODERATE	SNV
ASPM	chr1	197142428.0	Silent	p.=	ENST00000367409	synonymous_variant	E	gaG/gaA	LOW	SNV
ASPM	chr1	197143003.0	Missense_Mutation	p.Asn417Asp	ENST00000367409	missense_variant	N/D	Aat/Gat	MODERATE	SNV
ASPM	chr1	197101162.0	Missense_Mutation	p.Ser2697Pro	ENST00000367409	missense_variant	S/P	Tca/Cca	MODERATE	SNV
ASPM	chr1	197101807.0	Silent	p.=	ENST00000367409	synonymous_variant	R	Agg/Cgg	LOW	SNV
ASPM	chr1	197103085.0	Missense_Mutation	p.Ala2056Thr	ENST00000367409	missense_variant	A/T	Gct/Act	MODERATE	SNV
ASPM	chr1	197142356.0	Missense_Mutation	p.Glu632Asp	ENST00000367409	missense_variant	E/D	gaG/gaT	MODERATE	SNV
ASPM	chr1	197122160.0	Frame_Shift_Del	p.Lys1247ArgfsTer21	ENST00000367409	frameshift_variant;splice_region_variant	K/X	aAg/ag	HIGH	deletion
ASPM	chr1	197101206.0	Missense_Mutation	p.Arg2682Gln	ENST00000367409	missense_variant	R/Q	cGa/cAa	MODERATE	SNV
ASPM	chr1	197104519.0	Nonsense_Mutation	p.Arg1578Ter	ENST00000367409	stop_gained	R/*	Cga/Tga	HIGH	SNV
ASPM	chr1	197103287.0	Silent	p.=	ENST00000367409	synonymous_variant	K	aaG/aaA	LOW	SNV
ASPM	chr1	197101393.0	Frame_Shift_Ins	p.Gln2620AsnfsTer22	ENST00000367409	frameshift_variant	-/X	-/AA	HIGH	insertion
ASPM	chr1	197086957.0	Missense_Mutation	p.Ser3393Pro	ENST00000367409	missense_variant	S/P	Tcc/Ccc	MODERATE	SNV
ASPM	chr1	197088230.0	Intron		ENST00000367409	intron_variant			MODIFIER	SNV
ASPM	chr1	197102933.0	Silent	p.=	ENST00000367409	synonymous_variant	G	ggT/ggC	LOW	SNV
ASPM	chr1	197104596.0	Missense_Mutation	p.Lys1552Ile	ENST00000367409	missense_variant	K/I	aAa/aTa	MODERATE	SNV
ASPM	chr1	197100629.0	Missense_Mutation	p.Gln2874His	ENST00000367409	missense_variant	Q/H	caA/caC	MODERATE	SNV
ASPM	chr1	197101993.0	Missense_Mutation	p.Ser2420Pro	ENST00000367409	missense_variant	S/P	Tca/Cca	MODERATE	SNV
ASPM	chr1	197102839.0	Missense_Mutation	p.Thr2138Ala	ENST00000367409	missense_variant	T/A	Aca/Gca	MODERATE	SNV
ASPM	chr1	197104851.0	Missense_Mutation	p.Ser1467Phe	ENST00000367409	missense_variant	S/F	tCt/tTt	MODERATE	SNV
ASPM	chr1	197146229.0	Missense_Mutation	p.Pro70His	ENST00000367409	missense_variant	P/H	cCt/cAt	MODERATE	SNV
ASPM	chr1	197103623.0	Frame_Shift_Del	p.Ala1877LeufsTer2	ENST00000367409	frameshift_variant	A/X	gcA/gc	HIGH	deletion
ASPM	chr1	197100872.0	Missense_Mutation	p.Met2793Ile	ENST00000367409	missense_variant	M/I	atG/atA	MODERATE	SNV
ASPM	chr1	197143062.0	Frame_Shift_Del	p.Leu397Ter	ENST00000367409	frameshift_variant	L/X	tTa/ta	HIGH	deletion
SOX9	chr17	72123769.0	Frame_Shift_Del	p.Val306CysfsTer77	ENST00000245479	frameshift_variant	P/X	ccG/cc	HIGH	deletion
SOX9	chr17	72121483.0	Missense_Mutation	p.Ala31Val	ENST00000245479	missense_variant	A/V	gCg/gTg	MODERATE	SNV
SOX9	chr17	72124037.0	Nonsense_Mutation	p.Arg394Ter	ENST00000245479	stop_gained	R/*	Cga/Tga	HIGH	SNV
SOX9	chr17	72124040.0	Frame_Shift_Ins	p.His396ArgfsTer8	ENST00000245479	frameshift_variant	T/TX	acg/aCGcg	HIGH	insertion
SOX9	chr17	72123564.0	Frame_Shift_Del	p.Pro237ThrfsTer14	ENST00000245479	frameshift_variant	T/X	aCC/a	HIGH	deletion
SOX9	chr17	72123553.0	Frame_Shift_Del	p.Gly233AlafsTer20	ENST00000245479	frameshift_variant	Q/X	caG/ca	HIGH	deletion
SOX9	chr17	72123593.0	Nonsense_Mutation	p.Gln246Ter	ENST00000245479	stop_gained	Q/*	Cag/Tag	HIGH	SNV
SOX9	chr17	72122740.0	In_Frame_Del	p.Arg152del	ENST00000245479	inframe_deletion	KR/K	aaGCGg/aag	MODERATE	deletion
SOX9	chr17	72123621.0	Frame_Shift_Ins	p.Pro258GlyfsTer23	ENST00000245479	frameshift_variant	E/EGX	gag/gaGGGGCg	HIGH	insertion
SOX9	chr17	72123621.0	Frame_Shift_Ins	p.Arg257AlafsTer39	ENST00000245479	frameshift_variant	E/EX	gag/gaGg	HIGH	insertion
SOX9	chr17	72121752.0	Missense_Mutation	p.Arg121Gly	ENST00000245479	missense_variant	R/G	Agg/Ggg	MODERATE	SNV
SOX9	chr17	72124338.0	Frame_Shift_Ins	p.Gln496ProfsTer82	ENST00000245479	frameshift_variant	S/SX	agc/agCc	HIGH	insertion
SOX9	chr17	72123729.0	Frame_Shift_Del	p.Val291AlafsTer92	ENST00000245479	frameshift_variant	V/X	gTc/gc	HIGH	deletion
SOX9	chr17	72121472.0	Silent	p.=	ENST00000245479	synonymous_variant	S	tcC/tcT	LOW	SNV
SOX9	chr17	72122790.0	Missense_Mutation	p.Asp168Gly	ENST00000245479	missense_variant	D/G	gAc/gGc	MODERATE	SNV
SOX9	chr17	72123576.0	Frame_Shift_Del	p.Thr243ProfsTer10	ENST00000245479	frameshift_variant	T/X	aCc/ac	HIGH	deletion
SOX9	chr17	72123779.0	Missense_Mutation	p.Ala308Ser	ENST00000245479	missense_variant	A/S	Gcc/Tcc	MODERATE	SNV
SOX9	chr17	72124100.0	Frame_Shift_Del	p.Gln416AsnfsTer54	ENST00000245479	frameshift_variant	P/X	Ccc/cc	HIGH	deletion
SOX9	chr17	72122778.0	Missense_Mutation	p.Gln164Pro	ENST00000245479	missense_variant	Q/P	cAg/cCg	MODERATE	SNV
SOX9	chr17	72124200.0	Frame_Shift_Del	p.Ser448Ter	ENST00000245479	frameshift_variant	S/X	tCC/t	HIGH	deletion
SOX9	chr17	72123639.0	Frame_Shift_Ins	p.Arg264GlnfsTer32	ENST00000245479	frameshift_variant	E/EX	gag/gaGg	HIGH	insertion
SOX9	chr17	72124021.0	Frame_Shift_Ins	p.Gly390ArgfsTer14	ENST00000245479	frameshift_variant	-/X	-/CC	HIGH	insertion
SOX9	chr17	72122724.0	Frame_Shift_Del	p.Leu146ArgfsTer37	ENST00000245479	frameshift_variant	L/X	cTg/cg	HIGH	deletion
SOX9	chr17	72123728.0	Frame_Shift_Ins	p.Glu293GlnfsTer4	ENST00000245479	frameshift_variant	V/VNX	gtc/gTCAAtc	HIGH	insertion
SOX9	chr17	72122813.0	Missense_Mutation	p.Pro176Ser	ENST00000245479	missense_variant	P/S	Ccg/Tcg	MODERATE	SNV
SOX9	chr17	72124058.0	Nonsense_Mutation	p.Gln401Ter	ENST00000245479	stop_gained	Q/*	Cag/Tag	HIGH	SNV
SOX9	chr17	72123617.0	Frame_Shift_Ins	p.Gly256ArgfsTer24	ENST00000245479	frameshift_variant	R/RX	cga/cGAga	HIGH	insertion
SOX9	chr17	72124116.0	Missense_Mutation	p.Tyr420Cys	ENST00000245479	missense_variant	Y/C	tAc/tGc	MODERATE	SNV
SOX9	chr17	72121720.0	Missense_Mutation	p.Asn110Ser	ENST00000245479	missense_variant	N/S	aAc/aGc	MODERATE	SNV
SOX9	chr17	72123618.0	Frame_Shift_Del	p.Glu255GlyfsTer40	ENST00000245479	frameshift_variant	R/X	cGA/c	HIGH	deletion
SOX9	chr17	72124012.0	Frame_Shift_Del	p.Glu388Ter	ENST00000245479	frameshift_variant	LSSEPGQSQRTHIKT/X	ctGAGCAGCGAGCCGGGCCAGTCCCAGCGAACGCACATCAAGACG/ct	HIGH	deletion
SOX9	chr17	72124265.0	Missense_Mutation	p.Asn470Asp	ENST00000245479	missense_variant	N/D	Aac/Gac	MODERATE	SNV
SOX9	chr17	72124094.0	Frame_Shift_Ins	p.His413LeufsTer58	ENST00000245479	frameshift_variant	H/LX	cac/cTGac	HIGH	insertion
SOX9	chr17	72124096.0	In_Frame_Del	p.His413_Ser414delinsGln	ENST00000245479	inframe_deletion	HS/Q	caCTCg/cag	MODERATE	deletion
SOX9	chr17	72123772.0	Frame_Shift_Ins	p.Pro307CysfsTer77	ENST00000245479	frameshift_variant	-/X	-/GT	HIGH	insertion
SOX9	chr17	72121811.0	Silent	p.=	ENST00000245479	synonymous_variant	G	ggC/ggT	LOW	SNV
SOX9	chr17	72123741.0	Nonsense_Mutation	p.Asp295GlufsTer10	ENST00000245479	stop_gained;frameshift_variant	D/EEECGSLPY*NQISKX	gac/gaGGAGGAGTGTGGCAGTTTGCCATATTAAAACCAGATAAGCAAGTc	HIGH	insertion
SOX9	chr17	72122801.0	Missense_Mutation	p.Tyr172His	ENST00000245479	missense_variant	Y/H	Tac/Cac	MODERATE	SNV
SOX9	chr17	72122811.0	Missense_Mutation	p.Gln175Pro	ENST00000245479	missense_variant	Q/P	cAg/cCg	MODERATE	SNV
SOX9	chr17	72124053.0	Frame_Shift_Ins	p.Glu400GlyfsTer178	ENST00000245479	frameshift_variant	T/TX	acg/acGg	HIGH	insertion
SOX9	chr17	72124073.0	Frame_Shift_Ins	p.His406GlnfsTer172	ENST00000245479	frameshift_variant	H/QX	cac/cAac	HIGH	insertion
SOX9	chr17	72123723.0	Frame_Shift_Ins	p.Asp290ArgfsTer6	ENST00000245479	frameshift_variant	F/FX	ttc/ttCc	HIGH	insertion
SOX9	chr17	72123667.0	Missense_Mutation	p.Phe270Leu	ENST00000245479	missense_variant	F/L	ttC/ttA	MODERATE	SNV
SOX9	chr17	72121459.0	Frame_Shift_Ins	p.Thr25ProfsTer37	ENST00000245479	frameshift_variant	S/SX	agc/agCCc	HIGH	insertion
SOX9	chr17	72124072.0	Frame_Shift_Ins	p.Ser408ThrfsTer64	ENST00000245479	frameshift_variant	-/HX	-/CACTA	HIGH	insertion
SOX9	chr17	72124157.0	Frame_Shift_Del	p.Ile435SerfsTer35	ENST00000245479	frameshift_variant	P/X	Ccc/cc	HIGH	deletion
SOX9	chr17	72122971.0	Frame_Shift_Del		ENST00000245479	frameshift_variant;splice_region_variant	S/X	tcG/tc	HIGH	deletion
SOX9	chr17	72123990.0	Frame_Shift_Ins	p.Ala379GlyfsTer5	ENST00000245479	frameshift_variant	Q/QX	cag/caGGg	HIGH	insertion
SOX9	chr17	72121620.0	Missense_Mutation	p.Val77Phe	ENST00000245479	missense_variant	V/F	Gtc/Ttc	MODERATE	SNV
SOX9	chr17	72121569.0	Frame_Shift_Ins	p.Lys61GlufsTer191	ENST00000245479	frameshift_variant	L/LX	ctg/cTtg	HIGH	insertion
SOX9	chr17	72121812.0	Missense_Mutation	p.Lys141Glu	ENST00000245479	missense_variant	K/E	Aag/Gag	MODERATE	SNV
SOX9	chr17	72123621.0	Frame_Shift_Ins	p.Arg257GlyfsTer23	ENST00000245479	frameshift_variant	E/EX	gag/gaGGg	HIGH	insertion
SOX9	chr17	72124287.0	Frame_Shift_Ins	p.Thr478HisfsTer100	ENST00000245479	frameshift_variant	Y/YX	tac/taCc	HIGH	insertion
SOX9	chr17	72123673.0	Frame_Shift_Ins	p.Asp274TrpfsTer6	ENST00000245479	frameshift_variant	-/X	-/GT	HIGH	insertion
SOX9	chr17	72122799.0	Frame_Shift_Ins	p.Tyr172LeufsTer80	ENST00000245479	frameshift_variant	D/DX	gat/gaTt	HIGH	insertion
SOX9	chr17	72121672.0	Missense_Mutation	p.Arg94His	ENST00000245479	missense_variant	R/H	cGc/cAc	MODERATE	SNV
SOX9	chr17	72121574.0	Frame_Shift_Ins	p.Glu63GlyfsTer189	ENST00000245479	frameshift_variant	-/X	-/A	HIGH	insertion
SOX9	chr17	72122706.0	Splice_Site		ENST00000245479	splice_acceptor_variant;coding_sequence_variant;intron_variant			HIGH	deletion
SOX9	chr17	72123542.0	Splice_Site		ENST00000245479	splice_acceptor_variant			HIGH	SNV
SOX9	chr17	72124124.0	Frame_Shift_Del	p.Phe423SerfsTer47	ENST00000245479	frameshift_variant	F/X	Ttc/tc	HIGH	deletion
SOX9	chr17	72124173.0	Frame_Shift_Ins	p.Tyr440ValfsTer138	ENST00000245479	frameshift_variant	Q/QX	cag/caGg	HIGH	insertion
SOX9	chr17	72124177.0	Frame_Shift_Ins	p.Asp441GlyfsTer137	ENST00000245479	frameshift_variant	-/X	-/G	HIGH	insertion
SOX9	chr17	72122909.0	Nonsense_Mutation	p.Gln208Ter	ENST00000245479	stop_gained	Q/*	Cag/Tag	HIGH	SNV
SOX9	chr17	72121794.0	Missense_Mutation	p.Leu135Phe	ENST00000245479	missense_variant	L/F	Ctc/Ttc	MODERATE	SNV
SOX9	chr17	72124204.0	Frame_Shift_Ins	p.Tyr451PhefsTer128	ENST00000245479	frameshift_variant	-/SX	-/TCCT	HIGH	insertion
SOX9	chr17	72123545.0	Nonsense_Mutation	p.Gln230Ter	ENST00000245479	stop_gained;splice_region_variant	Q/*	Caa/Taa	HIGH	SNV
SOX9	chr17	72123768.0	Frame_Shift_Ins	p.Val306GlyfsTer272	ENST00000245479	frameshift_variant	P/PX	ccg/ccGg	HIGH	insertion
SOX9	chr17	72121749.0	Missense_Mutation	p.Arg120Cys	ENST00000245479	missense_variant	R/C	Cgc/Tgc	MODERATE	SNV
SOX9	chr17	72123974.0	Frame_Shift_Del	p.Pro374ArgfsTer9	ENST00000245479	frameshift_variant	P/X	Ccc/cc	HIGH	deletion
SOX9	chr17	72122729.0	Nonsense_Mutation	p.Glu148Ter	ENST00000245479	stop_gained	E/*	Gag/Tag	HIGH	SNV
RP1	chr8	54621469.0	Missense_Mutation	p.Arg168His	ENST00000220676	missense_variant	R/H	cGt/cAt	MODERATE	SNV
RP1	chr8	54622164.0	Silent	p.=	ENST00000220676	synonymous_variant	A	gcG/gcA	LOW	SNV
RP1	chr8	54626393.0	Silent	p.=	ENST00000220676	synonymous_variant	Q	caA/caG	LOW	SNV
RP1	chr8	54626104.0	Missense_Mutation	p.Asn741Thr	ENST00000220676	missense_variant	N/T	aAt/aCt	MODERATE	SNV
RP1	chr8	54629614.0	Missense_Mutation	p.Tyr1911Cys	ENST00000220676	missense_variant	Y/C	tAt/tGt	MODERATE	SNV
RP1	chr8	54628700.0	Silent	p.=	ENST00000220676	synonymous_variant	T	acA/acT	LOW	SNV
RP1	chr8	54627214.0	Nonsense_Mutation	p.Ser1111Ter	ENST00000220676	stop_gained	S/*	tCa/tAa	HIGH	SNV
RP1	chr8	54625100.0	Missense_Mutation	p.Glu406Asp	ENST00000220676	missense_variant	E/D	gaG/gaT	MODERATE	SNV
RP1	chr8	54625741.0	Missense_Mutation	p.Ser620Tyr	ENST00000220676	missense_variant	S/Y	tCt/tAt	MODERATE	SNV
RP1	chr8	54629130.0	Nonsense_Mutation	p.Glu1750Ter	ENST00000220676	stop_gained	E/*	Gaa/Taa	HIGH	SNV
RP1	chr8	54629950.0	Missense_Mutation	p.Lys2023Thr	ENST00000220676	missense_variant	K/T	aAa/aCa	MODERATE	SNV
RP1	chr8	54630342.0	Missense_Mutation	p.Glu2154Lys	ENST00000220676	missense_variant	E/K	Gaa/Aaa	MODERATE	SNV
RP1	chr8	54627719.0	Frame_Shift_Del	p.Pro1282LeufsTer12	ENST00000220676	frameshift_variant	T/X	acT/ac	HIGH	deletion
RP1	chr8	54621110.0	Silent	p.=	ENST00000220676	synonymous_variant	F	ttC/ttT	LOW	SNV
RP1	chr8	54625550.0	Missense_Mutation	p.Lys556Asn	ENST00000220676	missense_variant	K/N	aaG/aaT	MODERATE	SNV
RP1	chr8	54624851.0	Silent	p.=	ENST00000220676	synonymous_variant	I	atT/atA	LOW	SNV
RP1	chr8	54622131.0	Missense_Mutation	p.Gln210His	ENST00000220676	missense_variant	Q/H	caG/caT	MODERATE	SNV
RP1	chr8	54622248.0	Silent	p.=	ENST00000220676	synonymous_variant	R	cgT/cgC	LOW	SNV
RP1	chr8	54628724.0	Silent	p.=	ENST00000220676	synonymous_variant	S	agT/agC	LOW	SNV
RP1	chr8	54630280.0	Missense_Mutation	p.Leu2133Arg	ENST00000220676	missense_variant	L/R	cTt/cGt	MODERATE	SNV
RP1	chr8	54621010.0	Missense_Mutation	p.Thr15Met	ENST00000220676	missense_variant	T/M	aCg/aTg	MODERATE	SNV
RP1	chr8	54625124.0	Silent	p.=	ENST00000220676	synonymous_variant	D	gaT/gaC	LOW	SNV
RP1	chr8	54626032.0	Missense_Mutation	p.Ser717Leu	ENST00000220676	missense_variant	S/L	tCa/tTa	MODERATE	SNV
RP1	chr8	54621246.0	Missense_Mutation	p.Arg94Cys	ENST00000220676	missense_variant	R/C	Cgc/Tgc	MODERATE	SNV
RP1	chr8	54625226.0	Frame_Shift_Ins	p.Thr451TyrfsTer22	ENST00000220676	frameshift_variant	-/X	-/C	HIGH	insertion
RP1	chr8	54626253.0	Frame_Shift_Del	p.Arg793GlufsTer55	ENST00000220676	frameshift_variant	K/X	Aaa/aa	HIGH	deletion
RP1	chr8	54628299.0	Missense_Mutation	p.Asn1473Tyr	ENST00000220676	missense_variant	N/Y	Aac/Tac	MODERATE	SNV
RP1	chr8	54629369.0	Frame_Shift_Del	p.His1831MetfsTer17	ENST00000220676	frameshift_variant	P/X	ccT/cc	HIGH	deletion
RP1	chr8	54628619.0	Frame_Shift_Del	p.Lys1581AsnfsTer7	ENST00000220676	frameshift_variant	L/X	ttA/tt	HIGH	deletion
RP1	chr8	54621166.0	Missense_Mutation	p.Leu67Pro	ENST00000220676	missense_variant	L/P	cTg/cCg	MODERATE	SNV
RP1	chr8	54626471.0	Silent	p.=	ENST00000220676	synonymous_variant	H	caC/caT	LOW	SNV
RP1	chr8	54621390.0	Missense_Mutation	p.Val142Ile	ENST00000220676	missense_variant	V/I	Gta/Ata	MODERATE	SNV
RP1	chr8	54628210.0	Missense_Mutation	p.Arg1443Gln	ENST00000220676	missense_variant	R/Q	cGg/cAg	MODERATE	SNV
RP1	chr8	54629481.0	Missense_Mutation	p.Val1867Ile	ENST00000220676	missense_variant	V/I	Gtc/Atc	MODERATE	SNV
RP1	chr8	54621419.0	Frame_Shift_Del	p.Pro153HisfsTer4	ENST00000220676	frameshift_variant	R/X	cgC/cg	HIGH	deletion
RP1	chr8	54630043.0	Missense_Mutation	p.Leu2054Pro	ENST00000220676	missense_variant	L/P	cTc/cCc	MODERATE	SNV
RP1	chr8	54622169.0	Missense_Mutation	p.Gly223Val	ENST00000220676	missense_variant	G/V	gGa/gTa	MODERATE	SNV
RP1	chr8	54624866.0	Silent	p.=	ENST00000220676	synonymous_variant	D	gaC/gaT	LOW	SNV
RP1	chr8	54625724.0	Frame_Shift_Del	p.Ser616GlnfsTer30	ENST00000220676	frameshift_variant	H/X	caT/ca	HIGH	deletion
RP1	chr8	54628817.0	Frame_Shift_Del	p.Pro1648LeufsTer62	ENST00000220676	frameshift_variant	S/X	tcT/tc	HIGH	deletion
RP1	chr8	54621577.0	Missense_Mutation	p.Arg204Met	ENST00000220676	missense_variant	R/M	aGg/aTg	MODERATE	SNV
RP1	chr8	54628035.0	Missense_Mutation	p.Asn1385His	ENST00000220676	missense_variant	N/H	Aat/Cat	MODERATE	SNV
RP1	chr8	54621569.0	Silent	p.=	ENST00000220676	synonymous_variant	T	acG/acA	LOW	SNV
RP1	chr8	54621397.0	Missense_Mutation	p.Val144Ala	ENST00000220676	missense_variant	V/A	gTc/gCc	MODERATE	SNV
RP1	chr8	54629152.0	Missense_Mutation	p.Ser1757Leu	ENST00000220676	missense_variant	S/L	tCa/tTa	MODERATE	SNV
RP1	chr8	54628023.0	Missense_Mutation	p.Lys1381Glu	ENST00000220676	missense_variant	K/E	Aaa/Gaa	MODERATE	SNV
RP1	chr8	54622205.0	Frame_Shift_Del	p.Lys236AsnfsTer28	ENST00000220676	frameshift_variant	Q/X	cAa/ca	HIGH	deletion
RP1	chr8	54626158.0	Missense_Mutation	p.Arg759Ile	ENST00000220676	missense_variant	R/I	aGa/aTa	MODERATE	SNV
RP1	chr8	54628587.0	Missense_Mutation	p.Thr1569Pro	ENST00000220676	missense_variant	T/P	Act/Cct	MODERATE	SNV
RP1	chr8	54629277.0	Nonsense_Mutation	p.Glu1799Ter	ENST00000220676	stop_gained	E/*	Gaa/Taa	HIGH	SNV
RP1	chr8	54630345.0	Missense_Mutation	p.Asp2155Tyr	ENST00000220676	missense_variant	D/Y	Gat/Tat	MODERATE	SNV
RP1	chr8	54621225.0	Missense_Mutation	p.Arg87Trp	ENST00000220676	missense_variant	R/W	Cgg/Tgg	MODERATE	SNV
RP1	chr8	54629570.0	Missense_Mutation	p.Met1896Ile	ENST00000220676	missense_variant	M/I	atG/atA	MODERATE	SNV
RP1	chr8	54621076.0	Missense_Mutation	p.Arg37Gln	ENST00000220676	missense_variant	R/Q	cGa/cAa	MODERATE	SNV
RP1	chr8	54628179.0	Missense_Mutation	p.Ala1433Thr	ENST00000220676	missense_variant	A/T	Gca/Aca	MODERATE	SNV
RP1	chr8	54629782.0	Missense_Mutation	p.Phe1967Ser	ENST00000220676	missense_variant	F/S	tTc/tCc	MODERATE	SNV
RP1	chr8	54629028.0	Missense_Mutation	p.Gly1716Ser	ENST00000220676	missense_variant	G/S	Ggt/Agt	MODERATE	SNV
RP1	chr8	54629679.0	Nonsense_Mutation	p.Arg1933Ter	ENST00000220676	stop_gained	R/*	Cga/Tga	HIGH	SNV
RP1	chr8	54621516.0	Missense_Mutation	p.Leu184Ile	ENST00000220676	missense_variant	L/I	Cta/Ata	MODERATE	SNV
RP1	chr8	54625916.0	Silent	p.=	ENST00000220676	synonymous_variant	Q	caG/caA	LOW	SNV
RP1	chr8	54628056.0	Missense_Mutation	p.Asn1392Asp	ENST00000220676	missense_variant	N/D	Aat/Gat	MODERATE	SNV
RP1	chr8	54630039.0	Missense_Mutation	p.Asp2053His	ENST00000220676	missense_variant	D/H	Gac/Cac	MODERATE	SNV
RP1	chr8	54621113.0	Silent	p.=	ENST00000220676	synonymous_variant	G	ggC/ggT	LOW	SNV
RP1	chr8	54627825.0	Frame_Shift_Ins	p.Cys1315TyrfsTer12	ENST00000220676	frameshift_variant	C/YLQX	tgt/tATTTACAgt	HIGH	insertion
RP1	chr8	54628358.0	Frame_Shift_Ins	p.Leu1493ValfsTer4	ENST00000220676	frameshift_variant	-/VRX	-/GTCCGTGG	HIGH	insertion
RP1	chr8	54625228.0	Missense_Mutation	p.Pro449His	ENST00000220676	missense_variant	P/H	cCc/cAc	MODERATE	SNV
RP1	chr8	54628227.0	Missense_Mutation	p.Gly1449Cys	ENST00000220676	missense_variant	G/C	Ggc/Tgc	MODERATE	SNV
RP1	chr8	54628228.0	Missense_Mutation	p.Gly1449Val	ENST00000220676	missense_variant	G/V	gGc/gTc	MODERATE	SNV
RP1	chr8	54621418.0	Missense_Mutation	p.Arg151His	ENST00000220676	missense_variant	R/H	cGc/cAc	MODERATE	SNV
RP1	chr8	54626576.0	Frame_Shift_Ins	p.Pro901ThrfsTer2	ENST00000220676	frameshift_variant	-/X	-/A	HIGH	insertion
COL11A1	chr1	102898154.0	Missense_Mutation	p.Ala1425Thr	ENST00000370096	missense_variant	A/T	Gca/Aca	MODERATE	SNV
COL11A1	chr1	102881713.0	Missense_Mutation	p.Phe1675Cys	ENST00000370096	missense_variant	F/C	tTt/tGt	MODERATE	SNV
COL11A1	chr1	103018849.0	Missense_Mutation	p.Val440Gly	ENST00000370096	missense_variant	V/G	gTc/gGc	MODERATE	SNV
COL11A1	chr1	103025531.0	Missense_Mutation	p.Gly327Glu	ENST00000370096	missense_variant	G/E	gGg/gAg	MODERATE	SNV
COL11A1	chr1	103026214.0	Splice_Site		ENST00000370096	splice_donor_variant			HIGH	SNV
COL11A1	chr1	103108224.0	5'UTR		ENST00000370096	5_prime_UTR_variant			MODIFIER	SNV
COL11A1	chr1	103002768.0	Silent	p.=	ENST00000370096	synonymous_variant	P	ccC/ccA	LOW	SNV
COL11A1	chr1	102881763.0	Splice_Region	p.=	ENST00000370096	splice_region_variant;synonymous_variant	V	gtA/gtG	LOW	SNV
COL11A1	chr1	103006303.0	Missense_Mutation	p.Val566Ile	ENST00000370096	missense_variant	V/I	Gtc/Atc	MODERATE	SNV
COL11A1	chr1	102940424.0	Frame_Shift_Del	p.Gly1096ValfsTer102	ENST00000370096	frameshift_variant	G/X	gGt/gt	HIGH	deletion
COL11A1	chr1	103078802.0	Missense_Mutation	p.Leu115His	ENST00000370096	missense_variant	L/H	cTt/cAt	MODERATE	SNV
COL11A1	chr1	103108241.0	5'UTR		ENST00000370096	5_prime_UTR_variant			MODIFIER	SNV
COL11A1	chr1	102978738.0	Silent	p.=	ENST00000370096	synonymous_variant	G	ggC/ggT	LOW	SNV
COL11A1	chr1	102879904.0	Missense_Mutation	p.Asp1685Tyr	ENST00000370096	missense_variant	D/Y	Gat/Tat	MODERATE	SNV
COL11A1	chr1	102946899.0	Missense_Mutation	p.Arg1076Cys	ENST00000370096	missense_variant	R/C	Cgc/Tgc	MODERATE	SNV
COL11A1	chr1	103015740.0	Splice_Region	p.=	ENST00000370096	splice_region_variant;synonymous_variant	G	ggC/ggT	LOW	SNV
COL11A1	chr1	103074717.0	Missense_Mutation	p.Lys184Asn	ENST00000370096	missense_variant	K/N	aaG/aaT	MODERATE	SNV
COL11A1	chr1	103022849.0	Missense_Mutation	p.Glu380Lys	ENST00000370096	missense_variant	E/K	Gaa/Aaa	MODERATE	SNV
COL11A1	chr1	102879751.0	Nonsense_Mutation	p.Gly1736Ter	ENST00000370096	stop_gained	G/*	Gga/Tga	HIGH	SNV
COL11A1	chr1	102887005.0	Frame_Shift_Del	p.Thr1554ArgfsTer33	ENST00000370096	frameshift_variant	T/X	Acg/cg	HIGH	deletion
COL11A1	chr1	102995865.0	Frame_Shift_Del	p.Lys780ArgfsTer15	ENST00000370096	frameshift_variant;splice_region_variant	K/X	aAg/ag	HIGH	deletion
COL11A1	chr1	103108302.0	5'UTR		ENST00000370096	5_prime_UTR_variant			MODIFIER	SNV
COL11A1	chr1	102978732.0	Silent	p.=	ENST00000370096	synonymous_variant	G	ggC/ggT	LOW	SNV
COL11A1	chr1	102879831.0	Frame_Shift_Del	p.Asn1709IlefsTer76	ENST00000370096	frameshift_variant	N/X	aAt/at	HIGH	deletion
COL11A1	chr1	103008510.0	Frame_Shift_Ins	p.Pro546AlafsTer9	ENST00000370096	frameshift_variant	-/X	-/G	HIGH	insertion
COL11A1	chr1	102879804.0	Missense_Mutation	p.Ala1718Val	ENST00000370096	missense_variant	A/V	gCa/gTa	MODERATE	SNV
COL11A1	chr1	103008510.0	Missense_Mutation	p.Pro546Ala	ENST00000370096	missense_variant	P/A	Cct/Gct	MODERATE	SNV
COL11A1	chr1	102879876.0	Missense_Mutation	p.Val1694Ala	ENST00000370096	missense_variant	V/A	gTg/gCg	MODERATE	SNV
COL11A1	chr1	103025872.0	Intron		ENST00000370096	intron_variant			MODIFIER	deletion
COL11A1	chr1	102915670.0	Missense_Mutation	p.Glu1259Asp	ENST00000370096	missense_variant	E/D	gaA/gaC	MODERATE	SNV
COL11A1	chr1	103022945.0	Missense_Mutation	p.Tyr348Asp	ENST00000370096	missense_variant	Y/D	Tat/Gat	MODERATE	SNV
COL11A1	chr1	102877901.0	3'UTR		ENST00000370096	3_prime_UTR_variant			MODIFIER	SNV
COL11A1	chr1	103005876.0	Missense_Mutation	p.Asp603Asn	ENST00000370096	missense_variant	D/N	Gat/Aat	MODERATE	SNV
COL11A1	chr1	102912212.0	Missense_Mutation	p.Gly1345Cys	ENST00000370096	missense_variant;splice_region_variant	G/C	Ggt/Tgt	MODERATE	SNV
COL11A1	chr1	102886888.0	Missense_Mutation	p.Met1593Leu	ENST00000370096	missense_variant	M/L	Atg/Ctg	MODERATE	SNV
COL11A1	chr1	102939059.0	Silent	p.=	ENST00000370096	synonymous_variant	G	ggC/ggT	LOW	SNV
COL11A1	chr1	102946912.0	Missense_Mutation	p.Ile1071Met	ENST00000370096	missense_variant	I/M	atT/atG	MODERATE	SNV
COL11A1	chr1	103004659.0	Splice_Region	p.=	ENST00000370096	splice_region_variant;synonymous_variant	G	ggT/ggC	LOW	SNV
COL11A1	chr1	103025943.0	Intron		ENST00000370096	intron_variant			MODIFIER	SNV
COL11A1	chr1	102886993.0	Missense_Mutation	p.Thr1558Pro	ENST00000370096	missense_variant	T/P	Act/Cct	MODERATE	SNV
COL11A1	chr1	102946850.0	Missense_Mutation	p.Pro1092Leu	ENST00000370096	missense_variant;splice_region_variant	P/L	cCt/cTt	MODERATE	SNV
COL11A1	chr1	103022889.0	Silent	p.=	ENST00000370096	synonymous_variant	D	gaC/gaT	LOW	SNV
COL11A1	chr1	102996000.0	Missense_Mutation	p.Arg762Trp	ENST00000370096	missense_variant	R/W	Cgg/Tgg	MODERATE	SNV
COL11A1	chr1	103026301.0	Missense_Mutation	p.Tyr271Ser	ENST00000370096	missense_variant	Y/S	tAt/tCt	MODERATE	SNV
COL11A1	chr1	103018847.0	Missense_Mutation	p.Glu441Lys	ENST00000370096	missense_variant	E/K	Gaa/Aaa	MODERATE	SNV
COL11A1	chr1	103018829.0	Missense_Mutation	p.Ala447Thr	ENST00000370096	missense_variant	A/T	Gca/Aca	MODERATE	SNV
COL11A1	chr1	102914384.0	Missense_Mutation	p.Asp1316His	ENST00000370096	missense_variant	D/H	Gat/Cat	MODERATE	SNV
COL11A1	chr1	103022981.0	Nonsense_Mutation	p.Glu336Ter	ENST00000370096	stop_gained	E/*	Gaa/Taa	HIGH	SNV
COL11A1	chr1	102879702.0	Missense_Mutation	p.Thr1752Lys	ENST00000370096	missense_variant	T/K	aCa/aAa	MODERATE	SNV
COL11A1	chr1	103006082.0	Nonsense_Mutation	p.Glu593Ter	ENST00000370096	stop_gained	E/*	Gaa/Taa	HIGH	SNV
COL11A1	chr1	103025855.0	Intron		ENST00000370096	intron_variant			MODIFIER	SNV
COL11A1	chr1	102888628.0	Splice_Region	p.=	ENST00000370096	splice_region_variant;synonymous_variant	G	ggA/ggG	LOW	SNV
COL11A1	chr1	102921546.0	Missense_Mutation	p.Arg1227Ile	ENST00000370096	missense_variant	R/I	aGa/aTa	MODERATE	SNV
COL11A1	chr1	103004461.0	Missense_Mutation	p.Gly643Ser	ENST00000370096	missense_variant	G/S	Ggt/Agt	MODERATE	SNV
COL11A1	chr1	102987707.0	Missense_Mutation	p.Asp810Tyr	ENST00000370096	missense_variant	D/Y	Gat/Tat	MODERATE	SNV
COL11A1	chr1	103014543.0	Missense_Mutation	p.Ala514Thr	ENST00000370096	missense_variant	A/T	Gct/Act	MODERATE	SNV
COL11A1	chr1	102881739.0	Missense_Mutation	p.Glu1666Asp	ENST00000370096	missense_variant	E/D	gaG/gaT	MODERATE	SNV
COL11A1	chr1	103031138.0	Missense_Mutation	p.Ala253Val	ENST00000370096	missense_variant	A/V	gCt/gTt	MODERATE	SNV
COL11A1	chr1	103025858.0	Intron		ENST00000370096	intron_variant			MODIFIER	SNV
COL11A1	chr1	102940435.0	Splice_Site		ENST00000370096	splice_acceptor_variant			HIGH	SNV
COL11A1	chr1	102879829.0	Missense_Mutation	p.Phe1710Val	ENST00000370096	missense_variant	F/V	Ttc/Gtc	MODERATE	SNV
COL11A1	chr1	103014591.0	Missense_Mutation	p.Arg498Cys	ENST00000370096	missense_variant	R/C	Cgt/Tgt	MODERATE	SNV
COL11A1	chr1	103022850.0	Silent	p.=	ENST00000370096	synonymous_variant	G	ggC/ggT	LOW	SNV
COL11A1	chr1	103008511.0	Frame_Shift_Del	p.Pro546LeufsTer87	ENST00000370096	frameshift_variant	G/X	ggG/gg	HIGH	deletion
COL11A1	chr1	103012424.0	Missense_Mutation	p.Pro540Ser	ENST00000370096	missense_variant	P/S	Cca/Tca	MODERATE	SNV
COL11A1	chr1	102888735.0	Silent	p.=	ENST00000370096	synonymous_variant	N	aaC/aaT	LOW	SNV
COL11A1	chr1	103108112.0	Missense_Mutation	p.Ala23Thr	ENST00000370096	missense_variant	A/T	Gca/Aca	MODERATE	SNV
COL11A1	chr1	103025534.0	Missense_Mutation	p.Ser326Phe	ENST00000370096	missense_variant	S/F	tCt/tTt	MODERATE	SNV
ABCA12	chr2	215001683.0	Frame_Shift_Ins	p.Thr913SerfsTer16	ENST00000272895	frameshift_variant	T/SX	aca/aGca	HIGH	insertion
ABCA12	chr2	214980586.0	Missense_Mutation	p.Arg1546His	ENST00000272895	missense_variant	R/H	cGc/cAc	MODERATE	SNV
ABCA12	chr2	214980560.0	Missense_Mutation	p.Leu1555Ile	ENST00000272895	missense_variant	L/I	Ctt/Att	MODERATE	SNV
ABCA12	chr2	214932712.0	Silent	p.=	ENST00000272895	synonymous_variant	K	aaG/aaA	LOW	SNV
ABCA12	chr2	214956759.0	Missense_Mutation	p.Val2046Ala	ENST00000272895	missense_variant	V/A	gTa/gCa	MODERATE	SNV
ABCA12	chr2	215000804.0	Missense_Mutation	p.Ser1027Ile	ENST00000272895	missense_variant	S/I	aGt/aTt	MODERATE	SNV
ABCA12	chr2	214989363.0	Missense_Mutation	p.Phe1265Leu	ENST00000272895	missense_variant	F/L	ttC/ttA	MODERATE	SNV
ABCA12	chr2	214990779.0	Missense_Mutation	p.Tyr1183His	ENST00000272895	missense_variant	Y/H	Tac/Cac	MODERATE	SNV
ABCA12	chr2	215019562.0	Missense_Mutation	p.Lys508Glu	ENST00000272895	missense_variant	K/E	Aaa/Gaa	MODERATE	SNV
ABCA12	chr2	214978943.0	Missense_Mutation	p.Gly1613Glu	ENST00000272895	missense_variant	G/E	gGg/gAg	MODERATE	SNV
ABCA12	chr2	215000910.0	Missense_Mutation	p.Ala992Thr	ENST00000272895	missense_variant	A/T	Gca/Aca	MODERATE	SNV
ABCA12	chr2	215052501.0	Missense_Mutation	p.Leu165Ile	ENST00000272895	missense_variant	L/I	Ctt/Att	MODERATE	SNV
ABCA12	chr2	214955268.0	Frame_Shift_Del	p.Phe2109LeufsTer25	ENST00000272895	frameshift_variant	F/X	ttT/tt	HIGH	deletion
ABCA12	chr2	215025728.0	Missense_Mutation	p.Arg411His	ENST00000272895	missense_variant	R/H	cGc/cAc	MODERATE	SNV
ABCA12	chr2	215015633.0	Missense_Mutation	p.Cys605Gly	ENST00000272895	missense_variant	C/G	Tgt/Ggt	MODERATE	SNV
ABCA12	chr2	215045978.0	Missense_Mutation	p.Gln244Pro	ENST00000272895	missense_variant	Q/P	cAg/cCg	MODERATE	SNV
ABCA12	chr2	215049728.0	Missense_Mutation	p.Phe197Leu	ENST00000272895	missense_variant	F/L	ttC/ttA	MODERATE	SNV
ABCA12	chr2	214966859.0	Missense_Mutation	p.Ala1958Val	ENST00000272895	missense_variant	A/V	gCt/gTt	MODERATE	SNV
ABCA12	chr2	215011513.0	Missense_Mutation	p.His753Arg	ENST00000272895	missense_variant	H/R	cAc/cGc	MODERATE	SNV
ABCA12	chr2	215064213.0	Missense_Mutation	p.Leu57His	ENST00000272895	missense_variant	L/H	cTc/cAc	MODERATE	SNV
ABCA12	chr2	214980622.0	Frame_Shift_Ins	p.Thr1534AsnfsTer8	ENST00000272895	frameshift_variant	T/NX	acg/aAcg	HIGH	insertion
ABCA12	chr2	214970273.0	Frame_Shift_Ins	p.Arg1897LysfsTer18	ENST00000272895	frameshift_variant;splice_region_variant	R/KX	aga/aAga	HIGH	insertion
ABCA12	chr2	214983700.0	Silent	p.=	ENST00000272895	synonymous_variant	G	ggT/ggC	LOW	SNV
ABCA12	chr2	214951082.0	Frame_Shift_Ins	p.Leu2217SerfsTer7	ENST00000272895	frameshift_variant;splice_region_variant	-/X	-/T	HIGH	insertion
ABCA12	chr2	215025750.0	Nonsense_Mutation	p.Arg404Ter	ENST00000272895	stop_gained	R/*	Cga/Tga	HIGH	SNV
ABCA12	chr2	215004208.0	Splice_Site		ENST00000272895	splice_donor_variant			HIGH	SNV
ABCA12	chr2	214990807.0	Frame_Shift_Ins	p.Asn1173LysfsTer27	ENST00000272895	frameshift_variant	N/KX	aac/aaAc	HIGH	insertion
ABCA12	chr2	215011532.0	Missense_Mutation	p.Gln747Lys	ENST00000272895	missense_variant	Q/K	Cag/Aag	MODERATE	SNV
ABCA12	chr2	215045919.0	Missense_Mutation	p.Gln264Lys	ENST00000272895	missense_variant	Q/K	Cag/Aag	MODERATE	SNV
ABCA12	chr2	214980594.0	Silent	p.=	ENST00000272895	synonymous_variant	L	ctG/ctA	LOW	SNV
ABCA12	chr2	215018105.0	Missense_Mutation	p.Val562Ala	ENST00000272895	missense_variant	V/A	gTt/gCt	MODERATE	SNV
ABCA12	chr2	214959067.0	Missense_Mutation	p.Tyr1966His	ENST00000272895	missense_variant	Y/H	Tat/Cat	MODERATE	SNV
ABCA12	chr2	215019702.0	Missense_Mutation	p.Gly461Glu	ENST00000272895	missense_variant	G/E	gGg/gAg	MODERATE	SNV
ABCA12	chr2	214997747.0	Missense_Mutation	p.Ile1081Thr	ENST00000272895	missense_variant	I/T	aTa/aCa	MODERATE	SNV
ABCA12	chr2	214974853.0	Missense_Mutation	p.Pro1798Leu	ENST00000272895	missense_variant	P/L	cCg/cTg	MODERATE	SNV
ABCA12	chr2	214980587.0	Missense_Mutation	p.Arg1546Cys	ENST00000272895	missense_variant	R/C	Cgc/Tgc	MODERATE	SNV
ABCA12	chr2	215001014.0	Frame_Shift_Ins	p.Ile957SerfsTer3	ENST00000272895	frameshift_variant	I/SX	att/aGtt	HIGH	insertion
ABCA12	chr2	214945054.0	Missense_Mutation	p.Lys2430Asn	ENST00000272895	missense_variant	K/N	aaG/aaT	MODERATE	SNV
ABCA12	chr2	214958362.0	Missense_Mutation	p.Glu2011Gly	ENST00000272895	missense_variant	E/G	gAa/gGa	MODERATE	SNV
ABCA12	chr2	214975859.0	Silent	p.=	ENST00000272895	synonymous_variant	N	aaT/aaC	LOW	SNV
ABCA12	chr2	214978355.0	Missense_Mutation	p.Asp1697Asn	ENST00000272895	missense_variant	D/N	Gat/Aat	MODERATE	SNV
ABCA12	chr2	215000964.0	Missense_Mutation	p.Asn974His	ENST00000272895	missense_variant	N/H	Aat/Cat	MODERATE	SNV
ABCA12	chr2	215001738.0	Splice_Site		ENST00000272895	splice_acceptor_variant			HIGH	SNV
ABCA12	chr2	215025749.0	Missense_Mutation	p.Arg404Gln	ENST00000272895	missense_variant	R/Q	cGa/cAa	MODERATE	SNV
ABCA12	chr2	215049736.0	Missense_Mutation	p.Asp195Tyr	ENST00000272895	missense_variant	D/Y	Gat/Tat	MODERATE	SNV
ABCA12	chr2	215064204.0	Missense_Mutation	p.Arg60Gln	ENST00000272895	missense_variant	R/Q	cGa/cAa	MODERATE	SNV
ABCA12	chr2	215138233.0	5'UTR		ENST00000272895	5_prime_UTR_variant			MODIFIER	SNV
ABCA12	chr2	215052530.0	Frame_Shift_Del	p.Phe155SerfsTer17	ENST00000272895	frameshift_variant	F/X	tTc/tc	HIGH	deletion
ABCA12	chr2	215049693.0	Missense_Mutation	p.Lys209Arg	ENST00000272895	missense_variant	K/R	aAa/aGa	MODERATE	SNV
ABCA12	chr2	214945078.0	Silent	p.=	ENST00000272895	synonymous_variant	P	ccG/ccA	LOW	SNV
ABCA12	chr2	214986696.0	Missense_Mutation	p.Pro1337Thr	ENST00000272895	missense_variant	P/T	Cct/Act	MODERATE	SNV
ABCA12	chr2	214989572.0	Missense_Mutation	p.Arg1225Gln	ENST00000272895	missense_variant	R/Q	cGa/cAa	MODERATE	SNV
ABCA12	chr2	214948727.0	Missense_Mutation	p.His2325Asn	ENST00000272895	missense_variant	H/N	Cac/Aac	MODERATE	SNV
ABCA12	chr2	215010440.0	Missense_Mutation	p.Ile788Asn	ENST00000272895	missense_variant	I/N	aTc/aAc	MODERATE	SNV
ABCA12	chr2	215045927.0	Missense_Mutation	p.Ala261Val	ENST00000272895	missense_variant	A/V	gCt/gTt	MODERATE	SNV
ABCA12	chr2	215049772.0	Nonsense_Mutation	p.Glu183Ter	ENST00000272895	stop_gained	E/*	Gaa/Taa	HIGH	SNV
ABCA12	chr2	214978431.0	Frame_Shift_Ins	p.Asn1671LysfsTer2	ENST00000272895	frameshift_variant	N/KX	aat/aaAt	HIGH	insertion
ABCA12	chr2	215001570.0	Missense_Mutation	p.Glu951Lys	ENST00000272895	missense_variant	E/K	Gaa/Aaa	MODERATE	SNV
ABCA12	chr2	215025736.0	Silent	p.=	ENST00000272895	synonymous_variant	S	tcT/tcG	LOW	SNV
ABCA12	chr2	215064112.0	Missense_Mutation	p.Asp91Tyr	ENST00000272895	missense_variant	D/Y	Gat/Tat	MODERATE	SNV
ABCA12	chr2	214956772.0	Frame_Shift_Ins	p.Tyr2042LeufsTer23	ENST00000272895	frameshift_variant	-/X	-/C	HIGH	insertion
ABCA12	chr2	214956774.0	Nonsense_Mutation	p.Phe2041delinsTer	ENST00000272895	stop_gained	F/*V	ttc/tAAGtc	HIGH	insertion
ABCA12	chr2	215015552.0	Nonsense_Mutation	p.Gln632Ter	ENST00000272895	stop_gained	Q/*	Cag/Tag	HIGH	SNV
ABCA12	chr2	214934162.0	Silent	p.=	ENST00000272895	synonymous_variant	V	gtC/gtT	LOW	SNV
ABCA12	chr2	214945079.0	Missense_Mutation	p.Pro2422Leu	ENST00000272895	missense_variant	P/L	cCg/cTg	MODERATE	SNV
ABCA12	chr2	214937608.0	Nonsense_Mutation	p.Arg2482Ter	ENST00000272895	stop_gained	R/*	Cga/Tga	HIGH	SNV
ZNF469	chr16	88433604.0	Missense_Mutation	p.Ala2017Val	ENST00000437464	missense_variant	A/V	gCc/gTc	MODERATE	SNV
ZNF469	chr16	88436096.0	Missense_Mutation	p.His2848Tyr	ENST00000437464	missense_variant	H/Y	Cat/Tat	MODERATE	SNV
ZNF469	chr16	88437795.0	Frame_Shift_Del	p.Arg3417GlyfsTer56	ENST00000437464	frameshift_variant	R/X	aGg/ag	HIGH	deletion
ZNF469	chr16	88433544.0	Missense_Mutation	p.Ala1997Val	ENST00000437464	missense_variant	A/V	gCg/gTg	MODERATE	SNV
ZNF469	chr16	88429831.0	Silent	p.=	ENST00000437464	synonymous_variant	H	caC/caT	LOW	SNV
ZNF469	chr16	88431003.0	Missense_Mutation	p.Leu1150Arg	ENST00000437464	missense_variant	L/R	cTg/cGg	MODERATE	SNV
ZNF469	chr16	88432349.0	Missense_Mutation	p.Leu1599Phe	ENST00000437464	missense_variant	L/F	Ctc/Ttc	MODERATE	SNV
ZNF469	chr16	88436209.0	Silent	p.=	ENST00000437464	synonymous_variant	S	agC/agT	LOW	SNV
ZNF469	chr16	88431996.0	Missense_Mutation	p.Pro1481Leu	ENST00000437464	missense_variant	P/L	cCg/cTg	MODERATE	SNV
ZNF469	chr16	88439006.0	Silent	p.=	ENST00000437464	synonymous_variant	R	Cgg/Agg	LOW	SNV
ZNF469	chr16	88433884.0	Silent	p.=	ENST00000437464	synonymous_variant	S	tcG/tcA	LOW	SNV
ZNF469	chr16	88438633.0	Silent	p.=	ENST00000437464	synonymous_variant	P	ccC/ccT	LOW	SNV
ZNF469	chr16	88437328.0	Silent	p.=	ENST00000437464	synonymous_variant	A	gcG/gcA	LOW	SNV
ZNF469	chr16	88439369.0	3'UTR		ENST00000437464	3_prime_UTR_variant			MODIFIER	SNV
ZNF469	chr16	88430204.0	Missense_Mutation	p.Arg912Cys	ENST00000437464	missense_variant	R/C	Cgc/Tgc	MODERATE	SNV
ZNF469	chr16	88436595.0	Missense_Mutation	p.Arg3014His	ENST00000437464	missense_variant	R/H	cGt/cAt	MODERATE	SNV
ZNF469	chr16	88435993.0	Silent	p.=	ENST00000437464	synonymous_variant	A	gcC/gcT	LOW	SNV
ZNF469	chr16	88436705.0	Missense_Mutation	p.Glu3051Lys	ENST00000437464	missense_variant	E/K	Gag/Aag	MODERATE	SNV
ZNF469	chr16	88438809.0	Frame_Shift_Ins	p.Ala3754ArgfsTer17	ENST00000437464	frameshift_variant	L/LX	ctc/ctCc	HIGH	insertion
ZNF469	chr16	88428098.0	Frame_Shift_Del	p.Gln212ArgfsTer134	ENST00000437464	frameshift_variant	P/X	Ccc/cc	HIGH	deletion
ZNF469	chr16	88428214.0	Silent	p.=	ENST00000437464	synonymous_variant	F	ttC/ttT	LOW	SNV
ZNF469	chr16	88431273.0	Missense_Mutation	p.Pro1240Gln	ENST00000437464	missense_variant	P/Q	cCg/cAg	MODERATE	SNV
ZNF469	chr16	88439179.0	Silent	p.=	ENST00000437464	synonymous_variant	R	agG/agA	LOW	SNV
ZNF469	chr16	88437282.0	Missense_Mutation	p.Ala3243Val	ENST00000437464	missense_variant	A/V	gCg/gTg	MODERATE	SNV
ZNF469	chr16	88437769.0	Silent	p.=	ENST00000437464	synonymous_variant	F	ttC/ttT	LOW	SNV
ZNF469	chr16	88432064.0	Missense_Mutation	p.Arg1504Trp	ENST00000437464	missense_variant	R/W	Cgg/Tgg	MODERATE	SNV
ZNF469	chr16	88436610.0	Missense_Mutation	p.Glu3019Gly	ENST00000437464	missense_variant	E/G	gAg/gGg	MODERATE	SNV
ZNF469	chr16	88433322.0	Missense_Mutation	p.Ala1923Val	ENST00000437464	missense_variant	A/V	gCc/gTc	MODERATE	SNV
ZNF469	chr16	88436528.0	Missense_Mutation	p.Pro2992Ser	ENST00000437464	missense_variant	P/S	Ccc/Tcc	MODERATE	SNV
ZNF469	chr16	88429426.0	Frame_Shift_Ins	p.His655ProfsTer83	ENST00000437464	frameshift_variant	-/X	-/C	HIGH	insertion
ZNF469	chr16	88429427.0	Frame_Shift_Del	p.His655ThrfsTer77	ENST00000437464	frameshift_variant	P/X	Ccc/cc	HIGH	deletion
ZNF469	chr16	88432316.0	Missense_Mutation	p.Val1588Met	ENST00000437464	missense_variant	V/M	Gtg/Atg	MODERATE	SNV
ZNF469	chr16	88428203.0	Missense_Mutation	p.Gly245Cys	ENST00000437464	missense_variant	G/C	Ggt/Tgt	MODERATE	SNV
ZNF469	chr16	88439000.0	Frame_Shift_Del	p.Arg3818GlyfsTer95	ENST00000437464	frameshift_variant	P/X	Ccc/cc	HIGH	deletion
ZNF469	chr16	88437405.0	Frame_Shift_Del	p.Asp3286ThrfsTer124	ENST00000437464	frameshift_variant	S/X	tCc/tc	HIGH	deletion
ZNF469	chr16	88428659.0	Frame_Shift_Del	p.Pro398LeufsTer104	ENST00000437464	frameshift_variant	P/X	Ccc/cc	HIGH	deletion
ZNF469	chr16	88431424.0	Frame_Shift_Del	p.Pro1292LeufsTer235	ENST00000437464	frameshift_variant	D/X	gaC/ga	HIGH	deletion
ZNF469	chr16	88431808.0	Silent	p.=	ENST00000437464	synonymous_variant	S	tcG/tcA	LOW	SNV
ZNF469	chr16	88428493.0	Missense_Mutation	p.Gln341His	ENST00000437464	missense_variant	Q/H	caG/caT	MODERATE	SNV
ZNF469	chr16	88428075.0	Frame_Shift_Del	p.Arg204GlyfsTer142	ENST00000437464	frameshift_variant	T/X	aCc/ac	HIGH	deletion
ZNF469	chr16	88437173.0	Missense_Mutation	p.Ala3207Thr	ENST00000437464	missense_variant	A/T	Gcg/Acg	MODERATE	SNV
ZNF469	chr16	88436672.0	Missense_Mutation	p.Val3040Met	ENST00000437464	missense_variant	V/M	Gtg/Atg	MODERATE	SNV
ZNF469	chr16	88438444.0	Frame_Shift_Del	p.Arg3634GlufsTer58	ENST00000437464	frameshift_variant	E/X	gaG/ga	HIGH	deletion
ZNF469	chr16	88434167.0	Missense_Mutation	p.Val2205Ile	ENST00000437464	missense_variant	V/I	Gtc/Atc	MODERATE	SNV
ZNF469	chr16	88428909.0	Frame_Shift_Del	p.Leu482CysfsTer20	ENST00000437464	frameshift_variant	A/X	gCc/gc	HIGH	deletion
ZNF469	chr16	88430032.0	Silent	p.=	ENST00000437464	synonymous_variant	Q	caG/caA	LOW	SNV
ZNF469	chr16	88433369.0	Missense_Mutation	p.Leu1939Ile	ENST00000437464	missense_variant	L/I	Ctc/Atc	MODERATE	SNV
ZNF469	chr16	88433167.0	Frame_Shift_Del	p.Ile1874TyrfsTer24	ENST00000437464	frameshift_variant	S/X	agC/ag	HIGH	deletion
ZNF469	chr16	88431801.0	Missense_Mutation	p.Ala1416Val	ENST00000437464	missense_variant	A/V	gCt/gTt	MODERATE	SNV
ZNF469	chr16	88435963.0	Silent	p.=	ENST00000437464	synonymous_variant	V	gtC/gtT	LOW	SNV
ZNF469	chr16	88436557.0	Silent	p.=	ENST00000437464	synonymous_variant	D	gaC/gaT	LOW	SNV
ZNF469	chr16	88428083.0	Frame_Shift_Del	p.Pro206GlnfsTer140	ENST00000437464	frameshift_variant	P/X	Ccc/cc	HIGH	deletion
ZNF469	chr16	88434735.0	Frame_Shift_Del	p.Gln2396LysfsTer49	ENST00000437464	frameshift_variant	S/X	tCc/tc	HIGH	deletion
ZNF469	chr16	88436589.0	Missense_Mutation	p.Pro3012Leu	ENST00000437464	missense_variant	P/L	cCg/cTg	MODERATE	SNV
ZNF469	chr16	88437615.0	Missense_Mutation	p.Ala3354Val	ENST00000437464	missense_variant	A/V	gCa/gTa	MODERATE	SNV
ZNF469	chr16	88436704.0	Silent	p.=	ENST00000437464	synonymous_variant	F	ttC/ttT	LOW	SNV
ZNF469	chr16	88430011.0	Silent	p.=	ENST00000437464	synonymous_variant	A	gcG/gcA	LOW	SNV
ZNF469	chr16	88436200.0	Silent	p.=	ENST00000437464	synonymous_variant	T	acG/acA	LOW	SNV
ZNF469	chr16	88436594.0	Missense_Mutation	p.Arg3014Cys	ENST00000437464	missense_variant	R/C	Cgt/Tgt	MODERATE	SNV
ZNF469	chr16	88434764.0	Missense_Mutation	p.Gln2404Lys	ENST00000437464	missense_variant	Q/K	Cag/Aag	MODERATE	SNV
ZNF469	chr16	88429603.0	Silent	p.=	ENST00000437464	synonymous_variant	P	ccG/ccA	LOW	SNV
ZNF469	chr16	88428565.0	Silent	p.=	ENST00000437464	synonymous_variant	P	ccG/ccA	LOW	SNV
COL27A1	chr9	114231836.0	Silent	p.=	ENST00000356083	synonymous_variant	S	agC/agT	LOW	SNV
COL27A1	chr9	114275735.0	Silent	p.=	ENST00000356083	synonymous_variant	G	ggG/ggC	LOW	SNV
COL27A1	chr9	114168052.0	Missense_Mutation	p.Arg166His	ENST00000356083	missense_variant	R/H	cGc/cAc	MODERATE	SNV
COL27A1	chr9	114275661.0	Missense_Mutation	p.Gly1204Arg	ENST00000356083	missense_variant;splice_region_variant	G/R	Ggg/Agg	MODERATE	SNV
COL27A1	chr9	114217893.0	Intron		ENST00000356083	intron_variant			MODIFIER	SNV
COL27A1	chr9	114309448.0	Missense_Mutation	p.Phe1802Leu	ENST00000356083	missense_variant	F/L	ttC/ttA	MODERATE	SNV
COL27A1	chr9	114309449.0	Missense_Mutation	p.Arg1803Trp	ENST00000356083	missense_variant	R/W	Cgg/Tgg	MODERATE	SNV
COL27A1	chr9	114194445.0	Silent	p.=	ENST00000356083	synonymous_variant	H	caC/caT	LOW	SNV
COL27A1	chr9	114309401.0	Missense_Mutation	p.Arg1787Cys	ENST00000356083	missense_variant	R/C	Cgc/Tgc	MODERATE	SNV
COL27A1	chr9	114245892.0	Silent	p.=	ENST00000356083	synonymous_variant	P	ccG/ccA	LOW	SNV
COL27A1	chr9	114304649.0	Silent	p.=	ENST00000356083	synonymous_variant	D	gaC/gaT	LOW	SNV
COL27A1	chr9	114290824.0	Silent	p.=	ENST00000356083	synonymous_variant	D	gaC/gaT	LOW	SNV
COL27A1	chr9	114290248.0	Missense_Mutation	p.Arg1429Trp	ENST00000356083	missense_variant	R/W	Cgg/Tgg	MODERATE	SNV
COL27A1	chr9	114169435.0	Missense_Mutation	p.Pro627Leu	ENST00000356083	missense_variant	P/L	cCg/cTg	MODERATE	SNV
COL27A1	chr9	114162714.0	Splice_Site	p.Leu24SerfsTer6	ENST00000356083	splice_acceptor_variant			HIGH	deletion
COL27A1	chr9	114168711.0	Missense_Mutation	p.His386Asn	ENST00000356083	missense_variant	H/N	Cat/Aat	MODERATE	SNV
COL27A1	chr9	114267532.0	Missense_Mutation	p.Gly1159Asp	ENST00000356083	missense_variant	G/D	gGc/gAc	MODERATE	SNV
COL27A1	chr9	114169427.0	Missense_Mutation	p.Met624Ile	ENST00000356083	missense_variant	M/I	atG/atT	MODERATE	SNV
COL27A1	chr9	114168866.0	Silent	p.=	ENST00000356083	synonymous_variant	P	ccG/ccA	LOW	SNV
COL27A1	chr9	114237698.0	Missense_Mutation	p.Gly904Arg	ENST00000356083	missense_variant	G/R	Ggg/Agg	MODERATE	SNV
COL27A1	chr9	114169019.0	Silent	p.=	ENST00000356083	synonymous_variant	S	tcC/tcA	LOW	SNV
COL27A1	chr9	114243555.0	Missense_Mutation	p.Val977Met	ENST00000356083	missense_variant	V/M	Gtg/Atg	MODERATE	SNV
COL27A1	chr9	114194441.0	Missense_Mutation	p.Ala685Val	ENST00000356083	missense_variant	A/V	gCc/gTc	MODERATE	SNV
COL27A1	chr9	114237713.0	Missense_Mutation	p.Glu909Lys	ENST00000356083	missense_variant;splice_region_variant	E/K	Gag/Aag	MODERATE	SNV
COL27A1	chr9	114309313.0	Silent	p.=	ENST00000356083	synonymous_variant	S	tcC/tcT	LOW	SNV
COL27A1	chr9	114168608.0	Silent	p.=	ENST00000356083	synonymous_variant	A	gcG/gcT	LOW	SNV
COL27A1	chr9	114288726.0	Missense_Mutation	p.Arg1357Cys	ENST00000356083	missense_variant	R/C	Cgc/Tgc	MODERATE	SNV
COL27A1	chr9	114209702.0	Missense_Mutation	p.Gly766Ser	ENST00000356083	missense_variant	G/S	Ggc/Agc	MODERATE	SNV
COL27A1	chr9	114270754.0	Missense_Mutation	p.Ser1194Arg	ENST00000356083	missense_variant	S/R	agT/agA	MODERATE	SNV
COL27A1	chr9	114242185.0	Splice_Site		ENST00000356083	splice_acceptor_variant			HIGH	SNV
COL27A1	chr9	114245891.0	Missense_Mutation	p.Pro987Leu	ENST00000356083	missense_variant	P/L	cCg/cTg	MODERATE	SNV
COL27A1	chr9	114290101.0	Frame_Shift_Del	p.Val1419SerfsTer148	ENST00000356083	frameshift_variant	R/X	aGg/ag	HIGH	deletion
COL27A1	chr9	114290098.0	Missense_Mutation	p.Arg1416Gln	ENST00000356083	missense_variant	R/Q	cGg/cAg	MODERATE	SNV
COL27A1	chr9	114290313.0	Silent	p.=	ENST00000356083	synonymous_variant	D	gaC/gaT	LOW	SNV
COL27A1	chr9	114292137.0	Missense_Mutation	p.Pro1504His	ENST00000356083	missense_variant	P/H	cCt/cAt	MODERATE	SNV
COL27A1	chr9	114168979.0	Missense_Mutation	p.Arg475His	ENST00000356083	missense_variant	R/H	cGc/cAc	MODERATE	SNV
COL27A1	chr9	114168906.0	Frame_Shift_Del	p.Lys452AsnfsTer6	ENST00000356083	frameshift_variant	K/X	Aaa/aa	HIGH	deletion
COL27A1	chr9	114222243.0	Frame_Shift_Del	p.Pro816LeufsTer10	ENST00000356083	frameshift_variant	G/X	ggC/gg	HIGH	deletion
COL27A1	chr9	114264955.0	Missense_Mutation	p.Arg1094Gln	ENST00000356083	missense_variant	R/Q	cGg/cAg	MODERATE	SNV
COL27A1	chr9	114168601.0	Frame_Shift_Ins	p.Ala351CysfsTer101	ENST00000356083	frameshift_variant	R/RX	cgc/cgCc	HIGH	insertion
COL27A1	chr9	114309356.0	Missense_Mutation	p.Val1772Met	ENST00000356083	missense_variant	V/M	Gtg/Atg	MODERATE	SNV
COL27A1	chr9	114282496.0	Missense_Mutation	p.Val1271Ile	ENST00000356083	missense_variant	V/I	Gtc/Atc	MODERATE	SNV
COL27A1	chr9	114168014.0	Silent	p.=	ENST00000356083	synonymous_variant	D	gaC/gaT	LOW	SNV
COL27A1	chr9	114235651.0	Missense_Mutation	p.Lys873Arg	ENST00000356083	missense_variant;splice_region_variant	K/R	aAg/aGg	MODERATE	SNV
COL27A1	chr9	114310593.0	Silent	p.=	ENST00000356083	synonymous_variant	T	acC/acA	LOW	SNV
COL27A1	chr9	114231087.0	Missense_Mutation	p.Leu825Phe	ENST00000356083	missense_variant	L/F	ttA/ttC	MODERATE	SNV
COL27A1	chr9	114240240.0	Frame_Shift_Del	p.Pro918LeufsTer9	ENST00000356083	frameshift_variant	G/X	ggC/gg	HIGH	deletion
COL27A1	chr9	114167839.0	Missense_Mutation	p.Gly95Asp	ENST00000356083	missense_variant	G/D	gGc/gAc	MODERATE	SNV
COL27A1	chr9	114168601.0	Missense_Mutation	p.Arg349His	ENST00000356083	missense_variant	R/H	cGc/cAc	MODERATE	SNV
COL27A1	chr9	114231839.0	Frame_Shift_Del	p.Glu848SerfsTer4	ENST00000356083	frameshift_variant	V/X	gtG/gt	HIGH	deletion
COL27A1	chr9	114237008.0	Missense_Mutation	p.Gly883Ser	ENST00000356083	missense_variant	G/S	Ggt/Agt	MODERATE	SNV
COL27A1	chr9	114307715.0	Silent	p.=	ENST00000356083	synonymous_variant	I	atC/atT	LOW	SNV
COL27A1	chr9	114168365.0	Missense_Mutation	p.Glu270Asp	ENST00000356083	missense_variant	E/D	gaG/gaT	MODERATE	SNV
COL27A1	chr9	114217894.0	Intron		ENST00000356083	intron_variant			MODIFIER	SNV
COL27A1	chr9	114252592.0	Splice_Site		ENST00000356083	splice_acceptor_variant			HIGH	SNV
COL27A1	chr9	114169362.0	Missense_Mutation	p.Arg603Trp	ENST00000356083	missense_variant	R/W	Cgg/Tgg	MODERATE	SNV
COL27A1	chr9	114167901.0	Missense_Mutation	p.Ala116Thr	ENST00000356083	missense_variant	A/T	Gct/Act	MODERATE	SNV
COL27A1	chr9	114283745.0	Missense_Mutation	p.Gly1306Arg	ENST00000356083	missense_variant	G/R	Gga/Aga	MODERATE	SNV
COL27A1	chr9	114168716.0	Silent	p.=	ENST00000356083	synonymous_variant	P	ccT/ccC	LOW	SNV
COL27A1	chr9	114194456.0	Missense_Mutation	p.Lys690Thr	ENST00000356083	missense_variant;splice_region_variant	K/T	aAg/aCg	MODERATE	SNV
COL27A1	chr9	114290825.0	Missense_Mutation	p.Asp1462Asn	ENST00000356083	missense_variant	D/N	Gat/Aat	MODERATE	SNV
COL27A1	chr9	114167827.0	Frame_Shift_Del	p.Ala92GlufsTer108	ENST00000356083	frameshift_variant	PAALGTELALV/X	cCTGCCGCCTTGGGCACAGAGCTGGCACTGGTG/c	HIGH	deletion
COL27A1	chr9	114196014.0	Splice_Site		ENST00000356083	splice_donor_variant			HIGH	SNV
COL27A1	chr9	114167791.0	Missense_Mutation	p.Arg79Gln	ENST00000356083	missense_variant	R/Q	cGg/cAg	MODERATE	SNV
COL27A1	chr9	114195975.0	Missense_Mutation	p.Pro696His	ENST00000356083	missense_variant	P/H	cCt/cAt	MODERATE	SNV
COL27A1	chr9	114245869.0	Missense_Mutation	p.Glu980Lys	ENST00000356083	missense_variant	E/K	Gaa/Aaa	MODERATE	SNV
COL27A1	chr9	114264382.0	Frame_Shift_Del	p.Glu1076SerfsTer7	ENST00000356083	frameshift_variant	G/X	Ggg/gg	HIGH	deletion
COL7A1	chr3	48575677.0	Silent	p.=	ENST00000328333	synonymous_variant	R	cgG/cgA	LOW	SNV
COL7A1	chr3	48592126.0	Missense_Mutation	p.Ala406Thr	ENST00000328333	missense_variant	A/T	Gcc/Acc	MODERATE	SNV
COL7A1	chr3	48581123.0	Missense_Mutation	p.Pro1645Leu	ENST00000328333	missense_variant;splice_region_variant	P/L	cCg/cTg	MODERATE	SNV
COL7A1	chr3	48585074.0	Missense_Mutation	p.Ala1313Thr	ENST00000328333	missense_variant	A/T	Gcc/Acc	MODERATE	SNV
COL7A1	chr3	48587032.0	Silent	p.=	ENST00000328333	synonymous_variant	T	acG/acA	LOW	SNV
COL7A1	chr3	48590470.0	Missense_Mutation	p.Ser632Asn	ENST00000328333	missense_variant	S/N	aGc/aAc	MODERATE	SNV
COL7A1	chr3	48594401.0	Missense_Mutation	p.Arg78His	ENST00000328333	missense_variant	R/H	cGc/cAc	MODERATE	SNV
COL7A1	chr3	48569762.0	Splice_Site		ENST00000328333	splice_acceptor_variant			HIGH	SNV
COL7A1	chr3	48580604.0	Missense_Mutation	p.Asp1677Tyr	ENST00000328333	missense_variant	D/Y	Gat/Tat	MODERATE	SNV
COL7A1	chr3	48589636.0	Silent	p.=	ENST00000328333	synonymous_variant	G	ggC/ggT	LOW	SNV
COL7A1	chr3	48586195.0	Missense_Mutation	p.Arg1201His	ENST00000328333	missense_variant	R/H	cGt/cAt	MODERATE	SNV
COL7A1	chr3	48572694.0	Missense_Mutation	p.Gly2293Ser	ENST00000328333	missense_variant	G/S	Ggc/Agc	MODERATE	SNV
COL7A1	chr3	48585585.0	Missense_Mutation	p.Pro1289Leu	ENST00000328333	missense_variant	P/L	cCt/cTt	MODERATE	SNV
COL7A1	chr3	48590773.0	Silent	p.=	ENST00000328333	synonymous_variant	F	ttC/ttT	LOW	SNV
COL7A1	chr3	48575359.0	Missense_Mutation	p.Ala2054Thr	ENST00000328333	missense_variant	A/T	Gca/Aca	MODERATE	SNV
COL7A1	chr3	48570145.0	Nonsense_Mutation	p.Arg2492Ter	ENST00000328333	stop_gained	R/*	Cga/Tga	HIGH	SNV
COL7A1	chr3	48564827.0	Missense_Mutation	p.Cys2925Tyr	ENST00000328333	missense_variant	C/Y	tGc/tAc	MODERATE	SNV
COL7A1	chr3	48582345.0	Missense_Mutation	p.Arg1538His	ENST00000328333	missense_variant	R/H	cGc/cAc	MODERATE	SNV
COL7A1	chr3	48591978.0	Missense_Mutation	p.Leu426Pro	ENST00000328333	missense_variant	L/P	cTg/cCg	MODERATE	SNV
COL7A1	chr3	48591950.0	Frame_Shift_Del	p.Trp435Ter	ENST00000328333	frameshift_variant	W/X	tgG/tg	HIGH	deletion
COL7A1	chr3	48589665.0	Missense_Mutation	p.Val702Ile	ENST00000328333	missense_variant	V/I	Gtc/Atc	MODERATE	SNV
COL7A1	chr3	48593154.0	Silent	p.=	ENST00000328333	synonymous_variant	L	ctC/ctT	LOW	SNV
COL7A1	chr3	48573345.0	Frame_Shift_Del	p.Glu2208SerfsTer12	ENST00000328333	frameshift_variant	E/X	Gag/ag	HIGH	deletion
COL7A1	chr3	48566921.0	Missense_Mutation	p.Leu2738Val	ENST00000328333	missense_variant	L/V	Ctt/Gtt	MODERATE	SNV
COL7A1	chr3	48590237.0	Missense_Mutation	p.Ala676Thr	ENST00000328333	missense_variant	A/T	Gct/Act	MODERATE	SNV
COL7A1	chr3	48578499.0	Missense_Mutation	p.Arg1814His	ENST00000328333	missense_variant	R/H	cGt/cAt	MODERATE	SNV
COL7A1	chr3	48564331.0	3'UTR		ENST00000328333	3_prime_UTR_variant			MODIFIER	deletion
COL7A1	chr3	48592211.0	Missense_Mutation	p.Gln377His	ENST00000328333	missense_variant	Q/H	caG/caT	MODERATE	SNV
COL7A1	chr3	48570166.0	Missense_Mutation	p.Arg2485Cys	ENST00000328333	missense_variant	R/C	Cgc/Tgc	MODERATE	SNV
COL7A1	chr3	48564297.0	3'UTR		ENST00000328333	3_prime_UTR_variant			MODIFIER	SNV
COL7A1	chr3	48566910.0	Missense_Mutation	p.Gln2741His	ENST00000328333	missense_variant	Q/H	caG/caT	MODERATE	SNV
COL7A1	chr3	48579490.0	Frame_Shift_Del	p.Pro1754GlnfsTer87	ENST00000328333	frameshift_variant	P/X	cCa/ca	HIGH	deletion
COL7A1	chr3	48575438.0	Frame_Shift_Del	p.Pro2029LeufsTer177	ENST00000328333	frameshift_variant	P/X	ccC/cc	HIGH	deletion
COL7A1	chr3	48583737.0	Frame_Shift_Del	p.Pro1441LeufsTer269	ENST00000328333	frameshift_variant	P/X	cCt/ct	HIGH	deletion
COL7A1	chr3	48584368.0	Frame_Shift_Del	p.Pro1376LeufsTer23	ENST00000328333	frameshift_variant	P/X	cCt/ct	HIGH	deletion
COL7A1	chr3	48586667.0	Missense_Mutation	p.His1100Arg	ENST00000328333	missense_variant	H/R	cAt/cGt	MODERATE	SNV
COL7A1	chr3	48591532.0	Missense_Mutation	p.Arg523Gln	ENST00000328333	missense_variant	R/Q	cGg/cAg	MODERATE	SNV
COL7A1	chr3	48568791.0	Missense_Mutation	p.Gly2584Val	ENST00000328333	missense_variant	G/V	gGa/gTa	MODERATE	SNV
COL7A1	chr3	48567885.0	Missense_Mutation	p.Arg2628Trp	ENST00000328333	missense_variant	R/W	Cgg/Tgg	MODERATE	SNV
COL7A1	chr3	48564819.0	Missense_Mutation	p.Arg2928Cys	ENST00000328333	missense_variant	R/C	Cgc/Tgc	MODERATE	SNV
COL7A1	chr3	48566991.0	Frame_Shift_Del	p.Ser2715ValfsTer71	ENST00000328333	frameshift_variant	P/X	ccC/cc	HIGH	deletion
COL7A1	chr3	48580035.0	Missense_Mutation	p.Arg1707Gln	ENST00000328333	missense_variant	R/Q	cGg/cAg	MODERATE	SNV
COL7A1	chr3	48588376.0	Silent	p.=	ENST00000328333	synonymous_variant	T	acG/acA	LOW	SNV
COL7A1	chr3	48575636.0	Frame_Shift_Del	p.Pro1990GlnfsTer15	ENST00000328333	frameshift_variant	P/X	cCa/ca	HIGH	deletion
COL7A1	chr3	48593618.0	Frame_Shift_Ins	p.Asn116GlnfsTer13	ENST00000328333	frameshift_variant	G/GX	ggc/ggGc	HIGH	insertion
COL7A1	chr3	48573197.0	Missense_Mutation	p.Pro2231Thr	ENST00000328333	missense_variant	P/T	Ccc/Acc	MODERATE	SNV
COL7A1	chr3	48588785.0	Missense_Mutation	p.Gly815Asp	ENST00000328333	missense_variant	G/D	gGc/gAc	MODERATE	SNV
COL7A1	chr3	48590721.0	Nonsense_Mutation	p.Arg578Ter	ENST00000328333	stop_gained	R/*	Cga/Tga	HIGH	SNV
COL7A1	chr3	48576762.0	Missense_Mutation	p.Gly1872Ser	ENST00000328333	missense_variant	G/S	Ggc/Agc	MODERATE	SNV
COL7A1	chr3	48565193.0	Missense_Mutation	p.Pro2846Ser	ENST00000328333	missense_variant	P/S	Ccc/Tcc	MODERATE	SNV
COL7A1	chr3	48565433.0	Missense_Mutation	p.Arg2835His	ENST00000328333	missense_variant	R/H	cGc/cAc	MODERATE	SNV
COL7A1	chr3	48591752.0	Silent	p.=	ENST00000328333	synonymous_variant	P	ccG/ccA	LOW	SNV
COL7A1	chr3	48572678.0	Frame_Shift_Del	p.Pro2298LeufsTer90	ENST00000328333	frameshift_variant	P/X	cCt/ct	HIGH	deletion
COL7A1	chr3	48573864.0	Frame_Shift_Ins	p.Gly2177TrpfsTer113	ENST00000328333	frameshift_variant	P/PX	cct/ccCt	HIGH	insertion
COL7A1	chr3	48586239.0	Silent	p.=	ENST00000328333	synonymous_variant	N	aaT/aaC	LOW	SNV
COL7A1	chr3	48567595.0	Missense_Mutation	p.Lys2675Asn	ENST00000328333	missense_variant	K/N	aaG/aaT	MODERATE	SNV
COL7A1	chr3	48565649.0	Silent	p.=	ENST00000328333	synonymous_variant	I	atC/atT	LOW	SNV
COL7A1	chr3	48575236.0	Missense_Mutation	p.Arg2063Trp	ENST00000328333	missense_variant	R/W	Cgg/Tgg	MODERATE	SNV
COL7A1	chr3	48575445.0	Missense_Mutation	p.Gly2025Ala	ENST00000328333	missense_variant	G/A	gGc/gCc	MODERATE	SNV
COL7A1	chr3	48581301.0	Missense_Mutation	p.Arg1620Trp	ENST00000328333	missense_variant	R/W	Cgg/Tgg	MODERATE	SNV
COL7A1	chr3	48593640.0	Missense_Mutation	p.Arg108His	ENST00000328333	missense_variant	R/H	cGt/cAt	MODERATE	SNV
COL7A1	chr3	48587243.0	Missense_Mutation	p.Thr1029Met	ENST00000328333	missense_variant	T/M	aCg/aTg	MODERATE	SNV
COL7A1	chr3	48592176.0	Missense_Mutation	p.Thr389Met	ENST00000328333	missense_variant	T/M	aCg/aTg	MODERATE	SNV
COL7A1	chr3	48590495.0	Missense_Mutation	p.Ala624Thr	ENST00000328333	missense_variant	A/T	Gcc/Acc	MODERATE	SNV
COL7A1	chr3	48588677.0	Missense_Mutation	p.Arg851His	ENST00000328333	missense_variant	R/H	cGc/cAc	MODERATE	SNV
COL7A1	chr3	48593650.0	Missense_Mutation	p.Arg105Cys	ENST00000328333	missense_variant	R/C	Cgc/Tgc	MODERATE	SNV
COL7A1	chr3	48568499.0	Splice_Region	p.=	ENST00000328333	splice_region_variant;synonymous_variant	P	ccG/ccA	LOW	SNV
BRCA2	chr13	32339422.0	Frame_Shift_Del	p.Lys1691AsnfsTer15	ENST00000380152	frameshift_variant	A/X	gcA/gc	HIGH	deletion
BRCA2	chr13	32332913.0	Missense_Mutation	p.Asp479Tyr	ENST00000380152	missense_variant	D/Y	Gac/Tac	MODERATE	SNV
BRCA2	chr13	32337930.0	Missense_Mutation	p.Phe1192Cys	ENST00000380152	missense_variant	F/C	tTt/tGt	MODERATE	SNV
BRCA2	chr13	32379787.0	Nonsense_Mutation	p.Tyr2997Ter	ENST00000380152	stop_gained	Y/*	taT/taG	HIGH	SNV
BRCA2	chr13	32398469.0	Missense_Mutation	p.Ser3319Tyr	ENST00000380152	missense_variant	S/Y	tCt/tAt	MODERATE	SNV
BRCA2	chr13	32363251.0	Frame_Shift_Del	p.Thr2685HisfsTer9	ENST00000380152	frameshift_variant	A/X	gcA/gc	HIGH	deletion
BRCA2	chr13	32340236.0	Missense_Mutation	p.Ser1961Gly	ENST00000380152	missense_variant	S/G	Agt/Ggt	MODERATE	SNV
BRCA2	chr13	32340618.0	Missense_Mutation	p.Thr2088Ser	ENST00000380152	missense_variant	T/S	aCt/aGt	MODERATE	SNV
BRCA2	chr13	32330932.0	Missense_Mutation	p.Tyr232Cys	ENST00000380152	missense_variant	Y/C	tAt/tGt	MODERATE	SNV
BRCA2	chr13	32339045.0	Missense_Mutation	p.Ala1564Thr	ENST00000380152	missense_variant	A/T	Gca/Aca	MODERATE	SNV
BRCA2	chr13	32338832.0	Nonsense_Mutation	p.Glu1493Ter	ENST00000380152	stop_gained	E/*	Gaa/Taa	HIGH	SNV
BRCA2	chr13	32356530.0	Frame_Shift_Ins	p.Thr2515AsnfsTer24	ENST00000380152	frameshift_variant	A/AX	gca/gcAa	HIGH	insertion
BRCA2	chr13	32340646.0	Silent	p.=	ENST00000380152	synonymous_variant	T	acG/acA	LOW	SNV
BRCA2	chr13	32339700.0	Frame_Shift_Del	p.Asn1784ThrfsTer7	ENST00000380152	frameshift_variant	Q/X	cAa/ca	HIGH	deletion
BRCA2	chr13	32338391.0	Missense_Mutation	p.Thr1346Ala	ENST00000380152	missense_variant	T/A	Act/Gct	MODERATE	SNV
BRCA2	chr13	32333006.0	Nonsense_Mutation	p.Glu510Ter	ENST00000380152	stop_gained	E/*	Gaa/Taa	HIGH	SNV
BRCA2	chr13	32332429.0	Frame_Shift_Del	p.Asn319IlefsTer5	ENST00000380152	frameshift_variant	T/X	acA/ac	HIGH	deletion
BRCA2	chr13	32355160.0	Missense_Mutation	p.Asn2436Ser	ENST00000380152	missense_variant	N/S	aAc/aGc	MODERATE	SNV
BRCA2	chr13	32336987.0	Missense_Mutation	p.Asp878Asn	ENST00000380152	missense_variant	D/N	Gac/Aac	MODERATE	SNV
BRCA2	chr13	32337311.0	In_Frame_Del	p.Asn987del	ENST00000380152	inframe_deletion	N/-	AAT/-	MODERATE	deletion
BRCA2	chr13	32370993.0	Missense_Mutation	p.Arg2842His	ENST00000380152	missense_variant	R/H	cGc/cAc	MODERATE	SNV
BRCA2	chr13	32316501.0	Frame_Shift_Del	p.Phe15LeufsTer10	ENST00000380152	frameshift_variant	I/X	aTt/at	HIGH	deletion
BRCA2	chr13	32336311.0	Silent	p.=	ENST00000380152	synonymous_variant	S	tcT/tcC	LOW	SNV
BRCA2	chr13	32398216.0	Missense_Mutation	p.Ala3235Thr	ENST00000380152	missense_variant	A/T	Gcc/Acc	MODERATE	SNV
BRCA2	chr13	32336850.0	Missense_Mutation	p.Glu832Gly	ENST00000380152	missense_variant	E/G	gAg/gGg	MODERATE	SNV
BRCA2	chr13	32326597.0	Missense_Mutation	p.Ser205Arg	ENST00000380152	missense_variant	S/R	agT/agG	MODERATE	SNV
BRCA2	chr13	32338658.0	Missense_Mutation	p.Asn1435His	ENST00000380152	missense_variant	N/H	Aat/Cat	MODERATE	SNV
BRCA2	chr13	32325174.0	Missense_Mutation	p.Leu139Val	ENST00000380152	missense_variant	L/V	Ctt/Gtt	MODERATE	SNV
BRCA2	chr13	32398756.0	Frame_Shift_Del	p.Lys3416AsnfsTer11	ENST00000380152	frameshift_variant	K/X	Aaa/aa	HIGH	deletion
BRCA2	chr13	32333011.0	Silent	p.=	ENST00000380152	synonymous_variant	S	tcA/tcG	LOW	SNV
BRCA2	chr13	32319298.0	Nonsense_Mutation	p.Glu97Ter	ENST00000380152	stop_gained	E/*	Gaa/Taa	HIGH	SNV
BRCA2	chr13	32332319.0	Missense_Mutation	p.Asp281Tyr	ENST00000380152	missense_variant	D/Y	Gac/Tac	MODERATE	SNV
BRCA2	chr13	32332812.0	Missense_Mutation	p.Ser445Tyr	ENST00000380152	missense_variant	S/Y	tCt/tAt	MODERATE	SNV
BRCA2	chr13	32333316.0	Missense_Mutation	p.Leu613Arg	ENST00000380152	missense_variant	L/R	cTa/cGa	MODERATE	SNV
BRCA2	chr13	32337056.0	Missense_Mutation	p.Leu901Ile	ENST00000380152	missense_variant	L/I	Ctt/Att	MODERATE	SNV
BRCA2	chr13	32338409.0	Missense_Mutation	p.Asp1352Tyr	ENST00000380152	missense_variant	D/Y	Gat/Tat	MODERATE	SNV
BRCA2	chr13	32339627.0	Missense_Mutation	p.Asn1758His	ENST00000380152	missense_variant	N/H	Aat/Cat	MODERATE	SNV
BRCA2	chr13	32355260.0	Silent	p.=	ENST00000380152	synonymous_variant	T	acT/acG	LOW	SNV
BRCA2	chr13	32362621.0	Missense_Mutation	p.Glu2635Gly	ENST00000380152	missense_variant	E/G	gAa/gGa	MODERATE	SNV
BRCA2	chr13	32339277.0	Frame_Shift_Del	p.Asn1642MetfsTer2	ENST00000380152	frameshift_variant	E/X	gAa/ga	HIGH	deletion
BRCA2	chr13	32332271.0	Splice_Site		ENST00000380152	splice_acceptor_variant			HIGH	SNV
BRCA2	chr13	32336277.0	Missense_Mutation	p.Ser641Tyr	ENST00000380152	missense_variant	S/Y	tCt/tAt	MODERATE	SNV
BRCA2	chr13	32356551.0	Missense_Mutation	p.Arg2520Gln	ENST00000380152	missense_variant	R/Q	cGa/cAa	MODERATE	SNV
BRCA2	chr13	32379420.0	Missense_Mutation	p.Glu2953Ala	ENST00000380152	missense_variant	E/A	gAa/gCa	MODERATE	SNV
BRCA2	chr13	32338982.0	Frame_Shift_Del	p.Asn1544ThrfsTer24	ENST00000380152	frameshift_variant	K/X	Aaa/aa	HIGH	deletion
BRCA2	chr13	32363184.0	Missense_Mutation	p.Asp2661Val	ENST00000380152	missense_variant	D/V	gAt/gTt	MODERATE	SNV
BRCA2	chr13	32398401.0	Missense_Mutation	p.Lys3296Asn	ENST00000380152	missense_variant	K/N	aaG/aaT	MODERATE	SNV
BRCA2	chr13	32357919.0	Nonsense_Mutation	p.Glu2599Ter	ENST00000380152	stop_gained	E/*	Gaa/Taa	HIGH	SNV
BRCA2	chr13	32337305.0	Frame_Shift_Ins	p.Asn986LysfsTer2	ENST00000380152	frameshift_variant	E/EX	gaa/gAaa	HIGH	insertion
BRCA2	chr13	32339582.0	Missense_Mutation	p.Ser1743Arg	ENST00000380152	missense_variant	S/R	Agt/Cgt	MODERATE	SNV
BRCA2	chr13	32332474.0	Missense_Mutation	p.Ile332Met	ENST00000380152	missense_variant	I/M	atT/atG	MODERATE	SNV
BRCA2	chr13	32340828.0	Missense_Mutation	p.Phe2158Cys	ENST00000380152	missense_variant	F/C	tTt/tGt	MODERATE	SNV
BRCA2	chr13	32380142.0	Missense_Mutation	p.Thr3085Ala	ENST00000380152	missense_variant	T/A	Aca/Gca	MODERATE	SNV
BRCA2	chr13	32398569.0	Silent	p.=	ENST00000380152	synonymous_variant	L	ctT/ctG	LOW	SNV
BRCA2	chr13	32398452.0	Frame_Shift_Ins	p.Glu3316ArgfsTer11	ENST00000380152	frameshift_variant	-/X	-/A	HIGH	insertion
BRCA2	chr13	32326147.0	Missense_Mutation	p.Ser158Pro	ENST00000380152	missense_variant	S/P	Tca/Cca	MODERATE	SNV
BRCA2	chr13	32333199.0	Frame_Shift_Ins	p.Leu574PhefsTer21	ENST00000380152	frameshift_variant	L/FLKFGSX	ttg/ttTTTAAAGTTTGGATCAg	HIGH	insertion
BRCA2	chr13	32336517.0	In_Frame_Ins	p.Pro721_Lys722insGluArgLeu	ENST00000380152	inframe_insertion	P/PERL	cca/ccTGAGAGATTa	MODERATE	insertion
BRCA2	chr13	32379767.0	Missense_Mutation	p.Arg2991Cys	ENST00000380152	missense_variant	R/C	Cgt/Tgt	MODERATE	SNV
BRCA2	chr13	32338534.0	Silent	p.=	ENST00000380152	synonymous_variant	A	gcG/gcA	LOW	SNV
BRCA2	chr13	32336651.0	Missense_Mutation	p.Ala766Thr	ENST00000380152	missense_variant	A/T	Gcc/Acc	MODERATE	SNV
BRCA2	chr13	32397002.0	Silent	p.=	ENST00000380152	synonymous_variant	P	ccG/ccA	LOW	SNV
KIF26B	chr1	245702728.0	3'UTR		ENST00000407071	3_prime_UTR_variant			MODIFIER	SNV
KIF26B	chr1	245685820.0	Missense_Mutation	p.Pro946His	ENST00000407071	missense_variant	P/H	cCt/cAt	MODERATE	SNV
KIF26B	chr1	245646133.0	Missense_Mutation	p.Arg704His	ENST00000407071	missense_variant	R/H	cGc/cAc	MODERATE	SNV
KIF26B	chr1	245602664.0	Nonsense_Mutation	p.Gln480Ter	ENST00000407071	stop_gained	Q/*	Cag/Tag	HIGH	SNV
KIF26B	chr1	245686629.0	Missense_Mutation	p.Asp1216Asn	ENST00000407071	missense_variant	D/N	Gac/Aac	MODERATE	SNV
KIF26B	chr1	245156403.0	Missense_Mutation	p.Ala62Val	ENST00000407071	missense_variant	A/V	gCg/gTg	MODERATE	SNV
KIF26B	chr1	245684316.0	Missense_Mutation	p.Ala781Val	ENST00000407071	missense_variant	A/V	gCg/gTg	MODERATE	SNV
KIF26B	chr1	245602592.0	Missense_Mutation	p.Arg456Cys	ENST00000407071	missense_variant	R/C	Cgc/Tgc	MODERATE	SNV
KIF26B	chr1	245684246.0	Missense_Mutation	p.Ala758Thr	ENST00000407071	missense_variant	A/T	Gcc/Acc	MODERATE	SNV
KIF26B	chr1	245687991.0	Missense_Mutation	p.Gly1670Ser	ENST00000407071	missense_variant	G/S	Ggc/Agc	MODERATE	SNV
KIF26B	chr1	245688756.0	Missense_Mutation	p.Val1925Met	ENST00000407071	missense_variant	V/M	Gtg/Atg	MODERATE	SNV
KIF26B	chr1	245602681.0	Missense_Mutation	p.Asp485Glu	ENST00000407071	missense_variant	D/E	gaT/gaG	MODERATE	SNV
KIF26B	chr1	245686801.0	Missense_Mutation	p.Ser1273Ile	ENST00000407071	missense_variant	S/I	aGc/aTc	MODERATE	SNV
KIF26B	chr1	245687250.0	Missense_Mutation	p.Ser1423Thr	ENST00000407071	missense_variant	S/T	Tcc/Acc	MODERATE	SNV
KIF26B	chr1	245698946.0	Silent	p.=	ENST00000407071	synonymous_variant	A	gcC/gcT	LOW	SNV
KIF26B	chr1	245686280.0	Silent	p.=	ENST00000407071	synonymous_variant	P	ccG/ccA	LOW	SNV
KIF26B	chr1	245684301.0	Missense_Mutation	p.Ala776Val	ENST00000407071	missense_variant	A/V	gCg/gTg	MODERATE	SNV
KIF26B	chr1	245698189.0	Missense_Mutation	p.Arg1970Cys	ENST00000407071	missense_variant	R/C	Cgc/Tgc	MODERATE	SNV
KIF26B	chr1	245686324.0	Missense_Mutation	p.Ala1114Val	ENST00000407071	missense_variant	A/V	gCg/gTg	MODERATE	SNV
KIF26B	chr1	245687453.0	Silent	p.=	ENST00000407071	synonymous_variant	L	ctC/ctT	LOW	SNV
KIF26B	chr1	245688741.0	Missense_Mutation	p.Glu1920Lys	ENST00000407071	missense_variant	E/K	Gag/Aag	MODERATE	SNV
KIF26B	chr1	245684277.0	Missense_Mutation	p.Met768Thr	ENST00000407071	missense_variant	M/T	aTg/aCg	MODERATE	SNV
KIF26B	chr1	245686595.0	Silent	p.=	ENST00000407071	synonymous_variant	S	agC/agT	LOW	SNV
KIF26B	chr1	245687187.0	Missense_Mutation	p.Arg1402Trp	ENST00000407071	missense_variant	R/W	Cgg/Tgg	MODERATE	SNV
KIF26B	chr1	245366909.0	Missense_Mutation	p.Asp181Asn	ENST00000407071	missense_variant	D/N	Gac/Aac	MODERATE	SNV
KIF26B	chr1	245511111.0	Intron		ENST00000407071	intron_variant			MODIFIER	SNV
KIF26B	chr1	245685791.0	Silent	p.=	ENST00000407071	synonymous_variant	I	atC/atT	LOW	SNV
KIF26B	chr1	245698923.0	Missense_Mutation	p.Glu2022Lys	ENST00000407071	missense_variant	E/K	Gaa/Aaa	MODERATE	SNV
KIF26B	chr1	245685893.0	Silent	p.=	ENST00000407071	synonymous_variant	G	ggG/ggA	LOW	SNV
KIF26B	chr1	245367129.0	Missense_Mutation	p.Thr254Ile	ENST00000407071	missense_variant	T/I	aCc/aTc	MODERATE	SNV
KIF26B	chr1	245611836.0	Missense_Mutation	p.Ala653Val	ENST00000407071	missense_variant	A/V	gCt/gTt	MODERATE	SNV
KIF26B	chr1	245686462.0	Missense_Mutation	p.Thr1160Ile	ENST00000407071	missense_variant	T/I	aCt/aTt	MODERATE	SNV
KIF26B	chr1	245367116.0	Missense_Mutation	p.Ala250Thr	ENST00000407071	missense_variant	A/T	Gcc/Acc	MODERATE	SNV
KIF26B	chr1	245688480.0	Frame_Shift_Del	p.Ala1835ProfsTer41	ENST00000407071	frameshift_variant	G/X	Ggg/gg	HIGH	deletion
KIF26B	chr1	245688072.0	Missense_Mutation	p.Ala1697Thr	ENST00000407071	missense_variant	A/T	Gcg/Acg	MODERATE	SNV
KIF26B	chr1	245366996.0	Missense_Mutation	p.Gly210Ser	ENST00000407071	missense_variant	G/S	Ggc/Agc	MODERATE	SNV
KIF26B	chr1	245685539.0	Silent	p.=	ENST00000407071	synonymous_variant	P	ccC/ccT	LOW	SNV
KIF26B	chr1	245685800.0	Silent	p.=	ENST00000407071	synonymous_variant	S	agC/agT	LOW	SNV
KIF26B	chr1	245540827.0	Silent	p.=	ENST00000407071	synonymous_variant	S	tcC/tcT	LOW	SNV
KIF26B	chr1	245540937.0	Missense_Mutation	p.Pro446Leu	ENST00000407071	missense_variant	P/L	cCg/cTg	MODERATE	SNV
KIF26B	chr1	245686083.0	Missense_Mutation	p.Ala1034Thr	ENST00000407071	missense_variant	A/T	Gcc/Acc	MODERATE	SNV
KIF26B	chr1	245688771.0	Missense_Mutation	p.Arg1930Trp	ENST00000407071	missense_variant	R/W	Cgg/Tgg	MODERATE	SNV
KIF26B	chr1	245685790.0	Missense_Mutation	p.Ile936Thr	ENST00000407071	missense_variant	I/T	aTc/aCc	MODERATE	SNV
KIF26B	chr1	245685962.0	Silent	p.=	ENST00000407071	synonymous_variant	G	ggC/ggT	LOW	SNV
KIF26B	chr1	245687148.0	Missense_Mutation	p.Thr1389Ala	ENST00000407071	missense_variant	T/A	Acc/Gcc	MODERATE	SNV
KIF26B	chr1	245698965.0	Missense_Mutation	p.Glu2036Lys	ENST00000407071	missense_variant	E/K	Gag/Aag	MODERATE	SNV
KIF26B	chr1	245702642.0	3'UTR		ENST00000407071	3_prime_UTR_variant			MODIFIER	SNV
KIF26B	chr1	245686725.0	Missense_Mutation	p.Val1248Ile	ENST00000407071	missense_variant	V/I	Gtc/Atc	MODERATE	SNV
KIF26B	chr1	245702583.0	Missense_Mutation	p.Asp2102Asn	ENST00000407071	missense_variant	D/N	Gac/Aac	MODERATE	SNV
KIF26B	chr1	245686177.0	Frame_Shift_Del	p.Arg1067GlyfsTer65	ENST00000407071	frameshift_variant	S/X	tCc/tc	HIGH	deletion
KIF26B	chr1	245367074.0	Missense_Mutation	p.Val236Met	ENST00000407071	missense_variant	V/M	Gtg/Atg	MODERATE	SNV
KIF26B	chr1	245602753.0	Silent	p.=	ENST00000407071	synonymous_variant	F	ttC/ttT	LOW	SNV
KIF26B	chr1	245686307.0	Silent	p.=	ENST00000407071	synonymous_variant	S	agC/agT	LOW	SNV
KIF26B	chr1	245687696.0	Silent	p.=	ENST00000407071	synonymous_variant	P	ccG/ccA	LOW	SNV
KIF26B	chr1	245540810.0	Missense_Mutation	p.Arg404Trp	ENST00000407071	missense_variant	R/W	Cgg/Tgg	MODERATE	SNV
KIF26B	chr1	245609314.0	Missense_Mutation	p.Gly567Asp	ENST00000407071	missense_variant	G/D	gGc/gAc	MODERATE	SNV
KIF26B	chr1	245611888.0	Missense_Mutation	p.Asp670Glu	ENST00000407071	missense_variant	D/E	gaC/gaA	MODERATE	SNV
KIF26B	chr1	245698958.0	Silent	p.=	ENST00000407071	synonymous_variant	A	gcG/gcA	LOW	SNV
KIF26B	chr1	245646258.0	Frame_Shift_Ins	p.Gly746GlufsTer98	ENST00000407071	frameshift_variant	G/EMX	ggc/gAGATgc	HIGH	insertion
KIF26B	chr1	245686015.0	Missense_Mutation	p.Ala1011Val	ENST00000407071	missense_variant	A/V	gCg/gTg	MODERATE	SNV
KIF26B	chr1	245156406.0	Missense_Mutation	p.Leu63Arg	ENST00000407071	missense_variant	L/R	cTc/cGc	MODERATE	SNV
CELSR1	chr22	46410526.0	Frame_Shift_Del	p.Gly1602ValfsTer104	ENST00000262738	frameshift_variant	G/X	gGt/gt	HIGH	deletion
CELSR1	chr22	46535283.0	Missense_Mutation	p.Phe630Leu	ENST00000262738	missense_variant	F/L	Ttc/Ctc	MODERATE	SNV
CELSR1	chr22	46536089.0	Missense_Mutation	p.Arg361His	ENST00000262738	missense_variant	R/H	cGc/cAc	MODERATE	SNV
CELSR1	chr22	46377183.0	Missense_Mutation	p.Val2488Ile	ENST00000262738	missense_variant	V/I	Gtc/Atc	MODERATE	SNV
CELSR1	chr22	46439326.0	Silent	p.=	ENST00000262738	synonymous_variant	I	atC/atT	LOW	SNV
CELSR1	chr22	46397819.0	Silent	p.=	ENST00000262738	synonymous_variant	N	aaC/aaT	LOW	SNV
CELSR1	chr22	46366431.0	Missense_Mutation	p.Arg2752His	ENST00000262738	missense_variant	R/H	cGc/cAc	MODERATE	SNV
CELSR1	chr22	46535025.0	Missense_Mutation	p.Ala716Thr	ENST00000262738	missense_variant	A/T	Gcc/Acc	MODERATE	SNV
CELSR1	chr22	46533774.0	Missense_Mutation	p.Asp1133Asn	ENST00000262738	missense_variant	D/N	Gac/Aac	MODERATE	SNV
CELSR1	chr22	46398623.0	Silent	p.=	ENST00000262738	synonymous_variant	I	atC/atT	LOW	SNV
CELSR1	chr22	46364115.0	Silent	p.=	ENST00000262738	synonymous_variant	G	ggC/ggT	LOW	SNV
CELSR1	chr22	46534678.0	Silent	p.=	ENST00000262738	synonymous_variant	P	ccC/ccA	LOW	SNV
CELSR1	chr22	46364634.0	Missense_Mutation	p.Thr2886Asn	ENST00000262738	missense_variant	T/N	aCc/aAc	MODERATE	SNV
CELSR1	chr22	46535330.0	Frame_Shift_Del	p.Gly614AlafsTer54	ENST00000262738	frameshift_variant	G/X	gGc/gc	HIGH	deletion
CELSR1	chr22	46439332.0	Silent	p.=	ENST00000262738	synonymous_variant	L	ctG/ctT	LOW	SNV
CELSR1	chr22	46535576.0	Missense_Mutation	p.Leu532Pro	ENST00000262738	missense_variant	L/P	cTg/cCg	MODERATE	SNV
CELSR1	chr22	46436245.0	Missense_Mutation	p.Arg1484His	ENST00000262738	missense_variant	R/H	cGc/cAc	MODERATE	SNV
CELSR1	chr22	46534447.0	Silent	p.=	ENST00000262738	synonymous_variant	S	tcG/tcA	LOW	SNV
CELSR1	chr22	46372972.0	Missense_Mutation	p.Tyr2557Cys	ENST00000262738	missense_variant	Y/C	tAc/tGc	MODERATE	SNV
CELSR1	chr22	46535864.0	Missense_Mutation	p.Pro436Leu	ENST00000262738	missense_variant	P/L	cCg/cTg	MODERATE	SNV
CELSR1	chr22	46533898.0	Silent	p.=	ENST00000262738	synonymous_variant	L	ctC/ctT	LOW	SNV
CELSR1	chr22	46397831.0	Frame_Shift_Del	p.Thr1849ArgfsTer8	ENST00000262738	frameshift_variant	G/X	ggG/gg	HIGH	deletion
CELSR1	chr22	46533969.0	Missense_Mutation	p.Arg1068Trp	ENST00000262738	missense_variant	R/W	Cgg/Tgg	MODERATE	SNV
CELSR1	chr22	46534774.0	Silent	p.=	ENST00000262738	synonymous_variant	S	agT/agC	LOW	SNV
CELSR1	chr22	46391250.0	Silent	p.=	ENST00000262738	synonymous_variant	G	ggC/ggT	LOW	SNV
CELSR1	chr22	46384603.0	Frame_Shift_Ins	p.Arg2275GlnfsTer18	ENST00000262738	frameshift_variant	-/X	-/C	HIGH	insertion
CELSR1	chr22	46535468.0	Missense_Mutation	p.Ser568Ile	ENST00000262738	missense_variant	S/I	aGc/aTc	MODERATE	SNV
CELSR1	chr22	46364152.0	Missense_Mutation	p.Ser2960Asn	ENST00000262738	missense_variant	S/N	aGc/aAc	MODERATE	SNV
CELSR1	chr22	46377203.0	Missense_Mutation	p.Ala2481Val	ENST00000262738	missense_variant	A/V	gCa/gTa	MODERATE	SNV
CELSR1	chr22	46397828.0	Silent	p.=	ENST00000262738	synonymous_variant	T	acG/acT	LOW	SNV
CELSR1	chr22	46464109.0	Missense_Mutation	p.Thr1261Ala	ENST00000262738	missense_variant	T/A	Acc/Gcc	MODERATE	SNV
CELSR1	chr22	46536173.0	Missense_Mutation	p.Arg333His	ENST00000262738	missense_variant	R/H	cGc/cAc	MODERATE	SNV
CELSR1	chr22	46365234.0	Nonsense_Mutation	p.Lys2851Ter	ENST00000262738	stop_gained	K/*	Aaa/Taa	HIGH	SNV
CELSR1	chr22	46381907.0	Missense_Mutation	p.Ile2343Val	ENST00000262738	missense_variant	I/V	Att/Gtt	MODERATE	SNV
CELSR1	chr22	46464062.0	Silent	p.=	ENST00000262738	synonymous_variant	P	ccG/ccA	LOW	SNV
CELSR1	chr22	46535026.0	Silent	p.=	ENST00000262738	synonymous_variant	D	gaC/gaT	LOW	SNV
CELSR1	chr22	46373016.0	Silent	p.=	ENST00000262738	synonymous_variant	Y	taC/taT	LOW	SNV
CELSR1	chr22	46389385.0	Missense_Mutation	p.Arg2154Cys	ENST00000262738	missense_variant	R/C	Cgc/Tgc	MODERATE	SNV
CELSR1	chr22	46369187.0	Frame_Shift_Del	p.Ile2650SerfsTer5	ENST00000262738	frameshift_variant	K/X	aaA/aa	HIGH	deletion
CELSR1	chr22	46536174.0	Missense_Mutation	p.Arg333Cys	ENST00000262738	missense_variant	R/C	Cgc/Tgc	MODERATE	SNV
CELSR1	chr22	46411633.0	Missense_Mutation	p.Ala1580Thr	ENST00000262738	missense_variant	A/T	Gct/Act	MODERATE	SNV
CELSR1	chr22	46369691.0	Splice_Site		ENST00000262738	splice_donor_variant			HIGH	SNV
CELSR1	chr22	46533978.0	Nonsense_Mutation	p.Glu1065Ter	ENST00000262738	stop_gained	E/*	Gag/Tag	HIGH	SNV
CELSR1	chr22	46534164.0	Missense_Mutation	p.Glu1003Lys	ENST00000262738	missense_variant	E/K	Gaa/Aaa	MODERATE	SNV
CELSR1	chr22	46534558.0	Missense_Mutation	p.Gln871His	ENST00000262738	missense_variant	Q/H	caG/caT	MODERATE	SNV
CELSR1	chr22	46369746.0	Silent	p.=	ENST00000262738	synonymous_variant	S	tcG/tcA	LOW	SNV
CELSR1	chr22	46535531.0	Missense_Mutation	p.Ser547Tyr	ENST00000262738	missense_variant	S/Y	tCt/tAt	MODERATE	SNV
CELSR1	chr22	46389411.0	Missense_Mutation	p.Thr2145Met	ENST00000262738	missense_variant	T/M	aCg/aTg	MODERATE	SNV
CELSR1	chr22	46439387.0	Missense_Mutation	p.Arg1403His	ENST00000262738	missense_variant	R/H	cGc/cAc	MODERATE	SNV
CELSR1	chr22	46378611.0	Missense_Mutation	p.Met2455Val	ENST00000262738	missense_variant	M/V	Atg/Gtg	MODERATE	SNV
CELSR1	chr22	46390466.0	Missense_Mutation	p.Ser2091Gly	ENST00000262738	missense_variant	S/G	Agc/Ggc	MODERATE	SNV
CELSR1	chr22	46382032.0	Missense_Mutation	p.Pro2301Leu	ENST00000262738	missense_variant	P/L	cCg/cTg	MODERATE	SNV
CELSR1	chr22	46439272.0	Missense_Mutation	p.Glu1441Asp	ENST00000262738	missense_variant	E/D	gaG/gaT	MODERATE	SNV
CELSR1	chr22	46534852.0	Silent	p.=	ENST00000262738	synonymous_variant	A	gcG/gcA	LOW	SNV
CELSR1	chr22	46364139.0	Silent	p.=	ENST00000262738	synonymous_variant	S	tcG/tcA	LOW	SNV
CELSR1	chr22	46389474.0	Missense_Mutation	p.Thr2124Met	ENST00000262738	missense_variant	T/M	aCg/aTg	MODERATE	SNV
CELSR1	chr22	46536103.0	Silent	p.=	ENST00000262738	synonymous_variant	S	tcG/tcA	LOW	SNV
TG	chr8	132887353.0	Missense_Mutation	p.Asp661Tyr	ENST00000220616	missense_variant	D/Y	Gac/Tac	MODERATE	SNV
TG	chr8	132906718.0	Missense_Mutation	p.Ser1222Leu	ENST00000220616	missense_variant	S/L	tCg/tTg	MODERATE	SNV
TG	chr8	132967961.0	Missense_Mutation	p.Arg1952Trp	ENST00000220616	missense_variant	R/W	Cgg/Tgg	MODERATE	SNV
TG	chr8	132887522.0	Missense_Mutation	p.Arg717Gln	ENST00000220616	missense_variant	R/Q	cGa/cAa	MODERATE	SNV
TG	chr8	132967831.0	Silent	p.=	ENST00000220616	synonymous_variant	E	gaG/gaA	LOW	SNV
TG	chr8	132966676.0	Missense_Mutation	p.Ala1889Thr	ENST00000220616	missense_variant	A/T	Gca/Aca	MODERATE	SNV
TG	chr8	132873085.0	Missense_Mutation	p.Asn168His	ENST00000220616	missense_variant	N/H	Aat/Cat	MODERATE	SNV
TG	chr8	132933669.0	Missense_Mutation	p.Ser1642Phe	ENST00000220616	missense_variant	S/F	tCt/tTt	MODERATE	SNV
TG	chr8	132933606.0	Missense_Mutation	p.Thr1621Met	ENST00000220616	missense_variant	T/M	aCg/aTg	MODERATE	SNV
TG	chr8	132948774.0	Splice_Site		ENST00000220616	splice_acceptor_variant			HIGH	SNV
TG	chr8	132933574.0	Silent	p.=	ENST00000220616	synonymous_variant	D	gaC/gaT	LOW	SNV
TG	chr8	132969563.0	Missense_Mutation	p.Ser1990Tyr	ENST00000220616	missense_variant	S/Y	tCt/tAt	MODERATE	SNV
TG	chr8	132972738.0	Missense_Mutation	p.Pro2066Ser	ENST00000220616	missense_variant	P/S	Ccc/Tcc	MODERATE	SNV
TG	chr8	132868189.0	Missense_Mutation	p.Tyr48Asp	ENST00000220616	missense_variant	Y/D	Tac/Gac	MODERATE	SNV
TG	chr8	132967826.0	Missense_Mutation	p.Ala1907Thr	ENST00000220616	missense_variant	A/T	Gca/Aca	MODERATE	SNV
TG	chr8	133096267.0	Missense_Mutation	p.Arg2489His	ENST00000220616	missense_variant	R/H	cGt/cAt	MODERATE	SNV
TG	chr8	133022060.0	Missense_Mutation	p.Ala2316Thr	ENST00000220616	missense_variant	A/T	Gct/Act	MODERATE	SNV
TG	chr8	133113569.0	Missense_Mutation	p.Ala2574Thr	ENST00000220616	missense_variant	A/T	Gcc/Acc	MODERATE	SNV
TG	chr8	132886886.0	Missense_Mutation	p.Gly505Asp	ENST00000220616	missense_variant	G/D	gGt/gAt	MODERATE	SNV
TG	chr8	132887251.0	Frame_Shift_Ins	p.Glu627AlafsTer37	ENST00000220616	frameshift_variant	E/AX	gag/gCag	HIGH	insertion
TG	chr8	132886818.0	Missense_Mutation	p.Gln482His	ENST00000220616	missense_variant	Q/H	caG/caT	MODERATE	SNV
TG	chr8	132886640.0	Missense_Mutation	p.Arg423His	ENST00000220616	missense_variant	R/H	cGc/cAc	MODERATE	SNV
TG	chr8	132887279.0	Missense_Mutation	p.Cys636Phe	ENST00000220616	missense_variant	C/F	tGc/tTc	MODERATE	SNV
TG	chr8	133095129.0	Missense_Mutation	p.Cys2442Phe	ENST00000220616	missense_variant	C/F	tGc/tTc	MODERATE	SNV
TG	chr8	133133520.0	Frame_Shift_Del	p.Trp2685GlyfsTer26	ENST00000220616	frameshift_variant	T/X	aCc/ac	HIGH	deletion
TG	chr8	132941511.0	Silent	p.=	ENST00000220616	synonymous_variant	C	tgC/tgT	LOW	SNV
TG	chr8	133022052.0	Missense_Mutation	p.Gly2313Val	ENST00000220616	missense_variant	G/V	gGa/gTa	MODERATE	SNV
TG	chr8	132935765.0	Missense_Mutation	p.Ala1648Thr	ENST00000220616	missense_variant	A/T	Gca/Aca	MODERATE	SNV
TG	chr8	133022101.0	Silent	p.=	ENST00000220616	synonymous_variant	I	atC/atT	LOW	SNV
TG	chr8	133134716.0	Frame_Shift_Del	p.Glu2744ValfsTer20	ENST00000220616	frameshift_variant	EE/EX	gaGGag/gaag	HIGH	deletion
TG	chr8	132882610.0	Missense_Mutation	p.Arg296Gln	ENST00000220616	missense_variant;splice_region_variant	R/Q	cGa/cAa	MODERATE	SNV
TG	chr8	132901473.0	Missense_Mutation	p.Gln1185Arg	ENST00000220616	missense_variant	Q/R	cAg/cGg	MODERATE	SNV
TG	chr8	133013756.0	Missense_Mutation	p.Arg2185Gln	ENST00000220616	missense_variant	R/Q	cGg/cAg	MODERATE	SNV
TG	chr8	132871454.0	Silent	p.=	ENST00000220616	synonymous_variant	A	gcG/gcA	LOW	SNV
TG	chr8	132886545.0	Silent	p.=	ENST00000220616	synonymous_variant	S	tcC/tcT	LOW	SNV
TG	chr8	132886735.0	Missense_Mutation	p.Arg455Cys	ENST00000220616	missense_variant	R/C	Cgt/Tgt	MODERATE	SNV
TG	chr8	133095070.0	Silent	p.=	ENST00000220616	synonymous_variant	A	gcC/gcT	LOW	SNV
TG	chr8	132871453.0	Missense_Mutation	p.Ala127Val	ENST00000220616	missense_variant	A/V	gCg/gTg	MODERATE	SNV
TG	chr8	132882980.0	Frame_Shift_Ins	p.Glu354GlyfsTer7	ENST00000220616	frameshift_variant	-/X	-/G	HIGH	insertion
TG	chr8	132871350.0	Missense_Mutation	p.Leu93Met	ENST00000220616	missense_variant;splice_region_variant	L/M	Ctg/Atg	MODERATE	SNV
TG	chr8	132887127.0	Silent	p.=	ENST00000220616	synonymous_variant	I	atC/atT	LOW	SNV
TG	chr8	133047815.0	Intron		ENST00000220616	intron_variant			MODIFIER	SNV
TG	chr8	132886982.0	Missense_Mutation	p.Ala537Val	ENST00000220616	missense_variant	A/V	gCt/gTt	MODERATE	SNV
TG	chr8	132913088.0	Missense_Mutation	p.Asp1401Tyr	ENST00000220616	missense_variant	D/Y	Gat/Tat	MODERATE	SNV
TG	chr8	133047570.0	Intron		ENST00000220616	intron_variant			MODIFIER	SNV
TG	chr8	133029921.0	Silent	p.=	ENST00000220616	synonymous_variant	R	cgC/cgT	LOW	SNV
TG	chr8	132898892.0	Silent	p.=	ENST00000220616	synonymous_variant	F	ttC/ttT	LOW	SNV
TG	chr8	132972702.0	Missense_Mutation	p.Glu2054Gln	ENST00000220616	missense_variant	E/Q	Gaa/Caa	MODERATE	SNV
TG	chr8	132882949.0	Frame_Shift_Ins	p.Gln342HisfsTer19	ENST00000220616	frameshift_variant	Q/HX	cag/caTg	HIGH	insertion
TG	chr8	132888027.0	Silent	p.=	ENST00000220616	synonymous_variant	R	agG/agA	LOW	SNV
TG	chr8	132898866.0	Nonsense_Mutation	p.Glu1096Ter	ENST00000220616	stop_gained	E/*	Gaa/Taa	HIGH	SNV
TG	chr8	132900275.0	Silent	p.=	ENST00000220616	synonymous_variant	G	ggC/ggA	LOW	SNV
TG	chr8	133096313.0	Silent	p.=	ENST00000220616	synonymous_variant	V	gtC/gtT	LOW	SNV
TG	chr8	132888433.0	Missense_Mutation	p.Leu876Ile	ENST00000220616	missense_variant	L/I	Ctc/Atc	MODERATE	SNV
TG	chr8	132882570.0	Frame_Shift_Ins	p.Arg283LeufsTer22	ENST00000220616	frameshift_variant	R/LSEX	cgg/cTTTCAGAgg	HIGH	insertion
TG	chr8	132882572.0	Silent	p.=	ENST00000220616	synonymous_variant	R	cgG/cgA	LOW	SNV
TG	chr8	132929174.0	Missense_Mutation	p.Val1600Met	ENST00000220616	missense_variant	V/M	Gtg/Atg	MODERATE	SNV
TG	chr8	132888075.0	Silent	p.=	ENST00000220616	synonymous_variant	S	tcC/tcT	LOW	SNV
TG	chr8	133116687.0	Silent	p.=	ENST00000220616	synonymous_variant	Y	taC/taT	LOW	SNV
RP1L1	chr8	10607371.0	Frame_Shift_Ins	p.Gly2243ArgfsTer6	ENST00000382483	frameshift_variant	-/X	-/A	HIGH	insertion
RP1L1	chr8	10610800.0	Missense_Mutation	p.Val1100Met	ENST00000382483	missense_variant	V/M	Gtg/Atg	MODERATE	SNV
RP1L1	chr8	10622990.0	Missense_Mutation	p.Arg71His	ENST00000382483	missense_variant	R/H	cGc/cAc	MODERATE	SNV
RP1L1	chr8	10612588.0	Missense_Mutation	p.Gly504Ser	ENST00000382483	missense_variant	G/S	Ggc/Agc	MODERATE	SNV
RP1L1	chr8	10609267.0	Missense_Mutation	p.Arg1611Trp	ENST00000382483	missense_variant	R/W	Cgg/Tgg	MODERATE	SNV
RP1L1	chr8	10611393.0	Missense_Mutation	p.Gly902Asp	ENST00000382483	missense_variant	G/D	gGc/gAc	MODERATE	SNV
RP1L1	chr8	10613199.0	Missense_Mutation	p.Ser300Leu	ENST00000382483	missense_variant	S/L	tCg/tTg	MODERATE	SNV
RP1L1	chr8	10612957.0	Frame_Shift_Del	p.Val381CysfsTer109	ENST00000382483	frameshift_variant	V/X	Gtg/tg	HIGH	deletion
RP1L1	chr8	10611594.0	Missense_Mutation	p.Gln835Arg	ENST00000382483	missense_variant	Q/R	cAa/cGa	MODERATE	SNV
RP1L1	chr8	10612621.0	Missense_Mutation	p.Arg493Trp	ENST00000382483	missense_variant	R/W	Cgg/Tgg	MODERATE	SNV
RP1L1	chr8	10609963.0	Nonsense_Mutation	p.Glu1379Ter	ENST00000382483	stop_gained	E/*	Gaa/Taa	HIGH	SNV
RP1L1	chr8	10610040.0	In_Frame_Del	p.Glu1353del	ENST00000382483	inframe_deletion	EE/E	gaAGAg/gag	MODERATE	deletion
RP1L1	chr8	10612892.0	Silent	p.=	ENST00000382483	synonymous_variant	G	ggG/ggT	LOW	SNV
RP1L1	chr8	10623104.0	Missense_Mutation	p.Ala33Asp	ENST00000382483	missense_variant	A/D	gCc/gAc	MODERATE	SNV
RP1L1	chr8	10610628.0	Missense_Mutation	p.Leu1157Arg	ENST00000382483	missense_variant	L/R	cTg/cGg	MODERATE	SNV
RP1L1	chr8	10613077.0	Missense_Mutation	p.Arg341Trp	ENST00000382483	missense_variant	R/W	Cgg/Tgg	MODERATE	SNV
RP1L1	chr8	10610051.0	Silent	p.=	ENST00000382483	synonymous_variant	Q	caG/caA	LOW	SNV
RP1L1	chr8	10612216.0	Missense_Mutation	p.Pro628Ser	ENST00000382483	missense_variant	P/S	Cct/Tct	MODERATE	SNV
RP1L1	chr8	10609570.0	Missense_Mutation	p.Ala1510Thr	ENST00000382483	missense_variant	A/T	Gcg/Acg	MODERATE	SNV
RP1L1	chr8	10623011.0	Missense_Mutation	p.Leu64Pro	ENST00000382483	missense_variant	L/P	cTc/cCc	MODERATE	SNV
RP1L1	chr8	10607924.0	Silent	p.=	ENST00000382483	synonymous_variant	P	ccG/ccA	LOW	SNV
RP1L1	chr8	10608684.0	Missense_Mutation	p.Gly1805Asp	ENST00000382483	missense_variant	G/D	gGt/gAt	MODERATE	SNV
RP1L1	chr8	10612540.0	Missense_Mutation	p.Arg520Cys	ENST00000382483	missense_variant	R/C	Cgc/Tgc	MODERATE	SNV
RP1L1	chr8	10611234.0	Missense_Mutation	p.Ala955Asp	ENST00000382483	missense_variant	A/D	gCt/gAt	MODERATE	SNV
RP1L1	chr8	10607486.0	Missense_Mutation	p.Glu2204Asp	ENST00000382483	missense_variant	E/D	gaG/gaT	MODERATE	SNV
RP1L1	chr8	10611133.0	Missense_Mutation	p.Gly989Cys	ENST00000382483	missense_variant	G/C	Ggc/Tgc	MODERATE	SNV
RP1L1	chr8	10607269.0	Missense_Mutation	p.Pro2277Ser	ENST00000382483	missense_variant	P/S	Ccc/Tcc	MODERATE	SNV
RP1L1	chr8	10608911.0	Silent	p.=	ENST00000382483	synonymous_variant	G	ggG/ggT	LOW	SNV
RP1L1	chr8	10607268.0	Missense_Mutation	p.Pro2277His	ENST00000382483	missense_variant	P/H	cCc/cAc	MODERATE	SNV
RP1L1	chr8	10607078.0	Silent	p.=	ENST00000382483	synonymous_variant	A	gcC/gcT	LOW	SNV
RP1L1	chr8	10612397.0	Silent	p.=	ENST00000382483	synonymous_variant	E	gaG/gaA	LOW	SNV
RP1L1	chr8	10613132.0	Silent	p.=	ENST00000382483	synonymous_variant	S	tcC/tcT	LOW	SNV
RP1L1	chr8	10613100.0	Missense_Mutation	p.Gly333Asp	ENST00000382483	missense_variant	G/D	gGc/gAc	MODERATE	SNV
RP1L1	chr8	10612543.0	Missense_Mutation	p.Gly519Ser	ENST00000382483	missense_variant	G/S	Ggc/Agc	MODERATE	SNV
RP1L1	chr8	10607528.0	Silent	p.=	ENST00000382483	synonymous_variant	Q	caG/caA	LOW	SNV
RP1L1	chr8	10612770.0	Missense_Mutation	p.Ala443Val	ENST00000382483	missense_variant	A/V	gCc/gTc	MODERATE	SNV
RP1L1	chr8	10613192.0	Silent	p.=	ENST00000382483	synonymous_variant	P	ccG/ccA	LOW	SNV
RP1L1	chr8	10623109.0	Silent	p.=	ENST00000382483	synonymous_variant	T	acG/acA	LOW	SNV
RP1L1	chr8	10622917.0	Silent	p.=	ENST00000382483	synonymous_variant	Q	caG/caA	LOW	SNV
RP1L1	chr8	10623054.0	Missense_Mutation	p.Arg50Cys	ENST00000382483	missense_variant	R/C	Cgc/Tgc	MODERATE	SNV
RP1L1	chr8	10612800.0	Missense_Mutation	p.Arg433His	ENST00000382483	missense_variant	R/H	cGc/cAc	MODERATE	SNV
RP1L1	chr8	10606792.0	3'UTR		ENST00000382483	3_prime_UTR_variant			MODIFIER	SNV
RP1L1	chr8	10610296.0	Missense_Mutation	p.Ala1268Thr	ENST00000382483	missense_variant	A/T	Gct/Act	MODERATE	SNV
RP1L1	chr8	10607153.0	Silent	p.=	ENST00000382483	synonymous_variant	E	gaA/gaG	LOW	SNV
RP1L1	chr8	10610036.0	Silent	p.=	ENST00000382483	synonymous_variant	A	gcG/gcA	LOW	SNV
RP1L1	chr8	10612871.0	Silent	p.=	ENST00000382483	synonymous_variant	T	acG/acA	LOW	SNV
RP1L1	chr8	10612500.0	Missense_Mutation	p.Ser533Leu	ENST00000382483	missense_variant	S/L	tCg/tTg	MODERATE	SNV
RP1L1	chr8	10613180.0	Silent	p.=	ENST00000382483	synonymous_variant	G	ggC/ggT	LOW	SNV
RP1L1	chr8	10610301.0	Missense_Mutation	p.Ala1266Val	ENST00000382483	missense_variant	A/V	gCc/gTc	MODERATE	SNV
RP1L1	chr8	10611342.0	Missense_Mutation	p.Ser919Phe	ENST00000382483	missense_variant	S/F	tCt/tTt	MODERATE	SNV
RP1L1	chr8	10612459.0	Missense_Mutation	p.Glu547Lys	ENST00000382483	missense_variant	E/K	Gaa/Aaa	MODERATE	SNV
RP1L1	chr8	10612666.0	Missense_Mutation	p.Asp478Tyr	ENST00000382483	missense_variant	D/Y	Gac/Tac	MODERATE	SNV
RP1L1	chr8	10609506.0	Missense_Mutation	p.Leu1531Pro	ENST00000382483	missense_variant	L/P	cTg/cCg	MODERATE	SNV
RP1L1	chr8	10609569.0	Missense_Mutation	p.Ala1510Val	ENST00000382483	missense_variant	A/V	gCg/gTg	MODERATE	SNV
RP1L1	chr8	10612801.0	Missense_Mutation	p.Arg433Cys	ENST00000382483	missense_variant	R/C	Cgc/Tgc	MODERATE	SNV
RP1L1	chr8	10608350.0	Silent	p.=	ENST00000382483	synonymous_variant	Q	caG/caA	LOW	SNV
RP1L1	chr8	10610974.0	Missense_Mutation	p.Val1042Phe	ENST00000382483	missense_variant	V/F	Gtc/Ttc	MODERATE	SNV
RP1L1	chr8	10611435.0	Missense_Mutation	p.Pro888Leu	ENST00000382483	missense_variant	P/L	cCg/cTg	MODERATE	SNV
RP1L1	chr8	10611115.0	Missense_Mutation	p.Gly995Arg	ENST00000382483	missense_variant	G/R	Ggg/Agg	MODERATE	SNV
MKI67	chr10	128115231.0	Missense_Mutation	p.Arg393Gly	ENST00000368654	missense_variant	R/G	Agg/Ggg	MODERATE	SNV
MKI67	chr10	128104476.0	Missense_Mutation	p.Thr2455Asn	ENST00000368654	missense_variant	T/N	aCt/aAt	MODERATE	SNV
MKI67	chr10	128103572.0	Silent	p.=	ENST00000368654	synonymous_variant	P	ccA/ccC	LOW	SNV
MKI67	chr10	128099114.0	3'UTR		ENST00000368654	3_prime_UTR_variant			MODIFIER	SNV
MKI67	chr10	128107886.0	Silent	p.=	ENST00000368654	synonymous_variant	Q	caG/caA	LOW	SNV
MKI67	chr10	128108037.0	Missense_Mutation	p.Arg1268Gln	ENST00000368654	missense_variant	R/Q	cGa/cAa	MODERATE	SNV
MKI67	chr10	128115078.0	Missense_Mutation	p.Phe444Val	ENST00000368654	missense_variant	F/V	Ttt/Gtt	MODERATE	SNV
MKI67	chr10	128105115.0	Missense_Mutation	p.Ser2242Asn	ENST00000368654	missense_variant	S/N	aGt/aAt	MODERATE	SNV
MKI67	chr10	128106536.0	Missense_Mutation	p.Phe1768Leu	ENST00000368654	missense_variant	F/L	ttT/ttG	MODERATE	SNV
MKI67	chr10	128102950.0	Missense_Mutation	p.Arg2964Trp	ENST00000368654	missense_variant	R/W	Cgg/Tgg	MODERATE	SNV
MKI67	chr10	128105206.0	Missense_Mutation	p.Thr2212Ala	ENST00000368654	missense_variant	T/A	Act/Gct	MODERATE	SNV
MKI67	chr10	128107461.0	Missense_Mutation	p.Lys1460Arg	ENST00000368654	missense_variant	K/R	aAg/aGg	MODERATE	SNV
MKI67	chr10	128101445.0	Missense_Mutation	p.Ser3173Asn	ENST00000368654	missense_variant	S/N	aGc/aAc	MODERATE	SNV
MKI67	chr10	128107828.0	Missense_Mutation	p.Glu1338Lys	ENST00000368654	missense_variant	E/K	Gaa/Aaa	MODERATE	SNV
MKI67	chr10	128107555.0	Missense_Mutation	p.Lys1429Glu	ENST00000368654	missense_variant	K/E	Aaa/Gaa	MODERATE	SNV
MKI67	chr10	128103233.0	Silent	p.=	ENST00000368654	synonymous_variant	T	acG/acA	LOW	SNV
MKI67	chr10	128103117.0	Missense_Mutation	p.Pro2908His	ENST00000368654	missense_variant	P/H	cCt/cAt	MODERATE	SNV
MKI67	chr10	128122944.0	Missense_Mutation	p.Val75Ala	ENST00000368654	missense_variant	V/A	gTt/gCt	MODERATE	SNV
MKI67	chr10	128108678.0	Silent	p.=	ENST00000368654	synonymous_variant	T	acG/acA	LOW	SNV
MKI67	chr10	128104719.0	Frame_Shift_Del	p.Leu2374Ter	ENST00000368654	frameshift_variant	L/X	tTa/ta	HIGH	deletion
MKI67	chr10	128107542.0	Missense_Mutation	p.Ala1433Val	ENST00000368654	missense_variant	A/V	gCg/gTg	MODERATE	SNV
MKI67	chr10	128112200.0	Missense_Mutation	p.Ser634Arg	ENST00000368654	missense_variant	S/R	agT/agA	MODERATE	SNV
MKI67	chr10	128104179.0	Missense_Mutation	p.Arg2554His	ENST00000368654	missense_variant	R/H	cGt/cAt	MODERATE	SNV
MKI67	chr10	128108113.0	Missense_Mutation	p.Ala1243Thr	ENST00000368654	missense_variant	A/T	Gct/Act	MODERATE	SNV
MKI67	chr10	128103523.0	Missense_Mutation	p.Thr2773Ser	ENST00000368654	missense_variant	T/S	Aca/Tca	MODERATE	SNV
MKI67	chr10	128115578.0	Missense_Mutation	p.Ala277Val	ENST00000368654	missense_variant	A/V	gCt/gTt	MODERATE	SNV
MKI67	chr10	128099222.0	Missense_Mutation	p.Thr3247Ala	ENST00000368654	missense_variant	T/A	Acc/Gcc	MODERATE	SNV
MKI67	chr10	128105357.0	Silent	p.=	ENST00000368654	synonymous_variant	R	agG/agA	LOW	SNV
MKI67	chr10	128115598.0	Silent	p.=	ENST00000368654	synonymous_variant	Y	taC/taT	LOW	SNV
MKI67	chr10	128109311.0	Silent	p.=	ENST00000368654	synonymous_variant	K	aaA/aaG	LOW	SNV
MKI67	chr10	128103277.0	Silent	p.=	ENST00000368654	synonymous_variant	L	Ctg/Ttg	LOW	SNV
MKI67	chr10	128106106.0	Missense_Mutation	p.Gly1912Cys	ENST00000368654	missense_variant	G/C	Ggt/Tgt	MODERATE	SNV
MKI67	chr10	128105149.0	Missense_Mutation	p.Thr2231Ala	ENST00000368654	missense_variant	T/A	Acc/Gcc	MODERATE	SNV
MKI67	chr10	128115454.0	Frame_Shift_Del	p.Lys319ArgfsTer27	ENST00000368654	frameshift_variant	G/X	ggG/gg	HIGH	deletion
MKI67	chr10	128104957.0	Missense_Mutation	p.Asn2295His	ENST00000368654	missense_variant	N/H	Aat/Cat	MODERATE	SNV
MKI67	chr10	128115085.0	Silent	p.=	ENST00000368654	synonymous_variant	N	aaT/aaC	LOW	SNV
MKI67	chr10	128101338.0	Missense_Mutation	p.Pro3209Ser	ENST00000368654	missense_variant	P/S	Cct/Tct	MODERATE	SNV
MKI67	chr10	128109132.0	Missense_Mutation	p.Cys903Phe	ENST00000368654	missense_variant	C/F	tGc/tTc	MODERATE	SNV
MKI67	chr10	128106515.0	Silent	p.=	ENST00000368654	synonymous_variant	T	acG/acA	LOW	SNV
MKI67	chr10	128112014.0	Silent	p.=	ENST00000368654	synonymous_variant	L	ctT/ctC	LOW	SNV
MKI67	chr10	128116534.0	Splice_Region	p.=	ENST00000368654	splice_region_variant;synonymous_variant	E	gaG/gaA	LOW	SNV
MKI67	chr10	128115575.0	Missense_Mutation	p.Asp278Gly	ENST00000368654	missense_variant	D/G	gAt/gGt	MODERATE	SNV
MKI67	chr10	128112000.0	Frame_Shift_Ins	p.Thr672AsnfsTer4	ENST00000368654	frameshift_variant	T/NX	aca/aAca	HIGH	insertion
MKI67	chr10	128101427.0	Missense_Mutation	p.Ala3179Val	ENST00000368654	missense_variant	A/V	gCg/gTg	MODERATE	SNV
MKI67	chr10	128099126.0	3'UTR		ENST00000368654	3_prime_UTR_variant			MODIFIER	SNV
MKI67	chr10	128103721.0	Missense_Mutation	p.Glu2707Lys	ENST00000368654	missense_variant	E/K	Gaa/Aaa	MODERATE	SNV
MKI67	chr10	128107838.0	Missense_Mutation	p.Gln1334His	ENST00000368654	missense_variant	Q/H	caA/caC	MODERATE	SNV
MKI67	chr10	128109232.0	Missense_Mutation	p.Ser870Pro	ENST00000368654	missense_variant	S/P	Tcc/Ccc	MODERATE	SNV
MKI67	chr10	128106855.0	Missense_Mutation	p.Thr1662Ile	ENST00000368654	missense_variant	T/I	aCa/aTa	MODERATE	SNV
MKI67	chr10	128108091.0	Missense_Mutation	p.Pro1250Leu	ENST00000368654	missense_variant	P/L	cCc/cTc	MODERATE	SNV
MKI67	chr10	128102735.0	Frame_Shift_Ins	p.Arg3036TyrfsTer27	ENST00000368654	frameshift_variant	P/PYFX	ccc/ccTTATTTTc	HIGH	insertion
MKI67	chr10	128110446.0	Frame_Shift_Ins	p.Leu783TyrfsTer49	ENST00000368654	frameshift_variant	L/YX	ttg/tACtg	HIGH	insertion
MKI67	chr10	128110447.0	Frame_Shift_Ins	p.Leu783HisfsTer49	ENST00000368654	frameshift_variant	-/X	-/CA	HIGH	insertion
MKI67	chr10	128104090.0	Missense_Mutation	p.Ile2584Val	ENST00000368654	missense_variant	I/V	Att/Gtt	MODERATE	SNV
MKI67	chr10	128102599.0	Missense_Mutation	p.Asp3081His	ENST00000368654	missense_variant	D/H	Gac/Cac	MODERATE	SNV
MKI67	chr10	128103168.0	Missense_Mutation	p.Arg2891Gln	ENST00000368654	missense_variant	R/Q	cGg/cAg	MODERATE	SNV
MKI67	chr10	128106490.0	Missense_Mutation	p.Thr1784Ala	ENST00000368654	missense_variant	T/A	Aca/Gca	MODERATE	SNV
CENPF	chr1	214640325.0	Missense_Mutation	p.Glu663Lys	ENST00000366955	missense_variant	E/K	Gag/Aag	MODERATE	SNV
CENPF	chr1	214641636.0	Missense_Mutation	p.Met1100Val	ENST00000366955	missense_variant	M/V	Atg/Gtg	MODERATE	SNV
CENPF	chr1	214642513.0	Missense_Mutation	p.His1392Leu	ENST00000366955	missense_variant	H/L	cAc/cTc	MODERATE	SNV
CENPF	chr1	214644591.0	Missense_Mutation	p.Ser1674Leu	ENST00000366955	missense_variant	S/L	tCa/tTa	MODERATE	SNV
CENPF	chr1	214629105.0	Missense_Mutation	p.Gln376His	ENST00000366955	missense_variant	Q/H	caA/caC	MODERATE	SNV
CENPF	chr1	214641928.0	Missense_Mutation	p.Glu1197Ala	ENST00000366955	missense_variant	E/A	gAa/gCa	MODERATE	SNV
CENPF	chr1	214642148.0	Silent	p.=	ENST00000366955	synonymous_variant	E	gaA/gaG	LOW	SNV
CENPF	chr1	214645456.0	Silent	p.=	ENST00000366955	synonymous_variant	Q	caG/caA	LOW	SNV
CENPF	chr1	214647072.0	Missense_Mutation	p.Ser2501Tyr	ENST00000366955	missense_variant	S/Y	tCt/tAt	MODERATE	SNV
CENPF	chr1	214608528.0	Intron		ENST00000366955	intron_variant			MODIFIER	SNV
CENPF	chr1	214663650.0	Silent	p.=	ENST00000366955	synonymous_variant	T	acG/acA	LOW	SNV
CENPF	chr1	214646095.0	Silent	p.=	ENST00000366955	synonymous_variant	L	ctT/ctA	LOW	SNV
CENPF	chr1	214641485.0	Missense_Mutation	p.Lys1049Asn	ENST00000366955	missense_variant	K/N	aaG/aaT	MODERATE	SNV
CENPF	chr1	214641892.0	Missense_Mutation	p.Arg1185Lys	ENST00000366955	missense_variant	R/K	aGa/aAa	MODERATE	SNV
CENPF	chr1	214642565.0	Missense_Mutation	p.Glu1409Asp	ENST00000366955	missense_variant	E/D	gaG/gaT	MODERATE	SNV
CENPF	chr1	214651850.0	Missense_Mutation	p.Lys2708Asn	ENST00000366955	missense_variant	K/N	aaG/aaT	MODERATE	SNV
CENPF	chr1	214608597.0	Intron		ENST00000366955	intron_variant			MODIFIER	SNV
CENPF	chr1	214641691.0	Missense_Mutation	p.Gln1118Arg	ENST00000366955	missense_variant	Q/R	cAa/cGa	MODERATE	SNV
CENPF	chr1	214622132.0	Nonsense_Mutation	p.Glu307Ter	ENST00000366955	stop_gained	E/*	Gaa/Taa	HIGH	SNV
CENPF	chr1	214641867.0	Missense_Mutation	p.Ser1177Ala	ENST00000366955	missense_variant	S/A	Tct/Gct	MODERATE	SNV
CENPF	chr1	214657094.0	Missense_Mutation	p.Thr2883Ser	ENST00000366955	missense_variant	T/S	Aca/Tca	MODERATE	SNV
CENPF	chr1	214614953.0	Frame_Shift_Del	p.Gln96SerfsTer23	ENST00000366955	frameshift_variant	S/X	tCA/t	HIGH	deletion
CENPF	chr1	214645047.0	Missense_Mutation	p.Ile1826Thr	ENST00000366955	missense_variant	I/T	aTa/aCa	MODERATE	SNV
CENPF	chr1	214647182.0	Missense_Mutation	p.Val2538Leu	ENST00000366955	missense_variant	V/L	Gtc/Ctc	MODERATE	SNV
CENPF	chr1	214655330.0	Silent	p.=	ENST00000366955	synonymous_variant	Q	caG/caA	LOW	SNV
CENPF	chr1	214608366.0	Intron		ENST00000366955	intron_variant			MODIFIER	SNV
CENPF	chr1	214640038.0	Missense_Mutation	p.Arg567Gln	ENST00000366955	missense_variant	R/Q	cGa/cAa	MODERATE	SNV
CENPF	chr1	214645880.0	Missense_Mutation	p.Ala2104Thr	ENST00000366955	missense_variant	A/T	Gca/Aca	MODERATE	SNV
CENPF	chr1	214620708.0	Silent	p.=	ENST00000366955	synonymous_variant	R	cgG/cgA	LOW	SNV
CENPF	chr1	214643230.0	Missense_Mutation	p.Thr1631Met	ENST00000366955	missense_variant	T/M	aCg/aTg	MODERATE	SNV
CENPF	chr1	214605853.0	Intron		ENST00000366955	intron_variant			MODIFIER	SNV
CENPF	chr1	214622077.0	Splice_Site		ENST00000366955	splice_acceptor_variant			HIGH	SNV
CENPF	chr1	214646183.0	Missense_Mutation	p.Leu2205Phe	ENST00000366955	missense_variant	L/F	Ctt/Ttt	MODERATE	SNV
CENPF	chr1	214645483.0	Frame_Shift_Del	p.Thr1974ProfsTer11	ENST00000366955	frameshift_variant	S/X	tcA/tc	HIGH	deletion
CENPF	chr1	214608733.0	Intron		ENST00000366955	intron_variant			MODIFIER	insertion
CENPF	chr1	214608685.0	Intron		ENST00000366955	intron_variant			MODIFIER	deletion
CENPF	chr1	214646131.0	Frame_Shift_Del	p.Thr2189HisfsTer3	ENST00000366955	frameshift_variant	L/X	ctA/ct	HIGH	deletion
CENPF	chr1	214642976.0	Silent	p.=	ENST00000366955	synonymous_variant	A	gcG/gcA	LOW	SNV
CENPF	chr1	214615018.0	Missense_Mutation	p.Glu117Lys	ENST00000366955	missense_variant	E/K	Gaa/Aaa	MODERATE	SNV
CENPF	chr1	214640672.0	Missense_Mutation	p.Glu778Asp	ENST00000366955	missense_variant	E/D	gaA/gaC	MODERATE	SNV
CENPF	chr1	214645449.0	Missense_Mutation	p.Arg1960Ile	ENST00000366955	missense_variant	R/I	aGa/aTa	MODERATE	SNV
CENPF	chr1	214657001.0	Nonsense_Mutation	p.Glu2852Ter	ENST00000366955	stop_gained	E/*	Gaa/Taa	HIGH	SNV
CENPF	chr1	214657310.0	Frame_Shift_Del	p.Ser2957AlafsTer6	ENST00000366955	frameshift_variant	K/X	Aaa/aa	HIGH	deletion
CENPF	chr1	214642368.0	Missense_Mutation	p.Asn1344His	ENST00000366955	missense_variant	N/H	Aat/Cat	MODERATE	SNV
CENPF	chr1	214642766.0	Silent	p.=	ENST00000366955	synonymous_variant	L	ctG/ctA	LOW	SNV
CENPF	chr1	214641588.0	Nonsense_Mutation	p.Glu1084Ter	ENST00000366955	stop_gained	E/*	Gaa/Taa	HIGH	SNV
CENPF	chr1	214645950.0	Missense_Mutation	p.Arg2127His	ENST00000366955	missense_variant	R/H	cGc/cAc	MODERATE	SNV
CENPF	chr1	214646169.0	Missense_Mutation	p.Val2200Ala	ENST00000366955	missense_variant	V/A	gTt/gCt	MODERATE	SNV
CENPF	chr1	214641378.0	Silent	p.=	ENST00000366955	synonymous_variant	L	Tta/Cta	LOW	SNV
CENPF	chr1	214646674.0	Silent	p.=	ENST00000366955	synonymous_variant	T	acC/acA	LOW	SNV
CENPF	chr1	214620797.0	Missense_Mutation	p.Arg239Lys	ENST00000366955	missense_variant	R/K	aGa/aAa	MODERATE	SNV
CENPF	chr1	214645691.0	Missense_Mutation	p.Glu2041Lys	ENST00000366955	missense_variant	E/K	Gaa/Aaa	MODERATE	SNV
CENPF	chr1	214647377.0	Missense_Mutation	p.Asp2603Asn	ENST00000366955	missense_variant	D/N	Gac/Aac	MODERATE	SNV
CENPF	chr1	214641223.0	Missense_Mutation	p.Ile962Ser	ENST00000366955	missense_variant	I/S	aTt/aGt	MODERATE	SNV
CENPF	chr1	214608538.0	Intron		ENST00000366955	intron_variant			MODIFIER	SNV
CENPF	chr1	214618650.0	Frame_Shift_Del	p.Ile148PhefsTer6	ENST00000366955	frameshift_variant	Q/X	cAa/ca	HIGH	deletion
CENPF	chr1	214613897.0	Missense_Mutation	p.Leu48Pro	ENST00000366955	missense_variant	L/P	cTg/cCg	MODERATE	SNV
COL22A1	chr8	138762430.0	Missense_Mutation	p.Gly614Arg	ENST00000303045	missense_variant	G/R	Ggg/Agg	MODERATE	SNV
COL22A1	chr8	138594148.0	Missense_Mutation	p.Ser1495Tyr	ENST00000303045	missense_variant	S/Y	tCt/tAt	MODERATE	SNV
COL22A1	chr8	138613894.0	Missense_Mutation	p.Gln1317His	ENST00000303045	missense_variant	Q/H	caG/caT	MODERATE	SNV
COL22A1	chr8	138811919.0	Splice_Region	p.=	ENST00000303045	splice_region_variant;synonymous_variant	C	tgC/tgT	LOW	SNV
COL22A1	chr8	138878293.0	Missense_Mutation	p.Leu39Met	ENST00000303045	missense_variant	L/M	Ctg/Atg	MODERATE	SNV
COL22A1	chr8	138636796.0	Splice_Site		ENST00000303045	splice_acceptor_variant			HIGH	SNV
COL22A1	chr8	138715732.0	Nonsense_Mutation	p.Glu823Ter	ENST00000303045	stop_gained	E/*	Gaa/Taa	HIGH	SNV
COL22A1	chr8	138833133.0	Missense_Mutation	p.Leu251Val	ENST00000303045	missense_variant	L/V	Ttg/Gtg	MODERATE	SNV
COL22A1	chr8	138589411.0	Missense_Mutation	p.Asp1575Tyr	ENST00000303045	missense_variant	D/Y	Gat/Tat	MODERATE	SNV
COL22A1	chr8	138821403.0	Silent	p.=	ENST00000303045	synonymous_variant	I	atC/atA	LOW	SNV
COL22A1	chr8	138635048.0	Missense_Mutation	p.Pro1191Thr	ENST00000303045	missense_variant	P/T	Cca/Aca	MODERATE	SNV
COL22A1	chr8	138598807.0	Missense_Mutation	p.Gly1426Asp	ENST00000303045	missense_variant	G/D	gGc/gAc	MODERATE	SNV
COL22A1	chr8	138716246.0	Missense_Mutation	p.Arg815Lys	ENST00000303045	missense_variant	R/K	aGa/aAa	MODERATE	SNV
COL22A1	chr8	138878026.0	Missense_Mutation	p.Ser128Gly	ENST00000303045	missense_variant	S/G	Agc/Ggc	MODERATE	SNV
COL22A1	chr8	138844122.0	Missense_Mutation	p.Arg232His	ENST00000303045	missense_variant	R/H	cGc/cAc	MODERATE	SNV
COL22A1	chr8	138826748.0	Silent	p.=	ENST00000303045	synonymous_variant	Y	taC/taT	LOW	SNV
COL22A1	chr8	138589143.0	3'UTR		ENST00000303045	3_prime_UTR_variant			MODIFIER	deletion
COL22A1	chr8	138755174.0	Missense_Mutation	p.Gly672Ser	ENST00000303045	missense_variant	G/S	Ggt/Agt	MODERATE	SNV
COL22A1	chr8	138725419.0	Missense_Mutation	p.Val721Ile	ENST00000303045	missense_variant	V/I	Gtc/Atc	MODERATE	SNV
COL22A1	chr8	138755824.0	Silent	p.=	ENST00000303045	synonymous_variant	D	gaC/gaT	LOW	SNV
COL22A1	chr8	138594067.0	Missense_Mutation	p.Arg1522His	ENST00000303045	missense_variant	R/H	cGt/cAt	MODERATE	SNV
COL22A1	chr8	138589379.0	Silent	p.=	ENST00000303045	synonymous_variant	G	ggG/ggA	LOW	SNV
COL22A1	chr8	138690873.0	Missense_Mutation	p.Gly919Asp	ENST00000303045	missense_variant;splice_region_variant	G/D	gGt/gAt	MODERATE	SNV
COL22A1	chr8	138663741.0	Splice_Site		ENST00000303045	splice_acceptor_variant			HIGH	SNV
COL22A1	chr8	138883236.0	5'UTR		ENST00000303045	5_prime_UTR_variant			MODIFIER	SNV
COL22A1	chr8	138821154.0	Silent	p.=	ENST00000303045	synonymous_variant	Y	taC/taT	LOW	SNV
COL22A1	chr8	138878058.0	Missense_Mutation	p.Thr117Met	ENST00000303045	missense_variant	T/M	aCg/aTg	MODERATE	SNV
COL22A1	chr8	138778404.0	Frame_Shift_Del	p.Gln571LysfsTer85	ENST00000303045	frameshift_variant;splice_region_variant	G/X	ggG/gg	HIGH	deletion
COL22A1	chr8	138844143.0	Missense_Mutation	p.Ser225Ile	ENST00000303045	missense_variant	S/I	aGc/aTc	MODERATE	SNV
COL22A1	chr8	138751504.0	Frame_Shift_Ins	p.Ile680AsnfsTer21	ENST00000303045	frameshift_variant	I/NX	ata/aAta	HIGH	insertion
COL22A1	chr8	138700120.0	Missense_Mutation	p.Arg862Trp	ENST00000303045	missense_variant	R/W	Cgg/Tgg	MODERATE	SNV
COL22A1	chr8	138685231.0	Missense_Mutation	p.Gly982Arg	ENST00000303045	missense_variant	G/R	Gga/Aga	MODERATE	SNV
COL22A1	chr8	138807813.0	Splice_Site		ENST00000303045	splice_acceptor_variant			HIGH	SNV
COL22A1	chr8	138821232.0	Silent	p.=	ENST00000303045	synonymous_variant	A	gcG/gcA	LOW	SNV
COL22A1	chr8	138684448.0	Missense_Mutation	p.Leu997Ile	ENST00000303045	missense_variant	L/I	Ctc/Atc	MODERATE	SNV
COL22A1	chr8	138589279.0	Missense_Mutation	p.Arg1619Trp	ENST00000303045	missense_variant	R/W	Cgg/Tgg	MODERATE	SNV
COL22A1	chr8	138591454.0	Nonsense_Mutation	p.Arg1555Ter	ENST00000303045	stop_gained	R/*	Cga/Tga	HIGH	SNV
COL22A1	chr8	138693664.0	Silent	p.=	ENST00000303045	synonymous_variant	P	ccT/ccC	LOW	SNV
COL22A1	chr8	138616034.0	Frame_Shift_Del	p.Leu1298PhefsTer130	ENST00000303045	frameshift_variant	G/X	ggG/gg	HIGH	deletion
COL22A1	chr8	138679675.0	Missense_Mutation	p.Ala1005Val	ENST00000303045	missense_variant;splice_region_variant	A/V	gCt/gTt	MODERATE	SNV
COL22A1	chr8	138690848.0	Silent	p.=	ENST00000303045	synonymous_variant	P	ccC/ccT	LOW	SNV
COL22A1	chr8	138755479.0	Splice_Region		ENST00000303045	splice_region_variant;intron_variant			LOW	SNV
COL22A1	chr8	138821350.0	Missense_Mutation	p.Lys344Thr	ENST00000303045	missense_variant	K/T	aAa/aCa	MODERATE	SNV
COL22A1	chr8	138813006.0	Missense_Mutation	p.Arg420Gln	ENST00000303045	missense_variant	R/Q	cGg/cAg	MODERATE	SNV
COL22A1	chr8	138598853.0	Missense_Mutation	p.Gly1411Arg	ENST00000303045	missense_variant	G/R	Ggc/Cgc	MODERATE	SNV
COL22A1	chr8	138812966.0	Silent	p.=	ENST00000303045	synonymous_variant	E	gaG/gaA	LOW	SNV
COL22A1	chr8	138755158.0	Missense_Mutation	p.Arg677Gln	ENST00000303045	missense_variant;splice_region_variant	R/Q	cGg/cAg	MODERATE	SNV
COL22A1	chr8	138596916.0	Missense_Mutation	p.Lys1474Glu	ENST00000303045	missense_variant	K/E	Aag/Gag	MODERATE	SNV
COL22A1	chr8	138635046.0	Silent	p.=	ENST00000303045	synonymous_variant	P	ccA/ccT	LOW	SNV
COL22A1	chr8	138878144.0	Silent	p.=	ENST00000303045	synonymous_variant	T	acG/acA	LOW	SNV
COL22A1	chr8	138878155.0	Missense_Mutation	p.Arg85Trp	ENST00000303045	missense_variant	R/W	Cgg/Tgg	MODERATE	SNV
COL22A1	chr8	138589295.0	Silent	p.=	ENST00000303045	synonymous_variant	F	ttC/ttT	LOW	SNV
COL22A1	chr8	138690847.0	Missense_Mutation	p.Gly928Ser	ENST00000303045	missense_variant	G/S	Ggt/Agt	MODERATE	SNV
COL22A1	chr8	138616923.0	Silent	p.=	ENST00000303045	synonymous_variant	P	ccC/ccA	LOW	SNV
COL22A1	chr8	138877885.0	Missense_Mutation	p.Val175Met	ENST00000303045	missense_variant	V/M	Gtg/Atg	MODERATE	SNV
COL22A1	chr8	138821296.0	Missense_Mutation	p.Arg362Leu	ENST00000303045	missense_variant	R/L	cGg/cTg	MODERATE	SNV
POLQ	chr3	121460134.0	Silent	p.=	ENST00000264233	synonymous_variant	A	gcT/gcC	LOW	SNV
POLQ	chr3	121520086.0	Splice_Region		ENST00000264233	splice_region_variant;intron_variant			LOW	deletion
POLQ	chr3	121487760.0	Missense_Mutation	p.Lys1724Thr	ENST00000264233	missense_variant	K/T	aAa/aCa	MODERATE	SNV
POLQ	chr3	121487893.0	Missense_Mutation	p.Glu1680Lys	ENST00000264233	missense_variant	E/K	Gaa/Aaa	MODERATE	SNV
POLQ	chr3	121488326.0	Frame_Shift_Del	p.Lys1535AsnfsTer4	ENST00000264233	frameshift_variant	K/X	aaA/aa	HIGH	deletion
POLQ	chr3	121490352.0	Missense_Mutation	p.Arg860Gln	ENST00000264233	missense_variant	R/Q	cGa/cAa	MODERATE	SNV
POLQ	chr3	121467633.0	Frame_Shift_Del	p.Tyr2285IlefsTer7	ENST00000264233	frameshift_variant	Y/X	Tat/at	HIGH	deletion
POLQ	chr3	121489847.0	Silent	p.=	ENST00000264233	synonymous_variant	L	ttG/ttA	LOW	SNV
POLQ	chr3	121487575.0	Missense_Mutation	p.Ser1786Arg	ENST00000264233	missense_variant	S/R	Agt/Cgt	MODERATE	SNV
POLQ	chr3	121488642.0	Frame_Shift_Del	p.Leu1430Ter	ENST00000264233	frameshift_variant	L/X	tTa/ta	HIGH	deletion
POLQ	chr3	121490263.0	Missense_Mutation	p.Asp890Asn	ENST00000264233	missense_variant	D/N	Gac/Aac	MODERATE	SNV
POLQ	chr3	121489893.0	Missense_Mutation	p.Lys1013Thr	ENST00000264233	missense_variant	K/T	aAg/aCg	MODERATE	SNV
POLQ	chr3	121432339.0	Missense_Mutation	p.Ala2580Thr	ENST00000264233	missense_variant	A/T	Gcc/Acc	MODERATE	SNV
POLQ	chr3	121472025.0	Missense_Mutation	p.Arg2228Ile	ENST00000264233	missense_variant	R/I	aGa/aTa	MODERATE	SNV
POLQ	chr3	121472119.0	Missense_Mutation	p.Ile2197Leu	ENST00000264233	missense_variant	I/L	Ata/Cta	MODERATE	SNV
POLQ	chr3	121539556.0	Missense_Mutation	p.Gly170Ser	ENST00000264233	missense_variant	G/S	Ggt/Agt	MODERATE	SNV
POLQ	chr3	121493637.0	Missense_Mutation	p.Gly788Asp	ENST00000264233	missense_variant	G/D	gGc/gAc	MODERATE	SNV
POLQ	chr3	121519976.0	Missense_Mutation	p.Arg455Cys	ENST00000264233	missense_variant	R/C	Cgt/Tgt	MODERATE	SNV
POLQ	chr3	121481775.0	Missense_Mutation	p.Pro2003Leu	ENST00000264233	missense_variant	P/L	cCg/cTg	MODERATE	SNV
POLQ	chr3	121544798.0	Frame_Shift_Del	p.Lys91ArgfsTer21	ENST00000264233	frameshift_variant	K/X	aAg/ag	HIGH	deletion
POLQ	chr3	121489528.0	Missense_Mutation	p.Glu1135Lys	ENST00000264233	missense_variant	E/K	Gag/Aag	MODERATE	SNV
POLQ	chr3	121481656.0	Nonsense_Mutation	p.Arg2043Ter	ENST00000264233	stop_gained	R/*	Cga/Tga	HIGH	SNV
POLQ	chr3	121489044.0	Missense_Mutation	p.Gly1296Asp	ENST00000264233	missense_variant	G/D	gGt/gAt	MODERATE	SNV
POLQ	chr3	121467585.0	Nonsense_Mutation	p.Glu2301Ter	ENST00000264233	stop_gained	E/*	Gag/Tag	HIGH	SNV
POLQ	chr3	121436268.0	Missense_Mutation	p.Arg2466His	ENST00000264233	missense_variant	R/H	cGt/cAt	MODERATE	SNV
POLQ	chr3	121498621.0	Frame_Shift_Del	p.Phe670SerfsTer11	ENST00000264233	frameshift_variant	F/X	tTc/tc	HIGH	deletion
POLQ	chr3	121468387.0	Missense_Mutation	p.Asp2255Asn	ENST00000264233	missense_variant	D/N	Gat/Aat	MODERATE	SNV
POLQ	chr3	121488780.0	Missense_Mutation	p.Ala1384Val	ENST00000264233	missense_variant	A/V	gCg/gTg	MODERATE	SNV
POLQ	chr3	121468313.0	Silent	p.=	ENST00000264233	synonymous_variant	P	ccC/ccT	LOW	SNV
POLQ	chr3	121529754.0	Silent	p.=	ENST00000264233	synonymous_variant	T	acG/acA	LOW	SNV
POLQ	chr3	121483528.0	Missense_Mutation	p.Asp1943Gly	ENST00000264233	missense_variant	D/G	gAc/gGc	MODERATE	SNV
POLQ	chr3	121487867.0	Missense_Mutation	p.Lys1688Asn	ENST00000264233	missense_variant	K/N	aaA/aaC	MODERATE	SNV
POLQ	chr3	121488328.0	Missense_Mutation	p.Lys1535Gln	ENST00000264233	missense_variant	K/Q	Aaa/Caa	MODERATE	SNV
POLQ	chr3	121488848.0	Missense_Mutation	p.Gln1361His	ENST00000264233	missense_variant	Q/H	caG/caT	MODERATE	SNV
POLQ	chr3	121489460.0	Missense_Mutation	p.Lys1157Asn	ENST00000264233	missense_variant	K/N	aaG/aaT	MODERATE	SNV
POLQ	chr3	121519939.0	Missense_Mutation	p.Arg467Gln	ENST00000264233	missense_variant	R/Q	cGa/cAa	MODERATE	SNV
POLQ	chr3	121539465.0	Missense_Mutation	p.Arg200His	ENST00000264233	missense_variant	R/H	cGc/cAc	MODERATE	SNV
POLQ	chr3	121440026.0	Missense_Mutation	p.Gly2452Glu	ENST00000264233	missense_variant	G/E	gGa/gAa	MODERATE	SNV
POLQ	chr3	121468354.0	Missense_Mutation	p.Glu2266Lys	ENST00000264233	missense_variant	E/K	Gaa/Aaa	MODERATE	SNV
POLQ	chr3	121485120.0	Silent	p.=	ENST00000264233	synonymous_variant	T	acC/acA	LOW	SNV
POLQ	chr3	121510233.0	Missense_Mutation	p.Gly541Asp	ENST00000264233	missense_variant	G/D	gGt/gAt	MODERATE	SNV
POLQ	chr3	121432358.0	Silent	p.=	ENST00000264233	synonymous_variant	K	aaA/aaG	LOW	SNV
POLQ	chr3	121432359.0	Nonsense_Mutation	p.Lys2573delinsArgTer	ENST00000264233	stop_gained;protein_altering_variant	K/R*	aaa/aGGTaa	HIGH	insertion
POLQ	chr3	121489021.0	Missense_Mutation	p.Lys1304Glu	ENST00000264233	missense_variant	K/E	Aaa/Gaa	MODERATE	SNV
POLQ	chr3	121489022.0	Frame_Shift_Ins	p.Lys1304LeufsTer11	ENST00000264233	frameshift_variant	T/TLLX	act/acACTCCTTCt	HIGH	insertion
POLQ	chr3	121510219.0	Frame_Shift_Ins	p.Thr546SerfsTer41	ENST00000264233	frameshift_variant	-/SSSX	-/TCTAGTAGCC	HIGH	insertion
POLQ	chr3	121493508.0	Missense_Mutation	p.Val831Ala	ENST00000264233	missense_variant	V/A	gTg/gCg	MODERATE	SNV
POLQ	chr3	121436171.0	Silent	p.=	ENST00000264233	synonymous_variant	T	acC/acA	LOW	SNV
POLQ	chr3	121436179.0	Frame_Shift_Del	p.His2496ThrfsTer59	ENST00000264233	frameshift_variant	H/X	Cac/ac	HIGH	deletion
POLQ	chr3	121472162.0	Splice_Region	p.=	ENST00000264233	splice_region_variant;synonymous_variant	D	gaC/gaT	LOW	SNV
KIAA1549	chr7	138869632.0	Nonsense_Mutation	p.Arg1561Ter	ENST00000422774	stop_gained	R/*	Cga/Tga	HIGH	SNV
KIAA1549	chr7	138898978.0	Missense_Mutation	p.Arg1275Gln	ENST00000422774	missense_variant	R/Q	cGa/cAa	MODERATE	SNV
KIAA1549	chr7	138919196.0	Missense_Mutation	p.Ser144Pro	ENST00000422774	missense_variant	S/P	Tca/Cca	MODERATE	SNV
KIAA1549	chr7	138894369.0	Silent	p.=	ENST00000422774	synonymous_variant	T	acT/acC	LOW	SNV
KIAA1549	chr7	138917118.0	Silent	p.=	ENST00000422774	synonymous_variant	T	acG/acA	LOW	SNV
KIAA1549	chr7	138844338.0	Missense_Mutation	p.Arg1811Trp	ENST00000422774	missense_variant	R/W	Cgg/Tgg	MODERATE	SNV
KIAA1549	chr7	138916915.0	Missense_Mutation	p.Ala904Val	ENST00000422774	missense_variant	A/V	gCc/gTc	MODERATE	SNV
KIAA1549	chr7	138917015.0	Missense_Mutation	p.Thr871Ser	ENST00000422774	missense_variant	T/S	Aca/Tca	MODERATE	SNV
KIAA1549	chr7	138917315.0	Missense_Mutation	p.Pro771Ser	ENST00000422774	missense_variant	P/S	Ccc/Tcc	MODERATE	SNV
KIAA1549	chr7	138837876.0	3'UTR		ENST00000422774	3_prime_UTR_variant			MODIFIER	SNV
KIAA1549	chr7	138916966.0	Missense_Mutation	p.Ser887Asn	ENST00000422774	missense_variant	S/N	aGc/aAc	MODERATE	SNV
KIAA1549	chr7	138838096.0	Missense_Mutation	p.Gly1888Asp	ENST00000422774	missense_variant	G/D	gGc/gAc	MODERATE	SNV
KIAA1549	chr7	138898992.0	Silent	p.=	ENST00000422774	synonymous_variant	I	atC/atA	LOW	SNV
KIAA1549	chr7	138916857.0	Silent	p.=	ENST00000422774	synonymous_variant	P	ccC/ccT	LOW	SNV
KIAA1549	chr7	138916800.0	Frame_Shift_Ins	p.Pro943AlafsTer6	ENST00000422774	frameshift_variant	K/KX	aag/aaAg	HIGH	insertion
KIAA1549	chr7	138918917.0	Missense_Mutation	p.Arg237Cys	ENST00000422774	missense_variant	R/C	Cgc/Tgc	MODERATE	SNV
KIAA1549	chr7	138919328.0	Missense_Mutation	p.Gly100Ser	ENST00000422774	missense_variant	G/S	Ggc/Agc	MODERATE	SNV
KIAA1549	chr7	138871280.0	Frame_Shift_Ins	p.Glu1477GlyfsTer3	ENST00000422774	frameshift_variant	P/PX	ccg/ccCg	HIGH	insertion
KIAA1549	chr7	138903635.0	Missense_Mutation	p.Arg1208Trp	ENST00000422774	missense_variant	R/W	Cgg/Tgg	MODERATE	SNV
KIAA1549	chr7	138868124.0	Missense_Mutation	p.Arg1594Trp	ENST00000422774	missense_variant	R/W	Cgg/Tgg	MODERATE	SNV
KIAA1549	chr7	138881459.0	Silent	p.=	ENST00000422774	synonymous_variant	T	acG/acA	LOW	SNV
KIAA1549	chr7	138918110.0	Missense_Mutation	p.Gly506Ser	ENST00000422774	missense_variant	G/S	Ggc/Agc	MODERATE	SNV
KIAA1549	chr7	138868115.0	Missense_Mutation	p.Arg1597Cys	ENST00000422774	missense_variant	R/C	Cgt/Tgt	MODERATE	SNV
KIAA1549	chr7	138919257.0	Frame_Shift_Del	p.Phe123LeufsTer23	ENST00000422774	frameshift_variant	F/X	ttT/tt	HIGH	deletion
KIAA1549	chr7	138869728.0	Missense_Mutation	p.Glu1529Lys	ENST00000422774	missense_variant	E/K	Gag/Aag	MODERATE	SNV
KIAA1549	chr7	138917444.0	Missense_Mutation	p.Glu728Lys	ENST00000422774	missense_variant	E/K	Gag/Aag	MODERATE	SNV
KIAA1549	chr7	138861454.0	Splice_Region	p.=	ENST00000422774	splice_region_variant;synonymous_variant	S	tcG/tcA	LOW	SNV
KIAA1549	chr7	138867990.0	Silent	p.=	ENST00000422774	synonymous_variant	A	gcC/gcA	LOW	SNV
KIAA1549	chr7	138917707.0	Missense_Mutation	p.Ser640Leu	ENST00000422774	missense_variant	S/L	tCg/tTg	MODERATE	SNV
KIAA1549	chr7	138918512.0	Missense_Mutation	p.Ala372Thr	ENST00000422774	missense_variant	A/T	Gct/Act	MODERATE	SNV
KIAA1549	chr7	138911221.0	Missense_Mutation	p.Arg1024Gly	ENST00000422774	missense_variant	R/G	Cgt/Ggt	MODERATE	SNV
KIAA1549	chr7	138852241.0	Frame_Shift_Del	p.Pro1759ArgfsTer66	ENST00000422774	frameshift_variant	P/X	cCg/cg	HIGH	deletion
KIAA1549	chr7	138917890.0	Missense_Mutation	p.Pro579Gln	ENST00000422774	missense_variant	P/Q	cCg/cAg	MODERATE	SNV
KIAA1549	chr7	138918778.0	Frame_Shift_Del	p.Leu283Ter	ENST00000422774	frameshift_variant	L/X	tTa/ta	HIGH	deletion
KIAA1549	chr7	138871181.0	Silent	p.=	ENST00000422774	synonymous_variant	A	gcG/gcA	LOW	SNV
KIAA1549	chr7	138840197.0	Missense_Mutation	p.Gly1845Asp	ENST00000422774	missense_variant	G/D	gGc/gAc	MODERATE	SNV
KIAA1549	chr7	138918778.0	Nonsense_Mutation	p.Leu283Ter	ENST00000422774	stop_gained	L/*	tTa/tAa	HIGH	SNV
KIAA1549	chr7	138917592.0	Silent	p.=	ENST00000422774	synonymous_variant	L	ctG/ctA	LOW	SNV
KIAA1549	chr7	138909056.0	Missense_Mutation	p.Gly1071Cys	ENST00000422774	missense_variant	G/C	Ggc/Tgc	MODERATE	SNV
KIAA1549	chr7	138837963.0	Silent	p.=	ENST00000422774	synonymous_variant	R	cgC/cgT	LOW	SNV
KIAA1549	chr7	138919368.0	Silent	p.=	ENST00000422774	synonymous_variant	G	ggG/ggT	LOW	SNV
KIAA1549	chr7	138917938.0	Missense_Mutation	p.Ser563Asn	ENST00000422774	missense_variant	S/N	aGc/aAc	MODERATE	SNV
KIAA1549	chr7	138918030.0	Silent	p.=	ENST00000422774	synonymous_variant	A	gcG/gcA	LOW	SNV
KIAA1549	chr7	138919329.0	Silent	p.=	ENST00000422774	synonymous_variant	P	ccC/ccT	LOW	SNV
KIAA1549	chr7	138918361.0	Missense_Mutation	p.Ala422Val	ENST00000422774	missense_variant	A/V	gCg/gTg	MODERATE	SNV
KIAA1549	chr7	138918579.0	Silent	p.=	ENST00000422774	synonymous_variant	H	caC/caT	LOW	SNV
KIAA1549	chr7	138917580.0	Silent	p.=	ENST00000422774	synonymous_variant	Q	caG/caA	LOW	SNV
KIAA1549	chr7	138917895.0	Frame_Shift_Ins	p.Asn577LysfsTer17	ENST00000422774	frameshift_variant	N/KX	aac/aaAc	HIGH	insertion
KIAA1549	chr7	138918775.0	Missense_Mutation	p.Ser284Ile	ENST00000422774	missense_variant	S/I	aGc/aTc	MODERATE	SNV
KIAA1549	chr7	138917310.0	Frame_Shift_Del	p.Gly773AlafsTer8	ENST00000422774	frameshift_variant	P/X	ccC/cc	HIGH	deletion
KIAA1549	chr7	138837874.0	3'UTR		ENST00000422774	3_prime_UTR_variant			MODIFIER	SNV
KIAA1549	chr7	138838043.0	Missense_Mutation	p.Pro1906Thr	ENST00000422774	missense_variant	P/T	Cct/Act	MODERATE	SNV
KIAA1549	chr7	138918726.0	Silent	p.=	ENST00000422774	synonymous_variant	P	ccG/ccA	LOW	SNV

## Sheet: neoantigen_NvsL
SYMBOL	Chromosome	Start_Position	Variant_Classification	HGVSp	Transcript_ID	Consequence	Amino_acids	Codons	IMPACT	VARIANT_CLASS
MUC16	chr19	8949048.0	Missense_Mutation	p.Val9241Asp	ENST00000397910	missense_variant	V/D	gTc/gAc	MODERATE	SNV
MUC16	chr19	8980397.0	Missense_Mutation	p.Ser248Thr	ENST00000397910	missense_variant	S/T	Tcc/Acc	MODERATE	SNV
MUC16	chr19	8965879.0	Missense_Mutation	p.Pro3631Thr	ENST00000397910	missense_variant	P/T	Ccc/Acc	MODERATE	SNV
MUC16	chr19	8895005.0	Missense_Mutation	p.Arg13242His	ENST00000397910	missense_variant	R/H	cGc/cAc	MODERATE	SNV
MUC16	chr19	8915589.0	Silent	p.=	ENST00000397910	synonymous_variant	L	Ctg/Ttg	LOW	SNV
MUC16	chr19	8948233.0	Missense_Mutation	p.His9513Tyr	ENST00000397910	missense_variant	H/Y	Cac/Tac	MODERATE	SNV
MUC16	chr19	8949216.0	Missense_Mutation	p.Thr9185Ile	ENST00000397910	missense_variant	T/I	aCc/aTc	MODERATE	SNV
MUC16	chr19	8950725.0	Missense_Mutation	p.Leu8682Pro	ENST00000397910	missense_variant	L/P	cTg/cCg	MODERATE	SNV
MUC16	chr19	8952104.0	Silent	p.=	ENST00000397910	synonymous_variant	T	acA/acT	LOW	SNV
MUC16	chr19	8965244.0	Silent	p.=	ENST00000397910	synonymous_variant	T	acA/acG	LOW	SNV
MUC16	chr19	8947084.0	Missense_Mutation	p.Ala9896Ser	ENST00000397910	missense_variant	A/S	Gca/Tca	MODERATE	SNV
MUC16	chr19	8863420.0	Missense_Mutation	p.Ala14192Val	ENST00000397910	missense_variant	A/V	gCa/gTa	MODERATE	SNV
MUC16	chr19	8907883.0	Missense_Mutation	p.Ala12539Ser	ENST00000397910	missense_variant;splice_region_variant	A/S	Gct/Tct	MODERATE	SNV
MUC16	chr19	8938756.0	Silent	p.=	ENST00000397910	synonymous_variant	A	gcA/gcG	LOW	SNV
MUC16	chr19	8951440.0	Missense_Mutation	p.Ala8444Thr	ENST00000397910	missense_variant	A/T	Gct/Act	MODERATE	SNV
MUC16	chr19	8866992.0	Missense_Mutation	p.Phe14059Leu	ENST00000397910	missense_variant	F/L	ttC/ttA	MODERATE	SNV
MUC16	chr19	8937047.0	Missense_Mutation	p.Ser11303Tyr	ENST00000397910	missense_variant	S/Y	tCc/tAc	MODERATE	SNV
MUC16	chr19	8950348.0	Missense_Mutation	p.Ser8808Gly	ENST00000397910	missense_variant	S/G	Agc/Ggc	MODERATE	SNV
MUC16	chr19	8952867.0	Frame_Shift_Ins	p.Thr7968AsnfsTer2	ENST00000397910	frameshift_variant	T/NX	act/aAct	HIGH	insertion
MUC16	chr19	8883748.0	Missense_Mutation	p.Gln13823Arg	ENST00000397910	missense_variant	Q/R	cAg/cGg	MODERATE	SNV
MUC16	chr19	8922960.0	Missense_Mutation	p.Ala12101Thr	ENST00000397910	missense_variant	A/T	Gcc/Acc	MODERATE	SNV
MUC16	chr19	8927420.0	Silent	p.=	ENST00000397910	synonymous_variant	S	tcC/tcA	LOW	SNV
MUC16	chr19	8936515.0	Silent	p.=	ENST00000397910	synonymous_variant	E	gaG/gaA	LOW	SNV
MUC16	chr19	8939391.0	Missense_Mutation	p.Glu10522Lys	ENST00000397910	missense_variant	E/K	Gaa/Aaa	MODERATE	SNV
MUC16	chr19	8945505.0	Missense_Mutation	p.Arg10422Gln	ENST00000397910	missense_variant	R/Q	cGg/cAg	MODERATE	SNV
MUC16	chr19	8947166.0	Silent	p.=	ENST00000397910	synonymous_variant	P	ccG/ccA	LOW	SNV
MUC16	chr19	8947807.0	Missense_Mutation	p.Thr9655Ala	ENST00000397910	missense_variant	T/A	Aca/Gca	MODERATE	SNV
MUC16	chr19	8948746.0	Missense_Mutation	p.Ser9342Pro	ENST00000397910	missense_variant	S/P	Tca/Cca	MODERATE	SNV
MUC16	chr19	8949205.0	Silent	p.=	ENST00000397910	synonymous_variant	L	Ttg/Ctg	LOW	SNV
MUC16	chr19	8950272.0	Missense_Mutation	p.Ser8833Asn	ENST00000397910	missense_variant	S/N	aGc/aAc	MODERATE	SNV
MUC16	chr19	8950647.0	Missense_Mutation	p.Ser8708Tyr	ENST00000397910	missense_variant	S/Y	tCt/tAt	MODERATE	SNV
MUC16	chr19	8950953.0	Missense_Mutation	p.Arg8606His	ENST00000397910	missense_variant	R/H	cGc/cAc	MODERATE	SNV
MUC16	chr19	8956811.0	Missense_Mutation	p.Phe6653Leu	ENST00000397910	missense_variant	F/L	ttC/ttA	MODERATE	SNV
MUC16	chr19	8958321.0	Missense_Mutation	p.Ser6150Tyr	ENST00000397910	missense_variant	S/Y	tCt/tAt	MODERATE	SNV
MUC16	chr19	8962155.0	Missense_Mutation	p.Ile4872Asn	ENST00000397910	missense_variant	I/N	aTt/aAt	MODERATE	SNV
MUC16	chr19	8966791.0	Missense_Mutation	p.Thr3327Ala	ENST00000397910	missense_variant	T/A	Act/Gct	MODERATE	SNV
MUC16	chr19	8967099.0	Missense_Mutation	p.Val3224Ala	ENST00000397910	missense_variant	V/A	gTg/gCg	MODERATE	SNV
MUC16	chr19	8972984.0	Nonsense_Mutation	p.Glu2719Ter	ENST00000397910	stop_gained	E/*	Gaa/Taa	HIGH	SNV
MUC16	chr19	8976870.0	Silent	p.=	ENST00000397910	synonymous_variant	T	acC/acA	LOW	SNV
MUC16	chr19	8978108.0	Missense_Mutation	p.Ala1011Thr	ENST00000397910	missense_variant	A/T	Gca/Aca	MODERATE	SNV
MUC16	chr19	8895022.0	Silent	p.=	ENST00000397910	synonymous_variant	D	gaC/gaT	LOW	SNV
MUC16	chr19	8907831.0	Missense_Mutation	p.Lys12556Thr	ENST00000397910	missense_variant	K/T	aAg/aCg	MODERATE	SNV
MUC16	chr19	8948250.0	Missense_Mutation	p.Thr9507Met	ENST00000397910	missense_variant	T/M	aCg/aTg	MODERATE	SNV
MUC16	chr19	8858600.0	Splice_Region	p.=	ENST00000397910	splice_region_variant;synonymous_variant	A	gcG/gcA	LOW	SNV
MUC16	chr19	8910149.0	Missense_Mutation	p.Pro12426His	ENST00000397910	missense_variant	P/H	cCc/cAc	MODERATE	SNV
MUC16	chr19	8936928.0	Missense_Mutation	p.Glu11343Lys	ENST00000397910	missense_variant	E/K	Gaa/Aaa	MODERATE	SNV
MUC16	chr19	8955166.0	Missense_Mutation	p.Asp7202Asn	ENST00000397910	missense_variant	D/N	Gac/Aac	MODERATE	SNV
MUC16	chr19	8973683.0	Missense_Mutation	p.Gly2486Arg	ENST00000397910	missense_variant	G/R	Gga/Cga	MODERATE	SNV
MUC16	chr19	8958071.0	Silent	p.=	ENST00000397910	synonymous_variant	P	ccT/ccG	LOW	SNV
MUC16	chr19	8961024.0	Missense_Mutation	p.Thr5249Lys	ENST00000397910	missense_variant	T/K	aCa/aAa	MODERATE	SNV
MUC16	chr19	8851704.0	Missense_Mutation	p.Arg14440Ile	ENST00000397910	missense_variant	R/I	aGa/aTa	MODERATE	SNV
MUC16	chr19	8960135.0	Silent	p.=	ENST00000397910	synonymous_variant	T	acA/acG	LOW	SNV
MUC16	chr19	8959103.0	Silent	p.=	ENST00000397910	synonymous_variant	T	acT/acG	LOW	SNV
MUC16	chr19	8907879.0	Missense_Mutation	p.Gly12540Val	ENST00000397910	missense_variant	G/V	gGc/gTc	MODERATE	SNV
MUC16	chr19	8950367.0	Silent	p.=	ENST00000397910	synonymous_variant	T	acC/acT	LOW	SNV
MUC16	chr19	8894970.0	Nonsense_Mutation	p.Gln13254Ter	ENST00000397910	stop_gained	Q/*	Cag/Tag	HIGH	SNV
MUC16	chr19	8946272.0	Silent	p.=	ENST00000397910	synonymous_variant	T	acT/acG	LOW	SNV
MUC16	chr19	8961831.0	Missense_Mutation	p.Pro4980His	ENST00000397910	missense_variant	P/H	cCt/cAt	MODERATE	SNV
MUC16	chr19	8957247.0	Missense_Mutation	p.Thr6508Asn	ENST00000397910	missense_variant	T/N	aCc/aAc	MODERATE	SNV
MUC16	chr19	8962003.0	Missense_Mutation	p.Ala4923Thr	ENST00000397910	missense_variant	A/T	Gcc/Acc	MODERATE	SNV
MUC16	chr19	8976744.0	Silent	p.=	ENST00000397910	synonymous_variant	L	ttG/ttA	LOW	SNV
MUC16	chr19	8979096.0	Silent	p.=	ENST00000397910	synonymous_variant	E	gaG/gaA	LOW	SNV
MUC16	chr19	8973211.0	Nonsense_Mutation	p.Leu2643Ter	ENST00000397910	stop_gained	L/*	tTa/tAa	HIGH	SNV
MUC16	chr19	8900701.0	Silent	p.=	ENST00000397910	synonymous_variant	H	caT/caC	LOW	SNV
MUC16	chr19	8908623.0	Missense_Mutation	p.Pro12530Ser	ENST00000397910	missense_variant	P/S	Cca/Tca	MODERATE	SNV
MUC16	chr19	8947145.0	Silent	p.=	ENST00000397910	synonymous_variant	L	ttG/ttA	LOW	SNV
MUC16	chr19	8961509.0	Silent	p.=	ENST00000397910	synonymous_variant	L	ttG/ttA	LOW	SNV
MUC16	chr19	8964424.0	Missense_Mutation	p.Ala4116Thr	ENST00000397910	missense_variant	A/T	Gcc/Acc	MODERATE	SNV
MUC16	chr19	8952116.0	Silent	p.=	ENST00000397910	synonymous_variant	D	gaC/gaT	LOW	SNV
MUC16	chr19	8977579.0	Missense_Mutation	p.Thr1187Ser	ENST00000397910	missense_variant	T/S	aCt/aGt	MODERATE	SNV
MUC16	chr19	8905004.0	Missense_Mutation	p.Asp12715Asn	ENST00000397910	missense_variant	D/N	Gac/Aac	MODERATE	SNV
MUC16	chr19	8937249.0	Missense_Mutation	p.Asp11236Tyr	ENST00000397910	missense_variant	D/Y	Gac/Tac	MODERATE	SNV
MUC16	chr19	8938782.0	Missense_Mutation	p.Pro10725Ser	ENST00000397910	missense_variant	P/S	Cca/Tca	MODERATE	SNV
MUC16	chr19	8945745.0	Missense_Mutation	p.Ser10342Tyr	ENST00000397910	missense_variant	S/Y	tCt/tAt	MODERATE	SNV
MUC16	chr19	8949516.0	Missense_Mutation	p.Ser9085Tyr	ENST00000397910	missense_variant	S/Y	tCt/tAt	MODERATE	SNV
MUC16	chr19	8950475.0	Silent	p.=	ENST00000397910	synonymous_variant	I	atC/atA	LOW	SNV
MUC16	chr19	8952311.0	Silent	p.=	ENST00000397910	synonymous_variant	V	gtC/gtA	LOW	SNV
MUC16	chr19	8955821.0	Silent	p.=	ENST00000397910	synonymous_variant	V	gtC/gtA	LOW	SNV
MUC16	chr19	8961603.0	Missense_Mutation	p.Ser5056Tyr	ENST00000397910	missense_variant	S/Y	tCt/tAt	MODERATE	SNV
MUC16	chr19	8962147.0	Missense_Mutation	p.Ser4875Pro	ENST00000397910	missense_variant	S/P	Tca/Cca	MODERATE	SNV
MUC16	chr19	8965638.0	Missense_Mutation	p.Ser3711Tyr	ENST00000397910	missense_variant	S/Y	tCt/tAt	MODERATE	SNV
MUC16	chr19	8966597.0	Missense_Mutation	p.Glu3391Asp	ENST00000397910	missense_variant	E/D	gaG/gaT	MODERATE	SNV
MUC16	chr19	8972072.0	Missense_Mutation	p.Ala3023Thr	ENST00000397910	missense_variant	A/T	Gca/Aca	MODERATE	SNV
MUC16	chr19	8975088.0	Missense_Mutation	p.Glu2017Asp	ENST00000397910	missense_variant	E/D	gaG/gaT	MODERATE	SNV
MUC16	chr19	8977669.0	Missense_Mutation	p.Ser1157Tyr	ENST00000397910	missense_variant	S/Y	tCt/tAt	MODERATE	SNV
MUC16	chr19	8965536.0	Nonsense_Mutation	p.Ser3745Ter	ENST00000397910	stop_gained	S/*	tCa/tAa	HIGH	SNV
MUC16	chr19	8974906.0	Missense_Mutation	p.Ser2078Tyr	ENST00000397910	missense_variant	S/Y	tCt/tAt	MODERATE	SNV
MUC16	chr19	8979028.0	Missense_Mutation	p.Arg704Ile	ENST00000397910	missense_variant	R/I	aGa/aTa	MODERATE	SNV
MUC16	chr19	8976412.0	Missense_Mutation	p.Ser1576Tyr	ENST00000397910	missense_variant	S/Y	tCt/tAt	MODERATE	SNV
MUC16	chr19	8979207.0	Silent	p.=	ENST00000397910	synonymous_variant	T	acG/acA	LOW	SNV
MUC16	chr19	8906040.0	Missense_Mutation	p.Gly12674Glu	ENST00000397910	missense_variant	G/E	gGg/gAg	MODERATE	SNV
MUC16	chr19	8947560.0	Missense_Mutation	p.Thr9737Ile	ENST00000397910	missense_variant	T/I	aCc/aTc	MODERATE	SNV
MUC16	chr19	8979165.0	Silent	p.=	ENST00000397910	synonymous_variant	T	acG/acA	LOW	SNV
MUC16	chr19	8972332.0	Frame_Shift_Del	p.Asn2936ThrfsTer6	ENST00000397910	frameshift_variant	N/X	aAc/ac	HIGH	deletion
MUC16	chr19	8953445.0	Silent	p.=	ENST00000397910	synonymous_variant	T	acC/acA	LOW	SNV
MUC16	chr19	8965875.0	Frame_Shift_Ins	p.His3632ProfsTer17	ENST00000397910	frameshift_variant	H/PX	cat/cCat	HIGH	insertion
MUC16	chr19	8866126.0	Nonsense_Mutation	p.Tyr14088Ter	ENST00000397910	stop_gained	Y/*	taT/taG	HIGH	SNV
MUC16	chr19	8937437.0	Missense_Mutation	p.Ser11173Tyr	ENST00000397910	missense_variant	S/Y	tCt/tAt	MODERATE	SNV
MUC16	chr19	8938430.0	Missense_Mutation	p.Phe10842Cys	ENST00000397910	missense_variant	F/C	tTt/tGt	MODERATE	SNV
MUC16	chr19	8950480.0	Missense_Mutation	p.Glu8764Lys	ENST00000397910	missense_variant	E/K	Gaa/Aaa	MODERATE	SNV
MUC16	chr19	8952516.0	Missense_Mutation	p.Ser8085Tyr	ENST00000397910	missense_variant	S/Y	tCt/tAt	MODERATE	SNV
MUC16	chr19	8953537.0	Missense_Mutation	p.Ser7745Arg	ENST00000397910	missense_variant	S/R	Agt/Cgt	MODERATE	SNV
MUC16	chr19	8954056.0	Missense_Mutation	p.Thr7572Ala	ENST00000397910	missense_variant	T/A	Act/Gct	MODERATE	SNV
MUC16	chr19	8958058.0	Missense_Mutation	p.Ser6238Pro	ENST00000397910	missense_variant	S/P	Tcc/Ccc	MODERATE	SNV
MUC16	chr19	8961209.0	Missense_Mutation	p.Phe5187Leu	ENST00000397910	missense_variant	F/L	ttC/ttA	MODERATE	SNV
MUC16	chr19	8963325.0	Missense_Mutation	p.Ala4482Val	ENST00000397910	missense_variant	A/V	gCg/gTg	MODERATE	SNV
MUC16	chr19	8964191.0	Missense_Mutation	p.Phe4193Leu	ENST00000397910	missense_variant	F/L	ttC/ttA	MODERATE	SNV
MUC16	chr19	8971805.0	Missense_Mutation	p.Thr3112Pro	ENST00000397910	missense_variant	T/P	Acg/Ccg	MODERATE	SNV
MUC16	chr19	8977891.0	Missense_Mutation	p.Ser1083Phe	ENST00000397910	missense_variant	S/F	tCt/tTt	MODERATE	SNV
MUC16	chr19	8979863.0	Nonsense_Mutation	p.Gly426Ter	ENST00000397910	stop_gained	G/*	Gga/Tga	HIGH	SNV
MUC16	chr19	8979977.0	Nonsense_Mutation	p.Glu388Ter	ENST00000397910	stop_gained	E/*	Gaa/Taa	HIGH	SNV
MUC16	chr19	8948593.0	Missense_Mutation	p.Pro9393Ser	ENST00000397910	missense_variant	P/S	Cca/Tca	MODERATE	SNV
MUC16	chr19	8958402.0	Missense_Mutation	p.Ala6123Asp	ENST00000397910	missense_variant	A/D	gCt/gAt	MODERATE	SNV
MUC16	chr19	8937001.0	Silent	p.=	ENST00000397910	synonymous_variant	V	gtG/gtA	LOW	SNV
MUC16	chr19	8949265.0	Missense_Mutation	p.Ser9169Thr	ENST00000397910	missense_variant	S/T	Tct/Act	MODERATE	SNV
MUC16	chr19	8962500.0	Missense_Mutation	p.Pro4757Arg	ENST00000397910	missense_variant	P/R	cCt/cGt	MODERATE	SNV
MUC16	chr19	8935926.0	Silent	p.=	ENST00000397910	synonymous_variant	R	Cgg/Agg	LOW	SNV
MUC16	chr19	8955441.0	Missense_Mutation	p.Pro7110His	ENST00000397910	missense_variant	P/H	cCc/cAc	MODERATE	SNV
MUC16	chr19	8976927.0	Silent	p.=	ENST00000397910	synonymous_variant	K	aaA/aaG	LOW	SNV
MUC16	chr19	8948109.0	Missense_Mutation	p.Ser9554Phe	ENST00000397910	missense_variant	S/F	tCt/tTt	MODERATE	SNV
MUC16	chr19	8938972.0	Silent	p.=	ENST00000397910	synonymous_variant	T	acA/acC	LOW	SNV
MUC16	chr19	8947936.0	Missense_Mutation	p.Thr9612Ala	ENST00000397910	missense_variant	T/A	Act/Gct	MODERATE	SNV
MUC16	chr19	8956803.0	Missense_Mutation	p.Ala6656Asp	ENST00000397910	missense_variant	A/D	gCt/gAt	MODERATE	SNV
MUC16	chr19	8950755.0	Missense_Mutation	p.Pro8672His	ENST00000397910	missense_variant	P/H	cCc/cAc	MODERATE	SNV
MUC16	chr19	8974469.0	Missense_Mutation	p.Ala2224Thr	ENST00000397910	missense_variant	A/T	Gca/Aca	MODERATE	SNV
MUC16	chr19	8975205.0	Silent	p.=	ENST00000397910	synonymous_variant	G	ggC/ggT	LOW	SNV
MUC16	chr19	8976319.0	Frame_Shift_Ins	p.Trp1607LeufsTer13	ENST00000397910	frameshift_variant	W/LX	tgg/tTgg	HIGH	insertion
MUC16	chr19	8980431.0	Silent	p.=	ENST00000397910	synonymous_variant	S	tcC/tcA	LOW	SNV
MUC16	chr19	8935388.0	Missense_Mutation	p.Thr11856Ile	ENST00000397910	missense_variant	T/I	aCa/aTa	MODERATE	SNV
MUC16	chr19	8935416.0	Frame_Shift_Del	p.Thr11847GlnfsTer15	ENST00000397910	frameshift_variant	T/X	Aca/ca	HIGH	deletion
MUC16	chr19	8960792.0	Silent	p.=	ENST00000397910	synonymous_variant	T	acT/acC	LOW	SNV
MUC16	chr19	8961242.0	Missense_Mutation	p.Glu5176Asp	ENST00000397910	missense_variant	E/D	gaG/gaC	MODERATE	SNV
MUC16	chr19	8905034.0	Missense_Mutation	p.Phe12705Val	ENST00000397910	missense_variant	F/V	Ttc/Gtc	MODERATE	SNV
MUC16	chr19	8946534.0	Missense_Mutation	p.Thr10079Ile	ENST00000397910	missense_variant	T/I	aCc/aTc	MODERATE	SNV
MUC16	chr19	8956969.0	Missense_Mutation	p.Thr6601Ala	ENST00000397910	missense_variant	T/A	Act/Gct	MODERATE	SNV
MUC16	chr19	8965444.0	Missense_Mutation	p.Leu3776Val	ENST00000397910	missense_variant	L/V	Ttg/Gtg	MODERATE	SNV
MUC16	chr19	8952970.0	Missense_Mutation	p.His7934Tyr	ENST00000397910	missense_variant	H/Y	Cac/Tac	MODERATE	SNV
MUC16	chr19	8865620.0	Missense_Mutation	p.Phe14178Val	ENST00000397910	missense_variant	F/V	Ttc/Gtc	MODERATE	SNV
MUC16	chr19	8979228.0	Silent	p.=	ENST00000397910	synonymous_variant	S	tcC/tcT	LOW	SNV
MUC16	chr19	8958050.0	Silent	p.=	ENST00000397910	synonymous_variant	L	ttG/ttA	LOW	SNV
MUC16	chr19	8979322.0	Missense_Mutation	p.Pro606His	ENST00000397910	missense_variant	P/H	cCc/cAc	MODERATE	SNV
MUC16	chr19	8947331.0	Silent	p.=	ENST00000397910	synonymous_variant	A	gcG/gcT	LOW	SNV
MUC16	chr19	8954781.0	Missense_Mutation	p.Thr7330Lys	ENST00000397910	missense_variant	T/K	aCa/aAa	MODERATE	SNV
MUC16	chr19	8863328.0	Missense_Mutation	p.Tyr14223Asp	ENST00000397910	missense_variant	Y/D	Tac/Gac	MODERATE	SNV
MUC16	chr19	8891965.0	Missense_Mutation	p.Asp13392Gly	ENST00000397910	missense_variant	D/G	gAt/gGt	MODERATE	SNV
MUC16	chr19	8978924.0	Missense_Mutation	p.Ala739Thr	ENST00000397910	missense_variant	A/T	Gcg/Acg	MODERATE	SNV
MUC16	chr19	8951662.0	Missense_Mutation	p.Leu8370Ile	ENST00000397910	missense_variant	L/I	Cta/Ata	MODERATE	SNV
MUC16	chr19	8953390.0	Missense_Mutation	p.Ser7794Thr	ENST00000397910	missense_variant	S/T	Tca/Aca	MODERATE	SNV
MUC16	chr19	8957679.0	Missense_Mutation	p.Leu6364Gln	ENST00000397910	missense_variant	L/Q	cTg/cAg	MODERATE	SNV
MUC16	chr19	8871535.0	Missense_Mutation	p.Gly14022Ser	ENST00000397910	missense_variant	G/S	Ggc/Agc	MODERATE	SNV
MUC16	chr19	8950126.0	Missense_Mutation	p.Arg8882Trp	ENST00000397910	missense_variant	R/W	Cgg/Tgg	MODERATE	SNV
MUC16	chr19	8951164.0	Missense_Mutation	p.Met8536Leu	ENST00000397910	missense_variant	M/L	Atg/Ctg	MODERATE	SNV
MUC16	chr19	8957953.0	Missense_Mutation	p.Thr6273Ala	ENST00000397910	missense_variant	T/A	Act/Gct	MODERATE	SNV
MUC16	chr19	8938987.0	Silent	p.=	ENST00000397910	synonymous_variant	V	gtC/gtT	LOW	SNV
MUC16	chr19	8946899.0	Silent	p.=	ENST00000397910	synonymous_variant	T	acC/acT	LOW	SNV
MUC16	chr19	8889792.0	Missense_Mutation	p.Thr13506Ala	ENST00000397910	missense_variant	T/A	Acc/Gcc	MODERATE	SNV
MUC16	chr19	8935401.0	Missense_Mutation	p.Thr11852Pro	ENST00000397910	missense_variant	T/P	Acc/Ccc	MODERATE	SNV
MUC16	chr19	8966411.0	Silent	p.=	ENST00000397910	synonymous_variant	T	acC/acA	LOW	SNV
MUC16	chr19	8896029.0	Missense_Mutation	p.Glu13181Asp	ENST00000397910	missense_variant	E/D	gaG/gaT	MODERATE	SNV
MUC16	chr19	8952494.0	Silent	p.=	ENST00000397910	synonymous_variant	T	acC/acA	LOW	SNV
MUC16	chr19	8949338.0	Silent	p.=	ENST00000397910	synonymous_variant	A	gcC/gcT	LOW	SNV
MUC16	chr19	8959887.0	Missense_Mutation	p.Thr5628Ser	ENST00000397910	missense_variant	T/S	aCc/aGc	MODERATE	SNV
MUC16	chr19	8973664.0	Missense_Mutation	p.Ser2492Thr	ENST00000397910	missense_variant	S/T	aGc/aCc	MODERATE	SNV
MUC16	chr19	8980005.0	Missense_Mutation	p.Ser378Arg	ENST00000397910	missense_variant	S/R	agC/agA	MODERATE	SNV
MUC16	chr19	8858592.0	Splice_Region		ENST00000397910	splice_region_variant;intron_variant			LOW	SNV
MUC16	chr19	8917670.0	Missense_Mutation	p.Arg12149His	ENST00000397910	missense_variant	R/H	cGc/cAc	MODERATE	SNV
MUC16	chr19	8958477.0	Frame_Shift_Ins	p.Ser6098TrpfsTer23	ENST00000397910	frameshift_variant	S/WLMCPGSVGQEMSPX	tcc/tGGTTGATGTGTCCAGGGTCAGTTGGCCAAGAGATGTCACCcc	HIGH	insertion
MUC16	chr19	8966882.0	In_Frame_Ins	p.Leu3296_Tyr3297insProLeuSerTyr	ENST00000397910	inframe_insertion	L/LPLSY	ctt/ctGCCATTATCTTAt	MODERATE	insertion
MUC16	chr19	8906678.0	Missense_Mutation	p.Tyr12657Cys	ENST00000397910	missense_variant	Y/C	tAt/tGt	MODERATE	SNV
MUC16	chr19	8975617.0	Missense_Mutation	p.Thr1841Ile	ENST00000397910	missense_variant	T/I	aCc/aTc	MODERATE	SNV
MUC16	chr19	8964937.0	Missense_Mutation	p.His3945Asn	ENST00000397910	missense_variant	H/N	Cac/Aac	MODERATE	SNV
MUC16	chr19	8906322.0	Missense_Mutation	p.Pro12666His	ENST00000397910	missense_variant	P/H	cCt/cAt	MODERATE	SNV
MUC16	chr19	8963417.0	Missense_Mutation	p.Ser4451Arg	ENST00000397910	missense_variant	S/R	agC/agA	MODERATE	SNV
MUC16	chr19	8948195.0	Silent	p.=	ENST00000397910	synonymous_variant	T	acC/acA	LOW	SNV
MUC16	chr19	8956976.0	Silent	p.=	ENST00000397910	synonymous_variant	G	ggG/ggA	LOW	SNV
MUC16	chr19	8963887.0	Missense_Mutation	p.Glu4295Lys	ENST00000397910	missense_variant	E/K	Gag/Aag	MODERATE	SNV
MUC16	chr19	8899972.0	Missense_Mutation	p.Thr13005Ala	ENST00000397910	missense_variant;splice_region_variant	T/A	Aca/Gca	MODERATE	SNV
MUC16	chr19	8950983.0	Missense_Mutation	p.Leu8596Pro	ENST00000397910	missense_variant	L/P	cTt/cCt	MODERATE	SNV
MUC16	chr19	8966228.0	Silent	p.=	ENST00000397910	synonymous_variant	G	ggG/ggA	LOW	SNV
MUC16	chr19	8972005.0	Missense_Mutation	p.Pro3045Leu	ENST00000397910	missense_variant	P/L	cCc/cTc	MODERATE	SNV
MUC16	chr19	8972622.0	Silent	p.=	ENST00000397910	synonymous_variant	A	gcT/gcC	LOW	SNV
MUC16	chr19	8974067.0	Missense_Mutation	p.Arg2358Trp	ENST00000397910	missense_variant	R/W	Cgg/Tgg	MODERATE	SNV
MUC16	chr19	8975985.0	Silent	p.=	ENST00000397910	synonymous_variant	G	ggA/ggG	LOW	SNV
MUC16	chr19	8960200.0	Missense_Mutation	p.Ile5524Val	ENST00000397910	missense_variant	I/V	Atc/Gtc	MODERATE	SNV
MUC16	chr19	8914977.0	Missense_Mutation	p.Lys12267Asn	ENST00000397910	missense_variant	K/N	aaG/aaT	MODERATE	SNV
MUC16	chr19	8974735.0	Missense_Mutation	p.Pro2135His	ENST00000397910	missense_variant	P/H	cCt/cAt	MODERATE	SNV
MUC16	chr19	8979337.0	Missense_Mutation	p.His601Arg	ENST00000397910	missense_variant	H/R	cAt/cGt	MODERATE	SNV
MUC16	chr19	8938529.0	Missense_Mutation	p.Arg10809Gln	ENST00000397910	missense_variant	R/Q	cGa/cAa	MODERATE	SNV
MUC16	chr19	8979371.0	Missense_Mutation	p.Leu590Val	ENST00000397910	missense_variant	L/V	Ctc/Gtc	MODERATE	SNV
MUC16	chr19	8980151.0	Frame_Shift_Del	p.Ser330ProfsTer2	ENST00000397910	frameshift_variant	S/X	Tcc/cc	HIGH	deletion
MUC16	chr19	8974787.0	Missense_Mutation	p.Ala2118Thr	ENST00000397910	missense_variant	A/T	Gcg/Acg	MODERATE	SNV
MUC16	chr19	8959812.0	Missense_Mutation	p.Ile5653Asn	ENST00000397910	missense_variant	I/N	aTc/aAc	MODERATE	SNV
MUC16	chr19	8977671.0	Silent	p.=	ENST00000397910	synonymous_variant	S	tcA/tcG	LOW	SNV
MUC16	chr19	8953634.0	Frame_Shift_Del	p.Ser7713LeufsTer5	ENST00000397910	frameshift_variant	P/X	ccC/cc	HIGH	deletion
MUC16	chr19	8957439.0	Missense_Mutation	p.Thr6444Asn	ENST00000397910	missense_variant	T/N	aCc/aAc	MODERATE	SNV
MUC16	chr19	8980385.0	Missense_Mutation	p.Thr252Pro	ENST00000397910	missense_variant	T/P	Aca/Cca	MODERATE	SNV
MUC16	chr19	8954710.0	Missense_Mutation	p.Thr7354Pro	ENST00000397910	missense_variant	T/P	Acc/Ccc	MODERATE	SNV
MUC16	chr19	8958463.0	Missense_Mutation	p.Asp6103Asn	ENST00000397910	missense_variant	D/N	Gat/Aat	MODERATE	SNV
MUC16	chr19	8969827.0	Silent	p.=	ENST00000397910	synonymous_variant	Q	caA/caG	LOW	SNV
MUC16	chr19	8969828.0	Missense_Mutation	p.Gln3176Leu	ENST00000397910	missense_variant	Q/L	cAa/cTa	MODERATE	SNV
MUC16	chr19	8897162.0	Missense_Mutation	p.Thr13129Ile	ENST00000397910	missense_variant	T/I	aCc/aTc	MODERATE	SNV
MUC16	chr19	8957702.0	Silent	p.=	ENST00000397910	synonymous_variant	I	atT/atA	LOW	SNV
MUC16	chr19	8966828.0	Silent	p.=	ENST00000397910	synonymous_variant	V	gtC/gtA	LOW	SNV
MUC16	chr19	8948481.0	Frame_Shift_Del	p.Asn9430ThrfsTer13	ENST00000397910	frameshift_variant	N/X	aAc/ac	HIGH	deletion
MUC16	chr19	8956959.0	Frame_Shift_Del	p.Lys6604ArgfsTer26	ENST00000397910	frameshift_variant	K/X	aAg/ag	HIGH	deletion
MUC16	chr19	8963625.0	Missense_Mutation	p.Ser4382Tyr	ENST00000397910	missense_variant	S/Y	tCt/tAt	MODERATE	SNV
MUC16	chr19	8978032.0	Missense_Mutation	p.Ala1036Val	ENST00000397910	missense_variant	A/V	gCt/gTt	MODERATE	SNV
MUC16	chr19	8935803.0	Missense_Mutation	p.Val11718Ile	ENST00000397910	missense_variant	V/I	Gta/Ata	MODERATE	SNV
MUC16	chr19	8938979.0	Missense_Mutation	p.Ser10659Leu	ENST00000397910	missense_variant	S/L	tCg/tTg	MODERATE	SNV
MUC16	chr19	8957653.0	Missense_Mutation	p.Thr6373Ala	ENST00000397910	missense_variant	T/A	Acc/Gcc	MODERATE	SNV
MUC16	chr19	8957110.0	Missense_Mutation	p.Asp6554Asn	ENST00000397910	missense_variant	D/N	Gat/Aat	MODERATE	SNV
MUC16	chr19	8977684.0	Missense_Mutation	p.Gly1152Asp	ENST00000397910	missense_variant	G/D	gGc/gAc	MODERATE	SNV
MUC16	chr19	8958467.0	Silent	p.=	ENST00000397910	synonymous_variant	S	tcC/tcA	LOW	SNV
MUC16	chr19	8964260.0	Silent	p.=	ENST00000397910	synonymous_variant	S	tcG/tcA	LOW	SNV
MUC16	chr19	8953404.0	Missense_Mutation	p.Ser7789Tyr	ENST00000397910	missense_variant	S/Y	tCt/tAt	MODERATE	SNV
MUC16	chr19	8955594.0	Missense_Mutation	p.His7059Arg	ENST00000397910	missense_variant	H/R	cAt/cGt	MODERATE	SNV
MUC16	chr19	8963306.0	Silent	p.=	ENST00000397910	synonymous_variant	S	tcT/tcC	LOW	SNV
MUC16	chr19	8965395.0	Missense_Mutation	p.Met3792Lys	ENST00000397910	missense_variant	M/K	aTg/aAg	MODERATE	SNV
MUC16	chr19	8936175.0	Missense_Mutation	p.Asn11594His	ENST00000397910	missense_variant	N/H	Aac/Cac	MODERATE	SNV
MUC16	chr19	8898641.0	Missense_Mutation	p.Lys13052Asn	ENST00000397910	missense_variant	K/N	aaG/aaT	MODERATE	SNV
MUC16	chr19	8957437.0	Missense_Mutation	p.Ile6445Val	ENST00000397910	missense_variant	I/V	Att/Gtt	MODERATE	SNV
MUC16	chr19	8972910.0	Silent	p.=	ENST00000397910	synonymous_variant	S	tcG/tcT	LOW	SNV
MUC16	chr19	8937078.0	Missense_Mutation	p.Pro11293Ser	ENST00000397910	missense_variant	P/S	Cct/Tct	MODERATE	SNV
MUC16	chr19	8960503.0	Missense_Mutation	p.Ala5423Thr	ENST00000397910	missense_variant	A/T	Gca/Aca	MODERATE	SNV
MUC16	chr19	8980573.0	Frame_Shift_Ins	p.Ile189AsnfsTer26	ENST00000397910	frameshift_variant	I/NX	atc/aAtc	HIGH	insertion
MUC16	chr19	8978917.0	Missense_Mutation	p.Ser741Asn	ENST00000397910	missense_variant	S/N	aGc/aAc	MODERATE	SNV
MUC16	chr19	8974047.0	Silent	p.=	ENST00000397910	synonymous_variant	P	ccC/ccA	LOW	SNV
MUC16	chr19	8975124.0	Silent	p.=	ENST00000397910	synonymous_variant	V	gtC/gtA	LOW	SNV
MUC16	chr19	8851319.0	Missense_Mutation	p.Ala14461Val	ENST00000397910	missense_variant	A/V	gCa/gTa	MODERATE	SNV
MUC16	chr19	8907811.0	Missense_Mutation	p.Arg12563Cys	ENST00000397910	missense_variant	R/C	Cgc/Tgc	MODERATE	SNV
MUC16	chr19	8946259.0	Missense_Mutation	p.Lys10171Glu	ENST00000397910	missense_variant	K/E	Aag/Gag	MODERATE	SNV
MUC16	chr19	8937853.0	Silent	p.=	ENST00000397910	synonymous_variant	V	gtT/gtC	LOW	SNV
MUC16	chr19	8978546.0	Nonsense_Mutation	p.Glu865Ter	ENST00000397910	stop_gained	E/*	Gaa/Taa	HIGH	SNV
MUC16	chr19	8954124.0	Missense_Mutation	p.Thr7549Asn	ENST00000397910	missense_variant	T/N	aCc/aAc	MODERATE	SNV
MUC16	chr19	8978169.0	Silent	p.=	ENST00000397910	synonymous_variant	T	acT/acG	LOW	SNV
MUC16	chr19	8955277.0	Missense_Mutation	p.Thr7165Ala	ENST00000397910	missense_variant	T/A	Act/Gct	MODERATE	SNV
MUC16	chr19	8974396.0	Missense_Mutation	p.Pro2248His	ENST00000397910	missense_variant	P/H	cCc/cAc	MODERATE	SNV
MUC16	chr19	8871577.0	Missense_Mutation	p.Pro14008Ser	ENST00000397910	missense_variant	P/S	Cct/Tct	MODERATE	SNV
MUC16	chr19	8952482.0	Silent	p.=	ENST00000397910	synonymous_variant	T	acG/acA	LOW	SNV
MUC16	chr19	8938622.0	Missense_Mutation	p.Ser10778Leu	ENST00000397910	missense_variant	S/L	tCg/tTg	MODERATE	SNV
MUC16	chr19	8957409.0	Missense_Mutation	p.Ala6454Val	ENST00000397910	missense_variant	A/V	gCg/gTg	MODERATE	SNV
MUC16	chr19	8871482.0	Splice_Region	p.=	ENST00000397910	splice_region_variant;synonymous_variant	N	aaC/aaT	LOW	SNV
MUC16	chr19	8889844.0	Silent	p.=	ENST00000397910	synonymous_variant	T	acT/acG	LOW	SNV
MUC16	chr19	8907810.0	Missense_Mutation	p.Arg12563His	ENST00000397910	missense_variant	R/H	cGc/cAc	MODERATE	SNV
MUC16	chr19	8914272.0	Missense_Mutation	p.Arg12305His	ENST00000397910	missense_variant	R/H	cGc/cAc	MODERATE	SNV
MUC16	chr19	8938243.0	Missense_Mutation	p.Glu10904Asp	ENST00000397910	missense_variant	E/D	gaG/gaT	MODERATE	SNV
MUC16	chr19	8943562.0	Missense_Mutation	p.Lys10462Gln	ENST00000397910	missense_variant	K/Q	Aaa/Caa	MODERATE	SNV
MUC16	chr19	8951570.0	Missense_Mutation	p.Phe8400Leu	ENST00000397910	missense_variant	F/L	ttC/ttA	MODERATE	SNV
MUC16	chr19	8953121.0	Silent	p.=	ENST00000397910	synonymous_variant	I	atC/atA	LOW	SNV
MUC16	chr19	8954556.0	Missense_Mutation	p.Ser7405Tyr	ENST00000397910	missense_variant	S/Y	tCt/tAt	MODERATE	SNV
MUC16	chr19	8956585.0	Nonsense_Mutation	p.Glu6729Ter	ENST00000397910	stop_gained	E/*	Gaa/Taa	HIGH	SNV
MUC16	chr19	8957025.0	Missense_Mutation	p.Asp6582Gly	ENST00000397910	missense_variant	D/G	gAt/gGt	MODERATE	SNV
MUC16	chr19	8957490.0	Missense_Mutation	p.Ser6427Tyr	ENST00000397910	missense_variant	S/Y	tCt/tAt	MODERATE	SNV
MUC16	chr19	8958305.0	Silent	p.=	ENST00000397910	synonymous_variant	I	atC/atT	LOW	SNV
MUC16	chr19	8961914.0	Silent	p.=	ENST00000397910	synonymous_variant	I	atC/atA	LOW	SNV
MUC16	chr19	8962837.0	Missense_Mutation	p.Phe4645Val	ENST00000397910	missense_variant	F/V	Ttc/Gtc	MODERATE	SNV
MUC16	chr19	8963287.0	Missense_Mutation	p.Asp4495Tyr	ENST00000397910	missense_variant	D/Y	Gat/Tat	MODERATE	SNV
MUC16	chr19	8964753.0	Missense_Mutation	p.Arg4006Ile	ENST00000397910	missense_variant	R/I	aGa/aTa	MODERATE	SNV
MUC16	chr19	8965441.0	Missense_Mutation	p.Pro3777Ser	ENST00000397910	missense_variant	P/S	Ccc/Tcc	MODERATE	SNV
MUC16	chr19	8965684.0	Missense_Mutation	p.Thr3696Ser	ENST00000397910	missense_variant	T/S	Act/Tct	MODERATE	SNV
MUC16	chr19	8967073.0	Nonsense_Mutation	p.Glu3233Ter	ENST00000397910	stop_gained	E/*	Gaa/Taa	HIGH	SNV
MUC16	chr19	8973309.0	Missense_Mutation	p.Lys2610Asn	ENST00000397910	missense_variant	K/N	aaG/aaT	MODERATE	SNV
MUC16	chr19	8976094.0	Missense_Mutation	p.Gly1682Glu	ENST00000397910	missense_variant	G/E	gGa/gAa	MODERATE	SNV
MUC16	chr19	8977492.0	Missense_Mutation	p.Thr1216Ile	ENST00000397910	missense_variant	T/I	aCc/aTc	MODERATE	SNV
MUC16	chr19	8979596.0	Missense_Mutation	p.Lys515Gln	ENST00000397910	missense_variant	K/Q	Aaa/Caa	MODERATE	SNV
MUC16	chr19	8979931.0	Missense_Mutation	p.Ala403Val	ENST00000397910	missense_variant	A/V	gCg/gTg	MODERATE	SNV
MUC16	chr19	8938427.0	Frame_Shift_Del	p.Phe10843SerfsTer11	ENST00000397910	frameshift_variant	F/X	tTc/tc	HIGH	deletion
MUC16	chr19	8891507.0	Missense_Mutation	p.Thr13441Pro	ENST00000397910	missense_variant	T/P	Acc/Ccc	MODERATE	SNV
MUC16	chr19	8936771.0	Missense_Mutation	p.Thr11395Asn	ENST00000397910	missense_variant	T/N	aCt/aAt	MODERATE	SNV
MUC16	chr19	8937636.0	Missense_Mutation	p.Ala11107Thr	ENST00000397910	missense_variant	A/T	Gca/Aca	MODERATE	SNV
MUC16	chr19	8949798.0	Missense_Mutation	p.Arg8991Ile	ENST00000397910	missense_variant	R/I	aGa/aTa	MODERATE	SNV
MUC16	chr19	8951800.0	Missense_Mutation	p.Asn8324His	ENST00000397910	missense_variant	N/H	Aat/Cat	MODERATE	SNV
MUC16	chr19	8954068.0	Missense_Mutation	p.Thr7568Ala	ENST00000397910	missense_variant	T/A	Act/Gct	MODERATE	SNV
MUC16	chr19	8957007.0	Missense_Mutation	p.Pro6588His	ENST00000397910	missense_variant	P/H	cCt/cAt	MODERATE	SNV
MUC16	chr19	8958438.0	Missense_Mutation	p.Ala6111Glu	ENST00000397910	missense_variant	A/E	gCa/gAa	MODERATE	SNV
MUC16	chr19	8962211.0	Silent	p.=	ENST00000397910	synonymous_variant	E	gaG/gaA	LOW	SNV
MUC16	chr19	8964711.0	Missense_Mutation	p.Val4020Ala	ENST00000397910	missense_variant	V/A	gTc/gCc	MODERATE	SNV
MUC16	chr19	8964978.0	Missense_Mutation	p.Arg3931Ile	ENST00000397910	missense_variant	R/I	aGa/aTa	MODERATE	SNV
MUC16	chr19	8977221.0	Silent	p.=	ENST00000397910	synonymous_variant	E	gaG/gaA	LOW	SNV
MUC16	chr19	8980130.0	Nonsense_Mutation	p.Glu337Ter	ENST00000397910	stop_gained	E/*	Gaa/Taa	HIGH	SNV
MUC16	chr19	8980582.0	Missense_Mutation	p.Pro186His	ENST00000397910	missense_variant	P/H	cCt/cAt	MODERATE	SNV
MUC16	chr19	8896817.0	Missense_Mutation	p.Pro13159Ser	ENST00000397910	missense_variant	P/S	Ccc/Tcc	MODERATE	SNV
MUC16	chr19	8956166.0	Silent	p.=	ENST00000397910	synonymous_variant	L	ctG/ctA	LOW	SNV
MUC16	chr19	8956934.0	Silent	p.=	ENST00000397910	synonymous_variant	A	gcC/gcA	LOW	SNV
MUC16	chr19	8959105.0	Missense_Mutation	p.Thr5889Ser	ENST00000397910	missense_variant	T/S	Act/Tct	MODERATE	SNV
MUC16	chr19	8979222.0	Silent	p.=	ENST00000397910	synonymous_variant	D	gaT/gaC	LOW	SNV
MUC16	chr19	8906793.0	Missense_Mutation	p.Arg12619Cys	ENST00000397910	missense_variant	R/C	Cgt/Tgt	MODERATE	SNV
MUC16	chr19	8980388.0	Missense_Mutation	p.Glu251Lys	ENST00000397910	missense_variant	E/K	Gaa/Aaa	MODERATE	SNV
MUC16	chr19	8851285.0	Silent	p.=	ENST00000397910	synonymous_variant	C	tgC/tgT	LOW	SNV
MUC16	chr19	8938477.0	Silent	p.=	ENST00000397910	synonymous_variant	T	acG/acA	LOW	SNV
MUC16	chr19	8972264.0	Missense_Mutation	p.Thr2959Ser	ENST00000397910	missense_variant	T/S	Act/Tct	MODERATE	SNV
MUC16	chr19	8876548.0	Missense_Mutation	p.Val13955Ile	ENST00000397910	missense_variant	V/I	Gtc/Atc	MODERATE	SNV
MUC16	chr19	8892912.0	Missense_Mutation	p.Thr13351Met	ENST00000397910	missense_variant	T/M	aCg/aTg	MODERATE	SNV
MUC16	chr19	8981324.0	5'UTR		ENST00000397910	5_prime_UTR_variant			MODIFIER	SNV
MUC16	chr19	8868539.0	Splice_Site		ENST00000397910	splice_donor_variant			HIGH	SNV
MUC16	chr19	8896869.0	Nonsense_Mutation	p.Trp13141Ter	ENST00000397910	stop_gained	W/*	tgG/tgA	HIGH	SNV
MUC16	chr19	8935926.0	Missense_Mutation	p.Arg11677Trp	ENST00000397910	missense_variant	R/W	Cgg/Tgg	MODERATE	SNV
MUC16	chr19	8960826.0	Missense_Mutation	p.Gly5315Asp	ENST00000397910	missense_variant	G/D	gGc/gAc	MODERATE	SNV
MUC16	chr19	8961442.0	Missense_Mutation	p.Asp5110Tyr	ENST00000397910	missense_variant	D/Y	Gac/Tac	MODERATE	SNV
MUC16	chr19	8961959.0	Missense_Mutation	p.Ser4937Arg	ENST00000397910	missense_variant	S/R	agT/agG	MODERATE	SNV
MUC16	chr19	8977913.0	Nonsense_Mutation	p.Glu1076Ter	ENST00000397910	stop_gained	E/*	Gaa/Taa	HIGH	SNV
MUC16	chr19	8917569.0	Missense_Mutation	p.Arg12183Trp	ENST00000397910	missense_variant	R/W	Cgg/Tgg	MODERATE	SNV
MUC16	chr19	8956646.0	Silent	p.=	ENST00000397910	synonymous_variant	T	acA/acC	LOW	SNV
MUC16	chr19	8965097.0	Missense_Mutation	p.Glu3891Asp	ENST00000397910	missense_variant	E/D	gaA/gaC	MODERATE	SNV
MUC16	chr19	8898659.0	Splice_Site		ENST00000397910	splice_acceptor_variant			HIGH	SNV
MUC16	chr19	8975058.0	Silent	p.=	ENST00000397910	synonymous_variant	S	tcC/tcA	LOW	SNV
MUC16	chr19	8949565.0	Missense_Mutation	p.Pro9069Thr	ENST00000397910	missense_variant	P/T	Ccc/Acc	MODERATE	SNV
MUC16	chr19	8950403.0	Frame_Shift_Del	p.Thr8791GlnfsTer38	ENST00000397910	frameshift_variant	P/X	ccC/cc	HIGH	deletion
MUC16	chr19	8954993.0	Silent	p.=	ENST00000397910	synonymous_variant	S	tcA/tcG	LOW	SNV
MUC16	chr19	8882845.0	Silent	p.=	ENST00000397910	synonymous_variant	T	acC/acT	LOW	SNV
MUC16	chr19	8889842.0	Missense_Mutation	p.Asn13489Ser	ENST00000397910	missense_variant	N/S	aAc/aGc	MODERATE	SNV
MUC16	chr19	8949816.0	Missense_Mutation	p.Ala8985Val	ENST00000397910	missense_variant	A/V	gCt/gTt	MODERATE	SNV
MUC16	chr19	8955894.0	Missense_Mutation	p.Ser6959Phe	ENST00000397910	missense_variant	S/F	tCc/tTc	MODERATE	SNV
MUC16	chr19	8956472.0	Silent	p.=	ENST00000397910	synonymous_variant	S	tcG/tcA	LOW	SNV
MUC16	chr19	8956709.0	Missense_Mutation	p.Glu6687Asp	ENST00000397910	missense_variant	E/D	gaG/gaT	MODERATE	SNV
MUC16	chr19	8959942.0	Missense_Mutation	p.Arg5610Trp	ENST00000397910	missense_variant	R/W	Cgg/Tgg	MODERATE	SNV
MUC16	chr19	8963486.0	Missense_Mutation	p.Lys4428Asn	ENST00000397910	missense_variant	K/N	aaG/aaT	MODERATE	SNV
MUC16	chr19	8966835.0	Missense_Mutation	p.Ser3312Tyr	ENST00000397910	missense_variant	S/Y	tCc/tAc	MODERATE	SNV
MUC16	chr19	8973866.0	Missense_Mutation	p.Ala2425Thr	ENST00000397910	missense_variant	A/T	Gcc/Acc	MODERATE	SNV
MUC16	chr19	8975439.0	Silent	p.=	ENST00000397910	synonymous_variant	E	gaG/gaA	LOW	SNV
MUC16	chr19	8980065.0	Missense_Mutation	p.Lys358Asn	ENST00000397910	missense_variant	K/N	aaG/aaT	MODERATE	SNV
MUC16	chr19	8980367.0	Silent	p.=	ENST00000397910	synonymous_variant	L	Cta/Tta	LOW	SNV
MUC16	chr19	8979556.0	Missense_Mutation	p.Phe528Cys	ENST00000397910	missense_variant	F/C	tTt/tGt	MODERATE	SNV
MUC16	chr19	8938844.0	Missense_Mutation	p.His10704Arg	ENST00000397910	missense_variant	H/R	cAt/cGt	MODERATE	SNV
MUC16	chr19	8956311.0	Nonsense_Mutation	p.Leu6820Ter	ENST00000397910	stop_gained	L/*	tTa/tAa	HIGH	SNV
MUC16	chr19	8972486.0	Frame_Shift_Ins	p.Ile2885AspfsTer9	ENST00000397910	frameshift_variant	-/X	-/G	HIGH	insertion
MUC16	chr19	8903978.0	Missense_Mutation	p.Arg12774His	ENST00000397910	missense_variant	R/H	cGt/cAt	MODERATE	SNV
MUC16	chr19	8959210.0	Missense_Mutation	p.Thr5854Ser	ENST00000397910	missense_variant	T/S	Aca/Tca	MODERATE	SNV
MUC16	chr19	8951961.0	Missense_Mutation	p.Leu8270Gln	ENST00000397910	missense_variant	L/Q	cTg/cAg	MODERATE	SNV
MUC16	chr19	8951962.0	Frame_Shift_Ins	p.Leu8270TrpfsTer63	ENST00000397910	frameshift_variant	-/WX	-/TGGT	HIGH	insertion
MUC16	chr19	8953699.0	In_Frame_Ins	p.Pro7690_Leu7691insTyrProArgTyr	ENST00000397910	inframe_insertion	-/YPRY	-/TACCCAAGATAT	MODERATE	insertion
MUC16	chr19	8956931.0	Frame_Shift_Ins	p.Ser6614LeufsTer30	ENST00000397910	frameshift_variant	Y/YX	tac/taTc	HIGH	insertion
MUC16	chr19	8956932.0	Nonsense_Mutation	p.Tyr6613LeufsTer2	ENST00000397910	stop_gained;frameshift_variant	Y/L*X	tac/tTGTAac	HIGH	insertion
MUC16	chr19	8958312.0	In_Frame_Ins	p.Lys6153delinsIleIleGlu	ENST00000397910	protein_altering_variant	K/IIE	aag/aTCATTGag	MODERATE	insertion
MUC16	chr19	8958914.0	In_Frame_Ins	p.Thr5952_Ser5953insLeuVal	ENST00000397910	inframe_insertion	T/TLV	act/acATTGGTt	MODERATE	insertion
MUC16	chr19	8962451.0	Frame_Shift_Ins	p.Ser4774PhefsTer12	ENST00000397910	frameshift_variant	V/VX	gtt/gtGTt	HIGH	insertion
MUC16	chr19	8973503.0	Frame_Shift_Ins	p.Leu2546LysfsTer23	ENST00000397910	frameshift_variant	-/KX	-/AAGG	HIGH	insertion
MUC16	chr19	8973504.0	Missense_Mutation	p.His2545Gln	ENST00000397910	missense_variant	H/Q	caT/caA	MODERATE	SNV
MUC16	chr19	8916547.0	Silent	p.=	ENST00000397910	synonymous_variant	S	agC/agT	LOW	SNV
MUC16	chr19	8966676.0	Missense_Mutation	p.Ser3365Tyr	ENST00000397910	missense_variant	S/Y	tCt/tAt	MODERATE	SNV
MUC16	chr19	8973749.0	Missense_Mutation	p.Ala2464Thr	ENST00000397910	missense_variant	A/T	Gcc/Acc	MODERATE	SNV
MUC16	chr19	8975365.0	Missense_Mutation	p.Ser1925Phe	ENST00000397910	missense_variant	S/F	tCc/tTc	MODERATE	SNV
MUC16	chr19	8907830.0	Silent	p.=	ENST00000397910	synonymous_variant	K	aaG/aaA	LOW	SNV
MUC16	chr19	8972332.0	Missense_Mutation	p.Asn2936Thr	ENST00000397910	missense_variant	N/T	aAc/aCc	MODERATE	SNV
MUC16	chr19	8979264.0	Silent	p.=	ENST00000397910	synonymous_variant	H	caC/caT	LOW	SNV
MUC16	chr19	8976812.0	Missense_Mutation	p.Leu1443Met	ENST00000397910	missense_variant	L/M	Ctg/Atg	MODERATE	SNV
MUC16	chr19	8963599.0	Missense_Mutation	p.Thr4391Pro	ENST00000397910	missense_variant	T/P	Aca/Cca	MODERATE	SNV
MUC16	chr19	8949257.0	Silent	p.=	ENST00000397910	synonymous_variant	S	tcG/tcA	LOW	SNV
MUC16	chr19	8978618.0	Missense_Mutation	p.Pro841Ser	ENST00000397910	missense_variant	P/S	Cca/Tca	MODERATE	SNV
MUC16	chr19	8885713.0	Missense_Mutation	p.Ser13728Ile	ENST00000397910	missense_variant	S/I	aGc/aTc	MODERATE	SNV
MUC16	chr19	8885778.0	Silent	p.=	ENST00000397910	synonymous_variant	I	atC/atA	LOW	SNV
MUC16	chr19	8936928.0	Nonsense_Mutation	p.Glu11343Ter	ENST00000397910	stop_gained	E/*	Gaa/Taa	HIGH	SNV
MUC16	chr19	8960234.0	Silent	p.=	ENST00000397910	synonymous_variant	P	ccC/ccA	LOW	SNV
MUC16	chr19	8975719.0	Missense_Mutation	p.Gly1807Glu	ENST00000397910	missense_variant	G/E	gGa/gAa	MODERATE	SNV
MUC16	chr19	8885791.0	Missense_Mutation	p.Gly13702Glu	ENST00000397910	missense_variant	G/E	gGa/gAa	MODERATE	SNV
NEB	chr2	151684877.0	Silent	p.=	ENST00000172853	synonymous_variant	A	gcC/gcT	LOW	SNV
NEB	chr2	151633782.0	Intron		ENST00000172853	intron_variant			MODIFIER	SNV
NEB	chr2	151568357.0	Frame_Shift_Del	p.Leu4198CysfsTer51	ENST00000172853	frameshift_variant	L/X	Ctg/tg	HIGH	deletion
NEB	chr2	151545962.0	Nonsense_Mutation	p.Arg5134Ter	ENST00000172853	stop_gained	R/*	Cga/Tga	HIGH	SNV
NEB	chr2	151733145.0	Silent	p.=	ENST00000172853	synonymous_variant	D	gaC/gaT	LOW	SNV
NEB	chr2	151494161.0	Splice_Region	p.=	ENST00000172853	splice_region_variant;synonymous_variant	S	tcG/tcT	LOW	SNV
NEB	chr2	151518368.0	Missense_Mutation	p.Asp5883Asn	ENST00000172853	missense_variant	D/N	Gat/Aat	MODERATE	SNV
NEB	chr2	151519753.0	Missense_Mutation	p.Asn5798His	ENST00000172853	missense_variant	N/H	Aat/Cat	MODERATE	SNV
NEB	chr2	151534229.0	Missense_Mutation	p.Asp5434Asn	ENST00000172853	missense_variant	D/N	Gac/Aac	MODERATE	SNV
NEB	chr2	151570142.0	Missense_Mutation	p.Thr4089Ile	ENST00000172853	missense_variant	T/I	aCc/aTc	MODERATE	SNV
NEB	chr2	151656412.0	Missense_Mutation	p.Arg2079His	ENST00000172853	missense_variant	R/H	cGc/cAc	MODERATE	SNV
NEB	chr2	151666350.0	Missense_Mutation	p.Leu1591Ile	ENST00000172853	missense_variant	L/I	Ctc/Atc	MODERATE	SNV
NEB	chr2	151672552.0	Missense_Mutation	p.Lys1372Asn	ENST00000172853	missense_variant	K/N	aaG/aaT	MODERATE	SNV
NEB	chr2	151687695.0	Missense_Mutation	p.Lys818Asn	ENST00000172853	missense_variant	K/N	aaG/aaT	MODERATE	SNV
NEB	chr2	151694370.0	Missense_Mutation	p.Asp617Asn	ENST00000172853	missense_variant	D/N	Gat/Aat	MODERATE	SNV
NEB	chr2	151671141.0	Missense_Mutation	p.Ala1463Val	ENST00000172853	missense_variant	A/V	gCa/gTa	MODERATE	SNV
NEB	chr2	151672417.0	Silent	p.=	ENST00000172853	synonymous_variant	D	gaC/gaT	LOW	SNV
NEB	chr2	151659162.0	Missense_Mutation	p.Tyr1993Phe	ENST00000172853	missense_variant	Y/F	tAc/tTc	MODERATE	SNV
NEB	chr2	151546356.0	Missense_Mutation	p.Arg5118Trp	ENST00000172853	missense_variant	R/W	Cgg/Tgg	MODERATE	SNV
NEB	chr2	151570313.0	Missense_Mutation	p.Arg4032Leu	ENST00000172853	missense_variant	R/L	cGc/cTc	MODERATE	SNV
NEB	chr2	151537963.0	Missense_Mutation	p.Glu5303Val	ENST00000172853	missense_variant	E/V	gAg/gTg	MODERATE	SNV
NEB	chr2	151633935.0	Intron		ENST00000172853	intron_variant			MODIFIER	SNV
NEB	chr2	151532098.0	Intron		ENST00000172853	intron_variant			MODIFIER	deletion
NEB	chr2	151618297.0	Frame_Shift_Del	p.Asn3442ThrfsTer4	ENST00000172853	frameshift_variant	N/X	aAc/ac	HIGH	deletion
NEB	chr2	151640634.0	Silent	p.=	ENST00000172853	synonymous_variant	L	ctC/ctT	LOW	SNV
NEB	chr2	151656259.0	Missense_Mutation	p.Ala2130Val	ENST00000172853	missense_variant	A/V	gCc/gTc	MODERATE	SNV
NEB	chr2	151662328.0	Missense_Mutation	p.Ala1926Val	ENST00000172853	missense_variant	A/V	gCt/gTt	MODERATE	SNV
NEB	chr2	151687458.0	Missense_Mutation	p.Lys866Asn	ENST00000172853	missense_variant	K/N	aaG/aaT	MODERATE	SNV
NEB	chr2	151519748.0	Silent	p.=	ENST00000172853	synonymous_variant	F	ttC/ttT	LOW	SNV
NEB	chr2	151568069.0	Splice_Site		ENST00000172853	splice_donor_variant			HIGH	SNV
NEB	chr2	151614516.0	Silent	p.=	ENST00000172853	synonymous_variant	P	ccG/ccA	LOW	SNV
NEB	chr2	151656335.0	Missense_Mutation	p.Asn2105Asp	ENST00000172853	missense_variant	N/D	Aac/Gac	MODERATE	SNV
NEB	chr2	151677699.0	Missense_Mutation	p.Glu1214Lys	ENST00000172853	missense_variant	E/K	Gaa/Aaa	MODERATE	SNV
NEB	chr2	151694421.0	Missense_Mutation	p.Asp600Tyr	ENST00000172853	missense_variant	D/Y	Gac/Tac	MODERATE	SNV
NEB	chr2	151695634.0	Missense_Mutation	p.Pro540Ser	ENST00000172853	missense_variant	P/S	Ccc/Tcc	MODERATE	SNV
NEB	chr2	151485767.0	Missense_Mutation	p.Ala6668Val	ENST00000172853	missense_variant	A/V	gCt/gTt	MODERATE	SNV
NEB	chr2	151492476.0	Missense_Mutation	p.Phe6406Leu	ENST00000172853	missense_variant	F/L	Ttc/Ctc	MODERATE	SNV
NEB	chr2	151694435.0	Missense_Mutation	p.Val595Ala	ENST00000172853	missense_variant;splice_region_variant	V/A	gTg/gCg	MODERATE	SNV
NEB	chr2	151696736.0	Splice_Site		ENST00000172853	splice_acceptor_variant			HIGH	SNV
NEB	chr2	151499432.0	Intron		ENST00000172853	intron_variant			MODIFIER	SNV
NEB	chr2	151553416.0	Silent	p.=	ENST00000172853	synonymous_variant	A	gcT/gcG	LOW	SNV
NEB	chr2	151610039.0	Missense_Mutation	p.Cys3791Arg	ENST00000172853	missense_variant	C/R	Tgt/Cgt	MODERATE	SNV
NEB	chr2	151655281.0	Silent	p.=	ENST00000172853	synonymous_variant	L	Ctg/Ttg	LOW	SNV
NEB	chr2	151692151.0	Missense_Mutation	p.Leu672Val	ENST00000172853	missense_variant	L/V	Tta/Gta	MODERATE	SNV
NEB	chr2	151614283.0	Missense_Mutation	p.Gln3622Arg	ENST00000172853	missense_variant	Q/R	cAg/cGg	MODERATE	SNV
NEB	chr2	151665387.0	Silent	p.=	ENST00000172853	synonymous_variant	A	gcC/gcT	LOW	SNV
NEB	chr2	151627526.0	Silent	p.=	ENST00000172853	synonymous_variant	S	agC/agT	LOW	SNV
NEB	chr2	151524615.0	Missense_Mutation	p.Val5724Ala	ENST00000172853	missense_variant;splice_region_variant	V/A	gTc/gCc	MODERATE	SNV
NEB	chr2	151579454.0	Intron		ENST00000172853	intron_variant			MODIFIER	SNV
NEB	chr2	151665435.0	Missense_Mutation	p.Ser1712Arg	ENST00000172853	missense_variant	S/R	agT/agG	MODERATE	SNV
NEB	chr2	151671155.0	Missense_Mutation	p.Glu1458Asp	ENST00000172853	missense_variant	E/D	gaG/gaT	MODERATE	SNV
NEB	chr2	151678073.0	Missense_Mutation	p.Arg1124Trp	ENST00000172853	missense_variant	R/W	Cgg/Tgg	MODERATE	SNV
NEB	chr2	151723434.0	Missense_Mutation	p.Asn222Thr	ENST00000172853	missense_variant	N/T	aAt/aCt	MODERATE	SNV
NEB	chr2	151727892.0	Missense_Mutation	p.Ile31Met	ENST00000172853	missense_variant	I/M	atT/atG	MODERATE	SNV
NEB	chr2	151692123.0	Missense_Mutation	p.Tyr681Phe	ENST00000172853	missense_variant	Y/F	tAt/tTt	MODERATE	SNV
NEB	chr2	151546442.0	Missense_Mutation	p.Ile5089Thr	ENST00000172853	missense_variant;splice_region_variant	I/T	aTt/aCt	MODERATE	SNV
NEB	chr2	151609981.0	Missense_Mutation	p.Lys3810Arg	ENST00000172853	missense_variant	K/R	aAg/aGg	MODERATE	SNV
NEB	chr2	151610607.0	Missense_Mutation	p.Gly3733Glu	ENST00000172853	missense_variant	G/E	gGa/gAa	MODERATE	SNV
NEB	chr2	151565133.0	Missense_Mutation	p.Thr4427Ser	ENST00000172853	missense_variant	T/S	Aca/Tca	MODERATE	SNV
NEB	chr2	151576239.0	Missense_Mutation	p.Arg3906Gln	ENST00000172853	missense_variant	R/Q	cGg/cAg	MODERATE	SNV
NEB	chr2	151627525.0	Missense_Mutation	p.Asp3138Asn	ENST00000172853	missense_variant;splice_region_variant	D/N	Gat/Aat	MODERATE	SNV
NEB	chr2	151636275.0	Intron		ENST00000172853	intron_variant			MODIFIER	SNV
NEB	chr2	151662282.0	Silent	p.=	ENST00000172853	synonymous_variant	G	ggC/ggA	LOW	SNV
NEB	chr2	151568158.0	Missense_Mutation	p.Trp4218Cys	ENST00000172853	missense_variant	W/C	tgG/tgT	MODERATE	SNV
NEB	chr2	151672387.0	Silent	p.=	ENST00000172853	synonymous_variant	V	gtC/gtA	LOW	SNV
NEB	chr2	151617446.0	Missense_Mutation	p.Asp3457Gly	ENST00000172853	missense_variant	D/G	gAc/gGc	MODERATE	SNV
NEB	chr2	151684830.0	Frame_Shift_Del	p.Pro928LeufsTer29	ENST00000172853	frameshift_variant	P/X	cCt/ct	HIGH	deletion
NEB	chr2	151551792.0	Silent	p.=	ENST00000172853	synonymous_variant	T	acT/acA	LOW	SNV
NEB	chr2	151678047.0	Missense_Mutation	p.Lys1132Asn	ENST00000172853	missense_variant	K/N	aaG/aaT	MODERATE	SNV
NEB	chr2	151498135.0	Intron		ENST00000172853	intron_variant			MODIFIER	SNV
NEB	chr2	151609822.0	Missense_Mutation	p.Asp3863Ala	ENST00000172853	missense_variant	D/A	gAc/gCc	MODERATE	SNV
NEB	chr2	151627676.0	Silent	p.=	ENST00000172853	synonymous_variant	S	agC/agT	LOW	SNV
NEB	chr2	151526948.0	Silent	p.=	ENST00000172853	synonymous_variant	L	ctC/ctT	LOW	SNV
NEB	chr2	151617381.0	Nonsense_Mutation	p.Arg3479Ter	ENST00000172853	stop_gained	R/*	Cga/Tga	HIGH	SNV
NEB	chr2	151633680.0	Intron		ENST00000172853	intron_variant			MODIFIER	SNV
NEB	chr2	151672635.0	Missense_Mutation	p.Gly1345Ser	ENST00000172853	missense_variant	G/S	Ggt/Agt	MODERATE	SNV
NEB	chr2	151671137.0	Silent	p.=	ENST00000172853	synonymous_variant	G	ggC/ggT	LOW	SNV
NEB	chr2	151490400.0	Missense_Mutation	p.Ser6567Arg	ENST00000172853	missense_variant	S/R	agC/agA	MODERATE	SNV
NEB	chr2	151551799.0	Missense_Mutation	p.Ala4927Val	ENST00000172853	missense_variant	A/V	gCt/gTt	MODERATE	SNV
NEB	chr2	151644061.0	Silent	p.=	ENST00000172853	synonymous_variant	D	gaC/gaT	LOW	SNV
NEB	chr2	151672416.0	Missense_Mutation	p.Ala1418Thr	ENST00000172853	missense_variant	A/T	Gcc/Acc	MODERATE	SNV
NEB	chr2	151688376.0	Silent	p.=	ENST00000172853	synonymous_variant	H	caT/caC	LOW	SNV
NEB	chr2	151540785.0	Missense_Mutation	p.Leu5199Pro	ENST00000172853	missense_variant	L/P	cTt/cCt	MODERATE	SNV
NEB	chr2	151553896.0	Missense_Mutation	p.Glu4819Lys	ENST00000172853	missense_variant	E/K	Gaa/Aaa	MODERATE	SNV
NEB	chr2	151625563.0	Missense_Mutation	p.Ala3232Thr	ENST00000172853	missense_variant	A/T	Gca/Aca	MODERATE	SNV
NEB	chr2	151666280.0	Missense_Mutation	p.Tyr1614Cys	ENST00000172853	missense_variant	Y/C	tAc/tGc	MODERATE	SNV
NEB	chr2	151695594.0	Missense_Mutation	p.Ala553Val	ENST00000172853	missense_variant	A/V	gCc/gTc	MODERATE	SNV
NEB	chr2	151533488.0	Intron		ENST00000172853	intron_variant			MODIFIER	SNV
NEB	chr2	151541465.0	Silent	p.=	ENST00000172853	synonymous_variant	G	ggG/ggA	LOW	SNV
NEB	chr2	151560622.0	Silent	p.=	ENST00000172853	synonymous_variant	H	caC/caT	LOW	SNV
NEB	chr2	151650667.0	Silent	p.=	ENST00000172853	synonymous_variant	D	gaC/gaT	LOW	SNV
NEB	chr2	151727833.0	Missense_Mutation	p.Ala51Val	ENST00000172853	missense_variant	A/V	gCt/gTt	MODERATE	SNV
NEB	chr2	151514863.0	Silent	p.=	ENST00000172853	synonymous_variant	T	acG/acA	LOW	SNV
NEB	chr2	151540352.0	Missense_Mutation	p.Ala5261Thr	ENST00000172853	missense_variant	A/T	Gcc/Acc	MODERATE	SNV
NEB	chr2	151633917.0	Intron		ENST00000172853	intron_variant			MODIFIER	SNV
NEB	chr2	151612282.0	Silent	p.=	ENST00000172853	synonymous_variant	R	agG/agA	LOW	SNV
NEB	chr2	151554974.0	Missense_Mutation	p.Pro4761Leu	ENST00000172853	missense_variant	P/L	cCg/cTg	MODERATE	SNV
NEB	chr2	151552671.0	Splice_Site		ENST00000172853	splice_donor_variant			HIGH	SNV
NEB	chr2	151627789.0	Missense_Mutation	p.Gly3050Arg	ENST00000172853	missense_variant	G/R	Gga/Aga	MODERATE	SNV
NEB	chr2	151493376.0	Missense_Mutation	p.Arg6392Cys	ENST00000172853	missense_variant	R/C	Cgc/Tgc	MODERATE	SNV
NEB	chr2	151516497.0	Missense_Mutation	p.Tyr5922His	ENST00000172853	missense_variant	Y/H	Tac/Cac	MODERATE	SNV
NEB	chr2	151490060.0	Missense_Mutation	p.Thr6583Pro	ENST00000172853	missense_variant	T/P	Acc/Ccc	MODERATE	SNV
NEB	chr2	151514353.0	Missense_Mutation	p.Leu5997Ile	ENST00000172853	missense_variant	L/I	Cta/Ata	MODERATE	SNV
NEB	chr2	151526041.0	Missense_Mutation	p.His5659Tyr	ENST00000172853	missense_variant	H/Y	Cac/Tac	MODERATE	SNV
NEB	chr2	151485747.0	3'UTR		ENST00000172853	3_prime_UTR_variant			MODIFIER	insertion
NEB	chr2	151697564.0	Silent	p.=	ENST00000172853	synonymous_variant	L	Ctg/Ttg	LOW	SNV
NEB	chr2	151625537.0	Silent	p.=	ENST00000172853	synonymous_variant	S	agT/agC	LOW	SNV
NEB	chr2	151485650.0	3'UTR		ENST00000172853	3_prime_UTR_variant			MODIFIER	SNV
NEB	chr2	151547694.0	Silent	p.=	ENST00000172853	synonymous_variant	H	caT/caC	LOW	SNV
NEB	chr2	151531040.0	Missense_Mutation	p.Thr5494Ile	ENST00000172853	missense_variant	T/I	aCa/aTa	MODERATE	SNV
NEB	chr2	151579598.0	Intron		ENST00000172853	intron_variant			MODIFIER	SNV
NEB	chr2	151614495.0	Silent	p.=	ENST00000172853	synonymous_variant	H	caT/caC	LOW	SNV
NEB	chr2	151498260.0	Intron		ENST00000172853	intron_variant			MODIFIER	SNV
NEB	chr2	151485923.0	Missense_Mutation	p.Arg6616His	ENST00000172853	missense_variant	R/H	cGt/cAt	MODERATE	SNV
NEB	chr2	151537224.0	Missense_Mutation	p.Glu5338Gln	ENST00000172853	missense_variant	E/Q	Gaa/Caa	MODERATE	SNV
NEB	chr2	151497851.0	Intron		ENST00000172853	intron_variant			MODIFIER	insertion
NEB	chr2	151525981.0	Nonsense_Mutation	p.Glu5679Ter	ENST00000172853	stop_gained	E/*	Gaa/Taa	HIGH	SNV
NEB	chr2	151727828.0	Missense_Mutation	p.Ala53Thr	ENST00000172853	missense_variant	A/T	Gca/Aca	MODERATE	SNV
NEB	chr2	151525986.0	Missense_Mutation	p.Val5677Ala	ENST00000172853	missense_variant	V/A	gTc/gCc	MODERATE	SNV
NEB	chr2	151575776.0	Silent	p.=	ENST00000172853	synonymous_variant	D	gaC/gaT	LOW	SNV
NEB	chr2	151694381.0	Missense_Mutation	p.Ser613Ile	ENST00000172853	missense_variant	S/I	aGc/aTc	MODERATE	SNV
NEB	chr2	151679741.0	Missense_Mutation	p.Ala1079Ser	ENST00000172853	missense_variant	A/S	Gcc/Tcc	MODERATE	SNV
NEB	chr2	151694371.0	Silent	p.=	ENST00000172853	synonymous_variant	D	gaC/gaT	LOW	SNV
NEB	chr2	151551739.0	Missense_Mutation	p.Ser4947Leu	ENST00000172853	missense_variant;splice_region_variant	S/L	tCg/tTg	MODERATE	SNV
NEB	chr2	151526204.0	Missense_Mutation	p.Thr5634Met	ENST00000172853	missense_variant	T/M	aCg/aTg	MODERATE	SNV
NEB	chr2	151492138.0	Missense_Mutation	p.Met6483Ile	ENST00000172853	missense_variant	M/I	atG/atA	MODERATE	SNV
NEB	chr2	151524601.0	Missense_Mutation	p.Asp5729Tyr	ENST00000172853	missense_variant	D/Y	Gat/Tat	MODERATE	SNV
NEB	chr2	151545985.0	Missense_Mutation	p.Tyr5126Cys	ENST00000172853	missense_variant	Y/C	tAc/tGc	MODERATE	SNV
NEB	chr2	151561092.0	Missense_Mutation	p.Asn4672Ser	ENST00000172853	missense_variant	N/S	aAt/aGt	MODERATE	SNV
NEB	chr2	151610576.0	Silent	p.=	ENST00000172853	synonymous_variant	D	gaT/gaC	LOW	SNV
NEB	chr2	151612275.0	Missense_Mutation	p.Arg3663Cys	ENST00000172853	missense_variant	R/C	Cgc/Tgc	MODERATE	SNV
NEB	chr2	151619546.0	Missense_Mutation	p.Asp3350Asn	ENST00000172853	missense_variant	D/N	Gat/Aat	MODERATE	SNV
NEB	chr2	151640450.0	Missense_Mutation	p.Asp2864Asn	ENST00000172853	missense_variant	D/N	Gat/Aat	MODERATE	SNV
NEB	chr2	151640644.0	Missense_Mutation	p.Arg2799His	ENST00000172853	missense_variant	R/H	cGt/cAt	MODERATE	SNV
NEB	chr2	151650265.0	Missense_Mutation	p.Arg2448Cys	ENST00000172853	missense_variant	R/C	Cgt/Tgt	MODERATE	SNV
NEB	chr2	151650748.0	Missense_Mutation	p.Glu2351Asp	ENST00000172853	missense_variant	E/D	gaG/gaT	MODERATE	SNV
NEB	chr2	151656151.0	Splice_Site		ENST00000172853	splice_donor_variant			HIGH	SNV
NEB	chr2	151671042.0	Missense_Mutation	p.Asn1496Ser	ENST00000172853	missense_variant	N/S	aAc/aGc	MODERATE	SNV
NEB	chr2	151531966.0	Intron		ENST00000172853	intron_variant			MODIFIER	SNV
NEB	chr2	151565134.0	Missense_Mutation	p.Glu4426Asp	ENST00000172853	missense_variant	E/D	gaA/gaC	MODERATE	SNV
NEB	chr2	151568616.0	Splice_Site		ENST00000172853	splice_donor_variant			HIGH	SNV
NEB	chr2	151612274.0	Missense_Mutation	p.Arg3663His	ENST00000172853	missense_variant	R/H	cGc/cAc	MODERATE	SNV
NEB	chr2	151662267.0	Missense_Mutation	p.Glu1946Asp	ENST00000172853	missense_variant	E/D	gaG/gaT	MODERATE	SNV
NEB	chr2	151677705.0	Missense_Mutation	p.Asp1212Asn	ENST00000172853	missense_variant	D/N	Gac/Aac	MODERATE	SNV
NEB	chr2	151684812.0	Missense_Mutation	p.Asp934Gly	ENST00000172853	missense_variant	D/G	gAc/gGc	MODERATE	SNV
NEB	chr2	151684965.0	Missense_Mutation	p.Arg883Gln	ENST00000172853	missense_variant	R/Q	cGa/cAa	MODERATE	SNV
NEB	chr2	151691902.0	Missense_Mutation	p.Glu725Lys	ENST00000172853	missense_variant	E/K	Gaa/Aaa	MODERATE	SNV
NEB	chr2	151692356.0	Missense_Mutation	p.Tyr635His	ENST00000172853	missense_variant	Y/H	Tac/Cac	MODERATE	SNV
NEB	chr2	151694408.0	Missense_Mutation	p.Asn604Thr	ENST00000172853	missense_variant	N/T	aAc/aCc	MODERATE	SNV
NEB	chr2	151627121.0	Missense_Mutation	p.Ala3167Ser	ENST00000172853	missense_variant	A/S	Gct/Tct	MODERATE	SNV
NEB	chr2	151679974.0	Missense_Mutation	p.Pro1031Ser	ENST00000172853	missense_variant	P/S	Cca/Tca	MODERATE	SNV
NEB	chr2	151724286.0	Missense_Mutation	p.Val196Ile	ENST00000172853	missense_variant	V/I	Gtt/Att	MODERATE	SNV
NEB	chr2	151724872.0	Silent	p.=	ENST00000172853	synonymous_variant	S	tcG/tcA	LOW	SNV
NEB	chr2	151538228.0	Missense_Mutation	p.Thr5269Lys	ENST00000172853	missense_variant	T/K	aCa/aAa	MODERATE	SNV
NEB	chr2	151553904.0	Missense_Mutation	p.Arg4816His	ENST00000172853	missense_variant	R/H	cGc/cAc	MODERATE	SNV
NEB	chr2	151678027.0	Missense_Mutation	p.Thr1139Met	ENST00000172853	missense_variant	T/M	aCg/aTg	MODERATE	SNV
NEB	chr2	151627616.0	Missense_Mutation	p.Asp3107Glu	ENST00000172853	missense_variant	D/E	gaT/gaG	MODERATE	SNV
NEB	chr2	151650336.0	Missense_Mutation	p.Trp2424Leu	ENST00000172853	missense_variant	W/L	tGg/tTg	MODERATE	SNV
NEB	chr2	151490081.0	Splice_Region		ENST00000172853	splice_region_variant;intron_variant			LOW	deletion
NEB	chr2	151534236.0	Silent	p.=	ENST00000172853	synonymous_variant	T	acC/acT	LOW	SNV
NEB	chr2	151627080.0	Silent	p.=	ENST00000172853	synonymous_variant	P	ccG/ccA	LOW	SNV
NEB	chr2	151687714.0	Missense_Mutation	p.Trp812Leu	ENST00000172853	missense_variant	W/L	tGg/tTg	MODERATE	SNV
NEB	chr2	151694385.0	Missense_Mutation	p.Leu612Phe	ENST00000172853	missense_variant	L/F	Ctc/Ttc	MODERATE	SNV
NEB	chr2	151555035.0	Missense_Mutation	p.Arg4741Trp	ENST00000172853	missense_variant	R/W	Cgg/Tgg	MODERATE	SNV
NEB	chr2	151562609.0	Splice_Site		ENST00000172853	splice_donor_variant			HIGH	SNV
NEB	chr2	151692154.0	Missense_Mutation	p.Asp671Asn	ENST00000172853	missense_variant	D/N	Gac/Aac	MODERATE	SNV
NEB	chr2	151620936.0	Silent	p.=	ENST00000172853	synonymous_variant	R	Cgg/Agg	LOW	SNV
NEB	chr2	151567301.0	Missense_Mutation	p.Ser4307Leu	ENST00000172853	missense_variant	S/L	tCa/tTa	MODERATE	SNV
NEB	chr2	151619714.0	Missense_Mutation	p.Ala3294Pro	ENST00000172853	missense_variant	A/P	Gcc/Ccc	MODERATE	SNV
NEB	chr2	151545957.0	In_Frame_Ins	p.Asp5135_Lys5136insLeuIleAspPhe	ENST00000172853	inframe_insertion	D/DLIDF	gac/gaTTTGATTGACTTc	MODERATE	insertion
NEB	chr2	151666182.0	Missense_Mutation	p.Ala1647Thr	ENST00000172853	missense_variant	A/T	Gcc/Acc	MODERATE	SNV
NEB	chr2	151695630.0	Frame_Shift_Del	p.Pro541LeufsTer16	ENST00000172853	frameshift_variant	P/X	cCt/ct	HIGH	deletion
NEB	chr2	151658048.0	Missense_Mutation	p.Tyr2040His	ENST00000172853	missense_variant	Y/H	Tat/Cat	MODERATE	SNV
NEB	chr2	151576294.0	Missense_Mutation	p.Pro3888Ser	ENST00000172853	missense_variant	P/S	Cct/Tct	MODERATE	SNV
NEB	chr2	151537163.0	Missense_Mutation	p.Leu5358Gln	ENST00000172853	missense_variant	L/Q	cTg/cAg	MODERATE	SNV
NEB	chr2	151691930.0	Frame_Shift_Del	p.Lys715AsnfsTer8	ENST00000172853	frameshift_variant	K/X	aaA/aa	HIGH	deletion
NEB	chr2	151527503.0	Missense_Mutation	p.Lys5572Thr	ENST00000172853	missense_variant	K/T	aAg/aCg	MODERATE	SNV
DNAH5	chr5	13714411.0	Silent	p.=	ENST00000265104	synonymous_variant	P	ccC/ccA	LOW	SNV
DNAH5	chr5	13809188.0	Splice_Site		ENST00000265104	splice_acceptor_variant			HIGH	SNV
DNAH5	chr5	13871736.0	Missense_Mutation	p.Lys1142Asn	ENST00000265104	missense_variant	K/N	aaA/aaT	MODERATE	SNV
DNAH5	chr5	13753370.0	Missense_Mutation	p.Gln3579Lys	ENST00000265104	missense_variant	Q/K	Caa/Aaa	MODERATE	SNV
DNAH5	chr5	13809162.0	Missense_Mutation	p.Arg2545His	ENST00000265104	missense_variant	R/H	cGt/cAt	MODERATE	SNV
DNAH5	chr5	13862706.0	Silent	p.=	ENST00000265104	synonymous_variant	Q	caA/caG	LOW	SNV
DNAH5	chr5	13864514.0	Silent	p.=	ENST00000265104	synonymous_variant	E	gaG/gaA	LOW	SNV
DNAH5	chr5	13867987.0	Silent	p.=	ENST00000265104	synonymous_variant	S	tcT/tcG	LOW	SNV
DNAH5	chr5	13876818.0	Splice_Site		ENST00000265104	splice_acceptor_variant			HIGH	SNV
DNAH5	chr5	13883069.0	Missense_Mutation	p.Lys1003Asn	ENST00000265104	missense_variant	K/N	aaG/aaT	MODERATE	SNV
DNAH5	chr5	13920607.0	Missense_Mutation	p.Arg224Gln	ENST00000265104	missense_variant	R/Q	cGa/cAa	MODERATE	SNV
DNAH5	chr5	13776654.0	Missense_Mutation	p.Ala3053Val	ENST00000265104	missense_variant	A/V	gCa/gTa	MODERATE	SNV
DNAH5	chr5	13901483.0	Silent	p.=	ENST00000265104	synonymous_variant	Y	taT/taC	LOW	SNV
DNAH5	chr5	13830147.0	Missense_Mutation	p.Ser2043Leu	ENST00000265104	missense_variant	S/L	tCg/tTg	MODERATE	SNV
DNAH5	chr5	13882808.0	Missense_Mutation	p.Ile1061Thr	ENST00000265104	missense_variant	I/T	aTa/aCa	MODERATE	SNV
DNAH5	chr5	13692085.0	Nonsense_Mutation	p.Arg4592Ter	ENST00000265104	stop_gained	R/*	Cga/Tga	HIGH	SNV
DNAH5	chr5	13691971.0	Missense_Mutation		ENST00000265104	coding_sequence_variant;3_prime_UTR_variant			MODIFIER	deletion
DNAH5	chr5	13735317.0	Missense_Mutation	p.Val3859Phe	ENST00000265104	missense_variant	V/F	Gtc/Ttc	MODERATE	SNV
DNAH5	chr5	13766163.0	Missense_Mutation	p.Asp3305Gly	ENST00000265104	missense_variant	D/G	gAc/gGc	MODERATE	SNV
DNAH5	chr5	13708309.0	Silent	p.=	ENST00000265104	synonymous_variant	G	ggG/ggA	LOW	SNV
DNAH5	chr5	13735290.0	Missense_Mutation	p.Ile3868Val	ENST00000265104	missense_variant	I/V	Att/Gtt	MODERATE	SNV
DNAH5	chr5	13754211.0	Missense_Mutation	p.Arg3516Ile	ENST00000265104	missense_variant	R/I	aGa/aTa	MODERATE	SNV
DNAH5	chr5	13769546.0	Missense_Mutation	p.Glu3225Asp	ENST00000265104	missense_variant	E/D	gaA/gaC	MODERATE	SNV
DNAH5	chr5	13793943.0	Missense_Mutation	p.Gly2668Glu	ENST00000265104	missense_variant	G/E	gGa/gAa	MODERATE	SNV
DNAH5	chr5	13867947.0	Missense_Mutation	p.Glu1294Lys	ENST00000265104	missense_variant	E/K	Gaa/Aaa	MODERATE	SNV
DNAH5	chr5	13920485.0	Missense_Mutation	p.Glu265Lys	ENST00000265104	missense_variant	E/K	Gaa/Aaa	MODERATE	SNV
DNAH5	chr5	13928138.0	Missense_Mutation	p.Arg78Gln	ENST00000265104	missense_variant	R/Q	cGa/cAa	MODERATE	SNV
DNAH5	chr5	13811768.0	Missense_Mutation	p.Thr2429Ile	ENST00000265104	missense_variant	T/I	aCc/aTc	MODERATE	SNV
DNAH5	chr5	13865850.0	Silent	p.=	ENST00000265104	synonymous_variant	L	ctT/ctC	LOW	SNV
DNAH5	chr5	13839462.0	Nonsense_Mutation	p.Glu1926Ter	ENST00000265104	stop_gained	E/*	Gaa/Taa	HIGH	SNV
DNAH5	chr5	13692129.0	Missense_Mutation	p.Arg4577Gln	ENST00000265104	missense_variant	R/Q	cGa/cAa	MODERATE	SNV
DNAH5	chr5	13752231.0	Missense_Mutation	p.Gly3644Glu	ENST00000265104	missense_variant	G/E	gGa/gAa	MODERATE	SNV
DNAH5	chr5	13823331.0	Missense_Mutation	p.Asp2207Tyr	ENST00000265104	missense_variant	D/Y	Gat/Tat	MODERATE	SNV
DNAH5	chr5	13844992.0	Missense_Mutation	p.Tyr1706His	ENST00000265104	missense_variant;splice_region_variant	Y/H	Tac/Cac	MODERATE	SNV
DNAH5	chr5	13919188.0	Silent	p.=	ENST00000265104	synonymous_variant	S	tcG/tcA	LOW	SNV
DNAH5	chr5	13931142.0	Missense_Mutation	p.Glu54Lys	ENST00000265104	missense_variant	E/K	Gaa/Aaa	MODERATE	SNV
DNAH5	chr5	13753448.0	Missense_Mutation	p.Arg3553Trp	ENST00000265104	missense_variant	R/W	Cgg/Tgg	MODERATE	SNV
DNAH5	chr5	13862658.0	Silent	p.=	ENST00000265104	synonymous_variant	F	ttC/ttT	LOW	SNV
DNAH5	chr5	13708308.0	Missense_Mutation	p.Pro4385Ser	ENST00000265104	missense_variant	P/S	Cca/Tca	MODERATE	SNV
DNAH5	chr5	13737479.0	Missense_Mutation	p.Arg3743Ile	ENST00000265104	missense_variant	R/I	aGa/aTa	MODERATE	SNV
DNAH5	chr5	13867839.0	Missense_Mutation	p.Glu1330Lys	ENST00000265104	missense_variant	E/K	Gag/Aag	MODERATE	SNV
DNAH5	chr5	13885222.0	Missense_Mutation	p.Arg917Ile	ENST00000265104	missense_variant	R/I	aGa/aTa	MODERATE	SNV
DNAH5	chr5	13714441.0	Missense_Mutation	p.Met4363Ile	ENST00000265104	missense_variant	M/I	atG/atT	MODERATE	SNV
DNAH5	chr5	13810163.0	Missense_Mutation	p.Arg2502His	ENST00000265104	missense_variant	R/H	cGc/cAc	MODERATE	SNV
DNAH5	chr5	13883022.0	Missense_Mutation	p.Pro1019His	ENST00000265104	missense_variant	P/H	cCc/cAc	MODERATE	SNV
DNAH5	chr5	13862731.0	Missense_Mutation	p.Ala1538Val	ENST00000265104	missense_variant	A/V	gCg/gTg	MODERATE	SNV
DNAH5	chr5	13700753.0	Missense_Mutation	p.Gly4537Asp	ENST00000265104	missense_variant	G/D	gGc/gAc	MODERATE	SNV
DNAH5	chr5	13841735.0	Missense_Mutation	p.Thr1814Ile	ENST00000265104	missense_variant	T/I	aCa/aTa	MODERATE	SNV
DNAH5	chr5	13786273.0	Missense_Mutation	p.Arg2909His	ENST00000265104	missense_variant	R/H	cGt/cAt	MODERATE	SNV
DNAH5	chr5	13917170.0	Missense_Mutation	p.Cys354Trp	ENST00000265104	missense_variant	C/W	tgT/tgG	MODERATE	SNV
DNAH5	chr5	13716567.0	Missense_Mutation	p.Phe4277Leu	ENST00000265104	missense_variant	F/L	Ttt/Ctt	MODERATE	SNV
DNAH5	chr5	13810184.0	Missense_Mutation	p.Ala2495Val	ENST00000265104	missense_variant	A/V	gCg/gTg	MODERATE	SNV
DNAH5	chr5	13766130.0	Frame_Shift_Del	p.Pro3316LeufsTer22	ENST00000265104	frameshift_variant	P/X	cCt/ct	HIGH	deletion
DNAH5	chr5	13830731.0	Frame_Shift_Del	p.Gly1976GlufsTer78	ENST00000265104	frameshift_variant	G/X	gGa/ga	HIGH	deletion
DNAH5	chr5	13776577.0	Nonsense_Mutation	p.Arg3079Ter	ENST00000265104	stop_gained	R/*	Cga/Tga	HIGH	SNV
DNAH5	chr5	13916384.0	Silent	p.=	ENST00000265104	synonymous_variant	Y	taT/taC	LOW	SNV
DNAH5	chr5	13841066.0	Missense_Mutation	p.Lys1850Thr	ENST00000265104	missense_variant	K/T	aAg/aCg	MODERATE	SNV
DNAH5	chr5	13692016.0	Missense_Mutation	p.Arg4615Cys	ENST00000265104	missense_variant	R/C	Cgt/Tgt	MODERATE	SNV
DNAH5	chr5	13823310.0	Missense_Mutation	p.Leu2214Met	ENST00000265104	missense_variant	L/M	Ctg/Atg	MODERATE	SNV
DNAH5	chr5	13885022.0	Missense_Mutation	p.Arg984Cys	ENST00000265104	missense_variant	R/C	Cgt/Tgt	MODERATE	SNV
DNAH5	chr5	13717456.0	Silent	p.=	ENST00000265104	synonymous_variant	V	gtG/gtC	LOW	SNV
DNAH5	chr5	13721150.0	Silent	p.=	ENST00000265104	synonymous_variant	T	acG/acA	LOW	SNV
DNAH5	chr5	13870945.0	Missense_Mutation	p.Arg1219His	ENST00000265104	missense_variant	R/H	cGc/cAc	MODERATE	SNV
DNAH5	chr5	13864633.0	Nonsense_Mutation	p.Arg1454Ter	ENST00000265104	stop_gained	R/*	Cga/Tga	HIGH	SNV
DNAH5	chr5	13735860.0	Missense_Mutation	p.Ser3843Leu	ENST00000265104	missense_variant	S/L	tCg/tTg	MODERATE	SNV
DNAH5	chr5	13776525.0	Missense_Mutation	p.Arg3096Gln	ENST00000265104	missense_variant	R/Q	cGa/cAa	MODERATE	SNV
DNAH5	chr5	13919274.0	Frame_Shift_Del	p.Arg293AspfsTer12	ENST00000265104	frameshift_variant	R/X	Aga/ga	HIGH	deletion
DNAH5	chr5	13721067.0	Missense_Mutation	p.Arg4071His	ENST00000265104	missense_variant	R/H	cGt/cAt	MODERATE	SNV
DNAH5	chr5	13770766.0	Silent	p.=	ENST00000265104	synonymous_variant	V	gtG/gtA	LOW	SNV
DNAH5	chr5	13867920.0	Missense_Mutation	p.His1303Tyr	ENST00000265104	missense_variant	H/Y	Cac/Tac	MODERATE	SNV
DNAH5	chr5	13944475.0	5'UTR		ENST00000265104	5_prime_UTR_variant			MODIFIER	SNV
DNAH5	chr5	13817652.0	Missense_Mutation	p.Ala2295Val	ENST00000265104	missense_variant	A/V	gCg/gTg	MODERATE	SNV
DNAH5	chr5	13839489.0	Missense_Mutation	p.Leu1917Val	ENST00000265104	missense_variant	L/V	Ctg/Gtg	MODERATE	SNV
DNAH5	chr5	13708185.0	Missense_Mutation	p.Glu4426Lys	ENST00000265104	missense_variant	E/K	Gaa/Aaa	MODERATE	SNV
DNAH5	chr5	13753447.0	Missense_Mutation	p.Arg3553Gln	ENST00000265104	missense_variant	R/Q	cGg/cAg	MODERATE	SNV
DNAH5	chr5	13721077.0	Frame_Shift_Del	p.Ile4068Ter	ENST00000265104	frameshift_variant	I/X	Ata/ta	HIGH	deletion
DNAH5	chr5	13776517.0	Frame_Shift_Del	p.Arg3098SerfsTer14	ENST00000265104	frameshift_variant	RA/SX	agAGct/agct	HIGH	deletion
DNAH5	chr5	13839376.0	Silent	p.=	ENST00000265104	synonymous_variant	V	gtA/gtG	LOW	SNV
DNAH5	chr5	13793622.0	Missense_Mutation	p.Met2706Thr	ENST00000265104	missense_variant	M/T	aTg/aCg	MODERATE	SNV
DNAH5	chr5	13911385.0	Splice_Site		ENST00000265104	splice_donor_variant			HIGH	SNV
DNAH5	chr5	13911487.0	Missense_Mutation	p.Val515Leu	ENST00000265104	missense_variant	V/L	Gtg/Ttg	MODERATE	SNV
DNAH5	chr5	13885156.0	Missense_Mutation	p.Thr939Met	ENST00000265104	missense_variant	T/M	aCg/aTg	MODERATE	SNV
DNAH5	chr5	13824222.0	Missense_Mutation	p.Arg2186Trp	ENST00000265104	missense_variant	R/W	Cgg/Tgg	MODERATE	SNV
DNAH5	chr5	13692102.0	Missense_Mutation	p.Ile4586Thr	ENST00000265104	missense_variant	I/T	aTc/aCc	MODERATE	SNV
DNAH5	chr5	13701317.0	Frame_Shift_Del	p.Phe4486LeufsTer7	ENST00000265104	frameshift_variant	F/X	ttT/tt	HIGH	deletion
DNAH5	chr5	13865841.0	Silent	p.=	ENST00000265104	synonymous_variant	L	ctG/ctA	LOW	SNV
DNAH5	chr5	13850761.0	Missense_Mutation	p.Ala1669Thr	ENST00000265104	missense_variant	A/T	Gca/Aca	MODERATE	SNV
DNAH5	chr5	13883046.0	Missense_Mutation	p.Arg1011Gln	ENST00000265104	missense_variant	R/Q	cGg/cAg	MODERATE	SNV
DNAH5	chr5	13864574.0	Silent	p.=	ENST00000265104	synonymous_variant	I	atT/atC	LOW	SNV
DNAH5	chr5	13692120.0	Missense_Mutation	p.Arg4580Gln	ENST00000265104	missense_variant	R/Q	cGg/cAg	MODERATE	SNV
DNAH5	chr5	13864593.0	Frame_Shift_Del	p.Leu1467TrpfsTer3	ENST00000265104	frameshift_variant	L/X	tTg/tg	HIGH	deletion
DNAH5	chr5	13841052.0	Frame_Shift_Del	p.Ile1855SerfsTer16	ENST00000265104	frameshift_variant	I/X	Atc/tc	HIGH	deletion
DNAH5	chr5	13735924.0	Missense_Mutation	p.Arg3822Trp	ENST00000265104	missense_variant	R/W	Cgg/Tgg	MODERATE	SNV
DNAH5	chr5	13920537.0	Silent	p.=	ENST00000265104	synonymous_variant	P	ccT/ccC	LOW	SNV
DNAH5	chr5	13870825.0	Missense_Mutation	p.Ala1259Val	ENST00000265104	missense_variant	A/V	gCg/gTg	MODERATE	SNV
DNAH5	chr5	13928154.0	Frame_Shift_Ins	p.Ala73CysfsTer37	ENST00000265104	frameshift_variant	-/X	-/T	HIGH	insertion
DNAH5	chr5	13758956.0	Missense_Mutation	p.His3437Asn	ENST00000265104	missense_variant	H/N	Cat/Aat	MODERATE	SNV
DNAH5	chr5	13708239.0	Missense_Mutation	p.Arg4408Cys	ENST00000265104	missense_variant	R/C	Cgc/Tgc	MODERATE	SNV
DNAH5	chr5	13770833.0	Missense_Mutation	p.Thr3174Met	ENST00000265104	missense_variant	T/M	aCg/aTg	MODERATE	SNV
DNAH5	chr5	13718893.0	Missense_Mutation	p.Arg4163Ile	ENST00000265104	missense_variant	R/I	aGa/aTa	MODERATE	SNV
DNAH5	chr5	13737427.0	Silent	p.=	ENST00000265104	synonymous_variant	L	ctA/ctC	LOW	SNV
DNAH5	chr5	13770799.0	Silent	p.=	ENST00000265104	synonymous_variant	Y	taT/taC	LOW	SNV
DNAH5	chr5	13865680.0	Missense_Mutation	p.Glu1448Ala	ENST00000265104	missense_variant	E/A	gAa/gCa	MODERATE	SNV
DNAH5	chr5	13876757.0	Missense_Mutation	p.Lys1108Thr	ENST00000265104	missense_variant	K/T	aAg/aCg	MODERATE	SNV
DNAH5	chr5	13882814.0	Missense_Mutation	p.Lys1059Arg	ENST00000265104	missense_variant;splice_region_variant	K/R	aAa/aGa	MODERATE	SNV
DNAH5	chr5	13911397.0	Missense_Mutation	p.Asn545His	ENST00000265104	missense_variant	N/H	Aat/Cat	MODERATE	SNV
DNAH5	chr5	13922180.0	Missense_Mutation	p.Arg196His	ENST00000265104	missense_variant	R/H	cGc/cAc	MODERATE	SNV
DNAH5	chr5	13885151.0	Missense_Mutation	p.Val941Phe	ENST00000265104	missense_variant	V/F	Gtc/Ttc	MODERATE	SNV
DNAH5	chr5	13786274.0	Missense_Mutation	p.Arg2909Cys	ENST00000265104	missense_variant	R/C	Cgt/Tgt	MODERATE	SNV
DNAH5	chr5	13719007.0	Missense_Mutation	p.Ala4125Val	ENST00000265104	missense_variant	A/V	gCg/gTg	MODERATE	SNV
DNAH5	chr5	13721203.0	Missense_Mutation	p.Glu4026Lys	ENST00000265104	missense_variant	E/K	Gaa/Aaa	MODERATE	SNV
DNAH5	chr5	13830704.0	Missense_Mutation	p.Gly1985Asp	ENST00000265104	missense_variant	G/D	gGc/gAc	MODERATE	SNV
DNAH5	chr5	13766114.0	Silent	p.=	ENST00000265104	synonymous_variant	R	cgG/cgT	LOW	SNV
DNAH5	chr5	13841064.0	Missense_Mutation	p.Phe1851Leu	ENST00000265104	missense_variant	F/L	Ttt/Ctt	MODERATE	SNV
DNAH5	chr5	13718981.0	Missense_Mutation	p.Ala4134Ser	ENST00000265104	missense_variant	A/S	Gct/Tct	MODERATE	SNV
DNAH5	chr5	13766136.0	Missense_Mutation	p.Arg3314Pro	ENST00000265104	missense_variant	R/P	cGc/cCc	MODERATE	SNV
DNAH5	chr5	13919298.0	Missense_Mutation	p.Ala285Thr	ENST00000265104	missense_variant	A/T	Gcg/Acg	MODERATE	SNV
DNAH5	chr5	13701327.0	Missense_Mutation	p.Thr4483Met	ENST00000265104	missense_variant	T/M	aCg/aTg	MODERATE	SNV
DNAH5	chr5	13770880.0	Missense_Mutation	p.Glu3158Asp	ENST00000265104	missense_variant	E/D	gaG/gaT	MODERATE	SNV
DNAH5	chr5	13807700.0	Missense_Mutation	p.Gly2593Glu	ENST00000265104	missense_variant	G/E	gGa/gAa	MODERATE	SNV
DNAH5	chr5	13876768.0	Missense_Mutation	p.Lys1104Asn	ENST00000265104	missense_variant	K/N	aaG/aaT	MODERATE	SNV
DNAH5	chr5	13900258.0	Missense_Mutation	p.Thr736Asn	ENST00000265104	missense_variant	T/N	aCt/aAt	MODERATE	SNV
DNAH5	chr5	13769516.0	Silent	p.=	ENST00000265104	synonymous_variant	N	aaC/aaT	LOW	SNV
DNAH5	chr5	13776531.0	Missense_Mutation	p.Lys3094Thr	ENST00000265104	missense_variant	K/T	aAa/aCa	MODERATE	SNV
DNAH5	chr5	13876751.0	Missense_Mutation	p.Val1110Ala	ENST00000265104	missense_variant	V/A	gTt/gCt	MODERATE	SNV
DNAH5	chr5	13810194.0	Missense_Mutation	p.Ala2492Thr	ENST00000265104	missense_variant	A/T	Gcg/Acg	MODERATE	SNV
DNAH5	chr5	13780948.0	Frame_Shift_Ins	p.Ile2945ArgfsTer76	ENST00000265104	frameshift_variant	V/VREMX	gtc/gtAAGAGAAATGc	HIGH	insertion
DNAH5	chr5	13700758.0	Silent	p.=	ENST00000265104	synonymous_variant	V	gtC/gtT	LOW	SNV
DNAH5	chr5	13753246.0	Missense_Mutation	p.Arg3620Gln	ENST00000265104	missense_variant	R/Q	cGa/cAa	MODERATE	SNV
DNAH5	chr5	13776465.0	Missense_Mutation	p.Arg3116Gln	ENST00000265104	missense_variant	R/Q	cGa/cAa	MODERATE	SNV
DNAH5	chr5	13776466.0	Nonsense_Mutation	p.Arg3116Ter	ENST00000265104	stop_gained	R/*	Cga/Tga	HIGH	SNV
DNAH5	chr5	13830169.0	Missense_Mutation	p.Arg2036Cys	ENST00000265104	missense_variant	R/C	Cgt/Tgt	MODERATE	SNV
DNAH5	chr5	13717461.0	Missense_Mutation	p.Ala4187Thr	ENST00000265104	missense_variant	A/T	Gca/Aca	MODERATE	SNV
DNAH5	chr5	13735306.0	Silent	p.=	ENST00000265104	synonymous_variant	P	ccG/ccA	LOW	SNV
DNAH2	chr17	7743025.0	Missense_Mutation	p.Arg596Gln	ENST00000389173	missense_variant	R/Q	cGa/cAa	MODERATE	SNV
DNAH2	chr17	7786135.0	Silent	p.=	ENST00000389173	synonymous_variant	T	acC/acT	LOW	SNV
DNAH2	chr17	7792736.0	Missense_Mutation	p.Gln2409Lys	ENST00000389173	missense_variant	Q/K	Cag/Aag	MODERATE	SNV
DNAH2	chr17	7764132.0	Silent	p.=	ENST00000389173	synonymous_variant	P	ccG/ccA	LOW	SNV
DNAH2	chr17	7778358.0	Silent	p.=	ENST00000389173	synonymous_variant	T	acC/acT	LOW	SNV
DNAH2	chr17	7796583.0	Silent	p.=	ENST00000389173	synonymous_variant	T	acC/acT	LOW	SNV
DNAH2	chr17	7819050.0	Missense_Mutation	p.Asp3601Gly	ENST00000389173	missense_variant	D/G	gAc/gGc	MODERATE	SNV
DNAH2	chr17	7831422.0	Missense_Mutation	p.Lys4164Asn	ENST00000389173	missense_variant	K/N	aaG/aaT	MODERATE	SNV
DNAH2	chr17	7768008.0	Missense_Mutation	p.Thr1262Ala	ENST00000389173	missense_variant	T/A	Acc/Gcc	MODERATE	SNV
DNAH2	chr17	7765417.0	Silent	p.=	ENST00000389173	synonymous_variant	N	aaC/aaT	LOW	SNV
DNAH2	chr17	7792763.0	Missense_Mutation	p.Val2418Met	ENST00000389173	missense_variant	V/M	Gtg/Atg	MODERATE	SNV
DNAH2	chr17	7832920.0	Frame_Shift_Del	p.Lys4326ArgfsTer84	ENST00000389173	frameshift_variant	P/X	Ccc/cc	HIGH	deletion
DNAH2	chr17	7775289.0	Missense_Mutation	p.Asp1590Asn	ENST00000389173	missense_variant	D/N	Gac/Aac	MODERATE	SNV
DNAH2	chr17	7760846.0	Missense_Mutation	p.Glu964Asp	ENST00000389173	missense_variant	E/D	gaG/gaT	MODERATE	SNV
DNAH2	chr17	7819224.0	Missense_Mutation	p.Ala3611Thr	ENST00000389173	missense_variant	A/T	Gcc/Acc	MODERATE	SNV
DNAH2	chr17	7765517.0	Missense_Mutation	p.Asp1155Tyr	ENST00000389173	missense_variant	D/Y	Gac/Tac	MODERATE	SNV
DNAH2	chr17	7774855.0	Missense_Mutation	p.Arg1533His	ENST00000389173	missense_variant	R/H	cGc/cAc	MODERATE	SNV
DNAH2	chr17	7786151.0	Nonsense_Mutation	p.Arg2053Ter	ENST00000389173	stop_gained	R/*	Cga/Tga	HIGH	SNV
DNAH2	chr17	7737173.0	Missense_Mutation	p.Pro362His	ENST00000389173	missense_variant	P/H	cCt/cAt	MODERATE	SNV
DNAH2	chr17	7818091.0	Missense_Mutation	p.Arg3461Gln	ENST00000389173	missense_variant	R/Q	cGa/cAa	MODERATE	SNV
DNAH2	chr17	7797413.0	Missense_Mutation	p.Arg2655Trp	ENST00000389173	missense_variant	R/W	Cgg/Tgg	MODERATE	SNV
DNAH2	chr17	7832892.0	Silent	p.=	ENST00000389173	synonymous_variant	S	tcC/tcT	LOW	SNV
DNAH2	chr17	7830416.0	Frame_Shift_Del	p.Leu3992ThrfsTer2	ENST00000389173	frameshift_variant	SV/SX	tcTGtg/tctg	HIGH	deletion
DNAH2	chr17	7739757.0	Missense_Mutation	p.Ala399Thr	ENST00000389173	missense_variant	A/T	Gcc/Acc	MODERATE	SNV
DNAH2	chr17	7830441.0	Missense_Mutation	p.Leu3999Met	ENST00000389173	missense_variant	L/M	Ctg/Atg	MODERATE	SNV
DNAH2	chr17	7727256.0	Frame_Shift_Del	p.Phe122LeufsTer3	ENST00000389173	frameshift_variant	C/X	tgT/tg	HIGH	deletion
DNAH2	chr17	7737193.0	Missense_Mutation	p.Arg369Cys	ENST00000389173	missense_variant	R/C	Cgc/Tgc	MODERATE	SNV
DNAH2	chr17	7832867.0	Missense_Mutation	p.Ser4306Asn	ENST00000389173	missense_variant	S/N	aGc/aAc	MODERATE	SNV
DNAH2	chr17	7792048.0	Silent	p.=	ENST00000389173	synonymous_variant	I	atC/atT	LOW	SNV
DNAH2	chr17	7786259.0	Missense_Mutation	p.Gly2089Ser	ENST00000389173	missense_variant	G/S	Ggc/Agc	MODERATE	SNV
DNAH2	chr17	7777496.0	Missense_Mutation	p.Lys1703Asn	ENST00000389173	missense_variant	K/N	aaG/aaT	MODERATE	SNV
DNAH2	chr17	7817324.0	Missense_Mutation	p.Asp3310Gly	ENST00000389173	missense_variant	D/G	gAc/gGc	MODERATE	SNV
DNAH2	chr17	7737238.0	Missense_Mutation	p.Leu384Val	ENST00000389173	missense_variant	L/V	Ctg/Gtg	MODERATE	SNV
DNAH2	chr17	7817999.0	Silent	p.=	ENST00000389173	synonymous_variant	H	caC/caT	LOW	SNV
DNAH2	chr17	7832639.0	Frame_Shift_Del	p.Gln4263SerfsTer13	ENST00000389173	frameshift_variant	Q/X	Cag/ag	HIGH	deletion
DNAH2	chr17	7792688.0	Missense_Mutation	p.Val2393Ile	ENST00000389173	missense_variant	V/I	Gtc/Atc	MODERATE	SNV
DNAH2	chr17	7786938.0	Missense_Mutation	p.Val2170Met	ENST00000389173	missense_variant	V/M	Gtg/Atg	MODERATE	SNV
DNAH2	chr17	7733201.0	Missense_Mutation	p.Leu172Phe	ENST00000389173	missense_variant	L/F	Ctt/Ttt	MODERATE	SNV
DNAH2	chr17	7743073.0	Missense_Mutation	p.Arg612Gln	ENST00000389173	missense_variant	R/Q	cGg/cAg	MODERATE	SNV
DNAH2	chr17	7792278.0	Frame_Shift_Del	p.Ile2363TyrfsTer40	ENST00000389173	frameshift_variant	D/X	gaC/ga	HIGH	deletion
DNAH2	chr17	7734253.0	Silent	p.=	ENST00000389173	synonymous_variant	E	gaG/gaA	LOW	SNV
DNAH2	chr17	7766446.0	Nonsense_Mutation	p.Gln1214Ter	ENST00000389173	stop_gained	Q/*	Cag/Tag	HIGH	SNV
DNAH2	chr17	7817665.0	Silent	p.=	ENST00000389173	synonymous_variant	D	gaC/gaT	LOW	SNV
DNAH2	chr17	7758626.0	Missense_Mutation	p.Thr728Met	ENST00000389173	missense_variant	T/M	aCg/aTg	MODERATE	SNV
DNAH2	chr17	7833119.0	Missense_Mutation	p.Arg4343Trp	ENST00000389173	missense_variant	R/W	Cgg/Tgg	MODERATE	SNV
DNAH2	chr17	7804302.0	Missense_Mutation	p.Leu3007Val	ENST00000389173	missense_variant	L/V	Ctg/Gtg	MODERATE	SNV
DNAH2	chr17	7754930.0	Intron		ENST00000389173	intron_variant			MODIFIER	SNV
DNAH2	chr17	7759462.0	Missense_Mutation	p.Arg830His	ENST00000389173	missense_variant	R/H	cGc/cAc	MODERATE	SNV
DNAH2	chr17	7817666.0	Missense_Mutation	p.Ala3376Thr	ENST00000389173	missense_variant	A/T	Gcc/Acc	MODERATE	SNV
DNAH2	chr17	7780751.0	Missense_Mutation	p.Arg1991His	ENST00000389173	missense_variant	R/H	cGc/cAc	MODERATE	SNV
DNAH2	chr17	7757133.0	Silent	p.=	ENST00000389173	synonymous_variant	R	cgG/cgA	LOW	SNV
DNAH2	chr17	7831156.0	Missense_Mutation	p.Leu4101Val	ENST00000389173	missense_variant	L/V	Tta/Gta	MODERATE	SNV
DNAH2	chr17	7765555.0	Silent	p.=	ENST00000389173	synonymous_variant	F	ttC/ttT	LOW	SNV
DNAH2	chr17	7776816.0	Missense_Mutation	p.Asp1662Gly	ENST00000389173	missense_variant	D/G	gAt/gGt	MODERATE	SNV
DNAH2	chr17	7833186.0	Missense_Mutation	p.Phe4365Ser	ENST00000389173	missense_variant	F/S	tTc/tCc	MODERATE	SNV
DNAH2	chr17	7786290.0	Missense_Mutation	p.Ala2099Val	ENST00000389173	missense_variant	A/V	gCc/gTc	MODERATE	SNV
DNAH2	chr17	7766378.0	Missense_Mutation	p.Ala1191Gly	ENST00000389173	missense_variant	A/G	gCc/gGc	MODERATE	SNV
DNAH2	chr17	7764012.0	Missense_Mutation	p.Leu1054Met	ENST00000389173	missense_variant	L/M	Ctg/Atg	MODERATE	SNV
DNAH2	chr17	7779282.0	Missense_Mutation	p.Asn1861Asp	ENST00000389173	missense_variant	N/D	Aac/Gac	MODERATE	SNV
DNAH2	chr17	7743279.0	Intron		ENST00000389173	intron_variant			MODIFIER	deletion
DNAH2	chr17	7831508.0	Missense_Mutation	p.Ile4193Ser	ENST00000389173	missense_variant	I/S	aTc/aGc	MODERATE	SNV
DNAH2	chr17	7831683.0	Missense_Mutation	p.Lys4212Gln	ENST00000389173	missense_variant	K/Q	Aaa/Caa	MODERATE	SNV
DNAH2	chr17	7740928.0	Missense_Mutation	p.Ala542Val	ENST00000389173	missense_variant	A/V	gCc/gTc	MODERATE	SNV
DNAH2	chr17	7758518.0	Missense_Mutation	p.Asp692Gly	ENST00000389173	missense_variant	D/G	gAt/gGt	MODERATE	SNV
DNAH2	chr17	7777533.0	Nonsense_Mutation	p.Glu1716Ter	ENST00000389173	stop_gained	E/*	Gaa/Taa	HIGH	SNV
DNAH2	chr17	7786148.0	Missense_Mutation	p.Ile2052Val	ENST00000389173	missense_variant	I/V	Att/Gtt	MODERATE	SNV
DNAH2	chr17	7797238.0	Silent	p.=	ENST00000389173	synonymous_variant	R	cgG/cgT	LOW	SNV
DNAH2	chr17	7831311.0	Missense_Mutation	p.Glu4152Asp	ENST00000389173	missense_variant	E/D	gaG/gaT	MODERATE	SNV
DNAH2	chr17	7796584.0	Missense_Mutation	p.Val2599Met	ENST00000389173	missense_variant	V/M	Gtg/Atg	MODERATE	SNV
DNAH2	chr17	7719762.0	Nonsense_Mutation	p.Arg10Ter	ENST00000389173	stop_gained	R/*	Cga/Tga	HIGH	SNV
DNAH2	chr17	7767916.0	Missense_Mutation	p.Gln1231Arg	ENST00000389173	missense_variant	Q/R	cAg/cGg	MODERATE	SNV
DNAH2	chr17	7779407.0	Missense_Mutation	p.Phe1902Leu	ENST00000389173	missense_variant	F/L	ttC/ttA	MODERATE	SNV
DNAH2	chr17	7798157.0	Missense_Mutation	p.Ile2744Thr	ENST00000389173	missense_variant;splice_region_variant	I/T	aTc/aCc	MODERATE	SNV
DNAH2	chr17	7737168.0	Silent	p.=	ENST00000389173	synonymous_variant	K	aaG/aaA	LOW	SNV
DNAH2	chr17	7801606.0	Missense_Mutation	p.Val2910Leu	ENST00000389173	missense_variant	V/L	Gtg/Ctg	MODERATE	SNV
DNAH2	chr17	7760752.0	Missense_Mutation	p.Asp933Gly	ENST00000389173	missense_variant	D/G	gAc/gGc	MODERATE	SNV
DNAH2	chr17	7764226.0	Missense_Mutation	p.Glu1097Lys	ENST00000389173	missense_variant	E/K	Gag/Aag	MODERATE	SNV
DNAH2	chr17	7765483.0	Missense_Mutation	p.Glu1143Asp	ENST00000389173	missense_variant	E/D	gaG/gaT	MODERATE	SNV
DNAH2	chr17	7737164.0	Missense_Mutation	p.Ser359Asn	ENST00000389173	missense_variant	S/N	aGc/aAc	MODERATE	SNV
DNAH2	chr17	7780245.0	Silent	p.=	ENST00000389173	synonymous_variant	A	gcA/gcG	LOW	SNV
DNAH2	chr17	7734270.0	Missense_Mutation	p.Lys239Thr	ENST00000389173	missense_variant	K/T	aAa/aCa	MODERATE	SNV
DNAH2	chr17	7774839.0	Nonsense_Mutation	p.Arg1528Ter	ENST00000389173	stop_gained	R/*	Cga/Tga	HIGH	SNV
DNAH2	chr17	7777601.0	Missense_Mutation	p.Asp1738Glu	ENST00000389173	missense_variant	D/E	gaC/gaA	MODERATE	SNV
DNAH2	chr17	7779346.0	Missense_Mutation	p.Gly1882Asp	ENST00000389173	missense_variant	G/D	gGc/gAc	MODERATE	SNV
DNAH2	chr17	7819309.0	Missense_Mutation	p.Ile3639Thr	ENST00000389173	missense_variant	I/T	aTc/aCc	MODERATE	SNV
DNAH2	chr17	7833462.0	Missense_Mutation	p.Arg4405Trp	ENST00000389173	missense_variant	R/W	Cgg/Tgg	MODERATE	SNV
DNAH2	chr17	7786343.0	Splice_Site		ENST00000389173	splice_donor_variant			HIGH	SNV
DNAH2	chr17	7797263.0	Splice_Site		ENST00000389173	splice_donor_variant			HIGH	SNV
DNAH2	chr17	7739921.0	Nonsense_Mutation	p.Trp453Ter	ENST00000389173	stop_gained	W/*	tgG/tgA	HIGH	SNV
DNAH2	chr17	7740503.0	Missense_Mutation	p.His487Arg	ENST00000389173	missense_variant	H/R	cAc/cGc	MODERATE	SNV
DNAH2	chr17	7734574.0	Missense_Mutation	p.Arg282Cys	ENST00000389173	missense_variant	R/C	Cgc/Tgc	MODERATE	SNV
DNAH2	chr17	7760842.0	Missense_Mutation	p.Arg963Gln	ENST00000389173	missense_variant	R/Q	cGg/cAg	MODERATE	SNV
COL12A1	chr6	75130941.0	Missense_Mutation	p.Arg1993Gln	ENST00000322507	missense_variant	R/Q	cGg/cAg	MODERATE	SNV
COL12A1	chr6	75142089.0	Missense_Mutation	p.Val1634Ile	ENST00000322507	missense_variant	V/I	Gtt/Att	MODERATE	SNV
COL12A1	chr6	75146163.0	Missense_Mutation	p.Ala1500Val	ENST00000322507	missense_variant	A/V	gCt/gTt	MODERATE	SNV
COL12A1	chr6	75165737.0	Missense_Mutation	p.Asp918Ala	ENST00000322507	missense_variant	D/A	gAc/gCc	MODERATE	SNV
COL12A1	chr6	75183535.0	Missense_Mutation	p.Ser469Ile	ENST00000322507	missense_variant	S/I	aGt/aTt	MODERATE	SNV
COL12A1	chr6	75194854.0	Missense_Mutation	p.Arg56Ile	ENST00000322507	missense_variant	R/I	aGa/aTa	MODERATE	SNV
COL12A1	chr6	75152010.0	Missense_Mutation	p.Arg1286His	ENST00000322507	missense_variant	R/H	cGc/cAc	MODERATE	SNV
COL12A1	chr6	75124349.0	Silent	p.=	ENST00000322507	synonymous_variant	L	ctG/ctT	LOW	SNV
COL12A1	chr6	75183353.0	Missense_Mutation	p.Ile530Leu	ENST00000322507	missense_variant	I/L	Ata/Tta	MODERATE	SNV
COL12A1	chr6	75180995.0	Missense_Mutation	p.Ala703Val	ENST00000322507	missense_variant	A/V	gCg/gTg	MODERATE	SNV
COL12A1	chr6	75121380.0	Silent	p.=	ENST00000322507	synonymous_variant	D	gaC/gaT	LOW	SNV
COL12A1	chr6	75133923.0	Missense_Mutation	p.Ala1867Thr	ENST00000322507	missense_variant	A/T	Gca/Aca	MODERATE	SNV
COL12A1	chr6	75175236.0	Missense_Mutation	p.Pro838Thr	ENST00000322507	missense_variant	P/T	Cca/Aca	MODERATE	SNV
COL12A1	chr6	75103755.0	Splice_Site		ENST00000322507	splice_donor_variant			HIGH	SNV
COL12A1	chr6	75128329.0	Missense_Mutation	p.Asp2103Asn	ENST00000322507	missense_variant	D/N	Gat/Aat	MODERATE	SNV
COL12A1	chr6	75142122.0	Missense_Mutation	p.Asp1623Tyr	ENST00000322507	missense_variant	D/Y	Gac/Tac	MODERATE	SNV
COL12A1	chr6	75183926.0	Missense_Mutation	p.Ala406Thr	ENST00000322507	missense_variant	A/T	Gcc/Acc	MODERATE	SNV
COL12A1	chr6	75097303.0	Missense_Mutation	p.Phe2843Val	ENST00000322507	missense_variant	F/V	Ttc/Gtc	MODERATE	SNV
COL12A1	chr6	75125241.0	Nonsense_Mutation	p.Glu2165Ter	ENST00000322507	stop_gained	E/*	Gaa/Taa	HIGH	SNV
COL12A1	chr6	75183246.0	Silent	p.=	ENST00000322507	synonymous_variant	R	agG/agA	LOW	SNV
COL12A1	chr6	75130892.0	Silent	p.=	ENST00000322507	synonymous_variant	S	tcG/tcA	LOW	SNV
COL12A1	chr6	75156372.0	Frame_Shift_Del	p.Thr1046GlnfsTer7	ENST00000322507	frameshift_variant	P/X	ccC/cc	HIGH	deletion
COL12A1	chr6	75113708.0	Silent	p.=	ENST00000322507	synonymous_variant	T	acG/acA	LOW	SNV
COL12A1	chr6	75123367.0	Silent	p.=	ENST00000322507	synonymous_variant	T	acA/acG	LOW	SNV
COL12A1	chr6	75143283.0	Missense_Mutation	p.Arg1599Gln	ENST00000322507	missense_variant	R/Q	cGa/cAa	MODERATE	SNV
COL12A1	chr6	75151977.0	Missense_Mutation	p.Arg1297Ile	ENST00000322507	missense_variant	R/I	aGa/aTa	MODERATE	SNV
COL12A1	chr6	75192223.0	Missense_Mutation	p.Gly108Val	ENST00000322507	missense_variant	G/V	gGa/gTa	MODERATE	SNV
COL12A1	chr6	75115785.0	Missense_Mutation	p.Ala2566Thr	ENST00000322507	missense_variant;splice_region_variant	A/T	Gca/Aca	MODERATE	SNV
COL12A1	chr6	75132068.0	Missense_Mutation	p.Ala1937Thr	ENST00000322507	missense_variant	A/T	Gca/Aca	MODERATE	SNV
COL12A1	chr6	75175256.0	Missense_Mutation	p.Lys831Thr	ENST00000322507	missense_variant	K/T	aAa/aCa	MODERATE	SNV
COL12A1	chr6	75175187.0	Frame_Shift_Del	p.Gly854ValfsTer8	ENST00000322507	frameshift_variant	G/X	gGt/gt	HIGH	deletion
COL12A1	chr6	75090162.0	Frame_Shift_Del	p.Arg2964GlyfsTer113	ENST00000322507	frameshift_variant	G/X	ggG/gg	HIGH	deletion
COL12A1	chr6	75109020.0	Missense_Mutation	p.Ala2700Thr	ENST00000322507	missense_variant;splice_region_variant	A/T	Gca/Aca	MODERATE	SNV
COL12A1	chr6	75146177.0	Silent	p.=	ENST00000322507	synonymous_variant	Q	caG/caA	LOW	SNV
COL12A1	chr6	75113641.0	Missense_Mutation	p.Asp2601Asn	ENST00000322507	missense_variant	D/N	Gac/Aac	MODERATE	SNV
COL12A1	chr6	75130142.0	Silent	p.=	ENST00000322507	synonymous_variant	Q	caG/caA	LOW	SNV
COL12A1	chr6	75183407.0	Missense_Mutation	p.Tyr512Asp	ENST00000322507	missense_variant	Y/D	Tac/Gac	MODERATE	SNV
COL12A1	chr6	75119434.0	Missense_Mutation	p.Phe2376Leu	ENST00000322507	missense_variant	F/L	Ttc/Ctc	MODERATE	SNV
COL12A1	chr6	75143340.0	Missense_Mutation	p.Ser1580Asn	ENST00000322507	missense_variant	S/N	aGc/aAc	MODERATE	SNV
COL12A1	chr6	75133358.0	Missense_Mutation	p.Thr1910Asn	ENST00000322507	missense_variant	T/N	aCt/aAt	MODERATE	SNV
COL12A1	chr6	75113739.0	Missense_Mutation	p.Leu2568Pro	ENST00000322507	missense_variant	L/P	cTa/cCa	MODERATE	SNV
COL12A1	chr6	75202803.0	5'UTR		ENST00000322507	5_prime_UTR_variant			MODIFIER	SNV
COL12A1	chr6	75134840.0	Missense_Mutation	p.Arg1804Trp	ENST00000322507	missense_variant	R/W	Cgg/Tgg	MODERATE	SNV
COL12A1	chr6	75151278.0	Frame_Shift_Del	p.Asn1337MetfsTer7	ENST00000322507	frameshift_variant	N/X	aAt/at	HIGH	deletion
COL12A1	chr6	75131983.0	Missense_Mutation	p.Arg1965His	ENST00000322507	missense_variant	R/H	cGc/cAc	MODERATE	SNV
COL12A1	chr6	75137435.0	Splice_Site		ENST00000322507	splice_donor_variant			HIGH	SNV
COL12A1	chr6	75194851.0	Missense_Mutation	p.Ile57Thr	ENST00000322507	missense_variant	I/T	aTa/aCa	MODERATE	SNV
COL12A1	chr6	75090270.0	Silent	p.=	ENST00000322507	synonymous_variant	L	ctG/ctA	LOW	SNV
COL12A1	chr6	75115854.0	Missense_Mutation	p.Glu2543Gln	ENST00000322507	missense_variant	E/Q	Gag/Cag	MODERATE	SNV
COL12A1	chr6	75145455.0	Missense_Mutation	p.Val1521Met	ENST00000322507	missense_variant;splice_region_variant	V/M	Gtg/Atg	MODERATE	SNV
COL12A1	chr6	75097269.0	Missense_Mutation	p.Gly2854Asp	ENST00000322507	missense_variant	G/D	gGc/gAc	MODERATE	SNV
COL12A1	chr6	75151925.0	Silent	p.=	ENST00000322507	synonymous_variant	D	gaC/gaT	LOW	SNV
COL12A1	chr6	75155705.0	Missense_Mutation	p.Val1134Leu	ENST00000322507	missense_variant	V/L	Gtg/Ctg	MODERATE	SNV
COL12A1	chr6	75151965.0	Missense_Mutation	p.Arg1301Leu	ENST00000322507	missense_variant	R/L	cGa/cTa	MODERATE	SNV
COL12A1	chr6	75138333.0	Silent	p.=	ENST00000322507	synonymous_variant	I	atC/atA	LOW	SNV
COL12A1	chr6	75125136.0	Missense_Mutation	p.Gly2200Arg	ENST00000322507	missense_variant	G/R	Ggc/Cgc	MODERATE	SNV
COL12A1	chr6	75130133.0	Silent	p.=	ENST00000322507	synonymous_variant	R	agG/agA	LOW	SNV
COL12A1	chr6	75181211.0	Missense_Mutation	p.Ala631Asp	ENST00000322507	missense_variant;splice_region_variant	A/D	gCt/gAt	MODERATE	SNV
COL12A1	chr6	75087680.0	Frame_Shift_Ins	p.Gly3027TrpfsTer19	ENST00000322507	frameshift_variant	P/PX	cct/ccCt	HIGH	insertion
COL12A1	chr6	75102684.0	Frame_Shift_Ins	p.Gly2777TrpfsTer37	ENST00000322507	frameshift_variant	P/PX	cct/ccCt	HIGH	insertion
COL12A1	chr6	75123356.0	Frame_Shift_Del	p.Pro2307LeufsTer21	ENST00000322507	frameshift_variant	P/X	cCt/ct	HIGH	deletion
COL12A1	chr6	75128382.0	Frame_Shift_Ins	p.Leu2085HisfsTer4	ENST00000322507	frameshift_variant	L/HX	ctg/cAtg	HIGH	insertion
COL12A1	chr6	75130959.0	Missense_Mutation	p.Arg1987His	ENST00000322507	missense_variant	R/H	cGc/cAc	MODERATE	SNV
COL12A1	chr6	75155794.0	Missense_Mutation	p.Arg1104Gln	ENST00000322507	missense_variant	R/Q	cGa/cAa	MODERATE	SNV
COL12A1	chr6	75189581.0	Frame_Shift_Ins	p.Ile210AsnfsTer4	ENST00000322507	frameshift_variant	I/NX	att/aAtt	HIGH	insertion
COL12A1	chr6	75087687.0	Missense_Mutation	p.Gly3024Ala	ENST00000322507	missense_variant	G/A	gGc/gCc	MODERATE	SNV
COL12A1	chr6	75117523.0	Missense_Mutation	p.Val2460Met	ENST00000322507	missense_variant	V/M	Gtg/Atg	MODERATE	SNV
COL12A1	chr6	75152396.0	Missense_Mutation	p.Val1218Met	ENST00000322507	missense_variant	V/M	Gtg/Atg	MODERATE	SNV
COL12A1	chr6	75113231.0	Missense_Mutation	p.Lys2641Asn	ENST00000322507	missense_variant	K/N	aaG/aaT	MODERATE	SNV
COL12A1	chr6	75143325.0	Missense_Mutation	p.Phe1585Cys	ENST00000322507	missense_variant	F/C	tTt/tGt	MODERATE	SNV
COL12A1	chr6	75175217.0	Missense_Mutation	p.Tyr844Cys	ENST00000322507	missense_variant	Y/C	tAt/tGt	MODERATE	SNV
COL12A1	chr6	75183419.0	Missense_Mutation	p.Asn508His	ENST00000322507	missense_variant	N/H	Aac/Cac	MODERATE	SNV
COL12A1	chr6	75154428.0	Missense_Mutation	p.Ile1185Phe	ENST00000322507	missense_variant	I/F	Att/Ttt	MODERATE	SNV
COL12A1	chr6	75151256.0	Missense_Mutation	p.Lys1344Asn	ENST00000322507	missense_variant	K/N	aaG/aaT	MODERATE	SNV
COL12A1	chr6	75165762.0	Missense_Mutation	p.Asp910Tyr	ENST00000322507	missense_variant	D/Y	Gat/Tat	MODERATE	SNV
COL12A1	chr6	75124067.0	Missense_Mutation	p.Arg2251His	ENST00000322507	missense_variant	R/H	cGt/cAt	MODERATE	SNV
COL12A1	chr6	75165692.0	Missense_Mutation	p.Arg933His	ENST00000322507	missense_variant	R/H	cGc/cAc	MODERATE	SNV
COL12A1	chr6	75115885.0	Missense_Mutation	p.Lys2532Asn	ENST00000322507	missense_variant	K/N	aaG/aaT	MODERATE	SNV
COL12A1	chr6	75148360.0	Nonsense_Mutation	p.Glu1429Ter	ENST00000322507	stop_gained;splice_region_variant	E/*	Gaa/Taa	HIGH	SNV
COL12A1	chr6	75155763.0	Silent	p.=	ENST00000322507	synonymous_variant	V	gtG/gtT	LOW	SNV
COL12A1	chr6	75143299.0	Missense_Mutation	p.Arg1594Cys	ENST00000322507	missense_variant	R/C	Cgt/Tgt	MODERATE	SNV
COL12A1	chr6	75124000.0	Frame_Shift_Del	p.Phe2273LeufsTer20	ENST00000322507	frameshift_variant	F/X	ttT/tt	HIGH	deletion
COL12A1	chr6	75119374.0	Missense_Mutation	p.Tyr2396His	ENST00000322507	missense_variant	Y/H	Tac/Cac	MODERATE	SNV
COL12A1	chr6	75130227.0	Missense_Mutation	p.Arg2025His	ENST00000322507	missense_variant	R/H	cGc/cAc	MODERATE	SNV
COL12A1	chr6	75123335.0	Missense_Mutation	p.Arg2314Pro	ENST00000322507	missense_variant	R/P	cGg/cCg	MODERATE	SNV
COL12A1	chr6	75131948.0	Missense_Mutation	p.Ser1977Pro	ENST00000322507	missense_variant	S/P	Tca/Cca	MODERATE	SNV
COL12A1	chr6	75119137.0	Silent	p.=	ENST00000322507	synonymous_variant	G	ggC/ggA	LOW	SNV
COL12A1	chr6	75086515.0	3'UTR		ENST00000322507	3_prime_UTR_variant			MODIFIER	SNV
COL12A1	chr6	75151924.0	Missense_Mutation	p.Asp1315Asn	ENST00000322507	missense_variant	D/N	Gat/Aat	MODERATE	SNV
COL12A1	chr6	75119389.0	Missense_Mutation	p.Leu2391Ile	ENST00000322507	missense_variant	L/I	Ctc/Atc	MODERATE	SNV
VCAN	chr5	83579988.0	Missense_Mutation	p.Gly3297Ser	ENST00000265077	missense_variant	G/S	Ggc/Agc	MODERATE	SNV
VCAN	chr5	83512446.0	Intron		ENST00000265077	intron_variant			MODIFIER	SNV
VCAN	chr5	83519720.0	Missense_Mutation	p.Asp472Asn	ENST00000265077	missense_variant	D/N	Gat/Aat	MODERATE	SNV
VCAN	chr5	83520553.0	Silent	p.=	ENST00000265077	synonymous_variant	F	ttC/ttT	LOW	SNV
VCAN	chr5	83520885.0	Missense_Mutation	p.Ser860Ile	ENST00000265077	missense_variant	S/I	aGt/aTt	MODERATE	SNV
VCAN	chr5	83538290.0	Missense_Mutation	p.Thr1763Ala	ENST00000265077	missense_variant	T/A	Aca/Gca	MODERATE	SNV
VCAN	chr5	83539858.0	Silent	p.=	ENST00000265077	synonymous_variant	P	ccC/ccA	LOW	SNV
VCAN	chr5	83539955.0	Missense_Mutation	p.Thr2318Ala	ENST00000265077	missense_variant	T/A	Aca/Gca	MODERATE	SNV
VCAN	chr5	83540531.0	Missense_Mutation	p.Val2510Leu	ENST00000265077	missense_variant	V/L	Gtg/Ttg	MODERATE	SNV
VCAN	chr5	83540698.0	Missense_Mutation	p.Glu2565Asp	ENST00000265077	missense_variant	E/D	gaA/gaC	MODERATE	SNV
VCAN	chr5	83553430.0	Missense_Mutation	p.Arg3187Gln	ENST00000265077	missense_variant	R/Q	cGa/cAa	MODERATE	SNV
VCAN	chr5	83545632.0	Missense_Mutation	p.Gly3121Arg	ENST00000265077	missense_variant	G/R	Gga/Aga	MODERATE	SNV
VCAN	chr5	83580163.0	Splice_Site		ENST00000265077	splice_donor_variant			HIGH	SNV
VCAN	chr5	83512433.0	Intron		ENST00000265077	intron_variant			MODIFIER	deletion
VCAN	chr5	83520405.0	Missense_Mutation	p.Thr700Ile	ENST00000265077	missense_variant	T/I	aCa/aTa	MODERATE	SNV
VCAN	chr5	83490236.0	Missense_Mutation	p.Glu70Gly	ENST00000265077	missense_variant	E/G	gAa/gGa	MODERATE	SNV
VCAN	chr5	83521680.0	Missense_Mutation	p.Arg1125His	ENST00000265077	missense_variant	R/H	cGc/cAc	MODERATE	SNV
VCAN	chr5	83539530.0	Missense_Mutation	p.Ser2176Tyr	ENST00000265077	missense_variant	S/Y	tCt/tAt	MODERATE	SNV
VCAN	chr5	83490460.0	Silent	p.=	ENST00000265077	synonymous_variant	L	Ctg/Ttg	LOW	SNV
VCAN	chr5	83540483.0	Nonsense_Mutation	p.Glu2494Ter	ENST00000265077	stop_gained	E/*	Gag/Tag	HIGH	SNV
VCAN	chr5	83537332.0	Missense_Mutation	p.Phe1443Leu	ENST00000265077	missense_variant	F/L	ttC/ttA	MODERATE	SNV
VCAN	chr5	83539660.0	Silent	p.=	ENST00000265077	synonymous_variant	E	gaA/gaG	LOW	SNV
VCAN	chr5	83542265.0	Missense_Mutation	p.Pro3088Thr	ENST00000265077	missense_variant	P/T	Cca/Aca	MODERATE	SNV
VCAN	chr5	83519495.0	Frame_Shift_Del	p.Val398TrpfsTer22	ENST00000265077	frameshift_variant	P/X	Ccc/cc	HIGH	deletion
VCAN	chr5	83538768.0	Missense_Mutation	p.Arg1922Met	ENST00000265077	missense_variant	R/M	aGg/aTg	MODERATE	SNV
VCAN	chr5	83521174.0	Missense_Mutation	p.Ser956Arg	ENST00000265077	missense_variant	S/R	agT/agG	MODERATE	SNV
VCAN	chr5	83536996.0	Intron		ENST00000265077	intron_variant			MODIFIER	insertion
VCAN	chr5	83539470.0	Missense_Mutation	p.Ser2156Tyr	ENST00000265077	missense_variant	S/Y	tCt/tAt	MODERATE	SNV
VCAN	chr5	83541594.0	Missense_Mutation	p.Ser2864Tyr	ENST00000265077	missense_variant	S/Y	tCt/tAt	MODERATE	SNV
VCAN	chr5	83547974.0	Missense_Mutation	p.Phe3128Cys	ENST00000265077	missense_variant	F/C	tTt/tGt	MODERATE	SNV
VCAN	chr5	83580601.0	3'UTR		ENST00000265077	3_prime_UTR_variant			MODIFIER	SNV
VCAN	chr5	83522148.0	Missense_Mutation	p.Thr1281Met	ENST00000265077	missense_variant	T/M	aCg/aTg	MODERATE	SNV
VCAN	chr5	83520216.0	Missense_Mutation	p.Gly637Ala	ENST00000265077	missense_variant	G/A	gGc/gCc	MODERATE	SNV
VCAN	chr5	83580112.0	Missense_Mutation	p.Arg3338Gln	ENST00000265077	missense_variant	R/Q	cGg/cAg	MODERATE	SNV
VCAN	chr5	83537193.0	Missense_Mutation	p.Ala1397Glu	ENST00000265077	missense_variant	A/E	gCa/gAa	MODERATE	SNV
VCAN	chr5	83537197.0	Silent	p.=	ENST00000265077	synonymous_variant	N	aaT/aaC	LOW	SNV
VCAN	chr5	83512327.0	Missense_Mutation	p.Leu325Met	ENST00000265077	missense_variant	L/M	Ctg/Atg	MODERATE	SNV
VCAN	chr5	83483539.0	Missense_Mutation	p.Ser7Arg	ENST00000265077	missense_variant	S/R	agC/agG	MODERATE	SNV
VCAN	chr5	83580447.0	3'UTR		ENST00000265077	3_prime_UTR_variant			MODIFIER	SNV
VCAN	chr5	83545562.0	Silent	p.=	ENST00000265077	synonymous_variant	P	ccG/ccA	LOW	SNV
VCAN	chr5	83537461.0	Silent	p.=	ENST00000265077	synonymous_variant	Y	taC/taT	LOW	SNV
VCAN	chr5	83537854.0	Missense_Mutation	p.Glu1617Asp	ENST00000265077	missense_variant	E/D	gaA/gaC	MODERATE	SNV
VCAN	chr5	83541407.0	Missense_Mutation	p.Ser2802Thr	ENST00000265077	missense_variant	S/T	Tcc/Acc	MODERATE	SNV
VCAN	chr5	83539068.0	Missense_Mutation	p.Val2022Asp	ENST00000265077	missense_variant	V/D	gTt/gAt	MODERATE	SNV
VCAN	chr5	83572421.0	Silent	p.=	ENST00000265077	synonymous_variant	Y	taC/taT	LOW	SNV
VCAN	chr5	83540061.0	Missense_Mutation	p.Thr2353Met	ENST00000265077	missense_variant	T/M	aCg/aTg	MODERATE	SNV
VCAN	chr5	83493879.0	Missense_Mutation	p.Phe232Leu	ENST00000265077	missense_variant	F/L	ttC/ttA	MODERATE	SNV
VCAN	chr5	83536997.0	Intron		ENST00000265077	intron_variant			MODIFIER	deletion
VCAN	chr5	83537772.0	Missense_Mutation	p.Ser1590Tyr	ENST00000265077	missense_variant	S/Y	tCt/tAt	MODERATE	SNV
VCAN	chr5	83512474.0	Intron		ENST00000265077	intron_variant			MODIFIER	SNV
VCAN	chr5	83512222.0	Missense_Mutation	p.Gly290Ser	ENST00000265077	missense_variant	G/S	Ggc/Agc	MODERATE	SNV
VCAN	chr5	83541455.0	Missense_Mutation	p.Ala2818Thr	ENST00000265077	missense_variant	A/T	Gcg/Acg	MODERATE	SNV
VCAN	chr5	83554980.0	Missense_Mutation	p.Ile3226Lys	ENST00000265077	missense_variant	I/K	aTa/aAa	MODERATE	SNV
VCAN	chr5	83522232.0	Missense_Mutation	p.Thr1309Met	ENST00000265077	missense_variant	T/M	aCg/aTg	MODERATE	SNV
VCAN	chr5	83490429.0	Silent	p.=	ENST00000265077	synonymous_variant	Y	taC/taT	LOW	SNV
VCAN	chr5	83520093.0	Missense_Mutation	p.Asp596Gly	ENST00000265077	missense_variant	D/G	gAc/gGc	MODERATE	SNV
VCAN	chr5	83521295.0	Missense_Mutation	p.Leu997Ile	ENST00000265077	missense_variant	L/I	Cta/Ata	MODERATE	SNV
VCAN	chr5	83522014.0	Silent	p.=	ENST00000265077	synonymous_variant	I	atC/atT	LOW	SNV
VCAN	chr5	83540422.0	Silent	p.=	ENST00000265077	synonymous_variant	S	agC/agT	LOW	SNV
VCAN	chr5	83541794.0	Missense_Mutation	p.Asp2931Tyr	ENST00000265077	missense_variant	D/Y	Gat/Tat	MODERATE	SNV
VCAN	chr5	83542115.0	Missense_Mutation	p.Leu3038Ile	ENST00000265077	missense_variant	L/I	Ctt/Att	MODERATE	SNV
VCAN	chr5	83572487.0	Silent	p.=	ENST00000265077	synonymous_variant	I	atT/atA	LOW	SNV
VCAN	chr5	83540417.0	Missense_Mutation	p.Pro2472Ser	ENST00000265077	missense_variant	P/S	Cca/Tca	MODERATE	SNV
VCAN	chr5	83579982.0	Missense_Mutation	p.Ala3295Thr	ENST00000265077	missense_variant;splice_region_variant	A/T	Gct/Act	MODERATE	SNV
VCAN	chr5	83580111.0	Missense_Mutation	p.Arg3338Trp	ENST00000265077	missense_variant	R/W	Cgg/Tgg	MODERATE	SNV
VCAN	chr5	83483580.0	Missense_Mutation	p.Leu21Pro	ENST00000265077	missense_variant	L/P	cTa/cCa	MODERATE	SNV
VCAN	chr5	83490214.0	Missense_Mutation	p.Arg63Cys	ENST00000265077	missense_variant	R/C	Cgc/Tgc	MODERATE	SNV
VCAN	chr5	83538536.0	Nonsense_Mutation	p.Glu1845Ter	ENST00000265077	stop_gained	E/*	Gaa/Taa	HIGH	SNV
VCAN	chr5	83539963.0	Silent	p.=	ENST00000265077	synonymous_variant	I	atC/atA	LOW	SNV
VCAN	chr5	83540216.0	Missense_Mutation	p.Ala2405Thr	ENST00000265077	missense_variant	A/T	Gct/Act	MODERATE	SNV
VCAN	chr5	83541624.0	Missense_Mutation	p.Ala2874Val	ENST00000265077	missense_variant	A/V	gCg/gTg	MODERATE	SNV
VCAN	chr5	83536979.0	Intron		ENST00000265077	intron_variant			MODIFIER	SNV
VCAN	chr5	83580040.0	Missense_Mutation	p.Arg3314His	ENST00000265077	missense_variant	R/H	cGt/cAt	MODERATE	SNV
VCAN	chr5	83537152.0	Silent	p.=	ENST00000265077	synonymous_variant	L	ctA/ctG	LOW	SNV
VCAN	chr5	83540446.0	Silent	p.=	ENST00000265077	synonymous_variant	G	ggA/ggG	LOW	SNV
VCAN	chr5	83519503.0	Silent	p.=	ENST00000265077	synonymous_variant	G	ggA/ggT	LOW	SNV
VCAN	chr5	83545570.0	Missense_Mutation	p.Asn3100Ser	ENST00000265077	missense_variant	N/S	aAc/aGc	MODERATE	SNV
VCAN	chr5	83539856.0	Missense_Mutation	p.Pro2285Thr	ENST00000265077	missense_variant	P/T	Ccc/Acc	MODERATE	SNV
VCAN	chr5	83521173.0	Missense_Mutation	p.Ser956Thr	ENST00000265077	missense_variant	S/T	aGt/aCt	MODERATE	SNV
VCAN	chr5	83580535.0	3'UTR		ENST00000265077	3_prime_UTR_variant			MODIFIER	insertion
VCAN	chr5	83580537.0	3'UTR		ENST00000265077	3_prime_UTR_variant			MODIFIER	insertion
VCAN	chr5	83521932.0	Missense_Mutation	p.Thr1209Ile	ENST00000265077	missense_variant	T/I	aCt/aTt	MODERATE	SNV
VCAN	chr5	83579987.0	Silent	p.=	ENST00000265077	synonymous_variant	C	tgC/tgT	LOW	SNV
VCAN	chr5	83540290.0	Frame_Shift_Ins	p.Glu2431ArgfsTer10	ENST00000265077	frameshift_variant	-/X	-/G	HIGH	insertion
VCAN	chr5	83540510.0	Missense_Mutation	p.Thr2503Ala	ENST00000265077	missense_variant	T/A	Act/Gct	MODERATE	SNV
COL5A1	chr9	134727274.0	Missense_Mutation	p.Ile221Met	ENST00000371817	missense_variant	I/M	atC/atG	MODERATE	SNV
COL5A1	chr9	134786009.0	Frame_Shift_Del	p.Pro870GlnfsTer204	ENST00000371817	frameshift_variant	V/X	gtC/gt	HIGH	deletion
COL5A1	chr9	134699971.0	Missense_Mutation	p.Ala114Thr	ENST00000371817	missense_variant	A/T	Gcc/Acc	MODERATE	SNV
COL5A1	chr9	134825898.0	Silent	p.=	ENST00000371817	synonymous_variant	S	tcC/tcT	LOW	SNV
COL5A1	chr9	134806261.0	Missense_Mutation	p.Gly1111Arg	ENST00000371817	missense_variant	G/R	Gga/Aga	MODERATE	SNV
COL5A1	chr9	134815604.0	Missense_Mutation	p.Gly1348Ala	ENST00000371817	missense_variant	G/A	gGc/gCc	MODERATE	SNV
COL5A1	chr9	134824719.0	Silent	p.=	ENST00000371817	synonymous_variant	D	gaC/gaT	LOW	SNV
COL5A1	chr9	134818664.0	Silent	p.=	ENST00000371817	synonymous_variant	A	gcC/gcT	LOW	SNV
COL5A1	chr9	134730388.0	Frame_Shift_Del	p.Glu361ArgfsTer197	ENST00000371817	frameshift_variant	E/X	gaG/ga	HIGH	deletion
COL5A1	chr9	134820197.0	Missense_Mutation	p.Gly1510Ser	ENST00000371817	missense_variant	G/S	Ggc/Agc	MODERATE	SNV
COL5A1	chr9	134830000.0	Nonsense_Mutation	p.Glu1698Ter	ENST00000371817	stop_gained	E/*	Gaa/Taa	HIGH	SNV
COL5A1	chr9	134728674.0	Missense_Mutation	p.Thr264Met	ENST00000371817	missense_variant	T/M	aCg/aTg	MODERATE	SNV
COL5A1	chr9	134810290.0	Frame_Shift_Del	p.Asp1172ThrfsTer104	ENST00000371817	frameshift_variant	K/X	aaG/aa	HIGH	deletion
COL5A1	chr9	134814030.0	Frame_Shift_Del	p.Pro1302ArgfsTer186	ENST00000371817	frameshift_variant	G/X	ggC/gg	HIGH	deletion
COL5A1	chr9	134796901.0	Splice_Region	p.=	ENST00000371817	splice_region_variant;synonymous_variant	P	ccT/ccA	LOW	SNV
COL5A1	chr9	134750544.0	Frame_Shift_Del	p.Pro501LeufsTer57	ENST00000371817	frameshift_variant;splice_region_variant	G/X	ggC/gg	HIGH	deletion
COL5A1	chr9	134750586.0	Silent	p.=	ENST00000371817	synonymous_variant	P	ccC/ccA	LOW	SNV
COL5A1	chr9	134758282.0	Missense_Mutation	p.Glu641Lys	ENST00000371817	missense_variant	E/K	Gag/Aag	MODERATE	SNV
COL5A1	chr9	134761931.0	Missense_Mutation	p.Pro648Ala	ENST00000371817	missense_variant	P/A	Cct/Gct	MODERATE	SNV
COL5A1	chr9	134796895.0	Frame_Shift_Del	p.Pro966LeufsTer108	ENST00000371817	frameshift_variant	G/X	ggC/gg	HIGH	deletion
COL5A1	chr9	134731636.0	Silent	p.=	ENST00000371817	synonymous_variant	P	ccG/ccA	LOW	SNV
COL5A1	chr9	134728772.0	Missense_Mutation	p.Val297Met	ENST00000371817	missense_variant	V/M	Gtg/Atg	MODERATE	SNV
COL5A1	chr9	134750807.0	Silent	p.=	ENST00000371817	synonymous_variant	G	ggC/ggT	LOW	SNV
COL5A1	chr9	134805180.0	Missense_Mutation	p.Gly1075Asp	ENST00000371817	missense_variant	G/D	gGc/gAc	MODERATE	SNV
COL5A1	chr9	134700057.0	Silent	p.=	ENST00000371817	synonymous_variant	D	gaC/gaT	LOW	SNV
COL5A1	chr9	134728709.0	Missense_Mutation	p.Glu276Lys	ENST00000371817	missense_variant	E/K	Gaa/Aaa	MODERATE	SNV
COL5A1	chr9	134732126.0	Missense_Mutation	p.Pro463Leu	ENST00000371817	missense_variant;splice_region_variant	P/L	cCg/cTg	MODERATE	SNV
COL5A1	chr9	134812490.0	Silent	p.=	ENST00000371817	synonymous_variant	D	gaC/gaT	LOW	SNV
COL5A1	chr9	134750557.0	Missense_Mutation	p.Pro504Thr	ENST00000371817	missense_variant	P/T	Cca/Aca	MODERATE	SNV
COL5A1	chr9	134801982.0	Frame_Shift_Ins	p.Gly997ArgfsTer17	ENST00000371817	frameshift_variant	G/GX	ggc/ggCc	HIGH	insertion
COL5A1	chr9	134815605.0	Frame_Shift_Del	p.Gly1351GlufsTer137	ENST00000371817	frameshift_variant	G/X	ggC/gg	HIGH	deletion
COL5A1	chr9	134823430.0	Silent	p.=	ENST00000371817	synonymous_variant	P	ccG/ccA	LOW	SNV
COL5A1	chr9	134824654.0	Missense_Mutation	p.Arg1585Trp	ENST00000371817	missense_variant	R/W	Cgg/Tgg	MODERATE	SNV
COL5A1	chr9	134835040.0	Missense_Mutation	p.Ala1736Thr	ENST00000371817	missense_variant	A/T	Gcc/Acc	MODERATE	SNV
COL5A1	chr9	134842373.0	3'UTR		ENST00000371817	3_prime_UTR_variant			MODIFIER	SNV
COL5A1	chr9	134763718.0	Missense_Mutation	p.Arg672Met	ENST00000371817	missense_variant	R/M	aGg/aTg	MODERATE	SNV
COL5A1	chr9	134818893.0	Missense_Mutation	p.Gly1462Ser	ENST00000371817	missense_variant	G/S	Ggc/Agc	MODERATE	SNV
COL5A1	chr9	134819039.0	Missense_Mutation	p.Pro1478Ser	ENST00000371817	missense_variant	P/S	Ccc/Tcc	MODERATE	SNV
COL5A1	chr9	134820143.0	Missense_Mutation	p.Gly1492Ser	ENST00000371817	missense_variant	G/S	Ggt/Agt	MODERATE	SNV
COL5A1	chr9	134731583.0	Missense_Mutation	p.Asp418Asn	ENST00000371817	missense_variant	D/N	Gac/Aac	MODERATE	SNV
COL5A1	chr9	134765735.0	Splice_Site		ENST00000371817	splice_donor_variant			HIGH	SNV
COL5A1	chr9	134750617.0	Splice_Site		ENST00000371817	splice_donor_variant			HIGH	SNV
COL5A1	chr9	134784987.0	Splice_Site	p.Glu830GlyfsTer14	ENST00000371817	splice_acceptor_variant			HIGH	insertion
COL5A1	chr9	134750554.0	Missense_Mutation	p.Arg503Cys	ENST00000371817	missense_variant	R/C	Cgc/Tgc	MODERATE	SNV
COL5A1	chr9	134824657.0	Missense_Mutation	p.Asn1586Tyr	ENST00000371817	missense_variant	N/Y	Aac/Tac	MODERATE	SNV
COL5A1	chr9	134825878.0	Missense_Mutation	p.Val1681Ile	ENST00000371817	missense_variant	V/I	Gtc/Atc	MODERATE	SNV
COL5A1	chr9	134806249.0	Missense_Mutation	p.Pro1107Ser	ENST00000371817	missense_variant	P/S	Cct/Tct	MODERATE	SNV
COL5A1	chr9	134824683.0	Silent	p.=	ENST00000371817	synonymous_variant	D	gaC/gaT	LOW	SNV
COL5A1	chr9	134728687.0	Silent	p.=	ENST00000371817	synonymous_variant	G	ggC/ggT	LOW	SNV
COL5A1	chr9	134812664.0	Silent	p.=	ENST00000371817	synonymous_variant	P	ccA/ccG	LOW	SNV
COL5A1	chr9	134820222.0	Missense_Mutation	p.Gln1518Arg	ENST00000371817	missense_variant;splice_region_variant	Q/R	cAg/cGg	MODERATE	SNV
COL5A1	chr9	134842179.0	Missense_Mutation	p.Thr1798Met	ENST00000371817	missense_variant	T/M	aCg/aTg	MODERATE	SNV
COL5A1	chr9	134750872.0	Missense_Mutation	p.Gln551Pro	ENST00000371817	missense_variant	Q/P	cAg/cCg	MODERATE	SNV
COL5A1	chr9	134699966.0	Missense_Mutation	p.Ser112Asn	ENST00000371817	missense_variant	S/N	aGc/aAc	MODERATE	SNV
COL5A1	chr9	134754309.0	Missense_Mutation	p.Gly604Arg	ENST00000371817	missense_variant	G/R	Ggg/Agg	MODERATE	SNV
COL5A1	chr9	134801983.0	Frame_Shift_Del	p.Gly997AlafsTer77	ENST00000371817	frameshift_variant	G/X	ggC/gg	HIGH	deletion
COL5A1	chr9	134817061.0	Frame_Shift_Del	p.Pro1388LeufsTer100	ENST00000371817	frameshift_variant	S/X	tcG/tc	HIGH	deletion
COL5A1	chr9	134738512.0	Silent	p.=	ENST00000371817	synonymous_variant	P	ccC/ccT	LOW	SNV
COL5A1	chr9	134738749.0	Missense_Mutation	p.Leu479Ile	ENST00000371817	missense_variant	L/I	Ctt/Att	MODERATE	SNV
COL5A1	chr9	134802967.0	Missense_Mutation	p.Pro1029Leu	ENST00000371817	missense_variant	P/L	cCg/cTg	MODERATE	SNV
COL5A1	chr9	134815628.0	Missense_Mutation	p.Ala1356Val	ENST00000371817	missense_variant;splice_region_variant	A/V	gCg/gTg	MODERATE	SNV
COL5A1	chr9	134830001.0	Missense_Mutation	p.Glu1698Ala	ENST00000371817	missense_variant	E/A	gAa/gCa	MODERATE	SNV
COL5A1	chr9	134728723.0	Silent	p.=	ENST00000371817	synonymous_variant	Y	taC/taT	LOW	SNV
COL5A1	chr9	134818883.0	Silent	p.=	ENST00000371817	synonymous_variant	D	gaC/gaT	LOW	SNV
COL5A1	chr9	134823002.0	Missense_Mutation	p.Pro1538Leu	ENST00000371817	missense_variant	P/L	cCg/cTg	MODERATE	SNV
COL5A1	chr9	134727372.0	Missense_Mutation	p.Ser254Leu	ENST00000371817	missense_variant	S/L	tCg/tTg	MODERATE	SNV
COL5A1	chr9	134728727.0	Missense_Mutation	p.Asp282Tyr	ENST00000371817	missense_variant	D/Y	Gac/Tac	MODERATE	SNV
COL5A1	chr9	134731639.0	Silent	p.=	ENST00000371817	synonymous_variant	A	gcG/gcA	LOW	SNV
COL5A1	chr9	134782704.0	Missense_Mutation	p.Gly823Asp	ENST00000371817	missense_variant	G/D	gGc/gAc	MODERATE	SNV
COL5A1	chr9	134817802.0	Missense_Mutation	p.Glu1401Lys	ENST00000371817	missense_variant	E/K	Gaa/Aaa	MODERATE	SNV
COL5A1	chr9	134727265.0	Splice_Site		ENST00000371817	splice_acceptor_variant			HIGH	SNV
COL5A1	chr9	134795266.0	Missense_Mutation	p.Pro917Leu	ENST00000371817	missense_variant	P/L	cCg/cTg	MODERATE	SNV
COL5A1	chr9	134754287.0	Silent	p.=	ENST00000371817	synonymous_variant	V	gtG/gtA	LOW	SNV
COL5A1	chr9	134798433.0	Missense_Mutation	p.Pro975Leu	ENST00000371817	missense_variant	P/L	cCa/cTa	MODERATE	SNV
COL5A1	chr9	134780118.0	Missense_Mutation	p.Arg801His	ENST00000371817	missense_variant	R/H	cGt/cAt	MODERATE	SNV
COL5A1	chr9	134795309.0	Frame_Shift_Del	p.Lys933ArgfsTer141	ENST00000371817	frameshift_variant	G/X	ggC/gg	HIGH	deletion
COL5A1	chr9	134766461.0	Missense_Mutation	p.Thr699Met	ENST00000371817	missense_variant	T/M	aCg/aTg	MODERATE	SNV
COL5A1	chr9	134732127.0	Splice_Region	p.=	ENST00000371817	splice_region_variant;synonymous_variant	P	ccG/ccA	LOW	SNV
COL5A1	chr9	134805191.0	Missense_Mutation	p.Pro1079Ser	ENST00000371817	missense_variant	P/S	Ccc/Tcc	MODERATE	SNV
COL5A1	chr9	134815597.0	Missense_Mutation	p.Asp1346Tyr	ENST00000371817	missense_variant	D/Y	Gat/Tat	MODERATE	SNV
COL5A1	chr9	134701261.0	Silent	p.=	ENST00000371817	synonymous_variant	S	agC/agT	LOW	SNV
COL5A1	chr9	134820206.0	Missense_Mutation	p.Gly1513Ser	ENST00000371817	missense_variant	G/S	Ggt/Agt	MODERATE	SNV
COL5A1	chr9	134750550.0	Silent	p.=	ENST00000371817	synonymous_variant	P	ccT/ccC	LOW	SNV
COL5A1	chr9	134806233.0	Silent	p.=	ENST00000371817	synonymous_variant	I	atC/atT	LOW	SNV
COL5A1	chr9	134801989.0	Silent	p.=	ENST00000371817	synonymous_variant	P	ccC/ccT	LOW	SNV
DNAH14	chr1	225351709.0	Missense_Mutation	p.Cys2891Gly	ENST00000445597	missense_variant	C/G	Tgc/Ggc	MODERATE	SNV
DNAH14	chr1	225380278.0	Missense_Mutation	p.Met3169Thr	ENST00000445597	missense_variant	M/T	aTg/aCg	MODERATE	SNV
DNAH14	chr1	225206057.0	Missense_Mutation	p.Thr1595Ala	ENST00000445597	missense_variant	T/A	Aca/Gca	MODERATE	SNV
DNAH14	chr1	225258068.0	Intron		ENST00000445597	intron_variant			MODIFIER	SNV
DNAH14	chr1	225360813.0	Intron		ENST00000445597	intron_variant			MODIFIER	SNV
DNAH14	chr1	225152863.0	Missense_Mutation	p.Arg1299Cys	ENST00000445597	missense_variant	R/C	Cgc/Tgc	MODERATE	SNV
DNAH14	chr1	225140845.0	Silent	p.=	ENST00000445597	synonymous_variant	H	caC/caT	LOW	SNV
DNAH14	chr1	225119227.0	Intron		ENST00000445597	intron_variant			MODIFIER	SNV
DNAH14	chr1	225152030.0	Missense_Mutation	p.Arg1229Cys	ENST00000445597	missense_variant	R/C	Cgt/Tgt	MODERATE	SNV
DNAH14	chr1	225353848.0	Intron		ENST00000445597	intron_variant			MODIFIER	SNV
DNAH14	chr1	225152050.0	Silent	p.=	ENST00000445597	synonymous_variant	A	gcG/gcA	LOW	SNV
DNAH14	chr1	224967720.0	Intron		ENST00000445597	intron_variant			MODIFIER	SNV
DNAH14	chr1	225159362.0	Silent	p.=	ENST00000445597	synonymous_variant	I	atC/atT	LOW	SNV
DNAH14	chr1	225273027.0	Intron		ENST00000445597	intron_variant			MODIFIER	SNV
DNAH14	chr1	225082723.0	Intron		ENST00000445597	intron_variant			MODIFIER	SNV
DNAH14	chr1	225259242.0	Intron		ENST00000445597	intron_variant			MODIFIER	deletion
DNAH14	chr1	225192737.0	Missense_Mutation	p.Asn1477Lys	ENST00000445597	missense_variant	N/K	aaT/aaA	MODERATE	SNV
DNAH14	chr1	225007426.0	Missense_Mutation	p.Arg349Gln	ENST00000445597	missense_variant	R/Q	cGa/cAa	MODERATE	SNV
DNAH14	chr1	225338178.0	Intron		ENST00000445597	intron_variant			MODIFIER	SNV
DNAH14	chr1	225340682.0	Missense_Mutation	p.Asn2657Lys	ENST00000445597	missense_variant	N/K	aaT/aaG	MODERATE	SNV
DNAH14	chr1	225364794.0	Intron		ENST00000445597	intron_variant			MODIFIER	SNV
DNAH14	chr1	225367938.0	Intron		ENST00000445597	intron_variant			MODIFIER	SNV
DNAH14	chr1	224967751.0	Intron		ENST00000445597	intron_variant			MODIFIER	deletion
DNAH14	chr1	225152754.0	Silent	p.=	ENST00000445597	synonymous_variant	A	gcA/gcG	LOW	SNV
DNAH14	chr1	225002918.0	Intron		ENST00000445597	intron_variant			MODIFIER	SNV
DNAH14	chr1	225043781.0	Intron		ENST00000445597	intron_variant			MODIFIER	SNV
DNAH14	chr1	225338121.0	Intron		ENST00000445597	intron_variant			MODIFIER	deletion
DNAH14	chr1	225097235.0	Intron		ENST00000445597	intron_variant			MODIFIER	SNV
DNAH14	chr1	225153754.0	Missense_Mutation	p.His1307Arg	ENST00000445597	missense_variant	H/R	cAt/cGt	MODERATE	SNV
DNAH14	chr1	225380285.0	Silent	p.=	ENST00000445597	synonymous_variant	S	tcA/tcG	LOW	SNV
DNAH14	chr1	225023636.0	Frame_Shift_Del	p.Lys396ArgfsTer4	ENST00000445597	frameshift_variant	K/X	AAa/a	HIGH	deletion
DNAH14	chr1	225152031.0	Missense_Mutation	p.Arg1229His	ENST00000445597	missense_variant	R/H	cGt/cAt	MODERATE	SNV
DNAH14	chr1	225337448.0	Frame_Shift_Ins	p.Ile2559AsnfsTer2	ENST00000445597	frameshift_variant	-/X	-/A	HIGH	insertion
DNAH14	chr1	225119289.0	Intron		ENST00000445597	intron_variant			MODIFIER	deletion
DNAH14	chr1	225374822.0	Intron		ENST00000445597	intron_variant			MODIFIER	SNV
DNAH14	chr1	225346104.0	Silent	p.=	ENST00000445597	synonymous_variant	A	gcG/gcT	LOW	SNV
DNAH14	chr1	225147139.0	Intron		ENST00000445597	intron_variant			MODIFIER	SNV
DNAH14	chr1	225265185.0	Missense_Mutation	p.Asn1863Thr	ENST00000445597	missense_variant	N/T	aAt/aCt	MODERATE	SNV
DNAH14	chr1	225340654.0	Missense_Mutation	p.Leu2648His	ENST00000445597	missense_variant	L/H	cTt/cAt	MODERATE	SNV
DNAH14	chr1	225324284.0	Silent	p.=	ENST00000445597	synonymous_variant	L	ctG/ctC	LOW	SNV
DNAH14	chr1	225144525.0	Missense_Mutation	p.Arg1145Gln	ENST00000445597	missense_variant	R/Q	cGa/cAa	MODERATE	SNV
DNAH14	chr1	225265367.0	Missense_Mutation	p.Arg1924Trp	ENST00000445597	missense_variant;splice_region_variant	R/W	Cgg/Tgg	MODERATE	SNV
DNAH14	chr1	225023841.0	Frame_Shift_Del	p.Lys466ArgfsTer42	ENST00000445597	frameshift_variant	E/X	gAa/ga	HIGH	deletion
DNAH14	chr1	225364888.0	Intron		ENST00000445597	intron_variant			MODIFIER	SNV
DNAH14	chr1	225240735.0	Missense_Mutation	p.Pro1794Ser	ENST00000445597	missense_variant	P/S	Ccc/Tcc	MODERATE	SNV
DNAH14	chr1	224955033.0	Missense_Mutation	p.Lys228Thr	ENST00000445597	missense_variant	K/T	aAg/aCg	MODERATE	SNV
DNAH14	chr1	224967531.0	Missense_Mutation	p.Thr327Ile	ENST00000445597	missense_variant	T/I	aCt/aTt	MODERATE	SNV
DNAH14	chr1	225043051.0	Nonsense_Mutation	p.Glu588Ter	ENST00000445597	stop_gained	E/*	Gaa/Taa	HIGH	SNV
DNAH14	chr1	225079307.0	Missense_Mutation	p.Ser776Tyr	ENST00000445597	missense_variant	S/Y	tCt/tAt	MODERATE	SNV
DNAH14	chr1	225140814.0	Missense_Mutation	p.Ser1033Tyr	ENST00000445597	missense_variant	S/Y	tCt/tAt	MODERATE	SNV
DNAH14	chr1	225240724.0	Missense_Mutation	p.Ile1790Thr	ENST00000445597	missense_variant	I/T	aTa/aCa	MODERATE	SNV
DNAH14	chr1	225265322.0	Missense_Mutation	p.Leu1909Val	ENST00000445597	missense_variant	L/V	Tta/Gta	MODERATE	SNV
DNAH14	chr1	225273048.0	Intron		ENST00000445597	intron_variant			MODIFIER	SNV
DNAH14	chr1	225289927.0	Missense_Mutation	p.Ala2026Thr	ENST00000445597	missense_variant	A/T	Gcc/Acc	MODERATE	SNV
DNAH14	chr1	225333473.0	Intron		ENST00000445597	intron_variant			MODIFIER	SNV
DNAH14	chr1	225360756.0	Intron		ENST00000445597	intron_variant			MODIFIER	SNV
DNAH14	chr1	225364860.0	Intron		ENST00000445597	intron_variant			MODIFIER	SNV
DNAH14	chr1	225381545.0	Missense_Mutation	p.Ser3238Tyr	ENST00000445597	missense_variant	S/Y	tCt/tAt	MODERATE	SNV
DNAH14	chr1	225038693.0	Splice_Site		ENST00000445597	splice_acceptor_variant			HIGH	SNV
DNAH14	chr1	225207005.0	Missense_Mutation	p.Ser1648Leu	ENST00000445597	missense_variant	S/L	tCa/tTa	MODERATE	SNV
DNAH14	chr1	225272059.0	Intron		ENST00000445597	intron_variant			MODIFIER	SNV
DNAH14	chr1	225333405.0	Intron		ENST00000445597	intron_variant			MODIFIER	SNV
DNAH14	chr1	224960234.0	Intron		ENST00000445597	intron_variant			MODIFIER	insertion
DNAH14	chr1	225289910.0	Missense_Mutation	p.Lys2020Arg	ENST00000445597	missense_variant	K/R	aAa/aGa	MODERATE	SNV
DNAH14	chr1	225079420.0	Missense_Mutation	p.Phe814Leu	ENST00000445597	missense_variant	F/L	Ttt/Ctt	MODERATE	SNV
DNAH14	chr1	225192766.0	Missense_Mutation	p.Tyr1487Phe	ENST00000445597	missense_variant	Y/F	tAt/tTt	MODERATE	SNV
DNAH14	chr1	224964552.0	Silent	p.=	ENST00000445597	synonymous_variant	P	ccG/ccA	LOW	SNV
DNAH14	chr1	225192825.0	Nonsense_Mutation	p.Arg1507Ter	ENST00000445597	stop_gained	R/*	Cga/Tga	HIGH	SNV
DNAH14	chr1	225333367.0	Intron		ENST00000445597	intron_variant			MODIFIER	SNV
DNAH14	chr1	225360719.0	Intron		ENST00000445597	intron_variant			MODIFIER	SNV
DNAH14	chr1	225337322.0	Silent	p.=	ENST00000445597	synonymous_variant	A	gcC/gcT	LOW	SNV
DNAH14	chr1	224955056.0	Nonsense_Mutation	p.Val236AlafsTer3	ENST00000445597	stop_gained;frameshift_variant	V/AS*VX	gtt/gCTTCTTAGGTtt	HIGH	insertion
DNAH14	chr1	225002898.0	Intron		ENST00000445597	intron_variant			MODIFIER	insertion
DNAH14	chr1	225042891.0	In_Frame_Ins	p.Phe534_Glu535insAsnLeu	ENST00000445597	inframe_insertion	-/NL	-/AATTTA	MODERATE	insertion
DNAH14	chr1	225042893.0	Frame_Shift_Ins	p.Val536TyrfsTer11	ENST00000445597	frameshift_variant	E/EYX	gaa/gaATACa	HIGH	insertion
DNAH14	chr1	225119288.0	Intron		ENST00000445597	intron_variant			MODIFIER	insertion
DNAH14	chr1	225396645.0	Intron		ENST00000445597	intron_variant			MODIFIER	SNV
DNAH14	chr1	225257977.0	Intron		ENST00000445597	intron_variant			MODIFIER	SNV
DNAH14	chr1	225289906.0	Frame_Shift_Del	p.Thr2021HisfsTer9	ENST00000445597	frameshift_variant	K/X	Aaa/aa	HIGH	deletion
DNAH14	chr1	225392330.0	Missense_Mutation	p.Arg3347Gln	ENST00000445597	missense_variant	R/Q	cGa/cAa	MODERATE	SNV
DNAH14	chr1	225192877.0	Missense_Mutation	p.Leu1524Pro	ENST00000445597	missense_variant	L/P	cTc/cCc	MODERATE	SNV
ASPM	chr1	197139780.0	Frame_Shift_Del	p.Lys671AsnfsTer3	ENST00000367409	frameshift_variant	K/X	aaA/aa	HIGH	deletion
ASPM	chr1	197100938.0	Silent	p.=	ENST00000367409	synonymous_variant	N	aaC/aaT	LOW	SNV
ASPM	chr1	197093252.0	Missense_Mutation	p.Ala3032Thr	ENST00000367409	missense_variant	A/T	Gct/Act	MODERATE	SNV
ASPM	chr1	197101355.0	Missense_Mutation	p.Gln2632His	ENST00000367409	missense_variant	Q/H	caG/caT	MODERATE	SNV
ASPM	chr1	197117871.0	Missense_Mutation	p.Arg1328Ile	ENST00000367409	missense_variant	R/I	aGa/aTa	MODERATE	SNV
ASPM	chr1	197104777.0	Missense_Mutation	p.Val1492Ile	ENST00000367409	missense_variant	V/I	Gtt/Att	MODERATE	SNV
ASPM	chr1	197103635.0	Frame_Shift_Ins	p.Leu1872PhefsTer24	ENST00000367409	frameshift_variant	L/FX	ttg/ttTg	HIGH	insertion
ASPM	chr1	197101024.0	Nonsense_Mutation	p.Arg2743Ter	ENST00000367409	stop_gained	R/*	Cga/Tga	HIGH	SNV
ASPM	chr1	197102256.0	Missense_Mutation	p.Arg2332Gln	ENST00000367409	missense_variant	R/Q	cGa/cAa	MODERATE	SNV
ASPM	chr1	197104242.0	Missense_Mutation	p.Val1670Ala	ENST00000367409	missense_variant	V/A	gTt/gCt	MODERATE	SNV
ASPM	chr1	197130044.0	Nonsense_Mutation	p.Glu834Ter	ENST00000367409	stop_gained	E/*	Gaa/Taa	HIGH	SNV
ASPM	chr1	197143334.0	Missense_Mutation	p.Leu306Phe	ENST00000367409	missense_variant	L/F	ttG/ttT	MODERATE	SNV
ASPM	chr1	197117932.0	Missense_Mutation	p.Ala1308Ser	ENST00000367409	missense_variant	A/S	Gca/Tca	MODERATE	SNV
ASPM	chr1	197103714.0	Missense_Mutation	p.Ser1846Tyr	ENST00000367409	missense_variant	S/Y	tCt/tAt	MODERATE	SNV
ASPM	chr1	197143270.0	Missense_Mutation	p.Ala328Thr	ENST00000367409	missense_variant	A/T	Gct/Act	MODERATE	SNV
ASPM	chr1	197104211.0	Frame_Shift_Ins	p.Asn1680LysfsTer11	ENST00000367409	frameshift_variant	N/KX	aat/aaAt	HIGH	insertion
ASPM	chr1	197090339.0	Frame_Shift_Ins	p.Ile3229AsnfsTer2	ENST00000367409	frameshift_variant	I/NX	att/aAtt	HIGH	insertion
ASPM	chr1	197101182.0	Missense_Mutation	p.Arg2690Gln	ENST00000367409	missense_variant	R/Q	cGg/cAg	MODERATE	SNV
ASPM	chr1	197102159.0	Missense_Mutation	p.Ile2364Met	ENST00000367409	missense_variant	I/M	atC/atG	MODERATE	SNV
ASPM	chr1	197124873.0	Silent	p.=	ENST00000367409	synonymous_variant	F	ttT/ttC	LOW	SNV
ASPM	chr1	197096021.0	Silent	p.=	ENST00000367409	synonymous_variant	F	ttC/ttT	LOW	SNV
ASPM	chr1	197084204.0	3'UTR		ENST00000367409	3_prime_UTR_variant			MODIFIER	insertion
ASPM	chr1	197142932.0	Missense_Mutation	p.Glu440Asp	ENST00000367409	missense_variant	E/D	gaA/gaT	MODERATE	SNV
ASPM	chr1	197090233.0	Silent	p.=	ENST00000367409	synonymous_variant	K	aaG/aaA	LOW	SNV
ASPM	chr1	197102046.0	Missense_Mutation	p.Arg2402Thr	ENST00000367409	missense_variant	R/T	aGa/aCa	MODERATE	SNV
ASPM	chr1	197084205.0	3'UTR		ENST00000367409	3_prime_UTR_variant			MODIFIER	deletion
ASPM	chr1	197101393.0	Frame_Shift_Ins	p.Gln2620ThrfsTer17	ENST00000367409	frameshift_variant	-/X	-/A	HIGH	insertion
ASPM	chr1	197102470.0	Frame_Shift_Del	p.Met2261Ter	ENST00000367409	frameshift_variant	M/X	Atg/tg	HIGH	deletion
ASPM	chr1	197142439.0	Frame_Shift_Del	p.Ser605LeufsTer16	ENST00000367409	frameshift_variant	S/X	Tct/ct	HIGH	deletion
ASPM	chr1	197104101.0	Frame_Shift_Ins	p.Ile1717AsnfsTer24	ENST00000367409	frameshift_variant	I/NX	ata/aAta	HIGH	insertion
ASPM	chr1	197122565.0	Missense_Mutation	p.Gly1141Ser	ENST00000367409	missense_variant	G/S	Ggc/Agc	MODERATE	SNV
ASPM	chr1	197125190.0	Nonsense_Mutation	p.Arg980Ter	ENST00000367409	stop_gained;splice_region_variant	R/*	Cga/Tga	HIGH	SNV
ASPM	chr1	197128497.0	Missense_Mutation	p.Arg977Cys	ENST00000367409	missense_variant	R/C	Cgc/Tgc	MODERATE	SNV
ASPM	chr1	197102886.0	Nonsense_Mutation	p.Phe2122delinsCysPheCysTyrPheLeuTerLeu	ENST00000367409	stop_gained;protein_altering_variant	F/CFCYFL*L	ttt/tGTTTTTGTTATTTTCTTTAACtt	HIGH	insertion
ASPM	chr1	197142892.0	Missense_Mutation	p.Leu454Ile	ENST00000367409	missense_variant	L/I	Cta/Ata	MODERATE	SNV
ASPM	chr1	197142679.0	Missense_Mutation	p.Val525Leu	ENST00000367409	missense_variant	V/L	Gtg/Ttg	MODERATE	SNV
ASPM	chr1	197104942.0	Missense_Mutation	p.Arg1437Cys	ENST00000367409	missense_variant	R/C	Cgt/Tgt	MODERATE	SNV
ASPM	chr1	197102455.0	Missense_Mutation	p.Ala2266Thr	ENST00000367409	missense_variant	A/T	Gca/Aca	MODERATE	SNV
ASPM	chr1	197104137.0	Missense_Mutation	p.Ala1705Val	ENST00000367409	missense_variant	A/V	gCa/gTa	MODERATE	SNV
ASPM	chr1	197125082.0	Missense_Mutation	p.Leu1016Val	ENST00000367409	missense_variant	L/V	Ctt/Gtt	MODERATE	SNV
ASPM	chr1	197124892.0	Nonsense_Mutation	p.Trp1049Ter	ENST00000367409	stop_gained	W/*	tGg/tAg	HIGH	SNV
ASPM	chr1	197125135.0	Missense_Mutation	p.Pro998Leu	ENST00000367409	missense_variant	P/L	cCg/cTg	MODERATE	SNV
ASPM	chr1	197086915.0	Missense_Mutation	p.Ala3407Thr	ENST00000367409	missense_variant	A/T	Gct/Act	MODERATE	SNV
ASPM	chr1	197086868.0	Silent	p.=	ENST00000367409	synonymous_variant	K	aaG/aaA	LOW	SNV
ASPM	chr1	197122473.0	Silent	p.=	ENST00000367409	synonymous_variant	C	tgT/tgC	LOW	SNV
ASPM	chr1	197104402.0	Nonsense_Mutation	p.Arg1617Ter	ENST00000367409	stop_gained	R/*	Cga/Tga	HIGH	SNV
ASPM	chr1	197142472.0	Missense_Mutation	p.Thr594Ala	ENST00000367409	missense_variant	T/A	Aca/Gca	MODERATE	SNV
ASPM	chr1	197117875.0	Nonsense_Mutation	p.Arg1327Ter	ENST00000367409	stop_gained	R/*	Cga/Tga	HIGH	SNV
ASPM	chr1	197101060.0	Missense_Mutation	p.Glu2731Lys	ENST00000367409	missense_variant	E/K	Gaa/Aaa	MODERATE	SNV
ASPM	chr1	197103177.0	Missense_Mutation	p.Val2025Ala	ENST00000367409	missense_variant	V/A	gTa/gCa	MODERATE	SNV
ASPM	chr1	197124311.0	Frame_Shift_Del	p.Asn1062ArgfsTer28	ENST00000367409	frameshift_variant	NL/X	aACTTA/a	HIGH	deletion
ASPM	chr1	197102712.0	Missense_Mutation	p.Val2180Glu	ENST00000367409	missense_variant	V/E	gTa/gAa	MODERATE	SNV
ASPM	chr1	197102871.0	Missense_Mutation	p.Phe2127Ser	ENST00000367409	missense_variant	F/S	tTt/tCt	MODERATE	SNV
ASPM	chr1	197117845.0	Missense_Mutation	p.Met1337Leu	ENST00000367409	missense_variant	M/L	Atg/Ctg	MODERATE	SNV
ASPM	chr1	197142428.0	Silent	p.=	ENST00000367409	synonymous_variant	E	gaG/gaA	LOW	SNV
ASPM	chr1	197143003.0	Missense_Mutation	p.Asn417Asp	ENST00000367409	missense_variant	N/D	Aat/Gat	MODERATE	SNV
ASPM	chr1	197101162.0	Missense_Mutation	p.Ser2697Pro	ENST00000367409	missense_variant	S/P	Tca/Cca	MODERATE	SNV
ASPM	chr1	197101807.0	Silent	p.=	ENST00000367409	synonymous_variant	R	Agg/Cgg	LOW	SNV
ASPM	chr1	197103085.0	Missense_Mutation	p.Ala2056Thr	ENST00000367409	missense_variant	A/T	Gct/Act	MODERATE	SNV
ASPM	chr1	197142356.0	Missense_Mutation	p.Glu632Asp	ENST00000367409	missense_variant	E/D	gaG/gaT	MODERATE	SNV
ASPM	chr1	197122160.0	Frame_Shift_Del	p.Lys1247ArgfsTer21	ENST00000367409	frameshift_variant;splice_region_variant	K/X	aAg/ag	HIGH	deletion
ASPM	chr1	197101206.0	Missense_Mutation	p.Arg2682Gln	ENST00000367409	missense_variant	R/Q	cGa/cAa	MODERATE	SNV
ASPM	chr1	197104519.0	Nonsense_Mutation	p.Arg1578Ter	ENST00000367409	stop_gained	R/*	Cga/Tga	HIGH	SNV
ASPM	chr1	197103287.0	Silent	p.=	ENST00000367409	synonymous_variant	K	aaG/aaA	LOW	SNV
ASPM	chr1	197101393.0	Frame_Shift_Ins	p.Gln2620AsnfsTer22	ENST00000367409	frameshift_variant	-/X	-/AA	HIGH	insertion
ASPM	chr1	197086957.0	Missense_Mutation	p.Ser3393Pro	ENST00000367409	missense_variant	S/P	Tcc/Ccc	MODERATE	SNV
ASPM	chr1	197088230.0	Intron		ENST00000367409	intron_variant			MODIFIER	SNV
ASPM	chr1	197102933.0	Silent	p.=	ENST00000367409	synonymous_variant	G	ggT/ggC	LOW	SNV
ASPM	chr1	197104596.0	Missense_Mutation	p.Lys1552Ile	ENST00000367409	missense_variant	K/I	aAa/aTa	MODERATE	SNV
ASPM	chr1	197100629.0	Missense_Mutation	p.Gln2874His	ENST00000367409	missense_variant	Q/H	caA/caC	MODERATE	SNV
ASPM	chr1	197101993.0	Missense_Mutation	p.Ser2420Pro	ENST00000367409	missense_variant	S/P	Tca/Cca	MODERATE	SNV
ASPM	chr1	197102839.0	Missense_Mutation	p.Thr2138Ala	ENST00000367409	missense_variant	T/A	Aca/Gca	MODERATE	SNV
ASPM	chr1	197104851.0	Missense_Mutation	p.Ser1467Phe	ENST00000367409	missense_variant	S/F	tCt/tTt	MODERATE	SNV
ASPM	chr1	197146229.0	Missense_Mutation	p.Pro70His	ENST00000367409	missense_variant	P/H	cCt/cAt	MODERATE	SNV
ASPM	chr1	197103623.0	Frame_Shift_Del	p.Ala1877LeufsTer2	ENST00000367409	frameshift_variant	A/X	gcA/gc	HIGH	deletion
ASPM	chr1	197100872.0	Missense_Mutation	p.Met2793Ile	ENST00000367409	missense_variant	M/I	atG/atA	MODERATE	SNV
ASPM	chr1	197143062.0	Frame_Shift_Del	p.Leu397Ter	ENST00000367409	frameshift_variant	L/X	tTa/ta	HIGH	deletion
SOX9	chr17	72123769.0	Frame_Shift_Del	p.Val306CysfsTer77	ENST00000245479	frameshift_variant	P/X	ccG/cc	HIGH	deletion
SOX9	chr17	72121483.0	Missense_Mutation	p.Ala31Val	ENST00000245479	missense_variant	A/V	gCg/gTg	MODERATE	SNV
SOX9	chr17	72124037.0	Nonsense_Mutation	p.Arg394Ter	ENST00000245479	stop_gained	R/*	Cga/Tga	HIGH	SNV
SOX9	chr17	72124040.0	Frame_Shift_Ins	p.His396ArgfsTer8	ENST00000245479	frameshift_variant	T/TX	acg/aCGcg	HIGH	insertion
SOX9	chr17	72123564.0	Frame_Shift_Del	p.Pro237ThrfsTer14	ENST00000245479	frameshift_variant	T/X	aCC/a	HIGH	deletion
SOX9	chr17	72123553.0	Frame_Shift_Del	p.Gly233AlafsTer20	ENST00000245479	frameshift_variant	Q/X	caG/ca	HIGH	deletion
SOX9	chr17	72123593.0	Nonsense_Mutation	p.Gln246Ter	ENST00000245479	stop_gained	Q/*	Cag/Tag	HIGH	SNV
SOX9	chr17	72122740.0	In_Frame_Del	p.Arg152del	ENST00000245479	inframe_deletion	KR/K	aaGCGg/aag	MODERATE	deletion
SOX9	chr17	72123621.0	Frame_Shift_Ins	p.Pro258GlyfsTer23	ENST00000245479	frameshift_variant	E/EGX	gag/gaGGGGCg	HIGH	insertion
SOX9	chr17	72123621.0	Frame_Shift_Ins	p.Arg257AlafsTer39	ENST00000245479	frameshift_variant	E/EX	gag/gaGg	HIGH	insertion
SOX9	chr17	72121752.0	Missense_Mutation	p.Arg121Gly	ENST00000245479	missense_variant	R/G	Agg/Ggg	MODERATE	SNV
SOX9	chr17	72124338.0	Frame_Shift_Ins	p.Gln496ProfsTer82	ENST00000245479	frameshift_variant	S/SX	agc/agCc	HIGH	insertion
SOX9	chr17	72123729.0	Frame_Shift_Del	p.Val291AlafsTer92	ENST00000245479	frameshift_variant	V/X	gTc/gc	HIGH	deletion
SOX9	chr17	72121472.0	Silent	p.=	ENST00000245479	synonymous_variant	S	tcC/tcT	LOW	SNV
SOX9	chr17	72122790.0	Missense_Mutation	p.Asp168Gly	ENST00000245479	missense_variant	D/G	gAc/gGc	MODERATE	SNV
SOX9	chr17	72123576.0	Frame_Shift_Del	p.Thr243ProfsTer10	ENST00000245479	frameshift_variant	T/X	aCc/ac	HIGH	deletion
SOX9	chr17	72123779.0	Missense_Mutation	p.Ala308Ser	ENST00000245479	missense_variant	A/S	Gcc/Tcc	MODERATE	SNV
SOX9	chr17	72124100.0	Frame_Shift_Del	p.Gln416AsnfsTer54	ENST00000245479	frameshift_variant	P/X	Ccc/cc	HIGH	deletion
SOX9	chr17	72122778.0	Missense_Mutation	p.Gln164Pro	ENST00000245479	missense_variant	Q/P	cAg/cCg	MODERATE	SNV
SOX9	chr17	72124200.0	Frame_Shift_Del	p.Ser448Ter	ENST00000245479	frameshift_variant	S/X	tCC/t	HIGH	deletion
SOX9	chr17	72123639.0	Frame_Shift_Ins	p.Arg264GlnfsTer32	ENST00000245479	frameshift_variant	E/EX	gag/gaGg	HIGH	insertion
SOX9	chr17	72124021.0	Frame_Shift_Ins	p.Gly390ArgfsTer14	ENST00000245479	frameshift_variant	-/X	-/CC	HIGH	insertion
SOX9	chr17	72122724.0	Frame_Shift_Del	p.Leu146ArgfsTer37	ENST00000245479	frameshift_variant	L/X	cTg/cg	HIGH	deletion
SOX9	chr17	72123728.0	Frame_Shift_Ins	p.Glu293GlnfsTer4	ENST00000245479	frameshift_variant	V/VNX	gtc/gTCAAtc	HIGH	insertion
SOX9	chr17	72122813.0	Missense_Mutation	p.Pro176Ser	ENST00000245479	missense_variant	P/S	Ccg/Tcg	MODERATE	SNV
SOX9	chr17	72124058.0	Nonsense_Mutation	p.Gln401Ter	ENST00000245479	stop_gained	Q/*	Cag/Tag	HIGH	SNV
SOX9	chr17	72123617.0	Frame_Shift_Ins	p.Gly256ArgfsTer24	ENST00000245479	frameshift_variant	R/RX	cga/cGAga	HIGH	insertion
SOX9	chr17	72124116.0	Missense_Mutation	p.Tyr420Cys	ENST00000245479	missense_variant	Y/C	tAc/tGc	MODERATE	SNV
SOX9	chr17	72121720.0	Missense_Mutation	p.Asn110Ser	ENST00000245479	missense_variant	N/S	aAc/aGc	MODERATE	SNV
SOX9	chr17	72123618.0	Frame_Shift_Del	p.Glu255GlyfsTer40	ENST00000245479	frameshift_variant	R/X	cGA/c	HIGH	deletion
SOX9	chr17	72124012.0	Frame_Shift_Del	p.Glu388Ter	ENST00000245479	frameshift_variant	LSSEPGQSQRTHIKT/X	ctGAGCAGCGAGCCGGGCCAGTCCCAGCGAACGCACATCAAGACG/ct	HIGH	deletion
SOX9	chr17	72124265.0	Missense_Mutation	p.Asn470Asp	ENST00000245479	missense_variant	N/D	Aac/Gac	MODERATE	SNV
SOX9	chr17	72124094.0	Frame_Shift_Ins	p.His413LeufsTer58	ENST00000245479	frameshift_variant	H/LX	cac/cTGac	HIGH	insertion
SOX9	chr17	72124096.0	In_Frame_Del	p.His413_Ser414delinsGln	ENST00000245479	inframe_deletion	HS/Q	caCTCg/cag	MODERATE	deletion
SOX9	chr17	72123772.0	Frame_Shift_Ins	p.Pro307CysfsTer77	ENST00000245479	frameshift_variant	-/X	-/GT	HIGH	insertion
SOX9	chr17	72121811.0	Silent	p.=	ENST00000245479	synonymous_variant	G	ggC/ggT	LOW	SNV
SOX9	chr17	72123741.0	Nonsense_Mutation	p.Asp295GlufsTer10	ENST00000245479	stop_gained;frameshift_variant	D/EEECGSLPY*NQISKX	gac/gaGGAGGAGTGTGGCAGTTTGCCATATTAAAACCAGATAAGCAAGTc	HIGH	insertion
SOX9	chr17	72122801.0	Missense_Mutation	p.Tyr172His	ENST00000245479	missense_variant	Y/H	Tac/Cac	MODERATE	SNV
SOX9	chr17	72122811.0	Missense_Mutation	p.Gln175Pro	ENST00000245479	missense_variant	Q/P	cAg/cCg	MODERATE	SNV
SOX9	chr17	72124053.0	Frame_Shift_Ins	p.Glu400GlyfsTer178	ENST00000245479	frameshift_variant	T/TX	acg/acGg	HIGH	insertion
SOX9	chr17	72124073.0	Frame_Shift_Ins	p.His406GlnfsTer172	ENST00000245479	frameshift_variant	H/QX	cac/cAac	HIGH	insertion
SOX9	chr17	72123723.0	Frame_Shift_Ins	p.Asp290ArgfsTer6	ENST00000245479	frameshift_variant	F/FX	ttc/ttCc	HIGH	insertion
SOX9	chr17	72123667.0	Missense_Mutation	p.Phe270Leu	ENST00000245479	missense_variant	F/L	ttC/ttA	MODERATE	SNV
SOX9	chr17	72121459.0	Frame_Shift_Ins	p.Thr25ProfsTer37	ENST00000245479	frameshift_variant	S/SX	agc/agCCc	HIGH	insertion
SOX9	chr17	72124072.0	Frame_Shift_Ins	p.Ser408ThrfsTer64	ENST00000245479	frameshift_variant	-/HX	-/CACTA	HIGH	insertion
SOX9	chr17	72124157.0	Frame_Shift_Del	p.Ile435SerfsTer35	ENST00000245479	frameshift_variant	P/X	Ccc/cc	HIGH	deletion
SOX9	chr17	72122971.0	Frame_Shift_Del		ENST00000245479	frameshift_variant;splice_region_variant	S/X	tcG/tc	HIGH	deletion
SOX9	chr17	72123990.0	Frame_Shift_Ins	p.Ala379GlyfsTer5	ENST00000245479	frameshift_variant	Q/QX	cag/caGGg	HIGH	insertion
SOX9	chr17	72121620.0	Missense_Mutation	p.Val77Phe	ENST00000245479	missense_variant	V/F	Gtc/Ttc	MODERATE	SNV
SOX9	chr17	72121569.0	Frame_Shift_Ins	p.Lys61GlufsTer191	ENST00000245479	frameshift_variant	L/LX	ctg/cTtg	HIGH	insertion
SOX9	chr17	72121812.0	Missense_Mutation	p.Lys141Glu	ENST00000245479	missense_variant	K/E	Aag/Gag	MODERATE	SNV
SOX9	chr17	72123621.0	Frame_Shift_Ins	p.Arg257GlyfsTer23	ENST00000245479	frameshift_variant	E/EX	gag/gaGGg	HIGH	insertion
SOX9	chr17	72124287.0	Frame_Shift_Ins	p.Thr478HisfsTer100	ENST00000245479	frameshift_variant	Y/YX	tac/taCc	HIGH	insertion
SOX9	chr17	72123673.0	Frame_Shift_Ins	p.Asp274TrpfsTer6	ENST00000245479	frameshift_variant	-/X	-/GT	HIGH	insertion
SOX9	chr17	72122799.0	Frame_Shift_Ins	p.Tyr172LeufsTer80	ENST00000245479	frameshift_variant	D/DX	gat/gaTt	HIGH	insertion
SOX9	chr17	72121672.0	Missense_Mutation	p.Arg94His	ENST00000245479	missense_variant	R/H	cGc/cAc	MODERATE	SNV
SOX9	chr17	72121574.0	Frame_Shift_Ins	p.Glu63GlyfsTer189	ENST00000245479	frameshift_variant	-/X	-/A	HIGH	insertion
SOX9	chr17	72122706.0	Splice_Site		ENST00000245479	splice_acceptor_variant;coding_sequence_variant;intron_variant			HIGH	deletion
SOX9	chr17	72123542.0	Splice_Site		ENST00000245479	splice_acceptor_variant			HIGH	SNV
SOX9	chr17	72124124.0	Frame_Shift_Del	p.Phe423SerfsTer47	ENST00000245479	frameshift_variant	F/X	Ttc/tc	HIGH	deletion
SOX9	chr17	72124173.0	Frame_Shift_Ins	p.Tyr440ValfsTer138	ENST00000245479	frameshift_variant	Q/QX	cag/caGg	HIGH	insertion
SOX9	chr17	72124177.0	Frame_Shift_Ins	p.Asp441GlyfsTer137	ENST00000245479	frameshift_variant	-/X	-/G	HIGH	insertion
SOX9	chr17	72122909.0	Nonsense_Mutation	p.Gln208Ter	ENST00000245479	stop_gained	Q/*	Cag/Tag	HIGH	SNV
SOX9	chr17	72121794.0	Missense_Mutation	p.Leu135Phe	ENST00000245479	missense_variant	L/F	Ctc/Ttc	MODERATE	SNV
SOX9	chr17	72124204.0	Frame_Shift_Ins	p.Tyr451PhefsTer128	ENST00000245479	frameshift_variant	-/SX	-/TCCT	HIGH	insertion
SOX9	chr17	72123545.0	Nonsense_Mutation	p.Gln230Ter	ENST00000245479	stop_gained;splice_region_variant	Q/*	Caa/Taa	HIGH	SNV
SOX9	chr17	72123768.0	Frame_Shift_Ins	p.Val306GlyfsTer272	ENST00000245479	frameshift_variant	P/PX	ccg/ccGg	HIGH	insertion
SOX9	chr17	72121749.0	Missense_Mutation	p.Arg120Cys	ENST00000245479	missense_variant	R/C	Cgc/Tgc	MODERATE	SNV
SOX9	chr17	72123974.0	Frame_Shift_Del	p.Pro374ArgfsTer9	ENST00000245479	frameshift_variant	P/X	Ccc/cc	HIGH	deletion
SOX9	chr17	72122729.0	Nonsense_Mutation	p.Glu148Ter	ENST00000245479	stop_gained	E/*	Gag/Tag	HIGH	SNV
RP1	chr8	54621469.0	Missense_Mutation	p.Arg168His	ENST00000220676	missense_variant	R/H	cGt/cAt	MODERATE	SNV
RP1	chr8	54622164.0	Silent	p.=	ENST00000220676	synonymous_variant	A	gcG/gcA	LOW	SNV
RP1	chr8	54626393.0	Silent	p.=	ENST00000220676	synonymous_variant	Q	caA/caG	LOW	SNV
RP1	chr8	54626104.0	Missense_Mutation	p.Asn741Thr	ENST00000220676	missense_variant	N/T	aAt/aCt	MODERATE	SNV
RP1	chr8	54629614.0	Missense_Mutation	p.Tyr1911Cys	ENST00000220676	missense_variant	Y/C	tAt/tGt	MODERATE	SNV
RP1	chr8	54628700.0	Silent	p.=	ENST00000220676	synonymous_variant	T	acA/acT	LOW	SNV
RP1	chr8	54627214.0	Nonsense_Mutation	p.Ser1111Ter	ENST00000220676	stop_gained	S/*	tCa/tAa	HIGH	SNV
RP1	chr8	54625100.0	Missense_Mutation	p.Glu406Asp	ENST00000220676	missense_variant	E/D	gaG/gaT	MODERATE	SNV
RP1	chr8	54625741.0	Missense_Mutation	p.Ser620Tyr	ENST00000220676	missense_variant	S/Y	tCt/tAt	MODERATE	SNV
RP1	chr8	54629130.0	Nonsense_Mutation	p.Glu1750Ter	ENST00000220676	stop_gained	E/*	Gaa/Taa	HIGH	SNV
RP1	chr8	54629950.0	Missense_Mutation	p.Lys2023Thr	ENST00000220676	missense_variant	K/T	aAa/aCa	MODERATE	SNV
RP1	chr8	54630342.0	Missense_Mutation	p.Glu2154Lys	ENST00000220676	missense_variant	E/K	Gaa/Aaa	MODERATE	SNV
RP1	chr8	54627719.0	Frame_Shift_Del	p.Pro1282LeufsTer12	ENST00000220676	frameshift_variant	T/X	acT/ac	HIGH	deletion
RP1	chr8	54621110.0	Silent	p.=	ENST00000220676	synonymous_variant	F	ttC/ttT	LOW	SNV
RP1	chr8	54625550.0	Missense_Mutation	p.Lys556Asn	ENST00000220676	missense_variant	K/N	aaG/aaT	MODERATE	SNV
RP1	chr8	54624851.0	Silent	p.=	ENST00000220676	synonymous_variant	I	atT/atA	LOW	SNV
RP1	chr8	54622131.0	Missense_Mutation	p.Gln210His	ENST00000220676	missense_variant	Q/H	caG/caT	MODERATE	SNV
RP1	chr8	54622248.0	Silent	p.=	ENST00000220676	synonymous_variant	R	cgT/cgC	LOW	SNV
RP1	chr8	54628724.0	Silent	p.=	ENST00000220676	synonymous_variant	S	agT/agC	LOW	SNV
RP1	chr8	54630280.0	Missense_Mutation	p.Leu2133Arg	ENST00000220676	missense_variant	L/R	cTt/cGt	MODERATE	SNV
RP1	chr8	54621010.0	Missense_Mutation	p.Thr15Met	ENST00000220676	missense_variant	T/M	aCg/aTg	MODERATE	SNV
RP1	chr8	54625124.0	Silent	p.=	ENST00000220676	synonymous_variant	D	gaT/gaC	LOW	SNV
RP1	chr8	54626032.0	Missense_Mutation	p.Ser717Leu	ENST00000220676	missense_variant	S/L	tCa/tTa	MODERATE	SNV
RP1	chr8	54621246.0	Missense_Mutation	p.Arg94Cys	ENST00000220676	missense_variant	R/C	Cgc/Tgc	MODERATE	SNV
RP1	chr8	54625226.0	Frame_Shift_Ins	p.Thr451TyrfsTer22	ENST00000220676	frameshift_variant	-/X	-/C	HIGH	insertion
RP1	chr8	54626253.0	Frame_Shift_Del	p.Arg793GlufsTer55	ENST00000220676	frameshift_variant	K/X	Aaa/aa	HIGH	deletion
RP1	chr8	54628299.0	Missense_Mutation	p.Asn1473Tyr	ENST00000220676	missense_variant	N/Y	Aac/Tac	MODERATE	SNV
RP1	chr8	54629369.0	Frame_Shift_Del	p.His1831MetfsTer17	ENST00000220676	frameshift_variant	P/X	ccT/cc	HIGH	deletion
RP1	chr8	54628619.0	Frame_Shift_Del	p.Lys1581AsnfsTer7	ENST00000220676	frameshift_variant	L/X	ttA/tt	HIGH	deletion
RP1	chr8	54621166.0	Missense_Mutation	p.Leu67Pro	ENST00000220676	missense_variant	L/P	cTg/cCg	MODERATE	SNV
RP1	chr8	54626471.0	Silent	p.=	ENST00000220676	synonymous_variant	H	caC/caT	LOW	SNV
RP1	chr8	54621390.0	Missense_Mutation	p.Val142Ile	ENST00000220676	missense_variant	V/I	Gta/Ata	MODERATE	SNV
RP1	chr8	54628210.0	Missense_Mutation	p.Arg1443Gln	ENST00000220676	missense_variant	R/Q	cGg/cAg	MODERATE	SNV
RP1	chr8	54629481.0	Missense_Mutation	p.Val1867Ile	ENST00000220676	missense_variant	V/I	Gtc/Atc	MODERATE	SNV
RP1	chr8	54621419.0	Frame_Shift_Del	p.Pro153HisfsTer4	ENST00000220676	frameshift_variant	R/X	cgC/cg	HIGH	deletion
RP1	chr8	54630043.0	Missense_Mutation	p.Leu2054Pro	ENST00000220676	missense_variant	L/P	cTc/cCc	MODERATE	SNV
RP1	chr8	54622169.0	Missense_Mutation	p.Gly223Val	ENST00000220676	missense_variant	G/V	gGa/gTa	MODERATE	SNV
RP1	chr8	54624866.0	Silent	p.=	ENST00000220676	synonymous_variant	D	gaC/gaT	LOW	SNV
RP1	chr8	54625724.0	Frame_Shift_Del	p.Ser616GlnfsTer30	ENST00000220676	frameshift_variant	H/X	caT/ca	HIGH	deletion
RP1	chr8	54628817.0	Frame_Shift_Del	p.Pro1648LeufsTer62	ENST00000220676	frameshift_variant	S/X	tcT/tc	HIGH	deletion
RP1	chr8	54621577.0	Missense_Mutation	p.Arg204Met	ENST00000220676	missense_variant	R/M	aGg/aTg	MODERATE	SNV
RP1	chr8	54628035.0	Missense_Mutation	p.Asn1385His	ENST00000220676	missense_variant	N/H	Aat/Cat	MODERATE	SNV
RP1	chr8	54621569.0	Silent	p.=	ENST00000220676	synonymous_variant	T	acG/acA	LOW	SNV
RP1	chr8	54621397.0	Missense_Mutation	p.Val144Ala	ENST00000220676	missense_variant	V/A	gTc/gCc	MODERATE	SNV
RP1	chr8	54629152.0	Missense_Mutation	p.Ser1757Leu	ENST00000220676	missense_variant	S/L	tCa/tTa	MODERATE	SNV
RP1	chr8	54628023.0	Missense_Mutation	p.Lys1381Glu	ENST00000220676	missense_variant	K/E	Aaa/Gaa	MODERATE	SNV
RP1	chr8	54622205.0	Frame_Shift_Del	p.Lys236AsnfsTer28	ENST00000220676	frameshift_variant	Q/X	cAa/ca	HIGH	deletion
RP1	chr8	54626158.0	Missense_Mutation	p.Arg759Ile	ENST00000220676	missense_variant	R/I	aGa/aTa	MODERATE	SNV
RP1	chr8	54628587.0	Missense_Mutation	p.Thr1569Pro	ENST00000220676	missense_variant	T/P	Act/Cct	MODERATE	SNV
RP1	chr8	54629277.0	Nonsense_Mutation	p.Glu1799Ter	ENST00000220676	stop_gained	E/*	Gaa/Taa	HIGH	SNV
RP1	chr8	54630345.0	Missense_Mutation	p.Asp2155Tyr	ENST00000220676	missense_variant	D/Y	Gat/Tat	MODERATE	SNV
RP1	chr8	54621225.0	Missense_Mutation	p.Arg87Trp	ENST00000220676	missense_variant	R/W	Cgg/Tgg	MODERATE	SNV
RP1	chr8	54629570.0	Missense_Mutation	p.Met1896Ile	ENST00000220676	missense_variant	M/I	atG/atA	MODERATE	SNV
RP1	chr8	54621076.0	Missense_Mutation	p.Arg37Gln	ENST00000220676	missense_variant	R/Q	cGa/cAa	MODERATE	SNV
RP1	chr8	54628179.0	Missense_Mutation	p.Ala1433Thr	ENST00000220676	missense_variant	A/T	Gca/Aca	MODERATE	SNV
RP1	chr8	54629782.0	Missense_Mutation	p.Phe1967Ser	ENST00000220676	missense_variant	F/S	tTc/tCc	MODERATE	SNV
RP1	chr8	54629028.0	Missense_Mutation	p.Gly1716Ser	ENST00000220676	missense_variant	G/S	Ggt/Agt	MODERATE	SNV
RP1	chr8	54629679.0	Nonsense_Mutation	p.Arg1933Ter	ENST00000220676	stop_gained	R/*	Cga/Tga	HIGH	SNV
RP1	chr8	54621516.0	Missense_Mutation	p.Leu184Ile	ENST00000220676	missense_variant	L/I	Cta/Ata	MODERATE	SNV
RP1	chr8	54625916.0	Silent	p.=	ENST00000220676	synonymous_variant	Q	caG/caA	LOW	SNV
RP1	chr8	54628056.0	Missense_Mutation	p.Asn1392Asp	ENST00000220676	missense_variant	N/D	Aat/Gat	MODERATE	SNV
RP1	chr8	54630039.0	Missense_Mutation	p.Asp2053His	ENST00000220676	missense_variant	D/H	Gac/Cac	MODERATE	SNV
RP1	chr8	54621113.0	Silent	p.=	ENST00000220676	synonymous_variant	G	ggC/ggT	LOW	SNV
RP1	chr8	54627825.0	Frame_Shift_Ins	p.Cys1315TyrfsTer12	ENST00000220676	frameshift_variant	C/YLQX	tgt/tATTTACAgt	HIGH	insertion
RP1	chr8	54628358.0	Frame_Shift_Ins	p.Leu1493ValfsTer4	ENST00000220676	frameshift_variant	-/VRX	-/GTCCGTGG	HIGH	insertion
RP1	chr8	54625228.0	Missense_Mutation	p.Pro449His	ENST00000220676	missense_variant	P/H	cCc/cAc	MODERATE	SNV
RP1	chr8	54628227.0	Missense_Mutation	p.Gly1449Cys	ENST00000220676	missense_variant	G/C	Ggc/Tgc	MODERATE	SNV
RP1	chr8	54628228.0	Missense_Mutation	p.Gly1449Val	ENST00000220676	missense_variant	G/V	gGc/gTc	MODERATE	SNV
RP1	chr8	54621418.0	Missense_Mutation	p.Arg151His	ENST00000220676	missense_variant	R/H	cGc/cAc	MODERATE	SNV
RP1	chr8	54626576.0	Frame_Shift_Ins	p.Pro901ThrfsTer2	ENST00000220676	frameshift_variant	-/X	-/A	HIGH	insertion
COL11A1	chr1	102898154.0	Missense_Mutation	p.Ala1425Thr	ENST00000370096	missense_variant	A/T	Gca/Aca	MODERATE	SNV
COL11A1	chr1	102881713.0	Missense_Mutation	p.Phe1675Cys	ENST00000370096	missense_variant	F/C	tTt/tGt	MODERATE	SNV
COL11A1	chr1	103018849.0	Missense_Mutation	p.Val440Gly	ENST00000370096	missense_variant	V/G	gTc/gGc	MODERATE	SNV
COL11A1	chr1	103025531.0	Missense_Mutation	p.Gly327Glu	ENST00000370096	missense_variant	G/E	gGg/gAg	MODERATE	SNV
COL11A1	chr1	103026214.0	Splice_Site		ENST00000370096	splice_donor_variant			HIGH	SNV
COL11A1	chr1	103108224.0	5'UTR		ENST00000370096	5_prime_UTR_variant			MODIFIER	SNV
COL11A1	chr1	103002768.0	Silent	p.=	ENST00000370096	synonymous_variant	P	ccC/ccA	LOW	SNV
COL11A1	chr1	102881763.0	Splice_Region	p.=	ENST00000370096	splice_region_variant;synonymous_variant	V	gtA/gtG	LOW	SNV
COL11A1	chr1	103006303.0	Missense_Mutation	p.Val566Ile	ENST00000370096	missense_variant	V/I	Gtc/Atc	MODERATE	SNV
COL11A1	chr1	102940424.0	Frame_Shift_Del	p.Gly1096ValfsTer102	ENST00000370096	frameshift_variant	G/X	gGt/gt	HIGH	deletion
COL11A1	chr1	103078802.0	Missense_Mutation	p.Leu115His	ENST00000370096	missense_variant	L/H	cTt/cAt	MODERATE	SNV
COL11A1	chr1	103108241.0	5'UTR		ENST00000370096	5_prime_UTR_variant			MODIFIER	SNV
COL11A1	chr1	102978738.0	Silent	p.=	ENST00000370096	synonymous_variant	G	ggC/ggT	LOW	SNV
COL11A1	chr1	102879904.0	Missense_Mutation	p.Asp1685Tyr	ENST00000370096	missense_variant	D/Y	Gat/Tat	MODERATE	SNV
COL11A1	chr1	102946899.0	Missense_Mutation	p.Arg1076Cys	ENST00000370096	missense_variant	R/C	Cgc/Tgc	MODERATE	SNV
COL11A1	chr1	103015740.0	Splice_Region	p.=	ENST00000370096	splice_region_variant;synonymous_variant	G	ggC/ggT	LOW	SNV
COL11A1	chr1	103074717.0	Missense_Mutation	p.Lys184Asn	ENST00000370096	missense_variant	K/N	aaG/aaT	MODERATE	SNV
COL11A1	chr1	103022849.0	Missense_Mutation	p.Glu380Lys	ENST00000370096	missense_variant	E/K	Gaa/Aaa	MODERATE	SNV
COL11A1	chr1	102879751.0	Nonsense_Mutation	p.Gly1736Ter	ENST00000370096	stop_gained	G/*	Gga/Tga	HIGH	SNV
COL11A1	chr1	102887005.0	Frame_Shift_Del	p.Thr1554ArgfsTer33	ENST00000370096	frameshift_variant	T/X	Acg/cg	HIGH	deletion
COL11A1	chr1	102995865.0	Frame_Shift_Del	p.Lys780ArgfsTer15	ENST00000370096	frameshift_variant;splice_region_variant	K/X	aAg/ag	HIGH	deletion
COL11A1	chr1	103108302.0	5'UTR		ENST00000370096	5_prime_UTR_variant			MODIFIER	SNV
COL11A1	chr1	102978732.0	Silent	p.=	ENST00000370096	synonymous_variant	G	ggC/ggT	LOW	SNV
COL11A1	chr1	102879831.0	Frame_Shift_Del	p.Asn1709IlefsTer76	ENST00000370096	frameshift_variant	N/X	aAt/at	HIGH	deletion
COL11A1	chr1	103008510.0	Frame_Shift_Ins	p.Pro546AlafsTer9	ENST00000370096	frameshift_variant	-/X	-/G	HIGH	insertion
COL11A1	chr1	102879804.0	Missense_Mutation	p.Ala1718Val	ENST00000370096	missense_variant	A/V	gCa/gTa	MODERATE	SNV
COL11A1	chr1	103008510.0	Missense_Mutation	p.Pro546Ala	ENST00000370096	missense_variant	P/A	Cct/Gct	MODERATE	SNV
COL11A1	chr1	102879876.0	Missense_Mutation	p.Val1694Ala	ENST00000370096	missense_variant	V/A	gTg/gCg	MODERATE	SNV
COL11A1	chr1	103025872.0	Intron		ENST00000370096	intron_variant			MODIFIER	deletion
COL11A1	chr1	102915670.0	Missense_Mutation	p.Glu1259Asp	ENST00000370096	missense_variant	E/D	gaA/gaC	MODERATE	SNV
COL11A1	chr1	103022945.0	Missense_Mutation	p.Tyr348Asp	ENST00000370096	missense_variant	Y/D	Tat/Gat	MODERATE	SNV
COL11A1	chr1	102877901.0	3'UTR		ENST00000370096	3_prime_UTR_variant			MODIFIER	SNV
COL11A1	chr1	103005876.0	Missense_Mutation	p.Asp603Asn	ENST00000370096	missense_variant	D/N	Gat/Aat	MODERATE	SNV
COL11A1	chr1	102912212.0	Missense_Mutation	p.Gly1345Cys	ENST00000370096	missense_variant;splice_region_variant	G/C	Ggt/Tgt	MODERATE	SNV
COL11A1	chr1	102886888.0	Missense_Mutation	p.Met1593Leu	ENST00000370096	missense_variant	M/L	Atg/Ctg	MODERATE	SNV
COL11A1	chr1	102939059.0	Silent	p.=	ENST00000370096	synonymous_variant	G	ggC/ggT	LOW	SNV
COL11A1	chr1	102946912.0	Missense_Mutation	p.Ile1071Met	ENST00000370096	missense_variant	I/M	atT/atG	MODERATE	SNV
COL11A1	chr1	103004659.0	Splice_Region	p.=	ENST00000370096	splice_region_variant;synonymous_variant	G	ggT/ggC	LOW	SNV
COL11A1	chr1	103025943.0	Intron		ENST00000370096	intron_variant			MODIFIER	SNV
COL11A1	chr1	102886993.0	Missense_Mutation	p.Thr1558Pro	ENST00000370096	missense_variant	T/P	Act/Cct	MODERATE	SNV
COL11A1	chr1	102946850.0	Missense_Mutation	p.Pro1092Leu	ENST00000370096	missense_variant;splice_region_variant	P/L	cCt/cTt	MODERATE	SNV
COL11A1	chr1	103022889.0	Silent	p.=	ENST00000370096	synonymous_variant	D	gaC/gaT	LOW	SNV
COL11A1	chr1	102996000.0	Missense_Mutation	p.Arg762Trp	ENST00000370096	missense_variant	R/W	Cgg/Tgg	MODERATE	SNV
COL11A1	chr1	103026301.0	Missense_Mutation	p.Tyr271Ser	ENST00000370096	missense_variant	Y/S	tAt/tCt	MODERATE	SNV
COL11A1	chr1	103018847.0	Missense_Mutation	p.Glu441Lys	ENST00000370096	missense_variant	E/K	Gaa/Aaa	MODERATE	SNV
COL11A1	chr1	103018829.0	Missense_Mutation	p.Ala447Thr	ENST00000370096	missense_variant	A/T	Gca/Aca	MODERATE	SNV
COL11A1	chr1	102914384.0	Missense_Mutation	p.Asp1316His	ENST00000370096	missense_variant	D/H	Gat/Cat	MODERATE	SNV
COL11A1	chr1	103022981.0	Nonsense_Mutation	p.Glu336Ter	ENST00000370096	stop_gained	E/*	Gaa/Taa	HIGH	SNV
COL11A1	chr1	102879702.0	Missense_Mutation	p.Thr1752Lys	ENST00000370096	missense_variant	T/K	aCa/aAa	MODERATE	SNV
COL11A1	chr1	103006082.0	Nonsense_Mutation	p.Glu593Ter	ENST00000370096	stop_gained	E/*	Gaa/Taa	HIGH	SNV
COL11A1	chr1	103025855.0	Intron		ENST00000370096	intron_variant			MODIFIER	SNV
COL11A1	chr1	102888628.0	Splice_Region	p.=	ENST00000370096	splice_region_variant;synonymous_variant	G	ggA/ggG	LOW	SNV
COL11A1	chr1	102921546.0	Missense_Mutation	p.Arg1227Ile	ENST00000370096	missense_variant	R/I	aGa/aTa	MODERATE	SNV
COL11A1	chr1	103004461.0	Missense_Mutation	p.Gly643Ser	ENST00000370096	missense_variant	G/S	Ggt/Agt	MODERATE	SNV
COL11A1	chr1	102987707.0	Missense_Mutation	p.Asp810Tyr	ENST00000370096	missense_variant	D/Y	Gat/Tat	MODERATE	SNV
COL11A1	chr1	103014543.0	Missense_Mutation	p.Ala514Thr	ENST00000370096	missense_variant	A/T	Gct/Act	MODERATE	SNV
COL11A1	chr1	102881739.0	Missense_Mutation	p.Glu1666Asp	ENST00000370096	missense_variant	E/D	gaG/gaT	MODERATE	SNV
COL11A1	chr1	103031138.0	Missense_Mutation	p.Ala253Val	ENST00000370096	missense_variant	A/V	gCt/gTt	MODERATE	SNV
COL11A1	chr1	103025858.0	Intron		ENST00000370096	intron_variant			MODIFIER	SNV
COL11A1	chr1	102940435.0	Splice_Site		ENST00000370096	splice_acceptor_variant			HIGH	SNV
COL11A1	chr1	102879829.0	Missense_Mutation	p.Phe1710Val	ENST00000370096	missense_variant	F/V	Ttc/Gtc	MODERATE	SNV
COL11A1	chr1	103014591.0	Missense_Mutation	p.Arg498Cys	ENST00000370096	missense_variant	R/C	Cgt/Tgt	MODERATE	SNV
COL11A1	chr1	103022850.0	Silent	p.=	ENST00000370096	synonymous_variant	G	ggC/ggT	LOW	SNV
COL11A1	chr1	103008511.0	Frame_Shift_Del	p.Pro546LeufsTer87	ENST00000370096	frameshift_variant	G/X	ggG/gg	HIGH	deletion
COL11A1	chr1	103012424.0	Missense_Mutation	p.Pro540Ser	ENST00000370096	missense_variant	P/S	Cca/Tca	MODERATE	SNV
COL11A1	chr1	102888735.0	Silent	p.=	ENST00000370096	synonymous_variant	N	aaC/aaT	LOW	SNV
COL11A1	chr1	103108112.0	Missense_Mutation	p.Ala23Thr	ENST00000370096	missense_variant	A/T	Gca/Aca	MODERATE	SNV
COL11A1	chr1	103025534.0	Missense_Mutation	p.Ser326Phe	ENST00000370096	missense_variant	S/F	tCt/tTt	MODERATE	SNV
ROBO2	chr3	77098247.0	Missense_Mutation	p.Arg99Cys	ENST00000461745	missense_variant	R/C	Cgc/Tgc	MODERATE	SNV
ROBO2	chr3	77635011.0	Missense_Mutation	p.Ala1301Val	ENST00000461745	missense_variant	A/V	gCa/gTa	MODERATE	SNV
ROBO2	chr3	77098160.0	Nonsense_Mutation	p.Arg70Ter	ENST00000461745	stop_gained	R/*	Cga/Tga	HIGH	SNV
ROBO2	chr3	77617822.0	Intron		ENST00000461745	intron_variant			MODIFIER	SNV
ROBO2	chr3	77622341.0	Silent	p.=	ENST00000461745	synonymous_variant	D	gaC/gaT	LOW	SNV
ROBO2	chr3	77481117.0	Missense_Mutation	p.Met189Val	ENST00000461745	missense_variant	M/V	Atg/Gtg	MODERATE	SNV
ROBO2	chr3	77574602.0	Missense_Mutation	p.Pro692Leu	ENST00000461745	missense_variant	P/L	cCg/cTg	MODERATE	SNV
ROBO2	chr3	77617656.0	Missense_Mutation	p.Gly1146Glu	ENST00000461745	missense_variant	G/E	gGa/gAa	MODERATE	SNV
ROBO2	chr3	77617798.0	Intron		ENST00000461745	intron_variant			MODIFIER	SNV
ROBO2	chr3	77564986.0	Missense_Mutation	p.Ala572Glu	ENST00000461745	missense_variant	A/E	gCa/gAa	MODERATE	SNV
ROBO2	chr3	77588824.0	Missense_Mutation	p.Gln858His	ENST00000461745	missense_variant	Q/H	caA/caC	MODERATE	SNV
ROBO2	chr3	77098316.0	Nonsense_Mutation	p.Arg122Ter	ENST00000461745	stop_gained	R/*	Cga/Tga	HIGH	SNV
ROBO2	chr3	77563188.0	Missense_Mutation	p.Lys514Thr	ENST00000461745	missense_variant	K/T	aAa/aCa	MODERATE	SNV
ROBO2	chr3	77574611.0	Missense_Mutation	p.Arg695Gln	ENST00000461745	missense_variant	R/Q	cGa/cAa	MODERATE	SNV
ROBO2	chr3	77522856.0	Missense_Mutation	p.Glu296Asp	ENST00000461745	missense_variant	E/D	gaG/gaT	MODERATE	SNV
ROBO2	chr3	77098324.0	Silent	p.=	ENST00000461745	synonymous_variant	A	gcG/gcA	LOW	SNV
ROBO2	chr3	77596695.0	Missense_Mutation	p.Leu933Phe	ENST00000461745	missense_variant	L/F	ttG/ttT	MODERATE	SNV
ROBO2	chr3	77596702.0	Missense_Mutation	p.Asn936His	ENST00000461745	missense_variant	N/H	Aat/Cat	MODERATE	SNV
ROBO2	chr3	77644819.0	Silent	p.=	ENST00000461745	synonymous_variant	R	agA/agG	LOW	SNV
ROBO2	chr3	77580008.0	Missense_Mutation	p.Arg797Gln	ENST00000461745	missense_variant	R/Q	cGg/cAg	MODERATE	SNV
ROBO2	chr3	77602267.0	Missense_Mutation	p.Gly971Glu	ENST00000461745	missense_variant	G/E	gGa/gAa	MODERATE	SNV
ROBO2	chr3	77596691.0	Missense_Mutation	p.Ser932Thr	ENST00000461745	missense_variant	S/T	aGc/aCc	MODERATE	SNV
ROBO2	chr3	77595143.0	Frame_Shift_Ins	p.Thr896AsnfsTer23	ENST00000461745	frameshift_variant;splice_region_variant	-/X	-/A	HIGH	insertion
ROBO2	chr3	77580118.0	Missense_Mutation	p.Gly834Arg	ENST00000461745	missense_variant;splice_region_variant	G/R	Ggg/Cgg	MODERATE	SNV
ROBO2	chr3	77098130.0	Missense_Mutation	p.Pro60Ser	ENST00000461745	missense_variant	P/S	Ccc/Tcc	MODERATE	SNV
ROBO2	chr3	77563302.0	Missense_Mutation	p.Ala552Glu	ENST00000461745	missense_variant	A/E	gCa/gAa	MODERATE	SNV
ROBO2	chr3	77040706.0	5'UTR		ENST00000461745	5_prime_UTR_variant			MODIFIER	deletion
ROBO2	chr3	77588934.0	Splice_Site		ENST00000461745	splice_donor_variant;intron_variant			HIGH	deletion
ROBO2	chr3	77577505.0	Missense_Mutation	p.Pro740Arg	ENST00000461745	missense_variant	P/R	cCa/cGa	MODERATE	SNV
ROBO2	chr3	77098129.0	Silent	p.=	ENST00000461745	synonymous_variant	T	acG/acA	LOW	SNV
ROBO2	chr3	77622358.0	Missense_Mutation	p.Glu1229Ala	ENST00000461745	missense_variant	E/A	gAa/gCa	MODERATE	SNV
ROBO2	chr3	77617627.0	Silent	p.=	ENST00000461745	synonymous_variant	G	ggC/ggT	LOW	SNV
ROBO2	chr3	77558147.0	Missense_Mutation	p.Arg479Trp	ENST00000461745	missense_variant;splice_region_variant	R/W	Cgg/Tgg	MODERATE	SNV
ROBO2	chr3	77622338.0	Silent	p.=	ENST00000461745	synonymous_variant	D	gaC/gaT	LOW	SNV
ROBO2	chr3	77634974.0	Frame_Shift_Del	p.Lys1290AsnfsTer20	ENST00000461745	frameshift_variant	K/X	Aaa/aa	HIGH	deletion
ROBO2	chr3	77493351.0	Frame_Shift_Del	p.Lys260ArgfsTer19	ENST00000461745	frameshift_variant	K/X	Aaa/aa	HIGH	deletion
ROBO2	chr3	77646195.0	3'UTR		ENST00000461745	3_prime_UTR_variant			MODIFIER	SNV
ROBO2	chr3	77607886.0	Frame_Shift_Ins	p.Val1079SerfsTer22	ENST00000461745	frameshift_variant	-/X	-/C	HIGH	insertion
ROBO2	chr3	77634993.0	Missense_Mutation	p.Arg1295Gln	ENST00000461745	missense_variant	R/Q	cGg/cAg	MODERATE	SNV
ROBO2	chr3	77580078.0	Frame_Shift_Ins	p.Gly821TrpfsTer7	ENST00000461745	frameshift_variant	-/X	-/T	HIGH	insertion
ROBO2	chr3	77546436.0	Frame_Shift_Ins	p.Trp347LeufsTer21	ENST00000461745	frameshift_variant	V/VX	gtt/gTtt	HIGH	insertion
ROBO2	chr3	77579972.0	Missense_Mutation	p.Arg785Gln	ENST00000461745	missense_variant	R/Q	cGa/cAa	MODERATE	SNV
ROBO2	chr3	77098310.0	Missense_Mutation	p.Val120Leu	ENST00000461745	missense_variant	V/L	Gtg/Ctg	MODERATE	SNV
ROBO2	chr3	77098122.0	Missense_Mutation	p.Arg57Gln	ENST00000461745	missense_variant	R/Q	cGg/cAg	MODERATE	SNV
ROBO2	chr3	77550907.0	Silent	p.=	ENST00000461745	synonymous_variant	R	cgT/cgA	LOW	SNV
ROBO2	chr3	77577498.0	Frame_Shift_Ins	p.Pro740ThrfsTer14	ENST00000461745	frameshift_variant	A/AX	gcc/gCcc	HIGH	insertion
ROBO2	chr3	77622308.0	Missense_Mutation	p.Leu1212Phe	ENST00000461745	missense_variant	L/F	ttG/ttT	MODERATE	SNV
ROBO2	chr3	77040770.0	5'UTR		ENST00000461745	5_prime_UTR_variant			MODIFIER	deletion
ROBO2	chr3	77098076.0	Missense_Mutation	p.Val42Ile	ENST00000461745	missense_variant	V/I	Gtc/Atc	MODERATE	SNV
ROBO2	chr3	77644825.0	Silent	p.=	ENST00000461745	synonymous_variant	G	ggC/ggA	LOW	SNV
ROBO2	chr3	77550905.0	Missense_Mutation	p.Arg383Cys	ENST00000461745	missense_variant	R/C	Cgt/Tgt	MODERATE	SNV
ROBO2	chr3	77477542.0	Nonsense_Mutation	p.Arg173Ter	ENST00000461745	stop_gained	R/*	Cga/Tga	HIGH	SNV
ROBO2	chr3	77493273.0	Missense_Mutation	p.Asn233Asp	ENST00000461745	missense_variant	N/D	Aac/Gac	MODERATE	SNV
ROBO2	chr3	77562729.0	Missense_Mutation	p.Thr506Ala	ENST00000461745	missense_variant	T/A	Aca/Gca	MODERATE	SNV
ROBO2	chr3	77040735.0	5'UTR		ENST00000461745	5_prime_UTR_variant			MODIFIER	SNV
ROBO2	chr3	77574664.0	Missense_Mutation	p.Arg713Trp	ENST00000461745	missense_variant	R/W	Cgg/Tgg	MODERATE	SNV
ROBO2	chr3	77477464.0	Missense_Mutation	p.Gly147Arg	ENST00000461745	missense_variant	G/R	Gga/Cga	MODERATE	SNV
ROBO2	chr3	77617622.0	Nonsense_Mutation	p.Arg1135Ter	ENST00000461745	stop_gained	R/*	Cga/Tga	HIGH	SNV
ROBO2	chr3	77565088.0	Missense_Mutation	p.Pro606Leu	ENST00000461745	missense_variant	P/L	cCa/cTa	MODERATE	SNV
ROBO2	chr3	77588927.0	Missense_Mutation	p.Tyr893Asp	ENST00000461745	missense_variant	Y/D	Tat/Gat	MODERATE	SNV
ROBO2	chr3	77588928.0	In_Frame_Ins	p.Tyr893_Ala894insAsnPheIle	ENST00000461745	inframe_insertion	Y/YNFI	tat/taCAACTTCATt	MODERATE	insertion
ROBO2	chr3	77646140.0	3'UTR		ENST00000461745	3_prime_UTR_variant			MODIFIER	insertion
ROBO2	chr3	77634965.0	Missense_Mutation	p.Arg1286Trp	ENST00000461745	missense_variant	R/W	Cgg/Tgg	MODERATE	SNV
ROBO2	chr3	77562687.0	Missense_Mutation	p.Ser492Arg	ENST00000461745	missense_variant	S/R	Agt/Cgt	MODERATE	SNV
ROBO2	chr3	77607915.0	Missense_Mutation	p.Thr1085Met	ENST00000461745	missense_variant	T/M	aCg/aTg	MODERATE	SNV
ROBO2	chr3	77481103.0	Missense_Mutation	p.Arg184His	ENST00000461745	missense_variant	R/H	cGt/cAt	MODERATE	SNV
ROBO2	chr3	77644821.0	Missense_Mutation	p.Ala1351Glu	ENST00000461745	missense_variant	A/E	gCa/gAa	MODERATE	SNV
ROBO2	chr3	77607890.0	Missense_Mutation	p.Pro1077Ala	ENST00000461745	missense_variant	P/A	Ccc/Gcc	MODERATE	SNV
ABCA12	chr2	215001683.0	Frame_Shift_Ins	p.Thr913SerfsTer16	ENST00000272895	frameshift_variant	T/SX	aca/aGca	HIGH	insertion
ABCA12	chr2	214980586.0	Missense_Mutation	p.Arg1546His	ENST00000272895	missense_variant	R/H	cGc/cAc	MODERATE	SNV
ABCA12	chr2	214980560.0	Missense_Mutation	p.Leu1555Ile	ENST00000272895	missense_variant	L/I	Ctt/Att	MODERATE	SNV
ABCA12	chr2	214932712.0	Silent	p.=	ENST00000272895	synonymous_variant	K	aaG/aaA	LOW	SNV
ABCA12	chr2	214956759.0	Missense_Mutation	p.Val2046Ala	ENST00000272895	missense_variant	V/A	gTa/gCa	MODERATE	SNV
ABCA12	chr2	215000804.0	Missense_Mutation	p.Ser1027Ile	ENST00000272895	missense_variant	S/I	aGt/aTt	MODERATE	SNV
ABCA12	chr2	214989363.0	Missense_Mutation	p.Phe1265Leu	ENST00000272895	missense_variant	F/L	ttC/ttA	MODERATE	SNV
ABCA12	chr2	214990779.0	Missense_Mutation	p.Tyr1183His	ENST00000272895	missense_variant	Y/H	Tac/Cac	MODERATE	SNV
ABCA12	chr2	215019562.0	Missense_Mutation	p.Lys508Glu	ENST00000272895	missense_variant	K/E	Aaa/Gaa	MODERATE	SNV
ABCA12	chr2	214978943.0	Missense_Mutation	p.Gly1613Glu	ENST00000272895	missense_variant	G/E	gGg/gAg	MODERATE	SNV
ABCA12	chr2	215000910.0	Missense_Mutation	p.Ala992Thr	ENST00000272895	missense_variant	A/T	Gca/Aca	MODERATE	SNV
ABCA12	chr2	215052501.0	Missense_Mutation	p.Leu165Ile	ENST00000272895	missense_variant	L/I	Ctt/Att	MODERATE	SNV
ABCA12	chr2	214955268.0	Frame_Shift_Del	p.Phe2109LeufsTer25	ENST00000272895	frameshift_variant	F/X	ttT/tt	HIGH	deletion
ABCA12	chr2	215025728.0	Missense_Mutation	p.Arg411His	ENST00000272895	missense_variant	R/H	cGc/cAc	MODERATE	SNV
ABCA12	chr2	215015633.0	Missense_Mutation	p.Cys605Gly	ENST00000272895	missense_variant	C/G	Tgt/Ggt	MODERATE	SNV
ABCA12	chr2	215045978.0	Missense_Mutation	p.Gln244Pro	ENST00000272895	missense_variant	Q/P	cAg/cCg	MODERATE	SNV
ABCA12	chr2	215049728.0	Missense_Mutation	p.Phe197Leu	ENST00000272895	missense_variant	F/L	ttC/ttA	MODERATE	SNV
ABCA12	chr2	214966859.0	Missense_Mutation	p.Ala1958Val	ENST00000272895	missense_variant	A/V	gCt/gTt	MODERATE	SNV
ABCA12	chr2	215011513.0	Missense_Mutation	p.His753Arg	ENST00000272895	missense_variant	H/R	cAc/cGc	MODERATE	SNV
ABCA12	chr2	215064213.0	Missense_Mutation	p.Leu57His	ENST00000272895	missense_variant	L/H	cTc/cAc	MODERATE	SNV
ABCA12	chr2	214980622.0	Frame_Shift_Ins	p.Thr1534AsnfsTer8	ENST00000272895	frameshift_variant	T/NX	acg/aAcg	HIGH	insertion
ABCA12	chr2	214970273.0	Frame_Shift_Ins	p.Arg1897LysfsTer18	ENST00000272895	frameshift_variant;splice_region_variant	R/KX	aga/aAga	HIGH	insertion
ABCA12	chr2	214983700.0	Silent	p.=	ENST00000272895	synonymous_variant	G	ggT/ggC	LOW	SNV
ABCA12	chr2	214951082.0	Frame_Shift_Ins	p.Leu2217SerfsTer7	ENST00000272895	frameshift_variant;splice_region_variant	-/X	-/T	HIGH	insertion
ABCA12	chr2	215025750.0	Nonsense_Mutation	p.Arg404Ter	ENST00000272895	stop_gained	R/*	Cga/Tga	HIGH	SNV
ABCA12	chr2	215004208.0	Splice_Site		ENST00000272895	splice_donor_variant			HIGH	SNV
ABCA12	chr2	214990807.0	Frame_Shift_Ins	p.Asn1173LysfsTer27	ENST00000272895	frameshift_variant	N/KX	aac/aaAc	HIGH	insertion
ABCA12	chr2	215011532.0	Missense_Mutation	p.Gln747Lys	ENST00000272895	missense_variant	Q/K	Cag/Aag	MODERATE	SNV
ABCA12	chr2	215045919.0	Missense_Mutation	p.Gln264Lys	ENST00000272895	missense_variant	Q/K	Cag/Aag	MODERATE	SNV
ABCA12	chr2	214980594.0	Silent	p.=	ENST00000272895	synonymous_variant	L	ctG/ctA	LOW	SNV
ABCA12	chr2	215018105.0	Missense_Mutation	p.Val562Ala	ENST00000272895	missense_variant	V/A	gTt/gCt	MODERATE	SNV
ABCA12	chr2	214959067.0	Missense_Mutation	p.Tyr1966His	ENST00000272895	missense_variant	Y/H	Tat/Cat	MODERATE	SNV
ABCA12	chr2	215019702.0	Missense_Mutation	p.Gly461Glu	ENST00000272895	missense_variant	G/E	gGg/gAg	MODERATE	SNV
ABCA12	chr2	214997747.0	Missense_Mutation	p.Ile1081Thr	ENST00000272895	missense_variant	I/T	aTa/aCa	MODERATE	SNV
ABCA12	chr2	214974853.0	Missense_Mutation	p.Pro1798Leu	ENST00000272895	missense_variant	P/L	cCg/cTg	MODERATE	SNV
ABCA12	chr2	214980587.0	Missense_Mutation	p.Arg1546Cys	ENST00000272895	missense_variant	R/C	Cgc/Tgc	MODERATE	SNV
ABCA12	chr2	215001014.0	Frame_Shift_Ins	p.Ile957SerfsTer3	ENST00000272895	frameshift_variant	I/SX	att/aGtt	HIGH	insertion
ABCA12	chr2	214945054.0	Missense_Mutation	p.Lys2430Asn	ENST00000272895	missense_variant	K/N	aaG/aaT	MODERATE	SNV
ABCA12	chr2	214958362.0	Missense_Mutation	p.Glu2011Gly	ENST00000272895	missense_variant	E/G	gAa/gGa	MODERATE	SNV
ABCA12	chr2	214975859.0	Silent	p.=	ENST00000272895	synonymous_variant	N	aaT/aaC	LOW	SNV
ABCA12	chr2	214978355.0	Missense_Mutation	p.Asp1697Asn	ENST00000272895	missense_variant	D/N	Gat/Aat	MODERATE	SNV
ABCA12	chr2	215000964.0	Missense_Mutation	p.Asn974His	ENST00000272895	missense_variant	N/H	Aat/Cat	MODERATE	SNV
ABCA12	chr2	215001738.0	Splice_Site		ENST00000272895	splice_acceptor_variant			HIGH	SNV
ABCA12	chr2	215025749.0	Missense_Mutation	p.Arg404Gln	ENST00000272895	missense_variant	R/Q	cGa/cAa	MODERATE	SNV
ABCA12	chr2	215049736.0	Missense_Mutation	p.Asp195Tyr	ENST00000272895	missense_variant	D/Y	Gat/Tat	MODERATE	SNV
ABCA12	chr2	215064204.0	Missense_Mutation	p.Arg60Gln	ENST00000272895	missense_variant	R/Q	cGa/cAa	MODERATE	SNV
ABCA12	chr2	215138233.0	5'UTR		ENST00000272895	5_prime_UTR_variant			MODIFIER	SNV
ABCA12	chr2	215052530.0	Frame_Shift_Del	p.Phe155SerfsTer17	ENST00000272895	frameshift_variant	F/X	tTc/tc	HIGH	deletion
ABCA12	chr2	215049693.0	Missense_Mutation	p.Lys209Arg	ENST00000272895	missense_variant	K/R	aAa/aGa	MODERATE	SNV
ABCA12	chr2	214945078.0	Silent	p.=	ENST00000272895	synonymous_variant	P	ccG/ccA	LOW	SNV
ABCA12	chr2	214986696.0	Missense_Mutation	p.Pro1337Thr	ENST00000272895	missense_variant	P/T	Cct/Act	MODERATE	SNV
ABCA12	chr2	214989572.0	Missense_Mutation	p.Arg1225Gln	ENST00000272895	missense_variant	R/Q	cGa/cAa	MODERATE	SNV
ABCA12	chr2	214948727.0	Missense_Mutation	p.His2325Asn	ENST00000272895	missense_variant	H/N	Cac/Aac	MODERATE	SNV
ABCA12	chr2	215010440.0	Missense_Mutation	p.Ile788Asn	ENST00000272895	missense_variant	I/N	aTc/aAc	MODERATE	SNV
ABCA12	chr2	215045927.0	Missense_Mutation	p.Ala261Val	ENST00000272895	missense_variant	A/V	gCt/gTt	MODERATE	SNV
ABCA12	chr2	215049772.0	Nonsense_Mutation	p.Glu183Ter	ENST00000272895	stop_gained	E/*	Gaa/Taa	HIGH	SNV
ABCA12	chr2	214978431.0	Frame_Shift_Ins	p.Asn1671LysfsTer2	ENST00000272895	frameshift_variant	N/KX	aat/aaAt	HIGH	insertion
ABCA12	chr2	215001570.0	Missense_Mutation	p.Glu951Lys	ENST00000272895	missense_variant	E/K	Gaa/Aaa	MODERATE	SNV
ABCA12	chr2	215025736.0	Silent	p.=	ENST00000272895	synonymous_variant	S	tcT/tcG	LOW	SNV
ABCA12	chr2	215064112.0	Missense_Mutation	p.Asp91Tyr	ENST00000272895	missense_variant	D/Y	Gat/Tat	MODERATE	SNV
ABCA12	chr2	214956772.0	Frame_Shift_Ins	p.Tyr2042LeufsTer23	ENST00000272895	frameshift_variant	-/X	-/C	HIGH	insertion
ABCA12	chr2	214956774.0	Nonsense_Mutation	p.Phe2041delinsTer	ENST00000272895	stop_gained	F/*V	ttc/tAAGtc	HIGH	insertion
ABCA12	chr2	215015552.0	Nonsense_Mutation	p.Gln632Ter	ENST00000272895	stop_gained	Q/*	Cag/Tag	HIGH	SNV
ABCA12	chr2	214934162.0	Silent	p.=	ENST00000272895	synonymous_variant	V	gtC/gtT	LOW	SNV
ABCA12	chr2	214945079.0	Missense_Mutation	p.Pro2422Leu	ENST00000272895	missense_variant	P/L	cCg/cTg	MODERATE	SNV
ABCA12	chr2	214937608.0	Nonsense_Mutation	p.Arg2482Ter	ENST00000272895	stop_gained	R/*	Cga/Tga	HIGH	SNV
ZNF469	chr16	88433604.0	Missense_Mutation	p.Ala2017Val	ENST00000437464	missense_variant	A/V	gCc/gTc	MODERATE	SNV
ZNF469	chr16	88436096.0	Missense_Mutation	p.His2848Tyr	ENST00000437464	missense_variant	H/Y	Cat/Tat	MODERATE	SNV
ZNF469	chr16	88437795.0	Frame_Shift_Del	p.Arg3417GlyfsTer56	ENST00000437464	frameshift_variant	R/X	aGg/ag	HIGH	deletion
ZNF469	chr16	88433544.0	Missense_Mutation	p.Ala1997Val	ENST00000437464	missense_variant	A/V	gCg/gTg	MODERATE	SNV
ZNF469	chr16	88429831.0	Silent	p.=	ENST00000437464	synonymous_variant	H	caC/caT	LOW	SNV
ZNF469	chr16	88431003.0	Missense_Mutation	p.Leu1150Arg	ENST00000437464	missense_variant	L/R	cTg/cGg	MODERATE	SNV
ZNF469	chr16	88432349.0	Missense_Mutation	p.Leu1599Phe	ENST00000437464	missense_variant	L/F	Ctc/Ttc	MODERATE	SNV
ZNF469	chr16	88436209.0	Silent	p.=	ENST00000437464	synonymous_variant	S	agC/agT	LOW	SNV
ZNF469	chr16	88431996.0	Missense_Mutation	p.Pro1481Leu	ENST00000437464	missense_variant	P/L	cCg/cTg	MODERATE	SNV
ZNF469	chr16	88439006.0	Silent	p.=	ENST00000437464	synonymous_variant	R	Cgg/Agg	LOW	SNV
ZNF469	chr16	88433884.0	Silent	p.=	ENST00000437464	synonymous_variant	S	tcG/tcA	LOW	SNV
ZNF469	chr16	88438633.0	Silent	p.=	ENST00000437464	synonymous_variant	P	ccC/ccT	LOW	SNV
ZNF469	chr16	88437328.0	Silent	p.=	ENST00000437464	synonymous_variant	A	gcG/gcA	LOW	SNV
ZNF469	chr16	88439369.0	3'UTR		ENST00000437464	3_prime_UTR_variant			MODIFIER	SNV
ZNF469	chr16	88430204.0	Missense_Mutation	p.Arg912Cys	ENST00000437464	missense_variant	R/C	Cgc/Tgc	MODERATE	SNV
ZNF469	chr16	88436595.0	Missense_Mutation	p.Arg3014His	ENST00000437464	missense_variant	R/H	cGt/cAt	MODERATE	SNV
ZNF469	chr16	88435993.0	Silent	p.=	ENST00000437464	synonymous_variant	A	gcC/gcT	LOW	SNV
ZNF469	chr16	88436705.0	Missense_Mutation	p.Glu3051Lys	ENST00000437464	missense_variant	E/K	Gag/Aag	MODERATE	SNV
ZNF469	chr16	88438809.0	Frame_Shift_Ins	p.Ala3754ArgfsTer17	ENST00000437464	frameshift_variant	L/LX	ctc/ctCc	HIGH	insertion
ZNF469	chr16	88428098.0	Frame_Shift_Del	p.Gln212ArgfsTer134	ENST00000437464	frameshift_variant	P/X	Ccc/cc	HIGH	deletion
ZNF469	chr16	88428214.0	Silent	p.=	ENST00000437464	synonymous_variant	F	ttC/ttT	LOW	SNV
ZNF469	chr16	88431273.0	Missense_Mutation	p.Pro1240Gln	ENST00000437464	missense_variant	P/Q	cCg/cAg	MODERATE	SNV
ZNF469	chr16	88439179.0	Silent	p.=	ENST00000437464	synonymous_variant	R	agG/agA	LOW	SNV
ZNF469	chr16	88437282.0	Missense_Mutation	p.Ala3243Val	ENST00000437464	missense_variant	A/V	gCg/gTg	MODERATE	SNV
ZNF469	chr16	88437769.0	Silent	p.=	ENST00000437464	synonymous_variant	F	ttC/ttT	LOW	SNV
ZNF469	chr16	88432064.0	Missense_Mutation	p.Arg1504Trp	ENST00000437464	missense_variant	R/W	Cgg/Tgg	MODERATE	SNV
ZNF469	chr16	88436610.0	Missense_Mutation	p.Glu3019Gly	ENST00000437464	missense_variant	E/G	gAg/gGg	MODERATE	SNV
ZNF469	chr16	88433322.0	Missense_Mutation	p.Ala1923Val	ENST00000437464	missense_variant	A/V	gCc/gTc	MODERATE	SNV
ZNF469	chr16	88436528.0	Missense_Mutation	p.Pro2992Ser	ENST00000437464	missense_variant	P/S	Ccc/Tcc	MODERATE	SNV
ZNF469	chr16	88429426.0	Frame_Shift_Ins	p.His655ProfsTer83	ENST00000437464	frameshift_variant	-/X	-/C	HIGH	insertion
ZNF469	chr16	88429427.0	Frame_Shift_Del	p.His655ThrfsTer77	ENST00000437464	frameshift_variant	P/X	Ccc/cc	HIGH	deletion
ZNF469	chr16	88432316.0	Missense_Mutation	p.Val1588Met	ENST00000437464	missense_variant	V/M	Gtg/Atg	MODERATE	SNV
ZNF469	chr16	88428203.0	Missense_Mutation	p.Gly245Cys	ENST00000437464	missense_variant	G/C	Ggt/Tgt	MODERATE	SNV
ZNF469	chr16	88439000.0	Frame_Shift_Del	p.Arg3818GlyfsTer95	ENST00000437464	frameshift_variant	P/X	Ccc/cc	HIGH	deletion
ZNF469	chr16	88437405.0	Frame_Shift_Del	p.Asp3286ThrfsTer124	ENST00000437464	frameshift_variant	S/X	tCc/tc	HIGH	deletion
ZNF469	chr16	88428659.0	Frame_Shift_Del	p.Pro398LeufsTer104	ENST00000437464	frameshift_variant	P/X	Ccc/cc	HIGH	deletion
ZNF469	chr16	88431424.0	Frame_Shift_Del	p.Pro1292LeufsTer235	ENST00000437464	frameshift_variant	D/X	gaC/ga	HIGH	deletion
ZNF469	chr16	88431808.0	Silent	p.=	ENST00000437464	synonymous_variant	S	tcG/tcA	LOW	SNV
ZNF469	chr16	88428493.0	Missense_Mutation	p.Gln341His	ENST00000437464	missense_variant	Q/H	caG/caT	MODERATE	SNV
ZNF469	chr16	88428075.0	Frame_Shift_Del	p.Arg204GlyfsTer142	ENST00000437464	frameshift_variant	T/X	aCc/ac	HIGH	deletion
ZNF469	chr16	88437173.0	Missense_Mutation	p.Ala3207Thr	ENST00000437464	missense_variant	A/T	Gcg/Acg	MODERATE	SNV
ZNF469	chr16	88436672.0	Missense_Mutation	p.Val3040Met	ENST00000437464	missense_variant	V/M	Gtg/Atg	MODERATE	SNV
ZNF469	chr16	88438444.0	Frame_Shift_Del	p.Arg3634GlufsTer58	ENST00000437464	frameshift_variant	E/X	gaG/ga	HIGH	deletion
ZNF469	chr16	88434167.0	Missense_Mutation	p.Val2205Ile	ENST00000437464	missense_variant	V/I	Gtc/Atc	MODERATE	SNV
ZNF469	chr16	88428909.0	Frame_Shift_Del	p.Leu482CysfsTer20	ENST00000437464	frameshift_variant	A/X	gCc/gc	HIGH	deletion
ZNF469	chr16	88430032.0	Silent	p.=	ENST00000437464	synonymous_variant	Q	caG/caA	LOW	SNV
ZNF469	chr16	88433369.0	Missense_Mutation	p.Leu1939Ile	ENST00000437464	missense_variant	L/I	Ctc/Atc	MODERATE	SNV
ZNF469	chr16	88433167.0	Frame_Shift_Del	p.Ile1874TyrfsTer24	ENST00000437464	frameshift_variant	S/X	agC/ag	HIGH	deletion
ZNF469	chr16	88431801.0	Missense_Mutation	p.Ala1416Val	ENST00000437464	missense_variant	A/V	gCt/gTt	MODERATE	SNV
ZNF469	chr16	88435963.0	Silent	p.=	ENST00000437464	synonymous_variant	V	gtC/gtT	LOW	SNV
ZNF469	chr16	88436557.0	Silent	p.=	ENST00000437464	synonymous_variant	D	gaC/gaT	LOW	SNV
ZNF469	chr16	88428083.0	Frame_Shift_Del	p.Pro206GlnfsTer140	ENST00000437464	frameshift_variant	P/X	Ccc/cc	HIGH	deletion
ZNF469	chr16	88434735.0	Frame_Shift_Del	p.Gln2396LysfsTer49	ENST00000437464	frameshift_variant	S/X	tCc/tc	HIGH	deletion
ZNF469	chr16	88436589.0	Missense_Mutation	p.Pro3012Leu	ENST00000437464	missense_variant	P/L	cCg/cTg	MODERATE	SNV
ZNF469	chr16	88437615.0	Missense_Mutation	p.Ala3354Val	ENST00000437464	missense_variant	A/V	gCa/gTa	MODERATE	SNV
ZNF469	chr16	88436704.0	Silent	p.=	ENST00000437464	synonymous_variant	F	ttC/ttT	LOW	SNV
ZNF469	chr16	88430011.0	Silent	p.=	ENST00000437464	synonymous_variant	A	gcG/gcA	LOW	SNV
ZNF469	chr16	88436200.0	Silent	p.=	ENST00000437464	synonymous_variant	T	acG/acA	LOW	SNV
ZNF469	chr16	88436594.0	Missense_Mutation	p.Arg3014Cys	ENST00000437464	missense_variant	R/C	Cgt/Tgt	MODERATE	SNV
ZNF469	chr16	88434764.0	Missense_Mutation	p.Gln2404Lys	ENST00000437464	missense_variant	Q/K	Cag/Aag	MODERATE	SNV
ZNF469	chr16	88429603.0	Silent	p.=	ENST00000437464	synonymous_variant	P	ccG/ccA	LOW	SNV
ZNF469	chr16	88428565.0	Silent	p.=	ENST00000437464	synonymous_variant	P	ccG/ccA	LOW	SNV
COL27A1	chr9	114231836.0	Silent	p.=	ENST00000356083	synonymous_variant	S	agC/agT	LOW	SNV
COL27A1	chr9	114275735.0	Silent	p.=	ENST00000356083	synonymous_variant	G	ggG/ggC	LOW	SNV
COL27A1	chr9	114168052.0	Missense_Mutation	p.Arg166His	ENST00000356083	missense_variant	R/H	cGc/cAc	MODERATE	SNV
COL27A1	chr9	114275661.0	Missense_Mutation	p.Gly1204Arg	ENST00000356083	missense_variant;splice_region_variant	G/R	Ggg/Agg	MODERATE	SNV
COL27A1	chr9	114217893.0	Intron		ENST00000356083	intron_variant			MODIFIER	SNV
COL27A1	chr9	114309448.0	Missense_Mutation	p.Phe1802Leu	ENST00000356083	missense_variant	F/L	ttC/ttA	MODERATE	SNV
COL27A1	chr9	114309449.0	Missense_Mutation	p.Arg1803Trp	ENST00000356083	missense_variant	R/W	Cgg/Tgg	MODERATE	SNV
COL27A1	chr9	114194445.0	Silent	p.=	ENST00000356083	synonymous_variant	H	caC/caT	LOW	SNV
COL27A1	chr9	114309401.0	Missense_Mutation	p.Arg1787Cys	ENST00000356083	missense_variant	R/C	Cgc/Tgc	MODERATE	SNV
COL27A1	chr9	114245892.0	Silent	p.=	ENST00000356083	synonymous_variant	P	ccG/ccA	LOW	SNV
COL27A1	chr9	114304649.0	Silent	p.=	ENST00000356083	synonymous_variant	D	gaC/gaT	LOW	SNV
COL27A1	chr9	114290824.0	Silent	p.=	ENST00000356083	synonymous_variant	D	gaC/gaT	LOW	SNV
COL27A1	chr9	114290248.0	Missense_Mutation	p.Arg1429Trp	ENST00000356083	missense_variant	R/W	Cgg/Tgg	MODERATE	SNV
COL27A1	chr9	114169435.0	Missense_Mutation	p.Pro627Leu	ENST00000356083	missense_variant	P/L	cCg/cTg	MODERATE	SNV
COL27A1	chr9	114162714.0	Splice_Site	p.Leu24SerfsTer6	ENST00000356083	splice_acceptor_variant			HIGH	deletion
COL27A1	chr9	114168711.0	Missense_Mutation	p.His386Asn	ENST00000356083	missense_variant	H/N	Cat/Aat	MODERATE	SNV
COL27A1	chr9	114267532.0	Missense_Mutation	p.Gly1159Asp	ENST00000356083	missense_variant	G/D	gGc/gAc	MODERATE	SNV
COL27A1	chr9	114169427.0	Missense_Mutation	p.Met624Ile	ENST00000356083	missense_variant	M/I	atG/atT	MODERATE	SNV
COL27A1	chr9	114168866.0	Silent	p.=	ENST00000356083	synonymous_variant	P	ccG/ccA	LOW	SNV
COL27A1	chr9	114237698.0	Missense_Mutation	p.Gly904Arg	ENST00000356083	missense_variant	G/R	Ggg/Agg	MODERATE	SNV
COL27A1	chr9	114169019.0	Silent	p.=	ENST00000356083	synonymous_variant	S	tcC/tcA	LOW	SNV
COL27A1	chr9	114243555.0	Missense_Mutation	p.Val977Met	ENST00000356083	missense_variant	V/M	Gtg/Atg	MODERATE	SNV
COL27A1	chr9	114194441.0	Missense_Mutation	p.Ala685Val	ENST00000356083	missense_variant	A/V	gCc/gTc	MODERATE	SNV
COL27A1	chr9	114237713.0	Missense_Mutation	p.Glu909Lys	ENST00000356083	missense_variant;splice_region_variant	E/K	Gag/Aag	MODERATE	SNV
COL27A1	chr9	114309313.0	Silent	p.=	ENST00000356083	synonymous_variant	S	tcC/tcT	LOW	SNV
COL27A1	chr9	114168608.0	Silent	p.=	ENST00000356083	synonymous_variant	A	gcG/gcT	LOW	SNV
COL27A1	chr9	114288726.0	Missense_Mutation	p.Arg1357Cys	ENST00000356083	missense_variant	R/C	Cgc/Tgc	MODERATE	SNV
COL27A1	chr9	114209702.0	Missense_Mutation	p.Gly766Ser	ENST00000356083	missense_variant	G/S	Ggc/Agc	MODERATE	SNV
COL27A1	chr9	114270754.0	Missense_Mutation	p.Ser1194Arg	ENST00000356083	missense_variant	S/R	agT/agA	MODERATE	SNV
COL27A1	chr9	114242185.0	Splice_Site		ENST00000356083	splice_acceptor_variant			HIGH	SNV
COL27A1	chr9	114245891.0	Missense_Mutation	p.Pro987Leu	ENST00000356083	missense_variant	P/L	cCg/cTg	MODERATE	SNV
COL27A1	chr9	114290101.0	Frame_Shift_Del	p.Val1419SerfsTer148	ENST00000356083	frameshift_variant	R/X	aGg/ag	HIGH	deletion
COL27A1	chr9	114290098.0	Missense_Mutation	p.Arg1416Gln	ENST00000356083	missense_variant	R/Q	cGg/cAg	MODERATE	SNV
COL27A1	chr9	114290313.0	Silent	p.=	ENST00000356083	synonymous_variant	D	gaC/gaT	LOW	SNV
COL27A1	chr9	114292137.0	Missense_Mutation	p.Pro1504His	ENST00000356083	missense_variant	P/H	cCt/cAt	MODERATE	SNV
COL27A1	chr9	114168979.0	Missense_Mutation	p.Arg475His	ENST00000356083	missense_variant	R/H	cGc/cAc	MODERATE	SNV
COL27A1	chr9	114168906.0	Frame_Shift_Del	p.Lys452AsnfsTer6	ENST00000356083	frameshift_variant	K/X	Aaa/aa	HIGH	deletion
COL27A1	chr9	114222243.0	Frame_Shift_Del	p.Pro816LeufsTer10	ENST00000356083	frameshift_variant	G/X	ggC/gg	HIGH	deletion
COL27A1	chr9	114264955.0	Missense_Mutation	p.Arg1094Gln	ENST00000356083	missense_variant	R/Q	cGg/cAg	MODERATE	SNV
COL27A1	chr9	114168601.0	Frame_Shift_Ins	p.Ala351CysfsTer101	ENST00000356083	frameshift_variant	R/RX	cgc/cgCc	HIGH	insertion
COL27A1	chr9	114309356.0	Missense_Mutation	p.Val1772Met	ENST00000356083	missense_variant	V/M	Gtg/Atg	MODERATE	SNV
COL27A1	chr9	114282496.0	Missense_Mutation	p.Val1271Ile	ENST00000356083	missense_variant	V/I	Gtc/Atc	MODERATE	SNV
COL27A1	chr9	114168014.0	Silent	p.=	ENST00000356083	synonymous_variant	D	gaC/gaT	LOW	SNV
COL27A1	chr9	114235651.0	Missense_Mutation	p.Lys873Arg	ENST00000356083	missense_variant;splice_region_variant	K/R	aAg/aGg	MODERATE	SNV
COL27A1	chr9	114310593.0	Silent	p.=	ENST00000356083	synonymous_variant	T	acC/acA	LOW	SNV
COL27A1	chr9	114231087.0	Missense_Mutation	p.Leu825Phe	ENST00000356083	missense_variant	L/F	ttA/ttC	MODERATE	SNV
COL27A1	chr9	114240240.0	Frame_Shift_Del	p.Pro918LeufsTer9	ENST00000356083	frameshift_variant	G/X	ggC/gg	HIGH	deletion
COL27A1	chr9	114167839.0	Missense_Mutation	p.Gly95Asp	ENST00000356083	missense_variant	G/D	gGc/gAc	MODERATE	SNV
COL27A1	chr9	114168601.0	Missense_Mutation	p.Arg349His	ENST00000356083	missense_variant	R/H	cGc/cAc	MODERATE	SNV
COL27A1	chr9	114231839.0	Frame_Shift_Del	p.Glu848SerfsTer4	ENST00000356083	frameshift_variant	V/X	gtG/gt	HIGH	deletion
COL27A1	chr9	114237008.0	Missense_Mutation	p.Gly883Ser	ENST00000356083	missense_variant	G/S	Ggt/Agt	MODERATE	SNV
COL27A1	chr9	114307715.0	Silent	p.=	ENST00000356083	synonymous_variant	I	atC/atT	LOW	SNV
COL27A1	chr9	114168365.0	Missense_Mutation	p.Glu270Asp	ENST00000356083	missense_variant	E/D	gaG/gaT	MODERATE	SNV
COL27A1	chr9	114217894.0	Intron		ENST00000356083	intron_variant			MODIFIER	SNV
COL27A1	chr9	114252592.0	Splice_Site		ENST00000356083	splice_acceptor_variant			HIGH	SNV
COL27A1	chr9	114169362.0	Missense_Mutation	p.Arg603Trp	ENST00000356083	missense_variant	R/W	Cgg/Tgg	MODERATE	SNV
COL27A1	chr9	114167901.0	Missense_Mutation	p.Ala116Thr	ENST00000356083	missense_variant	A/T	Gct/Act	MODERATE	SNV
COL27A1	chr9	114283745.0	Missense_Mutation	p.Gly1306Arg	ENST00000356083	missense_variant	G/R	Gga/Aga	MODERATE	SNV
COL27A1	chr9	114168716.0	Silent	p.=	ENST00000356083	synonymous_variant	P	ccT/ccC	LOW	SNV
COL27A1	chr9	114194456.0	Missense_Mutation	p.Lys690Thr	ENST00000356083	missense_variant;splice_region_variant	K/T	aAg/aCg	MODERATE	SNV
COL27A1	chr9	114290825.0	Missense_Mutation	p.Asp1462Asn	ENST00000356083	missense_variant	D/N	Gat/Aat	MODERATE	SNV
COL27A1	chr9	114167827.0	Frame_Shift_Del	p.Ala92GlufsTer108	ENST00000356083	frameshift_variant	PAALGTELALV/X	cCTGCCGCCTTGGGCACAGAGCTGGCACTGGTG/c	HIGH	deletion
COL27A1	chr9	114196014.0	Splice_Site		ENST00000356083	splice_donor_variant			HIGH	SNV
COL27A1	chr9	114167791.0	Missense_Mutation	p.Arg79Gln	ENST00000356083	missense_variant	R/Q	cGg/cAg	MODERATE	SNV
COL27A1	chr9	114195975.0	Missense_Mutation	p.Pro696His	ENST00000356083	missense_variant	P/H	cCt/cAt	MODERATE	SNV
COL27A1	chr9	114245869.0	Missense_Mutation	p.Glu980Lys	ENST00000356083	missense_variant	E/K	Gaa/Aaa	MODERATE	SNV
COL27A1	chr9	114264382.0	Frame_Shift_Del	p.Glu1076SerfsTer7	ENST00000356083	frameshift_variant	G/X	Ggg/gg	HIGH	deletion
COL7A1	chr3	48575677.0	Silent	p.=	ENST00000328333	synonymous_variant	R	cgG/cgA	LOW	SNV
COL7A1	chr3	48592126.0	Missense_Mutation	p.Ala406Thr	ENST00000328333	missense_variant	A/T	Gcc/Acc	MODERATE	SNV
COL7A1	chr3	48581123.0	Missense_Mutation	p.Pro1645Leu	ENST00000328333	missense_variant;splice_region_variant	P/L	cCg/cTg	MODERATE	SNV
COL7A1	chr3	48585074.0	Missense_Mutation	p.Ala1313Thr	ENST00000328333	missense_variant	A/T	Gcc/Acc	MODERATE	SNV
COL7A1	chr3	48587032.0	Silent	p.=	ENST00000328333	synonymous_variant	T	acG/acA	LOW	SNV
COL7A1	chr3	48590470.0	Missense_Mutation	p.Ser632Asn	ENST00000328333	missense_variant	S/N	aGc/aAc	MODERATE	SNV
COL7A1	chr3	48594401.0	Missense_Mutation	p.Arg78His	ENST00000328333	missense_variant	R/H	cGc/cAc	MODERATE	SNV
COL7A1	chr3	48569762.0	Splice_Site		ENST00000328333	splice_acceptor_variant			HIGH	SNV
COL7A1	chr3	48580604.0	Missense_Mutation	p.Asp1677Tyr	ENST00000328333	missense_variant	D/Y	Gat/Tat	MODERATE	SNV
COL7A1	chr3	48589636.0	Silent	p.=	ENST00000328333	synonymous_variant	G	ggC/ggT	LOW	SNV
COL7A1	chr3	48586195.0	Missense_Mutation	p.Arg1201His	ENST00000328333	missense_variant	R/H	cGt/cAt	MODERATE	SNV
COL7A1	chr3	48572694.0	Missense_Mutation	p.Gly2293Ser	ENST00000328333	missense_variant	G/S	Ggc/Agc	MODERATE	SNV
COL7A1	chr3	48585585.0	Missense_Mutation	p.Pro1289Leu	ENST00000328333	missense_variant	P/L	cCt/cTt	MODERATE	SNV
COL7A1	chr3	48590773.0	Silent	p.=	ENST00000328333	synonymous_variant	F	ttC/ttT	LOW	SNV
COL7A1	chr3	48575359.0	Missense_Mutation	p.Ala2054Thr	ENST00000328333	missense_variant	A/T	Gca/Aca	MODERATE	SNV
COL7A1	chr3	48570145.0	Nonsense_Mutation	p.Arg2492Ter	ENST00000328333	stop_gained	R/*	Cga/Tga	HIGH	SNV
COL7A1	chr3	48564827.0	Missense_Mutation	p.Cys2925Tyr	ENST00000328333	missense_variant	C/Y	tGc/tAc	MODERATE	SNV
COL7A1	chr3	48582345.0	Missense_Mutation	p.Arg1538His	ENST00000328333	missense_variant	R/H	cGc/cAc	MODERATE	SNV
COL7A1	chr3	48591978.0	Missense_Mutation	p.Leu426Pro	ENST00000328333	missense_variant	L/P	cTg/cCg	MODERATE	SNV
COL7A1	chr3	48591950.0	Frame_Shift_Del	p.Trp435Ter	ENST00000328333	frameshift_variant	W/X	tgG/tg	HIGH	deletion
COL7A1	chr3	48589665.0	Missense_Mutation	p.Val702Ile	ENST00000328333	missense_variant	V/I	Gtc/Atc	MODERATE	SNV
COL7A1	chr3	48593154.0	Silent	p.=	ENST00000328333	synonymous_variant	L	ctC/ctT	LOW	SNV
COL7A1	chr3	48573345.0	Frame_Shift_Del	p.Glu2208SerfsTer12	ENST00000328333	frameshift_variant	E/X	Gag/ag	HIGH	deletion
COL7A1	chr3	48566921.0	Missense_Mutation	p.Leu2738Val	ENST00000328333	missense_variant	L/V	Ctt/Gtt	MODERATE	SNV
COL7A1	chr3	48590237.0	Missense_Mutation	p.Ala676Thr	ENST00000328333	missense_variant	A/T	Gct/Act	MODERATE	SNV
COL7A1	chr3	48578499.0	Missense_Mutation	p.Arg1814His	ENST00000328333	missense_variant	R/H	cGt/cAt	MODERATE	SNV
COL7A1	chr3	48564331.0	3'UTR		ENST00000328333	3_prime_UTR_variant			MODIFIER	deletion
COL7A1	chr3	48592211.0	Missense_Mutation	p.Gln377His	ENST00000328333	missense_variant	Q/H	caG/caT	MODERATE	SNV
COL7A1	chr3	48570166.0	Missense_Mutation	p.Arg2485Cys	ENST00000328333	missense_variant	R/C	Cgc/Tgc	MODERATE	SNV
COL7A1	chr3	48564297.0	3'UTR		ENST00000328333	3_prime_UTR_variant			MODIFIER	SNV
COL7A1	chr3	48566910.0	Missense_Mutation	p.Gln2741His	ENST00000328333	missense_variant	Q/H	caG/caT	MODERATE	SNV
COL7A1	chr3	48579490.0	Frame_Shift_Del	p.Pro1754GlnfsTer87	ENST00000328333	frameshift_variant	P/X	cCa/ca	HIGH	deletion
COL7A1	chr3	48575438.0	Frame_Shift_Del	p.Pro2029LeufsTer177	ENST00000328333	frameshift_variant	P/X	ccC/cc	HIGH	deletion
COL7A1	chr3	48583737.0	Frame_Shift_Del	p.Pro1441LeufsTer269	ENST00000328333	frameshift_variant	P/X	cCt/ct	HIGH	deletion
COL7A1	chr3	48584368.0	Frame_Shift_Del	p.Pro1376LeufsTer23	ENST00000328333	frameshift_variant	P/X	cCt/ct	HIGH	deletion
COL7A1	chr3	48586667.0	Missense_Mutation	p.His1100Arg	ENST00000328333	missense_variant	H/R	cAt/cGt	MODERATE	SNV
COL7A1	chr3	48591532.0	Missense_Mutation	p.Arg523Gln	ENST00000328333	missense_variant	R/Q	cGg/cAg	MODERATE	SNV
COL7A1	chr3	48568791.0	Missense_Mutation	p.Gly2584Val	ENST00000328333	missense_variant	G/V	gGa/gTa	MODERATE	SNV
COL7A1	chr3	48567885.0	Missense_Mutation	p.Arg2628Trp	ENST00000328333	missense_variant	R/W	Cgg/Tgg	MODERATE	SNV
COL7A1	chr3	48564819.0	Missense_Mutation	p.Arg2928Cys	ENST00000328333	missense_variant	R/C	Cgc/Tgc	MODERATE	SNV
COL7A1	chr3	48566991.0	Frame_Shift_Del	p.Ser2715ValfsTer71	ENST00000328333	frameshift_variant	P/X	ccC/cc	HIGH	deletion
COL7A1	chr3	48580035.0	Missense_Mutation	p.Arg1707Gln	ENST00000328333	missense_variant	R/Q	cGg/cAg	MODERATE	SNV
COL7A1	chr3	48588376.0	Silent	p.=	ENST00000328333	synonymous_variant	T	acG/acA	LOW	SNV
COL7A1	chr3	48575636.0	Frame_Shift_Del	p.Pro1990GlnfsTer15	ENST00000328333	frameshift_variant	P/X	cCa/ca	HIGH	deletion
COL7A1	chr3	48593618.0	Frame_Shift_Ins	p.Asn116GlnfsTer13	ENST00000328333	frameshift_variant	G/GX	ggc/ggGc	HIGH	insertion
COL7A1	chr3	48573197.0	Missense_Mutation	p.Pro2231Thr	ENST00000328333	missense_variant	P/T	Ccc/Acc	MODERATE	SNV
COL7A1	chr3	48588785.0	Missense_Mutation	p.Gly815Asp	ENST00000328333	missense_variant	G/D	gGc/gAc	MODERATE	SNV
COL7A1	chr3	48590721.0	Nonsense_Mutation	p.Arg578Ter	ENST00000328333	stop_gained	R/*	Cga/Tga	HIGH	SNV
COL7A1	chr3	48576762.0	Missense_Mutation	p.Gly1872Ser	ENST00000328333	missense_variant	G/S	Ggc/Agc	MODERATE	SNV
COL7A1	chr3	48565193.0	Missense_Mutation	p.Pro2846Ser	ENST00000328333	missense_variant	P/S	Ccc/Tcc	MODERATE	SNV
COL7A1	chr3	48565433.0	Missense_Mutation	p.Arg2835His	ENST00000328333	missense_variant	R/H	cGc/cAc	MODERATE	SNV
COL7A1	chr3	48591752.0	Silent	p.=	ENST00000328333	synonymous_variant	P	ccG/ccA	LOW	SNV
COL7A1	chr3	48572678.0	Frame_Shift_Del	p.Pro2298LeufsTer90	ENST00000328333	frameshift_variant	P/X	cCt/ct	HIGH	deletion
COL7A1	chr3	48573864.0	Frame_Shift_Ins	p.Gly2177TrpfsTer113	ENST00000328333	frameshift_variant	P/PX	cct/ccCt	HIGH	insertion
COL7A1	chr3	48586239.0	Silent	p.=	ENST00000328333	synonymous_variant	N	aaT/aaC	LOW	SNV
COL7A1	chr3	48567595.0	Missense_Mutation	p.Lys2675Asn	ENST00000328333	missense_variant	K/N	aaG/aaT	MODERATE	SNV
COL7A1	chr3	48565649.0	Silent	p.=	ENST00000328333	synonymous_variant	I	atC/atT	LOW	SNV
COL7A1	chr3	48575236.0	Missense_Mutation	p.Arg2063Trp	ENST00000328333	missense_variant	R/W	Cgg/Tgg	MODERATE	SNV
COL7A1	chr3	48575445.0	Missense_Mutation	p.Gly2025Ala	ENST00000328333	missense_variant	G/A	gGc/gCc	MODERATE	SNV
COL7A1	chr3	48581301.0	Missense_Mutation	p.Arg1620Trp	ENST00000328333	missense_variant	R/W	Cgg/Tgg	MODERATE	SNV
COL7A1	chr3	48593640.0	Missense_Mutation	p.Arg108His	ENST00000328333	missense_variant	R/H	cGt/cAt	MODERATE	SNV
COL7A1	chr3	48587243.0	Missense_Mutation	p.Thr1029Met	ENST00000328333	missense_variant	T/M	aCg/aTg	MODERATE	SNV
COL7A1	chr3	48592176.0	Missense_Mutation	p.Thr389Met	ENST00000328333	missense_variant	T/M	aCg/aTg	MODERATE	SNV
COL7A1	chr3	48590495.0	Missense_Mutation	p.Ala624Thr	ENST00000328333	missense_variant	A/T	Gcc/Acc	MODERATE	SNV
COL7A1	chr3	48588677.0	Missense_Mutation	p.Arg851His	ENST00000328333	missense_variant	R/H	cGc/cAc	MODERATE	SNV
COL7A1	chr3	48593650.0	Missense_Mutation	p.Arg105Cys	ENST00000328333	missense_variant	R/C	Cgc/Tgc	MODERATE	SNV
COL7A1	chr3	48568499.0	Splice_Region	p.=	ENST00000328333	splice_region_variant;synonymous_variant	P	ccG/ccA	LOW	SNV
BRCA2	chr13	32339422.0	Frame_Shift_Del	p.Lys1691AsnfsTer15	ENST00000380152	frameshift_variant	A/X	gcA/gc	HIGH	deletion
BRCA2	chr13	32332913.0	Missense_Mutation	p.Asp479Tyr	ENST00000380152	missense_variant	D/Y	Gac/Tac	MODERATE	SNV
BRCA2	chr13	32337930.0	Missense_Mutation	p.Phe1192Cys	ENST00000380152	missense_variant	F/C	tTt/tGt	MODERATE	SNV
BRCA2	chr13	32379787.0	Nonsense_Mutation	p.Tyr2997Ter	ENST00000380152	stop_gained	Y/*	taT/taG	HIGH	SNV
BRCA2	chr13	32398469.0	Missense_Mutation	p.Ser3319Tyr	ENST00000380152	missense_variant	S/Y	tCt/tAt	MODERATE	SNV
BRCA2	chr13	32363251.0	Frame_Shift_Del	p.Thr2685HisfsTer9	ENST00000380152	frameshift_variant	A/X	gcA/gc	HIGH	deletion
BRCA2	chr13	32340236.0	Missense_Mutation	p.Ser1961Gly	ENST00000380152	missense_variant	S/G	Agt/Ggt	MODERATE	SNV
BRCA2	chr13	32340618.0	Missense_Mutation	p.Thr2088Ser	ENST00000380152	missense_variant	T/S	aCt/aGt	MODERATE	SNV
BRCA2	chr13	32330932.0	Missense_Mutation	p.Tyr232Cys	ENST00000380152	missense_variant	Y/C	tAt/tGt	MODERATE	SNV
BRCA2	chr13	32339045.0	Missense_Mutation	p.Ala1564Thr	ENST00000380152	missense_variant	A/T	Gca/Aca	MODERATE	SNV
BRCA2	chr13	32338832.0	Nonsense_Mutation	p.Glu1493Ter	ENST00000380152	stop_gained	E/*	Gaa/Taa	HIGH	SNV
BRCA2	chr13	32356530.0	Frame_Shift_Ins	p.Thr2515AsnfsTer24	ENST00000380152	frameshift_variant	A/AX	gca/gcAa	HIGH	insertion
BRCA2	chr13	32340646.0	Silent	p.=	ENST00000380152	synonymous_variant	T	acG/acA	LOW	SNV
BRCA2	chr13	32339700.0	Frame_Shift_Del	p.Asn1784ThrfsTer7	ENST00000380152	frameshift_variant	Q/X	cAa/ca	HIGH	deletion
BRCA2	chr13	32338391.0	Missense_Mutation	p.Thr1346Ala	ENST00000380152	missense_variant	T/A	Act/Gct	MODERATE	SNV
BRCA2	chr13	32333006.0	Nonsense_Mutation	p.Glu510Ter	ENST00000380152	stop_gained	E/*	Gaa/Taa	HIGH	SNV
BRCA2	chr13	32332429.0	Frame_Shift_Del	p.Asn319IlefsTer5	ENST00000380152	frameshift_variant	T/X	acA/ac	HIGH	deletion
BRCA2	chr13	32355160.0	Missense_Mutation	p.Asn2436Ser	ENST00000380152	missense_variant	N/S	aAc/aGc	MODERATE	SNV
BRCA2	chr13	32336987.0	Missense_Mutation	p.Asp878Asn	ENST00000380152	missense_variant	D/N	Gac/Aac	MODERATE	SNV
BRCA2	chr13	32337311.0	In_Frame_Del	p.Asn987del	ENST00000380152	inframe_deletion	N/-	AAT/-	MODERATE	deletion
BRCA2	chr13	32370993.0	Missense_Mutation	p.Arg2842His	ENST00000380152	missense_variant	R/H	cGc/cAc	MODERATE	SNV
BRCA2	chr13	32316501.0	Frame_Shift_Del	p.Phe15LeufsTer10	ENST00000380152	frameshift_variant	I/X	aTt/at	HIGH	deletion
BRCA2	chr13	32336311.0	Silent	p.=	ENST00000380152	synonymous_variant	S	tcT/tcC	LOW	SNV
BRCA2	chr13	32398216.0	Missense_Mutation	p.Ala3235Thr	ENST00000380152	missense_variant	A/T	Gcc/Acc	MODERATE	SNV
BRCA2	chr13	32336850.0	Missense_Mutation	p.Glu832Gly	ENST00000380152	missense_variant	E/G	gAg/gGg	MODERATE	SNV
BRCA2	chr13	32326597.0	Missense_Mutation	p.Ser205Arg	ENST00000380152	missense_variant	S/R	agT/agG	MODERATE	SNV
BRCA2	chr13	32338658.0	Missense_Mutation	p.Asn1435His	ENST00000380152	missense_variant	N/H	Aat/Cat	MODERATE	SNV
BRCA2	chr13	32325174.0	Missense_Mutation	p.Leu139Val	ENST00000380152	missense_variant	L/V	Ctt/Gtt	MODERATE	SNV
BRCA2	chr13	32398756.0	Frame_Shift_Del	p.Lys3416AsnfsTer11	ENST00000380152	frameshift_variant	K/X	Aaa/aa	HIGH	deletion
BRCA2	chr13	32333011.0	Silent	p.=	ENST00000380152	synonymous_variant	S	tcA/tcG	LOW	SNV
BRCA2	chr13	32319298.0	Nonsense_Mutation	p.Glu97Ter	ENST00000380152	stop_gained	E/*	Gaa/Taa	HIGH	SNV
BRCA2	chr13	32332319.0	Missense_Mutation	p.Asp281Tyr	ENST00000380152	missense_variant	D/Y	Gac/Tac	MODERATE	SNV
BRCA2	chr13	32332812.0	Missense_Mutation	p.Ser445Tyr	ENST00000380152	missense_variant	S/Y	tCt/tAt	MODERATE	SNV
BRCA2	chr13	32333316.0	Missense_Mutation	p.Leu613Arg	ENST00000380152	missense_variant	L/R	cTa/cGa	MODERATE	SNV
BRCA2	chr13	32337056.0	Missense_Mutation	p.Leu901Ile	ENST00000380152	missense_variant	L/I	Ctt/Att	MODERATE	SNV
BRCA2	chr13	32338409.0	Missense_Mutation	p.Asp1352Tyr	ENST00000380152	missense_variant	D/Y	Gat/Tat	MODERATE	SNV
BRCA2	chr13	32339627.0	Missense_Mutation	p.Asn1758His	ENST00000380152	missense_variant	N/H	Aat/Cat	MODERATE	SNV
BRCA2	chr13	32355260.0	Silent	p.=	ENST00000380152	synonymous_variant	T	acT/acG	LOW	SNV
BRCA2	chr13	32362621.0	Missense_Mutation	p.Glu2635Gly	ENST00000380152	missense_variant	E/G	gAa/gGa	MODERATE	SNV
BRCA2	chr13	32339277.0	Frame_Shift_Del	p.Asn1642MetfsTer2	ENST00000380152	frameshift_variant	E/X	gAa/ga	HIGH	deletion
BRCA2	chr13	32332271.0	Splice_Site		ENST00000380152	splice_acceptor_variant			HIGH	SNV
BRCA2	chr13	32336277.0	Missense_Mutation	p.Ser641Tyr	ENST00000380152	missense_variant	S/Y	tCt/tAt	MODERATE	SNV
BRCA2	chr13	32356551.0	Missense_Mutation	p.Arg2520Gln	ENST00000380152	missense_variant	R/Q	cGa/cAa	MODERATE	SNV
BRCA2	chr13	32379420.0	Missense_Mutation	p.Glu2953Ala	ENST00000380152	missense_variant	E/A	gAa/gCa	MODERATE	SNV
BRCA2	chr13	32338982.0	Frame_Shift_Del	p.Asn1544ThrfsTer24	ENST00000380152	frameshift_variant	K/X	Aaa/aa	HIGH	deletion
BRCA2	chr13	32363184.0	Missense_Mutation	p.Asp2661Val	ENST00000380152	missense_variant	D/V	gAt/gTt	MODERATE	SNV
BRCA2	chr13	32398401.0	Missense_Mutation	p.Lys3296Asn	ENST00000380152	missense_variant	K/N	aaG/aaT	MODERATE	SNV
BRCA2	chr13	32357919.0	Nonsense_Mutation	p.Glu2599Ter	ENST00000380152	stop_gained	E/*	Gaa/Taa	HIGH	SNV
BRCA2	chr13	32337305.0	Frame_Shift_Ins	p.Asn986LysfsTer2	ENST00000380152	frameshift_variant	E/EX	gaa/gAaa	HIGH	insertion
BRCA2	chr13	32339582.0	Missense_Mutation	p.Ser1743Arg	ENST00000380152	missense_variant	S/R	Agt/Cgt	MODERATE	SNV
BRCA2	chr13	32332474.0	Missense_Mutation	p.Ile332Met	ENST00000380152	missense_variant	I/M	atT/atG	MODERATE	SNV
BRCA2	chr13	32340828.0	Missense_Mutation	p.Phe2158Cys	ENST00000380152	missense_variant	F/C	tTt/tGt	MODERATE	SNV
BRCA2	chr13	32380142.0	Missense_Mutation	p.Thr3085Ala	ENST00000380152	missense_variant	T/A	Aca/Gca	MODERATE	SNV
BRCA2	chr13	32398569.0	Silent	p.=	ENST00000380152	synonymous_variant	L	ctT/ctG	LOW	SNV
BRCA2	chr13	32398452.0	Frame_Shift_Ins	p.Glu3316ArgfsTer11	ENST00000380152	frameshift_variant	-/X	-/A	HIGH	insertion
BRCA2	chr13	32326147.0	Missense_Mutation	p.Ser158Pro	ENST00000380152	missense_variant	S/P	Tca/Cca	MODERATE	SNV
BRCA2	chr13	32333199.0	Frame_Shift_Ins	p.Leu574PhefsTer21	ENST00000380152	frameshift_variant	L/FLKFGSX	ttg/ttTTTAAAGTTTGGATCAg	HIGH	insertion
BRCA2	chr13	32336517.0	In_Frame_Ins	p.Pro721_Lys722insGluArgLeu	ENST00000380152	inframe_insertion	P/PERL	cca/ccTGAGAGATTa	MODERATE	insertion
BRCA2	chr13	32379767.0	Missense_Mutation	p.Arg2991Cys	ENST00000380152	missense_variant	R/C	Cgt/Tgt	MODERATE	SNV
BRCA2	chr13	32338534.0	Silent	p.=	ENST00000380152	synonymous_variant	A	gcG/gcA	LOW	SNV
BRCA2	chr13	32336651.0	Missense_Mutation	p.Ala766Thr	ENST00000380152	missense_variant	A/T	Gcc/Acc	MODERATE	SNV
BRCA2	chr13	32397002.0	Silent	p.=	ENST00000380152	synonymous_variant	P	ccG/ccA	LOW	SNV
KIF26B	chr1	245702728.0	3'UTR		ENST00000407071	3_prime_UTR_variant			MODIFIER	SNV
KIF26B	chr1	245685820.0	Missense_Mutation	p.Pro946His	ENST00000407071	missense_variant	P/H	cCt/cAt	MODERATE	SNV
KIF26B	chr1	245646133.0	Missense_Mutation	p.Arg704His	ENST00000407071	missense_variant	R/H	cGc/cAc	MODERATE	SNV
KIF26B	chr1	245602664.0	Nonsense_Mutation	p.Gln480Ter	ENST00000407071	stop_gained	Q/*	Cag/Tag	HIGH	SNV
KIF26B	chr1	245686629.0	Missense_Mutation	p.Asp1216Asn	ENST00000407071	missense_variant	D/N	Gac/Aac	MODERATE	SNV
KIF26B	chr1	245156403.0	Missense_Mutation	p.Ala62Val	ENST00000407071	missense_variant	A/V	gCg/gTg	MODERATE	SNV
KIF26B	chr1	245684316.0	Missense_Mutation	p.Ala781Val	ENST00000407071	missense_variant	A/V	gCg/gTg	MODERATE	SNV
KIF26B	chr1	245602592.0	Missense_Mutation	p.Arg456Cys	ENST00000407071	missense_variant	R/C	Cgc/Tgc	MODERATE	SNV
KIF26B	chr1	245684246.0	Missense_Mutation	p.Ala758Thr	ENST00000407071	missense_variant	A/T	Gcc/Acc	MODERATE	SNV
KIF26B	chr1	245687991.0	Missense_Mutation	p.Gly1670Ser	ENST00000407071	missense_variant	G/S	Ggc/Agc	MODERATE	SNV
KIF26B	chr1	245688756.0	Missense_Mutation	p.Val1925Met	ENST00000407071	missense_variant	V/M	Gtg/Atg	MODERATE	SNV
KIF26B	chr1	245602681.0	Missense_Mutation	p.Asp485Glu	ENST00000407071	missense_variant	D/E	gaT/gaG	MODERATE	SNV
KIF26B	chr1	245686801.0	Missense_Mutation	p.Ser1273Ile	ENST00000407071	missense_variant	S/I	aGc/aTc	MODERATE	SNV
KIF26B	chr1	245687250.0	Missense_Mutation	p.Ser1423Thr	ENST00000407071	missense_variant	S/T	Tcc/Acc	MODERATE	SNV
KIF26B	chr1	245698946.0	Silent	p.=	ENST00000407071	synonymous_variant	A	gcC/gcT	LOW	SNV
KIF26B	chr1	245686280.0	Silent	p.=	ENST00000407071	synonymous_variant	P	ccG/ccA	LOW	SNV
KIF26B	chr1	245684301.0	Missense_Mutation	p.Ala776Val	ENST00000407071	missense_variant	A/V	gCg/gTg	MODERATE	SNV
KIF26B	chr1	245698189.0	Missense_Mutation	p.Arg1970Cys	ENST00000407071	missense_variant	R/C	Cgc/Tgc	MODERATE	SNV
KIF26B	chr1	245686324.0	Missense_Mutation	p.Ala1114Val	ENST00000407071	missense_variant	A/V	gCg/gTg	MODERATE	SNV
KIF26B	chr1	245687453.0	Silent	p.=	ENST00000407071	synonymous_variant	L	ctC/ctT	LOW	SNV
KIF26B	chr1	245688741.0	Missense_Mutation	p.Glu1920Lys	ENST00000407071	missense_variant	E/K	Gag/Aag	MODERATE	SNV
KIF26B	chr1	245684277.0	Missense_Mutation	p.Met768Thr	ENST00000407071	missense_variant	M/T	aTg/aCg	MODERATE	SNV
KIF26B	chr1	245686595.0	Silent	p.=	ENST00000407071	synonymous_variant	S	agC/agT	LOW	SNV
KIF26B	chr1	245687187.0	Missense_Mutation	p.Arg1402Trp	ENST00000407071	missense_variant	R/W	Cgg/Tgg	MODERATE	SNV
KIF26B	chr1	245366909.0	Missense_Mutation	p.Asp181Asn	ENST00000407071	missense_variant	D/N	Gac/Aac	MODERATE	SNV
KIF26B	chr1	245511111.0	Intron		ENST00000407071	intron_variant			MODIFIER	SNV
KIF26B	chr1	245685791.0	Silent	p.=	ENST00000407071	synonymous_variant	I	atC/atT	LOW	SNV
KIF26B	chr1	245698923.0	Missense_Mutation	p.Glu2022Lys	ENST00000407071	missense_variant	E/K	Gaa/Aaa	MODERATE	SNV
KIF26B	chr1	245685893.0	Silent	p.=	ENST00000407071	synonymous_variant	G	ggG/ggA	LOW	SNV
KIF26B	chr1	245367129.0	Missense_Mutation	p.Thr254Ile	ENST00000407071	missense_variant	T/I	aCc/aTc	MODERATE	SNV
KIF26B	chr1	245611836.0	Missense_Mutation	p.Ala653Val	ENST00000407071	missense_variant	A/V	gCt/gTt	MODERATE	SNV
KIF26B	chr1	245686462.0	Missense_Mutation	p.Thr1160Ile	ENST00000407071	missense_variant	T/I	aCt/aTt	MODERATE	SNV
KIF26B	chr1	245367116.0	Missense_Mutation	p.Ala250Thr	ENST00000407071	missense_variant	A/T	Gcc/Acc	MODERATE	SNV
KIF26B	chr1	245688480.0	Frame_Shift_Del	p.Ala1835ProfsTer41	ENST00000407071	frameshift_variant	G/X	Ggg/gg	HIGH	deletion
KIF26B	chr1	245688072.0	Missense_Mutation	p.Ala1697Thr	ENST00000407071	missense_variant	A/T	Gcg/Acg	MODERATE	SNV
KIF26B	chr1	245366996.0	Missense_Mutation	p.Gly210Ser	ENST00000407071	missense_variant	G/S	Ggc/Agc	MODERATE	SNV
KIF26B	chr1	245685539.0	Silent	p.=	ENST00000407071	synonymous_variant	P	ccC/ccT	LOW	SNV
KIF26B	chr1	245685800.0	Silent	p.=	ENST00000407071	synonymous_variant	S	agC/agT	LOW	SNV
KIF26B	chr1	245540827.0	Silent	p.=	ENST00000407071	synonymous_variant	S	tcC/tcT	LOW	SNV
KIF26B	chr1	245540937.0	Missense_Mutation	p.Pro446Leu	ENST00000407071	missense_variant	P/L	cCg/cTg	MODERATE	SNV
KIF26B	chr1	245686083.0	Missense_Mutation	p.Ala1034Thr	ENST00000407071	missense_variant	A/T	Gcc/Acc	MODERATE	SNV
KIF26B	chr1	245688771.0	Missense_Mutation	p.Arg1930Trp	ENST00000407071	missense_variant	R/W	Cgg/Tgg	MODERATE	SNV
KIF26B	chr1	245685790.0	Missense_Mutation	p.Ile936Thr	ENST00000407071	missense_variant	I/T	aTc/aCc	MODERATE	SNV
KIF26B	chr1	245685962.0	Silent	p.=	ENST00000407071	synonymous_variant	G	ggC/ggT	LOW	SNV
KIF26B	chr1	245687148.0	Missense_Mutation	p.Thr1389Ala	ENST00000407071	missense_variant	T/A	Acc/Gcc	MODERATE	SNV
KIF26B	chr1	245698965.0	Missense_Mutation	p.Glu2036Lys	ENST00000407071	missense_variant	E/K	Gag/Aag	MODERATE	SNV
KIF26B	chr1	245702642.0	3'UTR		ENST00000407071	3_prime_UTR_variant			MODIFIER	SNV
KIF26B	chr1	245686725.0	Missense_Mutation	p.Val1248Ile	ENST00000407071	missense_variant	V/I	Gtc/Atc	MODERATE	SNV
KIF26B	chr1	245702583.0	Missense_Mutation	p.Asp2102Asn	ENST00000407071	missense_variant	D/N	Gac/Aac	MODERATE	SNV
KIF26B	chr1	245686177.0	Frame_Shift_Del	p.Arg1067GlyfsTer65	ENST00000407071	frameshift_variant	S/X	tCc/tc	HIGH	deletion
KIF26B	chr1	245367074.0	Missense_Mutation	p.Val236Met	ENST00000407071	missense_variant	V/M	Gtg/Atg	MODERATE	SNV
KIF26B	chr1	245602753.0	Silent	p.=	ENST00000407071	synonymous_variant	F	ttC/ttT	LOW	SNV
KIF26B	chr1	245686307.0	Silent	p.=	ENST00000407071	synonymous_variant	S	agC/agT	LOW	SNV
KIF26B	chr1	245687696.0	Silent	p.=	ENST00000407071	synonymous_variant	P	ccG/ccA	LOW	SNV
KIF26B	chr1	245540810.0	Missense_Mutation	p.Arg404Trp	ENST00000407071	missense_variant	R/W	Cgg/Tgg	MODERATE	SNV
KIF26B	chr1	245609314.0	Missense_Mutation	p.Gly567Asp	ENST00000407071	missense_variant	G/D	gGc/gAc	MODERATE	SNV
KIF26B	chr1	245611888.0	Missense_Mutation	p.Asp670Glu	ENST00000407071	missense_variant	D/E	gaC/gaA	MODERATE	SNV
KIF26B	chr1	245698958.0	Silent	p.=	ENST00000407071	synonymous_variant	A	gcG/gcA	LOW	SNV
KIF26B	chr1	245646258.0	Frame_Shift_Ins	p.Gly746GlufsTer98	ENST00000407071	frameshift_variant	G/EMX	ggc/gAGATgc	HIGH	insertion
KIF26B	chr1	245686015.0	Missense_Mutation	p.Ala1011Val	ENST00000407071	missense_variant	A/V	gCg/gTg	MODERATE	SNV
KIF26B	chr1	245156406.0	Missense_Mutation	p.Leu63Arg	ENST00000407071	missense_variant	L/R	cTc/cGc	MODERATE	SNV
CELSR1	chr22	46410526.0	Frame_Shift_Del	p.Gly1602ValfsTer104	ENST00000262738	frameshift_variant	G/X	gGt/gt	HIGH	deletion
CELSR1	chr22	46535283.0	Missense_Mutation	p.Phe630Leu	ENST00000262738	missense_variant	F/L	Ttc/Ctc	MODERATE	SNV
CELSR1	chr22	46536089.0	Missense_Mutation	p.Arg361His	ENST00000262738	missense_variant	R/H	cGc/cAc	MODERATE	SNV
CELSR1	chr22	46377183.0	Missense_Mutation	p.Val2488Ile	ENST00000262738	missense_variant	V/I	Gtc/Atc	MODERATE	SNV
CELSR1	chr22	46439326.0	Silent	p.=	ENST00000262738	synonymous_variant	I	atC/atT	LOW	SNV
CELSR1	chr22	46397819.0	Silent	p.=	ENST00000262738	synonymous_variant	N	aaC/aaT	LOW	SNV
CELSR1	chr22	46366431.0	Missense_Mutation	p.Arg2752His	ENST00000262738	missense_variant	R/H	cGc/cAc	MODERATE	SNV
CELSR1	chr22	46535025.0	Missense_Mutation	p.Ala716Thr	ENST00000262738	missense_variant	A/T	Gcc/Acc	MODERATE	SNV
CELSR1	chr22	46533774.0	Missense_Mutation	p.Asp1133Asn	ENST00000262738	missense_variant	D/N	Gac/Aac	MODERATE	SNV
CELSR1	chr22	46398623.0	Silent	p.=	ENST00000262738	synonymous_variant	I	atC/atT	LOW	SNV
CELSR1	chr22	46364115.0	Silent	p.=	ENST00000262738	synonymous_variant	G	ggC/ggT	LOW	SNV
CELSR1	chr22	46534678.0	Silent	p.=	ENST00000262738	synonymous_variant	P	ccC/ccA	LOW	SNV
CELSR1	chr22	46364634.0	Missense_Mutation	p.Thr2886Asn	ENST00000262738	missense_variant	T/N	aCc/aAc	MODERATE	SNV
CELSR1	chr22	46535330.0	Frame_Shift_Del	p.Gly614AlafsTer54	ENST00000262738	frameshift_variant	G/X	gGc/gc	HIGH	deletion
CELSR1	chr22	46439332.0	Silent	p.=	ENST00000262738	synonymous_variant	L	ctG/ctT	LOW	SNV
CELSR1	chr22	46535576.0	Missense_Mutation	p.Leu532Pro	ENST00000262738	missense_variant	L/P	cTg/cCg	MODERATE	SNV
CELSR1	chr22	46436245.0	Missense_Mutation	p.Arg1484His	ENST00000262738	missense_variant	R/H	cGc/cAc	MODERATE	SNV
CELSR1	chr22	46534447.0	Silent	p.=	ENST00000262738	synonymous_variant	S	tcG/tcA	LOW	SNV
CELSR1	chr22	46372972.0	Missense_Mutation	p.Tyr2557Cys	ENST00000262738	missense_variant	Y/C	tAc/tGc	MODERATE	SNV
CELSR1	chr22	46535864.0	Missense_Mutation	p.Pro436Leu	ENST00000262738	missense_variant	P/L	cCg/cTg	MODERATE	SNV
CELSR1	chr22	46533898.0	Silent	p.=	ENST00000262738	synonymous_variant	L	ctC/ctT	LOW	SNV
CELSR1	chr22	46397831.0	Frame_Shift_Del	p.Thr1849ArgfsTer8	ENST00000262738	frameshift_variant	G/X	ggG/gg	HIGH	deletion
CELSR1	chr22	46533969.0	Missense_Mutation	p.Arg1068Trp	ENST00000262738	missense_variant	R/W	Cgg/Tgg	MODERATE	SNV
CELSR1	chr22	46534774.0	Silent	p.=	ENST00000262738	synonymous_variant	S	agT/agC	LOW	SNV
CELSR1	chr22	46391250.0	Silent	p.=	ENST00000262738	synonymous_variant	G	ggC/ggT	LOW	SNV
CELSR1	chr22	46384603.0	Frame_Shift_Ins	p.Arg2275GlnfsTer18	ENST00000262738	frameshift_variant	-/X	-/C	HIGH	insertion
CELSR1	chr22	46535468.0	Missense_Mutation	p.Ser568Ile	ENST00000262738	missense_variant	S/I	aGc/aTc	MODERATE	SNV
CELSR1	chr22	46364152.0	Missense_Mutation	p.Ser2960Asn	ENST00000262738	missense_variant	S/N	aGc/aAc	MODERATE	SNV
CELSR1	chr22	46377203.0	Missense_Mutation	p.Ala2481Val	ENST00000262738	missense_variant	A/V	gCa/gTa	MODERATE	SNV
CELSR1	chr22	46397828.0	Silent	p.=	ENST00000262738	synonymous_variant	T	acG/acT	LOW	SNV
CELSR1	chr22	46464109.0	Missense_Mutation	p.Thr1261Ala	ENST00000262738	missense_variant	T/A	Acc/Gcc	MODERATE	SNV
CELSR1	chr22	46536173.0	Missense_Mutation	p.Arg333His	ENST00000262738	missense_variant	R/H	cGc/cAc	MODERATE	SNV
CELSR1	chr22	46365234.0	Nonsense_Mutation	p.Lys2851Ter	ENST00000262738	stop_gained	K/*	Aaa/Taa	HIGH	SNV
CELSR1	chr22	46381907.0	Missense_Mutation	p.Ile2343Val	ENST00000262738	missense_variant	I/V	Att/Gtt	MODERATE	SNV
CELSR1	chr22	46464062.0	Silent	p.=	ENST00000262738	synonymous_variant	P	ccG/ccA	LOW	SNV
CELSR1	chr22	46535026.0	Silent	p.=	ENST00000262738	synonymous_variant	D	gaC/gaT	LOW	SNV
CELSR1	chr22	46373016.0	Silent	p.=	ENST00000262738	synonymous_variant	Y	taC/taT	LOW	SNV
CELSR1	chr22	46389385.0	Missense_Mutation	p.Arg2154Cys	ENST00000262738	missense_variant	R/C	Cgc/Tgc	MODERATE	SNV
CELSR1	chr22	46369187.0	Frame_Shift_Del	p.Ile2650SerfsTer5	ENST00000262738	frameshift_variant	K/X	aaA/aa	HIGH	deletion
CELSR1	chr22	46536174.0	Missense_Mutation	p.Arg333Cys	ENST00000262738	missense_variant	R/C	Cgc/Tgc	MODERATE	SNV
CELSR1	chr22	46411633.0	Missense_Mutation	p.Ala1580Thr	ENST00000262738	missense_variant	A/T	Gct/Act	MODERATE	SNV
CELSR1	chr22	46369691.0	Splice_Site		ENST00000262738	splice_donor_variant			HIGH	SNV
CELSR1	chr22	46533978.0	Nonsense_Mutation	p.Glu1065Ter	ENST00000262738	stop_gained	E/*	Gag/Tag	HIGH	SNV
CELSR1	chr22	46534164.0	Missense_Mutation	p.Glu1003Lys	ENST00000262738	missense_variant	E/K	Gaa/Aaa	MODERATE	SNV
CELSR1	chr22	46534558.0	Missense_Mutation	p.Gln871His	ENST00000262738	missense_variant	Q/H	caG/caT	MODERATE	SNV
CELSR1	chr22	46369746.0	Silent	p.=	ENST00000262738	synonymous_variant	S	tcG/tcA	LOW	SNV
CELSR1	chr22	46535531.0	Missense_Mutation	p.Ser547Tyr	ENST00000262738	missense_variant	S/Y	tCt/tAt	MODERATE	SNV
CELSR1	chr22	46389411.0	Missense_Mutation	p.Thr2145Met	ENST00000262738	missense_variant	T/M	aCg/aTg	MODERATE	SNV
CELSR1	chr22	46439387.0	Missense_Mutation	p.Arg1403His	ENST00000262738	missense_variant	R/H	cGc/cAc	MODERATE	SNV
CELSR1	chr22	46378611.0	Missense_Mutation	p.Met2455Val	ENST00000262738	missense_variant	M/V	Atg/Gtg	MODERATE	SNV
CELSR1	chr22	46390466.0	Missense_Mutation	p.Ser2091Gly	ENST00000262738	missense_variant	S/G	Agc/Ggc	MODERATE	SNV
CELSR1	chr22	46382032.0	Missense_Mutation	p.Pro2301Leu	ENST00000262738	missense_variant	P/L	cCg/cTg	MODERATE	SNV
CELSR1	chr22	46439272.0	Missense_Mutation	p.Glu1441Asp	ENST00000262738	missense_variant	E/D	gaG/gaT	MODERATE	SNV
CELSR1	chr22	46534852.0	Silent	p.=	ENST00000262738	synonymous_variant	A	gcG/gcA	LOW	SNV
CELSR1	chr22	46364139.0	Silent	p.=	ENST00000262738	synonymous_variant	S	tcG/tcA	LOW	SNV
CELSR1	chr22	46389474.0	Missense_Mutation	p.Thr2124Met	ENST00000262738	missense_variant	T/M	aCg/aTg	MODERATE	SNV
CELSR1	chr22	46536103.0	Silent	p.=	ENST00000262738	synonymous_variant	S	tcG/tcA	LOW	SNV
TG	chr8	132887353.0	Missense_Mutation	p.Asp661Tyr	ENST00000220616	missense_variant	D/Y	Gac/Tac	MODERATE	SNV
TG	chr8	132906718.0	Missense_Mutation	p.Ser1222Leu	ENST00000220616	missense_variant	S/L	tCg/tTg	MODERATE	SNV
TG	chr8	132967961.0	Missense_Mutation	p.Arg1952Trp	ENST00000220616	missense_variant	R/W	Cgg/Tgg	MODERATE	SNV
TG	chr8	132887522.0	Missense_Mutation	p.Arg717Gln	ENST00000220616	missense_variant	R/Q	cGa/cAa	MODERATE	SNV
TG	chr8	132967831.0	Silent	p.=	ENST00000220616	synonymous_variant	E	gaG/gaA	LOW	SNV
TG	chr8	132966676.0	Missense_Mutation	p.Ala1889Thr	ENST00000220616	missense_variant	A/T	Gca/Aca	MODERATE	SNV
TG	chr8	132873085.0	Missense_Mutation	p.Asn168His	ENST00000220616	missense_variant	N/H	Aat/Cat	MODERATE	SNV
TG	chr8	132933669.0	Missense_Mutation	p.Ser1642Phe	ENST00000220616	missense_variant	S/F	tCt/tTt	MODERATE	SNV
TG	chr8	132933606.0	Missense_Mutation	p.Thr1621Met	ENST00000220616	missense_variant	T/M	aCg/aTg	MODERATE	SNV
TG	chr8	132948774.0	Splice_Site		ENST00000220616	splice_acceptor_variant			HIGH	SNV
TG	chr8	132933574.0	Silent	p.=	ENST00000220616	synonymous_variant	D	gaC/gaT	LOW	SNV
TG	chr8	132969563.0	Missense_Mutation	p.Ser1990Tyr	ENST00000220616	missense_variant	S/Y	tCt/tAt	MODERATE	SNV
TG	chr8	132972738.0	Missense_Mutation	p.Pro2066Ser	ENST00000220616	missense_variant	P/S	Ccc/Tcc	MODERATE	SNV
TG	chr8	132868189.0	Missense_Mutation	p.Tyr48Asp	ENST00000220616	missense_variant	Y/D	Tac/Gac	MODERATE	SNV
TG	chr8	132967826.0	Missense_Mutation	p.Ala1907Thr	ENST00000220616	missense_variant	A/T	Gca/Aca	MODERATE	SNV
TG	chr8	133096267.0	Missense_Mutation	p.Arg2489His	ENST00000220616	missense_variant	R/H	cGt/cAt	MODERATE	SNV
TG	chr8	133022060.0	Missense_Mutation	p.Ala2316Thr	ENST00000220616	missense_variant	A/T	Gct/Act	MODERATE	SNV
TG	chr8	133113569.0	Missense_Mutation	p.Ala2574Thr	ENST00000220616	missense_variant	A/T	Gcc/Acc	MODERATE	SNV
TG	chr8	132886886.0	Missense_Mutation	p.Gly505Asp	ENST00000220616	missense_variant	G/D	gGt/gAt	MODERATE	SNV
TG	chr8	132887251.0	Frame_Shift_Ins	p.Glu627AlafsTer37	ENST00000220616	frameshift_variant	E/AX	gag/gCag	HIGH	insertion
TG	chr8	132886818.0	Missense_Mutation	p.Gln482His	ENST00000220616	missense_variant	Q/H	caG/caT	MODERATE	SNV
TG	chr8	132886640.0	Missense_Mutation	p.Arg423His	ENST00000220616	missense_variant	R/H	cGc/cAc	MODERATE	SNV
TG	chr8	132887279.0	Missense_Mutation	p.Cys636Phe	ENST00000220616	missense_variant	C/F	tGc/tTc	MODERATE	SNV
TG	chr8	133095129.0	Missense_Mutation	p.Cys2442Phe	ENST00000220616	missense_variant	C/F	tGc/tTc	MODERATE	SNV
TG	chr8	133133520.0	Frame_Shift_Del	p.Trp2685GlyfsTer26	ENST00000220616	frameshift_variant	T/X	aCc/ac	HIGH	deletion
TG	chr8	132941511.0	Silent	p.=	ENST00000220616	synonymous_variant	C	tgC/tgT	LOW	SNV
TG	chr8	133022052.0	Missense_Mutation	p.Gly2313Val	ENST00000220616	missense_variant	G/V	gGa/gTa	MODERATE	SNV
TG	chr8	132935765.0	Missense_Mutation	p.Ala1648Thr	ENST00000220616	missense_variant	A/T	Gca/Aca	MODERATE	SNV
TG	chr8	133022101.0	Silent	p.=	ENST00000220616	synonymous_variant	I	atC/atT	LOW	SNV
TG	chr8	133134716.0	Frame_Shift_Del	p.Glu2744ValfsTer20	ENST00000220616	frameshift_variant	EE/EX	gaGGag/gaag	HIGH	deletion
TG	chr8	132882610.0	Missense_Mutation	p.Arg296Gln	ENST00000220616	missense_variant;splice_region_variant	R/Q	cGa/cAa	MODERATE	SNV
TG	chr8	132901473.0	Missense_Mutation	p.Gln1185Arg	ENST00000220616	missense_variant	Q/R	cAg/cGg	MODERATE	SNV
TG	chr8	133013756.0	Missense_Mutation	p.Arg2185Gln	ENST00000220616	missense_variant	R/Q	cGg/cAg	MODERATE	SNV
TG	chr8	132871454.0	Silent	p.=	ENST00000220616	synonymous_variant	A	gcG/gcA	LOW	SNV
TG	chr8	132886545.0	Silent	p.=	ENST00000220616	synonymous_variant	S	tcC/tcT	LOW	SNV
TG	chr8	132886735.0	Missense_Mutation	p.Arg455Cys	ENST00000220616	missense_variant	R/C	Cgt/Tgt	MODERATE	SNV
TG	chr8	133095070.0	Silent	p.=	ENST00000220616	synonymous_variant	A	gcC/gcT	LOW	SNV
TG	chr8	132871453.0	Missense_Mutation	p.Ala127Val	ENST00000220616	missense_variant	A/V	gCg/gTg	MODERATE	SNV
TG	chr8	132882980.0	Frame_Shift_Ins	p.Glu354GlyfsTer7	ENST00000220616	frameshift_variant	-/X	-/G	HIGH	insertion
TG	chr8	132871350.0	Missense_Mutation	p.Leu93Met	ENST00000220616	missense_variant;splice_region_variant	L/M	Ctg/Atg	MODERATE	SNV
TG	chr8	132887127.0	Silent	p.=	ENST00000220616	synonymous_variant	I	atC/atT	LOW	SNV
TG	chr8	133047815.0	Intron		ENST00000220616	intron_variant			MODIFIER	SNV
TG	chr8	132886982.0	Missense_Mutation	p.Ala537Val	ENST00000220616	missense_variant	A/V	gCt/gTt	MODERATE	SNV
TG	chr8	132913088.0	Missense_Mutation	p.Asp1401Tyr	ENST00000220616	missense_variant	D/Y	Gat/Tat	MODERATE	SNV
TG	chr8	133047570.0	Intron		ENST00000220616	intron_variant			MODIFIER	SNV
TG	chr8	133029921.0	Silent	p.=	ENST00000220616	synonymous_variant	R	cgC/cgT	LOW	SNV
TG	chr8	132898892.0	Silent	p.=	ENST00000220616	synonymous_variant	F	ttC/ttT	LOW	SNV
TG	chr8	132972702.0	Missense_Mutation	p.Glu2054Gln	ENST00000220616	missense_variant	E/Q	Gaa/Caa	MODERATE	SNV
TG	chr8	132882949.0	Frame_Shift_Ins	p.Gln342HisfsTer19	ENST00000220616	frameshift_variant	Q/HX	cag/caTg	HIGH	insertion
TG	chr8	132888027.0	Silent	p.=	ENST00000220616	synonymous_variant	R	agG/agA	LOW	SNV
TG	chr8	132898866.0	Nonsense_Mutation	p.Glu1096Ter	ENST00000220616	stop_gained	E/*	Gaa/Taa	HIGH	SNV
TG	chr8	132900275.0	Silent	p.=	ENST00000220616	synonymous_variant	G	ggC/ggA	LOW	SNV
TG	chr8	133096313.0	Silent	p.=	ENST00000220616	synonymous_variant	V	gtC/gtT	LOW	SNV
TG	chr8	132888433.0	Missense_Mutation	p.Leu876Ile	ENST00000220616	missense_variant	L/I	Ctc/Atc	MODERATE	SNV
TG	chr8	132882570.0	Frame_Shift_Ins	p.Arg283LeufsTer22	ENST00000220616	frameshift_variant	R/LSEX	cgg/cTTTCAGAgg	HIGH	insertion
TG	chr8	132882572.0	Silent	p.=	ENST00000220616	synonymous_variant	R	cgG/cgA	LOW	SNV
[truncated: 174 more rows]
